# Supplementary material
Source: Research Square preprint supplement (doi:10.21203/rs.3.rs-9452587/v1)
Supplement: Supplementary file 1 [file 2bbbc4571921c5f152f81fae.docx]

**Supplementary Information**

Supplementary Figure S1. Histograms of aggregated importance scores for UDL principle Multiple means of engagement by country. *Austria: Mean=3.13, SD=.46; Czech Republic: Mean=3.07, SD=.44; Latvia: Mean=3.09, SD=.42; Portugal: Mean=3.40, SD=.40.*

Supplementary Figure S2. Histograms of aggregated importance scores for UDL principle Multiple means of representation by country. *Note: Austria: Mean=2.78, SD=.46; Czech Republic: Mean=2.70, SD=.51; Latvia: Mean=2.80, SD=.46; Portugal: Mean=3.3, SD=.56.*

Supplementary Figure S3. Histograms of aggregated importance scores for UDL principle Multiple means of action & expression by country. *Austria: Mean=2.97, SD=.47; Czech Republic: Mean=2.79, SD=.53; Latvia: Mean=2.74, SD=.49; Portugal: Mean=3.33, SD=.56.*

Supplementary Figure S4. Centrality plots of UDL principles checkpoint interrelationships based on detailed importance ratings by country.

Supplementary Figure S5. Network graphs of UDL principles checkpoint relationships based on detailed importance ratings by country.

Supplementary Table S2. Socio-demographic and work context characteristics of respondents by country

| Supplementary Table S4. UDL Principles for pre-service teachers among different countries (Descriptive statistics, Kruskall-Wallis H test) |
| --- |

Supplementary Table S5. Comparison of in-service teachers' general importance rating and detailed importance score for UDL principle Multiple means of engagement by country (The Wilcoxon-signed-rank test)

Supplementary Table S6. Comparison of in-service teachers' general importance rating and detailed importance score for UDL principle Multiple means of representation by country (The Wilcoxon-signed-rank test)

Supplementary Table S7. Comparison of in-service teachers' general importance rating and detailed importance score for UDL principle Multiple means of action & expression by country (The Wilcoxon-signed-rank test)

Supplementary Table S8. Comparison of pre-service teachers' general importance rating and detailed importance score for UDL principle Multiple means of engagement by country (The Wilcoxon-signed-rank test)

Supplementary Table S9. Comparison of pre-service teachers' general importance rating and detailed importance score for UDL principle Multiple means of representation by country (The Wilcoxon-signed-rank test)

Supplementary Table S10. Comparison of pre-service teachers' general importance rating and detailed importance score for UDL principle Multiple means of action & expression by country (The Wilcoxon-signed-rank test).

Supplementary Table S11. Self-Assessment of UDL Principles Based on Encountered Implementation Challenges. *Challenge codes correspond to: 1 = Lack of resources; 2 = Limited knowledge/training; 3 = Time constraints; 4 = Resistance from colleagues/institution; 5 = Other.*

Supplementary Table S12. Self-Assessment of UDL Principles Based on Support Received for Implementation. *Support codes correspond to: 1 = Knowledge from study programs; 2 = Formal courses/diplomas; 3 = Self-directed learning; 4 = Collaboration with colleagues/staff; 5 = No relevant knowledge; 6 = Other.*
