# Supplementary material
Source: Research Square preprint supplement (doi:10.21203/rs.3.rs-9452587/v1)
Supplement: Supplementary file 1 [file 2189f1f93d975832464696a2.xlsx]

## Sheet: Sheet1
Timestamp	1.1. Valsts	1.2. Dzimums	1.3. Kāds ir jūsu augstākais akadēmiskās kvalifikācijas līmenis?	1.4. Darba pieredze (gadi):	1.5. Darba atrašanās vieta:	1.6. Kā jūs vērtējat pirmsskolas izglītības iestādi, kurā strādājat, attiecībā uz iekļaujošas izglītības prakses īstenošanu?	1.7. Bērnu vecums, ar kuriem Jūs ikdienā strādājat:	1.8. Cik bērnu šobrīd iegūst izglītību Jūsu pirmsskolas izglītības iestādes grupā?	1.9. Cik skolotāju, skolotāju palīgu vai asistentu katru dienu strādā Jūsu grupā?	1.10. Cik bērniem Jūsu grupā tiek īstenota speciālās izglītības programma?	1.11. Lūdzu, novērtējiet, cik svarīgi, Jūsuprāt, ir šādi UMD principos balstīti aspekti iekļaujošas mācību vides veicināšanai: [Bērnu iesaistīšana aktivitātēs, izmantojot dažādas metodes]	1.11. Lūdzu, novērtējiet, cik svarīgi, Jūsuprāt, ir šādi UMD principos balstīti aspekti iekļaujošas mācību vides veicināšanai: [Informācijas prezentēšana, izmantojot dažādus materiālus]	1.11. Lūdzu, novērtējiet, cik svarīgi, Jūsuprāt, ir šādi UMD principos balstīti aspekti iekļaujošas mācību vides veicināšanai: [Apgūto zināšanu paušana un novērtēšana dažādos veidos]	1.12. Lai atbildētu uz turpmākās sadaļas jautājumiem un novērtētu UMD principos ietvertās mācību metodes un stratēģijas, lūdzu norādiet savu šī brīža kvalifikāciju:	2.1. Interešu un identitāšu pieņemšana [2.1.1. Mācību mērķu un uzdevumu izvēle balstoties uz bērnu unikālajām interesēm, kultūras kontekstu, dzimumu, vecumposmu un spējām (piemēram, izvēles došana par galarezultāta atainošanu zīmējumā, skulptūrā, video vai audio formātā)]	2.1. Interešu un identitāšu pieņemšana [2.1.2. Uz rotaļām un praktiskām darbībām balstītas aktivitātes (piemēram, lomu spēles un ekskursijas dažādās vidēs – iekštelpās un dabā)]	2.1. Interešu un identitāšu pieņemšana [2.1.3. Prieka veicināšana veiktajās aktivitātēs un uzdevumos (piemēram, izmantojot pārsteigumus vai atklājumus aktivitāšu laikā)]	2.1. Interešu un identitāšu pieņemšana [2.1.4. Vides izveide, kurā tiek apzinātas dažādas bērna emocionālās un sensorās vajadzības (piemēram, dažādu ideju un jautājumu pētīšana un skaņu slāpējošu austiņu vai pielāgota apgaismojuma nodrošināšana)]	2.2. Noturīgas pūles un neatlaidība [2.2.1. Aktivitāšu mērķa izskaidrošana (piemēram, pastāstiet bērniem, kāpēc viņi mācās par dalīšanos, izmantojot galda un lomu spēles)]	2.2. Noturīgas pūles un neatlaidība [2.2.2. Dažādu izaicinājumu līmeņu nodrošināšana (piemēram, dažādu grūtību un apjoma uzdevumu piedāvāšana dažādiem prasmju līmeņiem)]	2.2. Noturīgas pūles un neatlaidība [2.2.3. Komandas darba veicināšana (piemēram, liekot bērniem kopīgi strādāt pie projektiem vai uzdevumiem)]	2.2. Noturīgas pūles un neatlaidība [2.2.4. Kopības sajūtas veidošana (piemēram, dalīšanās pieredzē par apgūstamās tēmas konceptiem)]	2.2. Noturīgas pūles un neatlaidība [2.2.5. Konkrētas, praktiskas atgriezeniskās saites sniegšana (piemēram, sakot bērnam: "Man patīk, kā jūs dalījāties ar savām rotaļlietām ar savu draugu!")]	2.3. Emocionālās spējas [2.3.1. Bērnu gaidu apzināšanās un motivācijas veicināšana aktivitātēs (piemēram, noskaidrot, ko varēs izlasīt, kad apgūs lasītprasmi vai kāds būs apbalvojums par veikto uzdevumu)]	2.3. Emocionālās spējas [2.3.2. Emociju paušanas un pašregulācijas spēju attīstīšana (piemēram, emociju paušana, izmantojot emocijzīmes vai uzvedības reakciju apguve lomu spēlēs)]	2.3. Emocionālās spējas [2.3.3. Savu sniegumu un progresa izvērtēšana (piemēram, veidot diagrammas ar apgūto burtu vai piktogrammu skaitu noteiktā periodā)]	2.3. Emocionālās spējas [2.3.4. Empātijas modelēšana, izmantojot diskusijas vai lomu spēles (piemēram, izmantojot diskusijas vai lomu spēles)]	3.1. Uztvere [3.1.1. Informācijas attēlošanas pielāgošana (piemēram, digitālie rīki ar burtu lieluma un krāsu kontrasta pielāgošana)]	3.1. Uztvere [3.1.2. Informācijas sniegšana, izmantojot dažādus formātus (piemēram, izmantojot videoklipus, audio materiālus un kustību aktivitātes)]	3.1. Uztvere [3.1.3. Temata attēlošana autentiskā veidā (piemēram, dažādu stāstu stāstīšana par dažādām valodām un kultūrām vēsturiskā formātā)]	3.2. Valoda un simboli [3.2.1. Izpratnes veicināšana par vārdiem, simboliem un skaitļiem dažādos formātos (piemēram, grafiku un diagrammu veidošana)]	3.2. Valoda un simboli [3.2.2. Izpratnes veicināšana par simboliem un skaitļiem praktiskā darbībā]	3.2. Valoda un simboli [3.2.3. Konceptu atspoguļošana, izmantojot dažādas kultūras, valodas un dialektus (piemēram, jēdzienu skaidrošana dažādās valodās un simbolos)]	3.2. Valoda un simboli [3.2.4. Aizspriedumu novēršana par dažādām valodām un komunikācijas līdzekļiem (piemēram, simbolu un izteiksmes līdzekļu,i vārdu un frāžu apguve dažādās valodās)]	3.2. Valoda un simboli [3.2.5. Temata attēlošana, izmantojot dažādus reprezentācijas veidus (piemēram, ar video, grafikiem un interaktīvām aktivitātēm)]	3.3. Zināšanu veidošana [3.3.1. Esošo un apgūstamo zināšanu sasaiste (piemēram, esošo zināšanu par dzīvām radībām sasaiste ar konkrētām ekosistēmām)]	3.3. Zināšanu veidošana [3.3.2. Būtiskāko jēdzienu un sakarību salīdzināšana (piemēram, dzīvnieku raksturīgo pazīmju salīdzināšana)]	3.3. Zināšanu veidošana [3.3.3. Daudzveidīgu interešu un identitāšu apzināšana (piemēram, zīmējot dažādus karogus vai salīdzinot dažādas acu/matu krāsas)]	3.3. Zināšanu veidošana [3.3.4. Tematu sasaiste un jēdzienu vispārināšana (piemēram, ceļa zīmju apguve pastaigu laikā vai dažādu sugu, krāsu un izmēra suņu iepazīšana)]	4.1. Mijiedarbība [4.1.1. Piekļuves un paredzamības nodrošināšana dažādām vidēm (piemēram, izmantot taktilas, audiālas, simboliskas un krāsainas norādes bērna apkārtējā vidē)]	4.1. Mijiedarbība [4.1.2. Piekļuves nodrošināšana materiāliem un palīgrīkiem (piemēram, izmantojot skaņu slāpējošas austiņas, dārznieka cimdus un alternatīvās komunikācijas līdzekļus)]	4.2. Izteiksme un komunikācija [4.2.1. Dažādu saziņas līdzekļu izmantošana (piemēram, ļaujot bērniem paust idejas, izmantojot mākslu, mūziku vai kustību)]	4.2. Izteiksme un komunikācija [4.2.2. Dažādu materiālu nodrošināšana (piemēram, dažādu materiālu izmantošana uzdevumu veikšanā)]	4.2. Izteiksme un komunikācija [4.2.3. Atbalsta sniegšana un pakāpeniska samazināšana (piemēram, izmantot verbālu un vizuālu fizisku atbalstu, kuru pakāpeniski samazina)]	4.2. Izteiksme un komunikācija [4.2.4. Dažādu runas un izteiksmes līdzekļu izmantošana (piemēram, dažādas valodas vai alternatīvās komunikācijas līdzekļi)]	4.3. Stratēģiskās domāšanas attīstīšana [4.3.1. Jēgpilnu mērķu izvirzīšana kopā ar bērniem (piemēram, izvirzot mērķus apgūt trīs dažādus jaunus vārdus nedēļa laikā, veicot dažādas aktivitātes)]	4.3. Stratēģiskās domāšanas attīstīšana [4.3.2. Aktivitāšu izaicinājumu paredzēšana (piemēram, bibliotēkas apmeklēšana un iespējamo grūtību paredzēšana ceļā vai bibliotēkā)]	4.3. Stratēģiskās domāšanas attīstīšana [4.3.3. Resursu un informācijas organizācija (piemēram, marķējumi uz materiāliem un mēbelēm)]	4.3. Stratēģiskās domāšanas attīstīšana [4.3.4. Sava progresa novērtēšana jeb pašrefleksija par apgūtajām prasmēm (piemēram, apgūtajiem konceptiem, burtiem un jēdzieniem izmantojot diagrammas vai tabulas)]
5/13/2025 13:32:25	Latvija	Sieviete	Bakalaura grāds	Vairāk nekā 10 gadi	Mazpilsētā	Neiekļaujoša (izglītības iestādē netiek īstenotas speciālās izglītības programmas)	3 - 5 gadi	16 - 20 bērni	1 - 2	Nav attiecināms	Drīzāk svarīgi	Drīzāk svarīgi	Drīzāk svarīgi	Pedagogs	Bieži	Vienmēr	Bieži	Bieži	Vienmēr	Vienmēr	Vienmēr	Bieži	Vienmēr	Bieži	Bieži	Dažreiz	Bieži	Bieži	Bieži	Bieži	Dažreiz	Bieži	Bieži	Vienmēr	Bieži	Bieži	Bieži	Bieži	Vienmēr	Bieži	Bieži	Vienmēr	Vienmēr	Vienmēr	Vienmēr	Vienmēr	Vienmēr	Vienmēr	Dažreiz
5/13/2025 14:15:54	Latvija	Sieviete	Maģistra grāds	Mazāk par vienu gadu	Lielpilsētā	Iekļaujoša (izglītības iestādē tiek īstenotas speciālās izglītības programmas)	1 - 3 gadi	16 - 20 bērni	2 - 4	Nevienam	Ļoti svarīgi	Ļoti svarīgi	Ļoti svarīgi	Pedagogs	Bieži	Vienmēr	Vienmēr	Bieži	Bieži	Bieži	Vienmēr	Bieži	Vienmēr	Bieži	Dažreiz, Bieži	Bieži	Vienmēr	Vienmēr	Vienmēr	Vienmēr	Bieži	Bieži	Vienmēr	Vienmēr	Bieži	Bieži	Vienmēr	Vienmēr	Vienmēr	Bieži	Bieži	Vienmēr	Vienmēr	Bieži	Vienmēr	Bieži	Vienmēr	Bieži	Bieži
5/13/2025 14:19:03	Latvija	Sieviete	Pašlaik iegūst kvalifikāciju	Mazāk par vienu gadu	Lauku apvidū	Iekļaujoša (izglītības iestādē tiek īstenotas speciālās izglītības programmas)	6 - 8 gadi	16 - 20 bērni	2 - 4	Nevienam	Ļoti svarīgi	Ļoti svarīgi	Ļoti svarīgi	Studējošs pedagogs	Vienmēr	Vienmēr	Bieži	Vienmēr	Vienmēr	Vienmēr	Vienmēr	Vienmēr	Vienmēr	Bieži	Vienmēr	Bieži	Vienmēr	Bieži	Bieži	Dažreiz	Bieži	Bieži	Bieži	Dažreiz	Bieži	Vienmēr	Vienmēr	Bieži	Bieži	Bieži	Dažreiz	Bieži	Bieži	Dažreiz	Dažreiz	Vienmēr	Vienmēr	Bieži	Bieži
5/13/2025 14:27:15	Latvija	Sieviete	Profesionālā augstākā izglītība (1. līmenis)	3 - 5 gadi	Lielpilsētā	Neiekļaujoša (izglītības iestādē netiek īstenotas speciālās izglītības programmas)	3 - 5 gadi	16 - 20 bērni	2 - 4	Nevienam	Ļoti svarīgi	Ļoti svarīgi	Ļoti svarīgi	Pedagogs	Vienmēr	Vienmēr	Vienmēr	Bieži	Vienmēr	Bieži	Vienmēr	Bieži	Vienmēr	Vienmēr	Bieži	Dažreiz	Vienmēr	Vienmēr	Bieži	Vienmēr	Vienmēr	Vienmēr	Bieži	Dažreiz	Vienmēr	Vienmēr	Vienmēr	Bieži	Vienmēr	Nekad	Nekad	Vienmēr	Vienmēr	Vienmēr	Vienmēr	Dažreiz	Dažreiz	Vienmēr	Bieži
5/13/2025 14:27:49	Latvija	Sieviete	Bakalaura grāds	Vairāk nekā 10 gadi	Mazpilsētā	Iekļaujoša (izglītības iestādē tiek īstenotas speciālās izglītības programmas)	Jaukti vecumi	11 - 15 bērni	2 - 4	Vairāk nekā 5 bērniem	Drīzāk svarīgi	Ļoti svarīgi	Ļoti svarīgi	Pedagogs	Bieži	Bieži	Bieži	Dažreiz	Vienmēr	Bieži	Bieži	Dažreiz	Vienmēr	Bieži	Dažreiz	Nekad	Dažreiz	Dažreiz	Bieži	Dažreiz	Dažreiz	Dažreiz	Nekad	Nekad	Dažreiz	Dažreiz	Bieži	Dažreiz	Bieži	Dažreiz	Nekad	Bieži	Vienmēr	Bieži	Bieži	Bieži	Dažreiz	Dažreiz	Dažreiz
5/13/2025 14:28:37	Latvija	Sieviete	Bakalaura grāds	Vairāk nekā 10 gadi	Lielpilsētā	Neiekļaujoša (izglītības iestādē netiek īstenotas speciālās izglītības programmas)	6 - 8 gadi	16 - 20 bērni	1 - 2	Nevienam	Ļoti svarīgi	Ļoti svarīgi	Ļoti svarīgi	Pedagogs	Bieži	Vienmēr	Bieži	Vienmēr	Vienmēr	Vienmēr	Bieži	Bieži	Bieži	Vienmēr	Vienmēr	Dažreiz	Bieži	Bieži	Bieži	Bieži	Bieži	Bieži	Bieži	Dažreiz	Bieži	Bieži	Bieži	Bieži	Bieži	Bieži	Dažreiz	Bieži	Bieži	Bieži	Bieži	Bieži	Bieži	Bieži	Dažreiz
5/13/2025 14:44:28	Latvija	Sieviete	Profesionālā augstākā izglītība (1. līmenis)	3 - 5 gadi	Lielpilsētā	Iekļaujoša (izglītības iestādē tiek īstenotas speciālās izglītības programmas)	6 - 8 gadi	16 - 20 bērni	1 - 2	Nevienam	Drīzāk svarīgi	Drīzāk svarīgi	Drīzāk svarīgi	Pedagogs	Bieži	Bieži	Bieži	Bieži	Dažreiz	Bieži	Dažreiz	Bieži	Bieži	Bieži	Dažreiz	Dažreiz	Dažreiz	Vienmēr	Vienmēr	Bieži	Bieži	Bieži	Bieži	Bieži		Bieži	Bieži	Vienmēr	Vienmēr	Bieži	Vienmēr	Bieži	Bieži	Bieži	Bieži	Dažreiz	Bieži	Bieži	Bieži
5/13/2025 14:45:49	Latvija	Sieviete	Profesionālā augstākā izglītība (1. līmenis)	6 - 10 gadi	Lielpilsētā	Iekļaujoša (izglītības iestādē tiek īstenotas speciālās izglītības programmas)	3 - 5 gadi	16 - 20 bērni	1 - 2	Nevienam	Ļoti svarīgi	Ļoti svarīgi	Ļoti svarīgi	Pedagogs	Vienmēr	Vienmēr	Vienmēr	Vienmēr	Vienmēr	Vienmēr	Vienmēr	Vienmēr	Vienmēr	Vienmēr	Vienmēr	Bieži	Bieži	Vienmēr	Vienmēr	Bieži	Bieži	Vienmēr	Vienmēr	Vienmēr	Vienmēr	Vienmēr	Vienmēr	Vienmēr	Vienmēr	Vienmēr	Bieži	Vienmēr	Vienmēr	Vienmēr	Vienmēr	Vienmēr	Bieži	Vienmēr	Vienmēr
5/13/2025 15:05:59	Latvija	Sieviete	Maģistra grāds	Vairāk nekā 10 gadi	Lielpilsētā	Neiekļaujoša (izglītības iestādē netiek īstenotas speciālās izglītības programmas)	3 - 5 gadi	21 - 25 bērni	1 - 2	Nevienam	Ļoti svarīgi	Ļoti svarīgi	Ļoti svarīgi	Pedagogs	Bieži	Bieži	Bieži	Dažreiz	Bieži	Bieži	Bieži	Dažreiz	Dažreiz	Dažreiz	Bieži	Vienmēr	Dažreiz	Nekad	Bieži	Dažreiz	Nekad	Bieži	Nekad, Dažreiz	Nekad	Bieži	Dažreiz	Bieži	Dažreiz	Dažreiz	Nekad	Nekad	Dažreiz	Dažreiz	Dažreiz, Bieži	Nekad	Dažreiz	Bieži	Dažreiz	Vienmēr
5/13/2025 15:44:11	Latvija	Sieviete	Maģistra grāds	Vairāk nekā 10 gadi	Lauku apvidū	Neiekļaujoša (izglītības iestādē netiek īstenotas speciālās izglītības programmas)	6 - 8 gadi	21 - 25 bērni	2 - 4	Nevienam	Ļoti svarīgi	Ļoti svarīgi	Ļoti svarīgi	Pedagogs	Bieži	Vienmēr	Vienmēr	Vienmēr	Vienmēr	Vienmēr	Bieži	Bieži	Vienmēr	Bieži	Vienmēr	Bieži	Bieži	Vienmēr	Vienmēr	Bieži	Vienmēr	Vienmēr	Bieži	Bieži	Vienmēr	Vienmēr	Vienmēr	Bieži	Vienmēr	Bieži	Dažreiz	Vienmēr	Vienmēr	Vienmēr	Bieži	Dažreiz	Dažreiz	Bieži	Bieži
5/13/2025 15:52:55	Latvija	Sieviete	Bakalaura grāds	Vairāk nekā 10 gadi	Mazpilsētā	Iekļaujoša (izglītības iestādē tiek īstenotas speciālās izglītības programmas)	Jaukti vecumi	11 - 15 bērni	5 un vairāk	Vairāk nekā 5 bērniem	Ļoti svarīgi	Drīzāk svarīgi	Drīzāk svarīgi	Pedagogs	Vienmēr	Vienmēr	Vienmēr	Vienmēr	Vienmēr	Vienmēr	Bieži	Bieži	Vienmēr	Vienmēr	Vienmēr	Bieži	Bieži	Vienmēr	Vienmēr	Bieži	Dažreiz	Bieži	Dažreiz	Vienmēr	Vienmēr	Vienmēr	Vienmēr	Dažreiz	Bieži	Vienmēr	Vienmēr	Vienmēr	Vienmēr	Vienmēr	Vienmēr	Dažreiz	Dažreiz	Vienmēr	Dažreiz
5/13/2025 15:57:40	Latvija	Sieviete	Profesionālā augstākā izglītība (1. līmenis)	6 - 10 gadi	Mazpilsētā	Iekļaujoša (izglītības iestādē tiek īstenotas speciālās izglītības programmas)	Jaukti vecumi	11 - 15 bērni	5 un vairāk	Vairāk nekā 5 bērniem	Ļoti svarīgi	Drīzāk svarīgi	Drīzāk svarīgi	Pedagogs	Bieži	Dažreiz	Dažreiz	Bieži	Bieži	Bieži	Dažreiz	Dažreiz	Bieži	Dažreiz	Bieži	Nekad	Dažreiz	Bieži	Bieži	Bieži	Nekad	Bieži	Nekad	Nekad	Bieži	Dažreiz	Dažreiz	Dažreiz	Bieži	Dažreiz	Dažreiz	Dažreiz	Bieži	Bieži	Dažreiz	Dažreiz	Dažreiz	Dažreiz	Nekad
5/13/2025 16:00:21	Latvija	Sieviete	Bakalaura grāds	Vairāk nekā 10 gadi	Mazpilsētā	Iekļaujoša (izglītības iestādē tiek īstenotas speciālās izglītības programmas)	3 - 5 gadi, 6 - 8 gadi, Jaukti vecumi	26 un vairāk bērni	5 un vairāk	Vairāk nekā 5 bērniem	Ļoti svarīgi	Ļoti svarīgi	Ļoti svarīgi	Pedagogs	Bieži	Vienmēr	Bieži	Vienmēr	Vienmēr	Vienmēr	Vienmēr	Bieži	Vienmēr	Dažreiz	Bieži	Dažreiz	Dažreiz	Vienmēr	Bieži	Bieži	Dažreiz	Bieži	Bieži	Dažreiz	Dažreiz	Dažreiz	Bieži	Bieži	Bieži	Bieži	Vienmēr	Vienmēr	Vienmēr	Vienmēr	Vienmēr	Bieži	Bieži	Bieži	Bieži
5/13/2025 18:18:08	Latvija	Sieviete	Profesionālā augstākā izglītība (1. līmenis)	1 - 2 gadi	Mazpilsētā	Nav attiecināms	3 - 5 gadi	16 - 20 bērni	1 - 2	Nevienam	Drīzāk svarīgi	Drīzāk svarīgi	Drīzāk svarīgi	Pedagogs	Bieži	Bieži	Bieži	Bieži	Dažreiz	Dažreiz	Dažreiz	Dažreiz	Dažreiz	Dažreiz	Dažreiz	Dažreiz	Dažreiz	Dažreiz	Dažreiz	Dažreiz	Dažreiz	Dažreiz	Dažreiz	Dažreiz	Dažreiz	Dažreiz	Dažreiz	Dažreiz	Dažreiz	Dažreiz	Dažreiz	Dažreiz	Dažreiz	Dažreiz	Dažreiz	Dažreiz	Dažreiz	Dažreiz	Dažreiz
5/13/2025 18:26:35	Latvija	Sieviete	Bakalaura grāds	Vairāk nekā 10 gadi	Mazpilsētā	Iekļaujoša (izglītības iestādē tiek īstenotas speciālās izglītības programmas)	Jaukti vecumi	11 - 15 bērni	5 un vairāk	Vairāk nekā 5 bērniem	Drīzāk svarīgi	Ļoti svarīgi		Pedagogs	Bieži	Bieži	Vienmēr	Vienmēr	Bieži	Vienmēr	Vienmēr	Bieži	Bieži	Bieži	Vienmēr	Bieži	Bieži	Bieži	Dažreiz	Dažreiz	Dažreiz	Bieži	Dažreiz	Bieži	Bieži	Bieži	Vienmēr	Bieži	Bieži	Dažreiz	Bieži	Bieži	Bieži	Bieži	Bieži	Dažreiz	Bieži	Dažreiz	Dažreiz
5/13/2025 18:30:08	Latvija	Sieviete	Pašlaik iegūst kvalifikāciju	1 - 2 gadi	Lielpilsētā	Iekļaujoša (izglītības iestādē tiek īstenotas speciālās izglītības programmas)	6 - 8 gadi	21 - 25 bērni	2 - 4	Nevienam	Drīzāk svarīgi	Drīzāk svarīgi	Drīzāk svarīgi	Studējošs pedagogs	Dažreiz	Bieži	Bieži	Nekad, Dažreiz	Bieži	Bieži	Bieži	Bieži	Bieži	Bieži	Bieži	Dažreiz	Bieži	Dažreiz	Bieži	Dažreiz	Dažreiz	Bieži	Dažreiz	Dažreiz	Bieži	Bieži	Bieži	Bieži	Bieži	Dažreiz	Dažreiz	Bieži	Bieži	Dažreiz	Nekad	Dažreiz	Dažreiz	Bieži	Dažreiz
5/13/2025 19:09:44	Latvija	Sieviete	Maģistra grāds	Vairāk nekā 10 gadi	Mazpilsētā	Iekļaujoša (izglītības iestādē tiek īstenotas speciālās izglītības programmas)	Nav attiecināms	Nav attiecināms	1 - 2	3 - 5 bērniem	Ļoti svarīgi	Ļoti svarīgi	Ļoti svarīgi	Pedagogs	Bieži	Bieži	Dažreiz	Dažreiz	Bieži	Bieži	Dažreiz	Bieži	Bieži	Bieži	Bieži	Bieži	Dažreiz	Vienmēr	Vienmēr	Bieži	Bieži	Bieži	Bieži	Bieži	Vienmēr	Vienmēr	Bieži	Bieži	Bieži	Bieži	Dažreiz	Bieži	Vienmēr	Bieži	Bieži	Bieži	Bieži	Dažreiz	Vienmēr
5/13/2025 19:21:38	Latvija	Sieviete	Bakalaura grāds	3 - 5 gadi	Mazpilsētā	Neiekļaujoša (izglītības iestādē netiek īstenotas speciālās izglītības programmas)	6 - 8 gadi	21 - 25 bērni	1 - 2	Nevienam	Ļoti svarīgi	Ļoti svarīgi	Ļoti svarīgi	Pedagogs	Bieži	Vienmēr	Vienmēr	Bieži, Vienmēr	Vienmēr	Vienmēr	Bieži	Bieži	Bieži	Bieži	Vienmēr	Dažreiz	Bieži	Dažreiz	Bieži	Bieži	Dažreiz	Bieži	Vienmēr	Vienmēr	Vienmēr	Vienmēr	Bieži	Bieži	Bieži	Dažreiz	Nekad	Bieži	Bieži	Bieži	Bieži	Bieži	Bieži	Bieži	Bieži
5/13/2025 19:58:11	Latvija	Sieviete	Bakalaura grāds	Vairāk nekā 10 gadi	Lauku apvidū	Nav attiecināms	3 - 5 gadi, Jaukti vecumi	21 - 25 bērni	2 - 4	Nevienam	Ļoti svarīgi	Neitrāli / nav viedokļa	Drīzāk svarīgi	Pedagogs	Bieži	Vienmēr	Bieži	Bieži	Vienmēr	Bieži	Bieži	Bieži	Bieži	Bieži	Vienmēr	Bieži	Bieži	Bieži	Bieži	Bieži	Dažreiz	Dažreiz	Dažreiz	Dažreiz	Bieži	Bieži	Bieži	Dažreiz	Bieži	Bieži	Dažreiz	Bieži	Bieži	Bieži	Bieži	Bieži	Bieži	Dažreiz	Dažreiz
5/13/2025 20:07:16	Latvija	Sieviete	Profesionālā augstākā izglītība (1. līmenis)	3 - 5 gadi	Mazpilsētā	Iekļaujoša (izglītības iestādē tiek īstenotas speciālās izglītības programmas)	3 - 5 gadi	16 - 20 bērni	1 - 2	Nevienam	Drīzāk svarīgi	Drīzāk svarīgi	Drīzāk svarīgi	Pedagogs	Dažreiz	Vienmēr	Bieži	Dažreiz	Bieži	Bieži	Bieži	Bieži	Bieži	Dažreiz	Bieži	Nekad	Dažreiz	Nekad	Bieži	Nekad	Dažreiz	Bieži	Nekad	Nekad	Bieži	Dažreiz	Bieži	Nekad	Bieži	Dažreiz	Bieži	Bieži	Bieži	Bieži	Bieži	Dažreiz	Bieži	Dažreiz	Dažreiz
5/13/2025 20:22:23	Latvija	Sieviete	Profesionālā augstākā izglītība (1. līmenis)	Vairāk nekā 10 gadi	Mazpilsētā	Neiekļaujoša (izglītības iestādē netiek īstenotas speciālās izglītības programmas)	6 - 8 gadi	21 - 25 bērni	1 - 2	Nevienam	Ļoti svarīgi	Ļoti svarīgi	Ļoti svarīgi	Pedagogs	Bieži	Bieži	Bieži	Dažreiz	Vienmēr	Vienmēr	Bieži	Bieži	Bieži	Dažreiz	Dažreiz	Dažreiz	Bieži	Dažreiz	Dažreiz	Dažreiz	Dažreiz	Bieži	Dažreiz	Dažreiz	Bieži	Dažreiz	Bieži	Dažreiz	Vienmēr	Dažreiz	Nekad	Vienmēr	Vienmēr	Bieži	Dažreiz	Bieži	Bieži	Bieži	Bieži
5/13/2025 20:33:59	Latvija	Sieviete	Profesionālā augstākā izglītība (2. līmenis)	Vairāk nekā 10 gadi	Mazpilsētā	Neiekļaujoša (izglītības iestādē netiek īstenotas speciālās izglītības programmas)	Nav attiecināms	Nav attiecināms	2 - 4	Nevienam	Ļoti svarīgi	Ļoti svarīgi	Ļoti svarīgi	Pedagogs	Vienmēr	Bieži	Bieži	Bieži	Bieži	Vienmēr	Bieži	Bieži	Bieži	Bieži	Vienmēr	Bieži	Vienmēr	Dažreiz	Bieži	Bieži, Vienmēr	Dažreiz	Vienmēr	Nekad	Nekad	Bieži	Vienmēr	Vienmēr	Dažreiz	Vienmēr	Vienmēr	Bieži	Bieži	Vienmēr	Vienmēr	Dažreiz	Vienmēr	Bieži	Vienmēr	Bieži
5/14/2025 8:40:01	Latvija	Sieviete	Maģistra grāds	Vairāk nekā 10 gadi	Mazpilsētā	Iekļaujoša (izglītības iestādē tiek īstenotas speciālās izglītības programmas)	Jaukti vecumi	21 - 25 bērni	1 - 2	3 - 5 bērniem	Ļoti svarīgi	Drīzāk svarīgi	Ļoti svarīgi	Pedagogs	Bieži	Vienmēr	Vienmēr	Vienmēr	Bieži	Bieži	Vienmēr	Vienmēr	Bieži	Bieži	Vienmēr	Vienmēr	Bieži	Bieži	Dažreiz	Dažreiz	Bieži	Vienmēr	Bieži	Dažreiz	Dažreiz	Bieži	Vienmēr	Bieži	Vienmēr	Bieži	Bieži	Vienmēr	Vienmēr	Vienmēr	Dažreiz	Bieži	Vienmēr	Dažreiz	Vienmēr
5/14/2025 9:03:16	Latvija	Sieviete	Bakalaura grāds	Vairāk nekā 10 gadi	Mazpilsētā	Iekļaujoša (izglītības iestādē tiek īstenotas speciālās izglītības programmas)	6 - 8 gadi	16 - 20 bērni	2 - 4	Vairāk nekā 5 bērniem	Ļoti svarīgi	Drīzāk svarīgi	Drīzāk svarīgi	Pedagogs	Dažreiz	Bieži	Bieži	Dažreiz	Dažreiz	Vienmēr	Bieži	Dažreiz	Bieži	Bieži	Bieži	Nekad	Dažreiz	Nekad	Bieži	Nekad	Bieži	Vienmēr	Dažreiz	Vienmēr	Bieži	Bieži	Bieži	Vienmēr	Vienmēr	Bieži	Dažreiz	Bieži	Bieži	Vienmēr	Dažreiz	Bieži	Dažreiz	Bieži	Dažreiz
5/14/2025 9:13:17	Latvija	Sieviete	Bakalaura grāds	Vairāk nekā 10 gadi	Mazpilsētā	Iekļaujoša (izglītības iestādē tiek īstenotas speciālās izglītības programmas)	Jaukti vecumi	11 - 15 bērni	2 - 4	1 - 2 bērniem	Drīzāk svarīgi	Drīzāk svarīgi	Drīzāk svarīgi	Pedagogs	Dažreiz	Bieži	Bieži	Dažreiz	Bieži	Bieži	Bieži	Bieži	Bieži	Bieži	Bieži	Dažreiz	Bieži	Dažreiz	Bieži	Dažreiz	Dažreiz	Dažreiz	Dažreiz	Dažreiz	Dažreiz	Bieži	Bieži	Dažreiz	Dažreiz	Dažreiz	Dažreiz	Bieži	Bieži	Bieži	Bieži	Dažreiz	Bieži	Dažreiz	Dažreiz
5/14/2025 10:18:42	Latvija	Sieviete	Maģistra grāds	Vairāk nekā 10 gadi	Mazpilsētā	Iekļaujoša (izglītības iestādē tiek īstenotas speciālās izglītības programmas)	3 - 5 gadi, 6 - 8 gadi, Jaukti vecumi	16 - 20 bērni	1 - 2	3 - 5 bērniem	Drīzāk svarīgi	Ļoti svarīgi	Drīzāk svarīgi	Pedagogs	Dažreiz	Bieži	Vienmēr	Vienmēr	Bieži	Bieži	Dažreiz	Dažreiz	Bieži	Bieži	Bieži	Dažreiz	Bieži	Dažreiz	Dažreiz	Dažreiz	Dažreiz	Bieži	Dažreiz	Dažreiz	Dažreiz	Bieži	Bieži	Bieži	Bieži	Bieži	Dažreiz	Bieži	Bieži	Dažreiz	Dažreiz	Bieži	Dažreiz	Dažreiz	Dažreiz
5/14/2025 10:40:36	Latvija	Sieviete	Bakalaura grāds	Vairāk nekā 10 gadi	Mazpilsētā	Iekļaujoša (izglītības iestādē tiek īstenotas speciālās izglītības programmas)	Nav attiecināms	26 un vairāk bērni	1 - 2	Vairāk nekā 5 bērniem	Ļoti svarīgi	Ļoti svarīgi	Ļoti svarīgi	Pedagogs	Vienmēr	Vienmēr	Vienmēr	Dažreiz	Bieži	Bieži	Bieži	Vienmēr	Bieži	Vienmēr	Bieži	Bieži	Bieži	Dažreiz	Dažreiz	Dažreiz	Bieži	Bieži	Bieži	Bieži	Bieži	Dažreiz	Dažreiz	Dažreiz	Dažreiz	Dažreiz	Dažreiz	Dažreiz	Dažreiz	Dažreiz	Dažreiz	Dažreiz	Dažreiz	Dažreiz	Dažreiz
5/14/2025 11:24:15	Latvija	Sieviete	Bakalaura grāds	Vairāk nekā 10 gadi	Lielpilsētā	Iekļaujoša (izglītības iestādē tiek īstenotas speciālās izglītības programmas)	3 - 5 gadi	16 - 20 bērni	1 - 2	1 - 2 bērniem	Drīzāk svarīgi	Drīzāk svarīgi	Drīzāk svarīgi	Pedagogs	Bieži	Bieži	Vienmēr	Bieži	Vienmēr	Vienmēr	Vienmēr	Bieži	Vienmēr	Vienmēr	Vienmēr	Vienmēr	Vienmēr	Bieži	Bieži	Dažreiz	Dažreiz	Bieži	Dažreiz	Dažreiz	Dažreiz	Bieži	Bieži	Bieži	Bieži	Dažreiz	Dažreiz	Bieži	Bieži	Bieži	Bieži	Dažreiz	Bieži	Bieži	Dažreiz
5/14/2025 11:29:43	Latvija	Sieviete	Profesionālā augstākā izglītība (1. līmenis)	6 - 10 gadi	Lielpilsētā	Iekļaujoša (izglītības iestādē tiek īstenotas speciālās izglītības programmas)	1 - 3 gadi	16 - 20 bērni	1 - 2	Nevienam	Ļoti svarīgi	Drīzāk svarīgi	Ļoti svarīgi	Pedagogs	Bieži	Bieži	Bieži	Vienmēr	Vienmēr	Bieži	Dažreiz	Bieži	Vienmēr	Bieži	Vienmēr	Dažreiz	Dažreiz	Bieži	Bieži	Dažreiz	Vienmēr	Vienmēr	Dažreiz	Dažreiz	Dažreiz	Dažreiz	Bieži	Dažreiz	Bieži	Dažreiz	Dažreiz	Dažreiz	Bieži	Bieži	Dažreiz	Dažreiz	Bieži	Bieži	Bieži
5/14/2025 11:29:52	Latvija	Sieviete	Bakalaura grāds	6 - 10 gadi	Mazpilsētā	Iekļaujoša (izglītības iestādē tiek īstenotas speciālās izglītības programmas)	Jaukti vecumi	Nav attiecināms	Nav attiecināms	Vairāk nekā 5 bērniem	Ļoti svarīgi	Ļoti svarīgi	Drīzāk svarīgi	Pedagogs	Dažreiz	Dažreiz	Bieži	Bieži	Vienmēr	Dažreiz	Vienmēr	Dažreiz	Dažreiz	Vienmēr	Vienmēr	Nekad	Dažreiz	Vienmēr	Vienmēr	Vienmēr	Vienmēr	Dažreiz	Dažreiz	Dažreiz	Dažreiz	Vienmēr	Bieži	Bieži	Vienmēr	Bieži	Bieži	Dažreiz	Vienmēr	Bieži	Bieži	Dažreiz	Bieži	Dažreiz	Dažreiz
5/14/2025 11:32:04	Latvija	Sieviete	Bakalaura grāds	3 - 5 gadi	Lielpilsētā	Iekļaujoša (izglītības iestādē tiek īstenotas speciālās izglītības programmas)	1 - 3 gadi, 3 - 5 gadi	16 - 20 bērni	2 - 4	Nevienam	Drīzāk svarīgi	Drīzāk svarīgi	Drīzāk svarīgi	Studējošs pedagogs	Bieži	Vienmēr	Vienmēr	Vienmēr	Vienmēr	Bieži	Vienmēr	Vienmēr	Vienmēr	Dažreiz	Vienmēr	Nekad	Vienmēr	Vienmēr	Vienmēr	Bieži	Nekad	Bieži	Bieži	Vienmēr	Vienmēr	Vienmēr	Vienmēr	Vienmēr	Vienmēr	Bieži	Vienmēr	Vienmēr	Vienmēr	Vienmēr	Bieži	Vienmēr	Vienmēr	Vienmēr	Bieži
5/14/2025 11:36:10	Latvija	Sieviete	Profesionālā augstākā izglītība (1. līmenis)	3 - 5 gadi	Mazpilsētā	Iekļaujoša (izglītības iestādē tiek īstenotas speciālās izglītības programmas)	6 - 8 gadi	16 - 20 bērni	1 - 2	Nevienam	Drīzāk svarīgi	Drīzāk svarīgi	Ļoti svarīgi	Pedagogs	Dažreiz	Dažreiz	Bieži	Nekad	Dažreiz	Bieži	Bieži	Bieži	Vienmēr	Vienmēr	Vienmēr	Nekad	Nekad	Bieži	Bieži	Bieži	Nekad	Bieži	Nekad	Bieži	Vienmēr	Nekad	Vienmēr	Vienmēr	Vienmēr	Bieži	Nekad	Dažreiz	Vienmēr	Bieži	Bieži	Vienmēr	Vienmēr	Bieži	Bieži
5/14/2025 11:53:56	Latvija	Sieviete	Profesionālā augstākā izglītība (2. līmenis)	Vairāk nekā 10 gadi	Nav attiecināms	Iekļaujoša (izglītības iestādē tiek īstenotas speciālās izglītības programmas)	3 - 5 gadi	16 - 20 bērni	2 - 4	1 - 2 bērniem	Ļoti svarīgi	Ļoti svarīgi	Ļoti svarīgi	Pedagogs	Vienmēr	Vienmēr	Vienmēr	Vienmēr	Vienmēr	Vienmēr	Bieži	Vienmēr	Vienmēr	Vienmēr	Bieži	Bieži	Bieži	Vienmēr	Vienmēr	Vienmēr	Dažreiz	Vienmēr	Vienmēr	Vienmēr	Vienmēr	Vienmēr	Vienmēr	Vienmēr	Vienmēr	Vienmēr	Bieži	Dažreiz	Bieži	Bieži	Dažreiz	Bieži	Vienmēr	Bieži	Bieži
5/14/2025 11:57:04	Latvija	Sieviete	Bakalaura grāds	6 - 10 gadi	Mazpilsētā	Neiekļaujoša (izglītības iestādē netiek īstenotas speciālās izglītības programmas)	Jaukti vecumi	26 un vairāk bērni	1 - 2	Nevienam	Ļoti svarīgi	Ļoti svarīgi	Ļoti svarīgi	Pedagogs	Bieži	Bieži	Bieži	Nekad	Bieži	Bieži	Bieži	Bieži	Vienmēr	Dažreiz	Bieži	Nekad	Bieži	Nekad	Dažreiz	Dažreiz	Dažreiz	Dažreiz	Nekad	Dažreiz	Dažreiz	Dažreiz	Bieži	Nekad	Dažreiz	Nekad	Nekad	Bieži	Vienmēr	Bieži	Bieži	Dažreiz	Bieži	Dažreiz	Vienmēr
5/14/2025 12:25:12	Latvija	Sieviete	Bakalaura grāds	Vairāk nekā 10 gadi	Mazpilsētā	Iekļaujoša (izglītības iestādē tiek īstenotas speciālās izglītības programmas)	3 - 5 gadi	16 - 20 bērni	1 - 2	3 - 5 bērniem	Ļoti svarīgi	Ļoti svarīgi	Ļoti svarīgi	Pedagogs	Bieži	Bieži	Vienmēr	Bieži	Vienmēr	Vienmēr	Bieži	Bieži	Vienmēr	Bieži	Bieži	Bieži	Bieži	Bieži	Bieži	Dažreiz	Bieži	Bieži	Dažreiz	Bieži	Bieži	Bieži	Bieži	Bieži	Bieži	Dažreiz	Dažreiz	Bieži	Vienmēr	Vienmēr	Vienmēr	Vienmēr	Bieži	Bieži	Bieži
5/14/2025 12:42:17	Latvija	Sieviete	Profesionālā augstākā izglītība (2. līmenis)	Vairāk nekā 10 gadi	Mazpilsētā	Iekļaujoša (izglītības iestādē tiek īstenotas speciālās izglītības programmas)	3 - 5 gadi	16 - 20 bērni	1 - 2	Nevienam				Pedagogs	Bieži	Bieži	Bieži	Bieži	Bieži	Bieži	Bieži	Bieži	Bieži	Bieži	Bieži	Bieži	Bieži	Bieži	Bieži	Dažreiz	Dažreiz	Bieži	Dažreiz	Dažreiz	Dažreiz	Dažreiz	Dažreiz	Dažreiz	Bieži	Dažreiz	Nekad	Bieži	Bieži	Dažreiz	Dažreiz	Bieži	Dažreiz	Dažreiz	Dažreiz
5/14/2025 12:48:21	Latvija	Sieviete	Maģistra grāds	Vairāk nekā 10 gadi	Mazpilsētā	Iekļaujoša (izglītības iestādē tiek īstenotas speciālās izglītības programmas)	Jaukti vecumi	16 - 20 bērni	2 - 4	Nevienam	Ļoti svarīgi	Ļoti svarīgi	Ļoti svarīgi	Pedagogs	Bieži	Bieži	Dažreiz	Bieži	Bieži	Vienmēr	Vienmēr	Bieži	Vienmēr	Bieži	Vienmēr	Dažreiz	Bieži	Dažreiz	Bieži	Dažreiz, Bieži	Dažreiz	Bieži	Dažreiz	Dažreiz	Dažreiz	Bieži	Bieži	Bieži	Vienmēr	Dažreiz	Bieži	Bieži	Bieži	Dažreiz	Dažreiz	Bieži	Bieži	Bieži	Dažreiz
5/14/2025 12:49:55	Latvija	Sieviete	Bakalaura grāds	Vairāk nekā 10 gadi	Mazpilsētā	Iekļaujoša (izglītības iestādē tiek īstenotas speciālās izglītības programmas)	3 - 5 gadi, 6 - 8 gadi	26 un vairāk bērni	2 - 4	Vairāk nekā 5 bērniem	Ļoti svarīgi	Ļoti svarīgi	Ļoti svarīgi	Pedagogs	Vienmēr	Vienmēr	Vienmēr	Vienmēr	Vienmēr	Vienmēr	Vienmēr	Vienmēr	Vienmēr	Vienmēr	Vienmēr	Bieži	Bieži	Vienmēr	Bieži	Bieži	Vienmēr	Bieži	Dažreiz	Dažreiz	Dažreiz	Dažreiz	Bieži	Bieži	Bieži	Bieži	Dažreiz	Vienmēr	Vienmēr	Vienmēr	Vienmēr	Bieži	Dažreiz	Dažreiz	Vienmēr
5/14/2025 12:59:33	Latvija	Sieviete	Profesionālā augstākā izglītība (1. līmenis)	6 - 10 gadi	Lauku apvidū	Iekļaujoša (izglītības iestādē tiek īstenotas speciālās izglītības programmas)	6 - 8 gadi	16 - 20 bērni	1 - 2	1 - 2 bērniem	Ļoti svarīgi	Drīzāk svarīgi	Drīzāk svarīgi	Pedagogs	Bieži	Vienmēr	Bieži	Nekad	Bieži	Bieži	Dažreiz	Bieži	Vienmēr	Dažreiz	Dažreiz	Nekad	Bieži	Bieži	Vienmēr	Dažreiz	Nekad	Vienmēr	Nekad	Nekad	Dažreiz	Bieži	Bieži	Bieži	Vienmēr	Bieži	Nekad	Bieži	Vienmēr	Bieži	Bieži	Bieži	Bieži	Vienmēr	Dažreiz
5/14/2025 13:10:48	Latvija	Sieviete	Bakalaura grāds	Vairāk nekā 10 gadi	Mazpilsētā	Iekļaujoša (izglītības iestādē tiek īstenotas speciālās izglītības programmas)	Jaukti vecumi	21 - 25 bērni	2 - 4	Nevienam	Ļoti svarīgi	Ļoti svarīgi	Ļoti svarīgi	Pedagogs	Bieži	Bieži	Bieži	Bieži	Bieži	Dažreiz	Dažreiz	Dažreiz	Bieži	Bieži	Bieži	Dažreiz	Bieži	Bieži	Bieži	Dažreiz	Dažreiz	Vienmēr	Dažreiz	Dažreiz	Vienmēr	Vienmēr	Vienmēr	Bieži	Bieži	Bieži	Dažreiz	Vienmēr	Vienmēr	Vienmēr	Dažreiz, Bieži	Bieži	Bieži	Vienmēr	Dažreiz
5/14/2025 13:19:03	Latvija	Sieviete	Bakalaura grāds	Vairāk nekā 10 gadi	Lauku apvidū	Iekļaujoša (izglītības iestādē tiek īstenotas speciālās izglītības programmas)	Jaukti vecumi	11 - 15 bērni	1 - 2	Nevienam	Ļoti svarīgi	Ļoti svarīgi	Ļoti svarīgi	Pedagogs	Bieži	Bieži	Vienmēr	Vienmēr	Vienmēr	Vienmēr	Vienmēr	Vienmēr	Bieži	Vienmēr	Vienmēr	Bieži	Vienmēr	Vienmēr	Vienmēr	Vienmēr	Nekad	Dažreiz	Nekad	Nekad	Dažreiz	Bieži	Bieži	Bieži	Bieži	Vienmēr	Bieži	Bieži	Bieži	Vienmēr	Bieži	Bieži	Vienmēr	Vienmēr	Bieži
5/14/2025 13:28:54	Latvija	Sieviete	Bakalaura grāds	6 - 10 gadi	Mazpilsētā	Iekļaujoša (izglītības iestādē tiek īstenotas speciālās izglītības programmas)	6 - 8 gadi	21 - 25 bērni	2 - 4	3 - 5 bērniem	Ļoti svarīgi	Ļoti svarīgi	Ļoti svarīgi	Pedagogs	Vienmēr	Bieži	Bieži	Vienmēr	Vienmēr	Vienmēr	Vienmēr	Vienmēr	Vienmēr	Bieži	Bieži	Bieži	Vienmēr	Bieži	Bieži	Bieži	Bieži	Bieži	Dažreiz	Bieži	Bieži	Bieži	Bieži	Bieži	Bieži	Bieži	Vienmēr	Bieži	Vienmēr	Vienmēr	Vienmēr	Vienmēr	Bieži	Bieži	Dažreiz
5/14/2025 13:30:45	Latvija	Sieviete	Maģistra grāds	Vairāk nekā 10 gadi	Mazpilsētā	Iekļaujoša (izglītības iestādē tiek īstenotas speciālās izglītības programmas)	6 - 8 gadi	21 - 25 bērni	1 - 2	1 - 2 bērniem	Drīzāk svarīgi	Neitrāli / nav viedokļa	Drīzāk svarīgi	Pedagogs	Dažreiz	Bieži	Bieži	Dažreiz	Bieži	Bieži	Dažreiz	Bieži	Dažreiz	Dažreiz	Bieži	Dažreiz	Bieži	Bieži	Bieži	Dažreiz	Dažreiz	Dažreiz	Dažreiz	Dažreiz	Dažreiz	Bieži	Bieži	Dažreiz	Dažreiz	Nekad	Dažreiz	Bieži	Bieži	Dažreiz	Bieži	Dažreiz	Dažreiz	Dažreiz	Dažreiz
5/14/2025 13:50:46	Latvija	Sieviete	Bakalaura grāds	Vairāk nekā 10 gadi	Mazpilsētā	Iekļaujoša (izglītības iestādē tiek īstenotas speciālās izglītības programmas)	6 - 8 gadi	21 - 25 bērni	2 - 4	1 - 2 bērniem	Ļoti svarīgi	Ļoti svarīgi	Ļoti svarīgi	Pedagogs	Bieži	Bieži	Vienmēr	Bieži	Bieži	Vienmēr	Bieži	Dažreiz	Bieži	Bieži	Bieži	Nekad	Bieži	Dažreiz	Vienmēr	Dažreiz	Bieži	Vienmēr	Nekad	Nekad	Vienmēr	Vienmēr	Vienmēr	Dažreiz	Bieži	Vienmēr	Nekad	Vienmēr	Vienmēr	Bieži	Bieži	Bieži	Bieži	Dažreiz	Dažreiz
5/14/2025 13:50:49	Latvija	Sieviete	Profesionālā augstākā izglītība (2. līmenis)	Vairāk nekā 10 gadi	Lauku apvidū	Iekļaujoša (izglītības iestādē tiek īstenotas speciālās izglītības programmas)	3 - 5 gadi	26 un vairāk bērni	2 - 4	1 - 2 bērniem	Ļoti svarīgi	Ļoti svarīgi	Ļoti svarīgi	Pedagogs	Bieži	Bieži	Vienmēr	Bieži	Vienmēr	Bieži	Vienmēr	Bieži	Vienmēr	Bieži	Bieži	Dažreiz	Bieži	Bieži	Vienmēr	Bieži	Bieži	Bieži	Dažreiz	Dažreiz	Bieži	Bieži	Bieži	Bieži	Vienmēr	Bieži	Dažreiz	Vienmēr	Vienmēr	Bieži	Bieži	Vienmēr	Vienmēr	Vienmēr	Bieži
5/14/2025 13:55:11	Latvija	Sieviete	Bakalaura grāds, Profesionālā augstākā izglītība (2. līmenis)	Vairāk nekā 10 gadi	Lauku apvidū	Nav attiecināms	Jaukti vecumi	16 - 20 bērni	1 - 2	Nevienam	Ļoti svarīgi	Ļoti svarīgi	Ļoti svarīgi	Pedagogs	Bieži	Bieži	Bieži	Dažreiz	Bieži	Bieži	Dažreiz	Bieži	Bieži	Bieži	Bieži	Dažreiz	Dažreiz	Nekad	Bieži	Dažreiz	Dažreiz	Bieži	Dažreiz	Nekad	Dažreiz	Bieži	Vienmēr	Dažreiz	Vienmēr	Nekad	Nekad	Dažreiz	Dažreiz	Bieži	Dažreiz	Bieži	Dažreiz	Bieži	Dažreiz
5/14/2025 14:08:46	Latvija	Sieviete	Profesionālā augstākā izglītība (2. līmenis)	Vairāk nekā 10 gadi	Mazpilsētā	Iekļaujoša (izglītības iestādē tiek īstenotas speciālās izglītības programmas)	3 - 5 gadi	21 - 25 bērni	2 - 4	1 - 2 bērniem	Drīzāk svarīgi	Drīzāk svarīgi	Drīzāk svarīgi	Pedagogs	Vienmēr	Bieži	Bieži	Dažreiz	Dažreiz	Dažreiz	Bieži	Bieži	Bieži	Bieži	Dažreiz	Dažreiz	Dažreiz	Dažreiz	Bieži	Dažreiz	Dažreiz	Bieži	Nekad	Nekad	Dažreiz	Bieži	Bieži	Dažreiz	Bieži	Bieži	Dažreiz	Dažreiz	Bieži	Bieži	Bieži	Dažreiz	Dažreiz	Bieži	Dažreiz
5/14/2025 14:53:38	Latvija	Sieviete	Bakalaura grāds	6 - 10 gadi	Lauku apvidū	Neiekļaujoša (izglītības iestādē netiek īstenotas speciālās izglītības programmas)			1 - 2	Nevienam	Ļoti svarīgi	Ļoti svarīgi	Ļoti svarīgi	Pedagogs	Bieži	Bieži	Bieži	Bieži	Bieži	Bieži	Bieži	Bieži	Bieži	Bieži	Bieži	Bieži	Bieži	Bieži	Bieži	Bieži	Bieži	Bieži	Bieži	Bieži	Bieži	Bieži	Bieži	Bieži	Bieži	Bieži	Bieži	Bieži	Bieži	Bieži	Bieži	Bieži	Bieži	Bieži	Bieži
5/14/2025 14:59:18	Latvija	Sieviete	Pašlaik iegūst kvalifikāciju	1 - 2 gadi	Lauku apvidū	Iekļaujoša (izglītības iestādē tiek īstenotas speciālās izglītības programmas)	3 - 5 gadi	16 - 20 bērni	2 - 4	1 - 2 bērniem	Drīzāk svarīgi	Drīzāk svarīgi	Drīzāk svarīgi	Studējošs pedagogs	Dažreiz	Bieži	Bieži	Bieži	Bieži	Dažreiz	Dažreiz	Bieži	Bieži	Bieži	Bieži	Dažreiz	Bieži	Bieži	Bieži	Bieži	Dažreiz	Dažreiz	Dažreiz	Bieži	Dažreiz	Dažreiz	Bieži	Bieži	Bieži	Dažreiz	Nekad	Dažreiz	Bieži	Dažreiz	Bieži	Dažreiz	Dažreiz	Bieži	Bieži
5/14/2025 15:12:36	Latvija	Sieviete	Bakalaura grāds	Vairāk nekā 10 gadi	Mazpilsētā	Neiekļaujoša (izglītības iestādē netiek īstenotas speciālās izglītības programmas), Nav attiecināms	6 - 8 gadi	21 - 25 bērni	1 - 2	Nevienam	Ļoti svarīgi	Drīzāk svarīgi	Ļoti svarīgi	Pedagogs	Bieži	Bieži	Bieži	Dažreiz	Dažreiz	Bieži	Dažreiz	Bieži	Bieži	Bieži	Bieži	Dažreiz	Dažreiz	Dažreiz	Bieži	Dažreiz	Dažreiz	Dažreiz	Dažreiz	Dažreiz	Dažreiz	Vienmēr	Bieži	Bieži	Vienmēr	Dažreiz	Bieži	Vienmēr	Bieži	Bieži	Dažreiz	Bieži	Bieži	Dažreiz	Bieži
5/14/2025 15:31:52	Latvija	Sieviete	Bakalaura grāds	Vairāk nekā 10 gadi	Mazpilsētā	Iekļaujoša (izglītības iestādē tiek īstenotas speciālās izglītības programmas)	3 - 5 gadi	26 un vairāk bērni	1 - 2	3 - 5 bērniem	Drīzāk svarīgi	Drīzāk svarīgi	Drīzāk svarīgi	Pedagogs	Bieži	Bieži	Bieži	Bieži	Dažreiz	Dažreiz	Bieži	Bieži	Bieži	Vienmēr	Vienmēr	Vienmēr	Vienmēr	Bieži	Bieži	Bieži	Bieži	Bieži	Bieži	Bieži	Bieži	Bieži	Bieži	Bieži	Bieži	Dažreiz	Bieži	Dažreiz	Bieži	Vienmēr	Vienmēr	Vienmēr	Bieži	Bieži	Vienmēr
5/14/2025 15:54:44	Latvija	Sieviete	Bakalaura grāds	Vairāk nekā 10 gadi	Mazpilsētā	Neiekļaujoša (izglītības iestādē netiek īstenotas speciālās izglītības programmas)	Jaukti vecumi	21 - 25 bērni	2 - 4	Nevienam	Ļoti svarīgi	Drīzāk svarīgi	Drīzāk svarīgi, Ļoti svarīgi	Pedagogs	Vienmēr	Vienmēr	Vienmēr	Dažreiz	Dažreiz	Vienmēr	Bieži	Dažreiz	Vienmēr	Bieži	Bieži	Bieži	Bieži	Dažreiz	Dažreiz	Dažreiz	Dažreiz	Bieži	Dažreiz	Dažreiz	Bieži	Bieži	Vienmēr	Bieži	Vienmēr	Dažreiz	Dažreiz	Bieži	Vienmēr	Bieži	Dažreiz	Bieži	Bieži	Bieži	Bieži
5/14/2025 16:33:51	Latvija	Sieviete	Maģistra grāds	Vairāk nekā 10 gadi	Lielpilsētā, Mazpilsētā	Iekļaujoša (izglītības iestādē tiek īstenotas speciālās izglītības programmas)	6 - 8 gadi	21 - 25 bērni	2 - 4	Vairāk nekā 5 bērniem	Ļoti svarīgi	Drīzāk svarīgi	Drīzāk svarīgi	Pedagogs	Bieži	Vienmēr	Vienmēr	Dažreiz	Bieži	Vienmēr	Bieži	Vienmēr	Bieži	Vienmēr	Bieži	Dažreiz	Dažreiz	Bieži	Dažreiz	Dažreiz	Dažreiz	Bieži	Dažreiz	Bieži	Bieži	Bieži	Bieži	Dažreiz	Bieži	Dažreiz	Dažreiz	Dažreiz	Vienmēr	Dažreiz	Dažreiz	Bieži	Dažreiz	Vienmēr	Bieži
5/14/2025 16:41:48	Latvija	Sieviete	Bakalaura grāds	Vairāk nekā 10 gadi	Lielpilsētā	Iekļaujoša (izglītības iestādē tiek īstenotas speciālās izglītības programmas)	6 - 8 gadi	21 - 25 bērni	2 - 4	1 - 2 bērniem	Ļoti svarīgi	Drīzāk svarīgi	Neitrāli / nav viedokļa	Pedagogs	Bieži	Dažreiz	Bieži	Bieži	Bieži	Dažreiz	Bieži	Dažreiz	Bieži	Bieži	Bieži	Dažreiz	Dažreiz	Bieži	Bieži	Dažreiz	Dažreiz	Bieži	Dažreiz	Dažreiz	Bieži	Dažreiz	Bieži	Bieži	Bieži	Bieži	Nekad	Vienmēr	Vienmēr	Bieži	Vienmēr	Bieži	Dažreiz	Bieži	Dažreiz
5/14/2025 16:50:50	Latvija	Sieviete	Bakalaura grāds	Vairāk nekā 10 gadi	Mazpilsētā	Iekļaujoša (izglītības iestādē tiek īstenotas speciālās izglītības programmas)	Jaukti vecumi	16 - 20 bērni	1 - 2	1 - 2 bērniem	Ļoti svarīgi	Ļoti svarīgi	Drīzāk svarīgi	Pedagogs	Dažreiz	Vienmēr	Vienmēr	Bieži, Vienmēr	Vienmēr	Bieži	Bieži	Vienmēr	Vienmēr	Vienmēr	Bieži	Bieži	Bieži	Vienmēr	Vienmēr	Vienmēr	Bieži	Vienmēr	Bieži	Dažreiz	Bieži	Vienmēr	Vienmēr	Bieži	Vienmēr	Bieži	Dažreiz	Dažreiz	Bieži	Vienmēr	Bieži	Bieži	Vienmēr	Vienmēr	Bieži
5/14/2025 17:44:20	Latvija	Sieviete	Profesionālā augstākā izglītība (1. līmenis), Bakalaura grāds	Vairāk nekā 10 gadi	Mazpilsētā	Neiekļaujoša (izglītības iestādē netiek īstenotas speciālās izglītības programmas)	6 - 8 gadi	21 - 25 bērni	2 - 4	Nevienam	Ļoti svarīgi	Ļoti svarīgi	Ļoti svarīgi	Pedagogs	Vienmēr	Vienmēr	Vienmēr	Vienmēr	Vienmēr	Vienmēr	Vienmēr	Vienmēr	Vienmēr	Vienmēr	Vienmēr	Bieži	Vienmēr	Vienmēr	Vienmēr	Vienmēr	Bieži	Bieži	Nekad	Nekad	Vienmēr	Vienmēr	Vienmēr	Vienmēr	Bieži	Dažreiz, Bieži	Nekad	Vienmēr	Vienmēr	Vienmēr	Vienmēr	Vienmēr	Vienmēr	Bieži	Bieži
5/14/2025 18:27:13	Latvija	Sieviete	Bakalaura grāds	Vairāk nekā 10 gadi	Lielpilsētā	Iekļaujoša (izglītības iestādē tiek īstenotas speciālās izglītības programmas)	3 - 5 gadi	16 - 20 bērni	2 - 4	1 - 2 bērniem	Drīzāk svarīgi	Drīzāk svarīgi	Drīzāk svarīgi	Pedagogs	Bieži	Bieži	Dažreiz	Nekad	Bieži	Bieži	Bieži	Bieži	Dažreiz	Bieži, Vienmēr	Dažreiz	Dažreiz	Bieži	Nekad	Dažreiz	Dažreiz	Nekad	Vienmēr	Dažreiz	Dažreiz	Nekad	Vienmēr	Vienmēr	Bieži	Bieži	Bieži	Nekad	Bieži	Bieži	Bieži	Bieži	Dažreiz	Bieži	Bieži	Nekad
5/14/2025 19:01:08	Latvija	Sieviete	Bakalaura grāds	Vairāk nekā 10 gadi	Mazpilsētā	Neiekļaujoša (izglītības iestādē netiek īstenotas speciālās izglītības programmas)	Jaukti vecumi	26 un vairāk bērni	1 - 2	Nevienam	Ļoti svarīgi	Ļoti svarīgi	Ļoti svarīgi	Pedagogs	Vienmēr	Vienmēr	Vienmēr	Bieži	Vienmēr	Bieži	Bieži	Bieži	Vienmēr	Bieži	Bieži	Bieži	Bieži	Bieži	Bieži	Bieži	Bieži	Bieži	Bieži	Bieži	Bieži	Bieži	Bieži	Bieži	Bieži	Bieži	Dažreiz	Vienmēr	Vienmēr	Bieži	Bieži	Bieži	Bieži	Bieži	Bieži
5/14/2025 19:01:22	Latvija	Sieviete	Bakalaura grāds	Vairāk nekā 10 gadi	Mazpilsētā	Neiekļaujoša (izglītības iestādē netiek īstenotas speciālās izglītības programmas)	Jaukti vecumi	26 un vairāk bērni	1 - 2	Nevienam	Ļoti svarīgi	Ļoti svarīgi	Ļoti svarīgi	Pedagogs	Vienmēr	Vienmēr	Vienmēr	Bieži	Vienmēr	Bieži	Bieži	Bieži	Vienmēr	Bieži	Bieži	Bieži	Bieži	Bieži	Bieži	Bieži	Bieži	Bieži	Bieži	Bieži	Bieži	Bieži	Bieži	Bieži	Bieži	Bieži	Dažreiz	Vienmēr	Vienmēr	Bieži	Bieži	Bieži	Bieži	Bieži	Bieži
5/14/2025 19:11:46	Latvija	Sieviete	Bakalaura grāds	Vairāk nekā 10 gadi	Lielpilsētā	Iekļaujoša (izglītības iestādē tiek īstenotas speciālās izglītības programmas)	6 - 8 gadi	1 - 5 bērni	2 - 4	1 - 2 bērniem	Drīzāk nav svarīgi	Drīzāk nav svarīgi	Drīzāk nav svarīgi	Pedagogs	Dažreiz	Dažreiz	Dažreiz	Dažreiz	Dažreiz	Dažreiz	Bieži	Dažreiz	Dažreiz	Dažreiz	Dažreiz	Dažreiz	Dažreiz	Dažreiz	Dažreiz	Dažreiz	Nekad	Dažreiz	Nekad	Nekad	Nekad	Nekad	Dažreiz	Nekad	Dažreiz	Dažreiz		Dažreiz	Dažreiz	Nekad	Nekad	Nekad	Dažreiz	Dažreiz	Nekad
5/14/2025 20:03:42	Latvija	Sieviete	Bakalaura grāds, Profesionālā augstākā izglītība (2. līmenis)	Vairāk nekā 10 gadi	Lielpilsētā	Iekļaujoša (izglītības iestādē tiek īstenotas speciālās izglītības programmas)	Nav attiecināms	Nav attiecināms	Nav attiecināms	Nav attiecināms	Ļoti svarīgi	Ļoti svarīgi	Ļoti svarīgi	Pedagogs	Bieži, Vienmēr	Bieži	Vienmēr	Vienmēr	Vienmēr	Bieži	Bieži	Bieži	Vienmēr	Bieži	Bieži	Dažreiz	Dažreiz	Bieži	Bieži	Dažreiz	Dažreiz	Bieži	Dažreiz	Dažreiz	Dažreiz	Dažreiz	Bieži	Dažreiz	Bieži	Bieži	Bieži	Bieži	Bieži	Bieži	Bieži	Dažreiz	Bieži	Bieži	Bieži
5/14/2025 20:50:25	Latvija	Sieviete	Bakalaura grāds	Vairāk nekā 10 gadi	Mazpilsētā	Iekļaujoša (izglītības iestādē tiek īstenotas speciālās izglītības programmas)	6 - 8 gadi	16 - 20 bērni	1 - 2	1 - 2 bērniem	Drīzāk svarīgi	Neitrāli / nav viedokļa	Ļoti svarīgi	Pedagogs	Bieži	Bieži	Bieži	Bieži	Bieži	Vienmēr	Vienmēr	Bieži	Dažreiz, Bieži	Bieži	Dažreiz, Bieži	Dažreiz	Bieži	Bieži	Dažreiz	Nekad	Nekad	Dažreiz	Dažreiz	Bieži	Bieži	Nekad	Dažreiz	Dažreiz	Bieži	Dažreiz	Nekad	Dažreiz	Dažreiz	Dažreiz	Dažreiz	Dažreiz	Dažreiz	Nekad	Nekad
5/14/2025 21:29:57	Latvija	Sieviete	Pašlaik iegūst kvalifikāciju	1 - 2 gadi	Lauku apvidū	Neiekļaujoša (izglītības iestādē netiek īstenotas speciālās izglītības programmas)	1 - 3 gadi	16 - 20 bērni	1 - 2	Nevienam	Drīzāk svarīgi	Drīzāk svarīgi	Drīzāk svarīgi	Studējošs pedagogs	Bieži	Bieži	Dažreiz	Dažreiz	Dažreiz	Bieži	Dažreiz	Dažreiz	Bieži	Dažreiz	Bieži	Nekad	Dažreiz	Bieži	Bieži	Bieži	Dažreiz	Bieži	Dažreiz	Dažreiz	Dažreiz	Bieži	Bieži	Dažreiz	Bieži	Bieži	Dažreiz	Bieži	Dažreiz	Dažreiz	Dažreiz	Dažreiz	Dažreiz	Dažreiz	Nekad
5/14/2025 22:02:54	Latvija	Sieviete	Pašlaik iegūst kvalifikāciju	Mazāk par vienu gadu	Mazpilsētā	Iekļaujoša (izglītības iestādē tiek īstenotas speciālās izglītības programmas)	6 - 8 gadi	16 - 20 bērni	1 - 2	1 - 2 bērniem	Ļoti svarīgi	Ļoti svarīgi	Ļoti svarīgi	Studējošs pedagogs	Bieži	Vienmēr	Bieži	Bieži	Dažreiz	Vienmēr	Vienmēr	Vienmēr	Vienmēr	Vienmēr	Vienmēr	Vienmēr	Vienmēr	Vienmēr	Vienmēr	Dažreiz, Bieži	Bieži	Vienmēr	Dažreiz	Dažreiz	Bieži	Bieži	Bieži	Bieži	Bieži	Bieži	Dažreiz	Bieži	Vienmēr	Bieži	Bieži	Vienmēr	Dažreiz	Vienmēr	Vienmēr
5/14/2025 22:24:23	Latvija	Sieviete	Maģistra grāds	Vairāk nekā 10 gadi	Mazpilsētā	Iekļaujoša (izglītības iestādē tiek īstenotas speciālās izglītības programmas)	6 - 8 gadi	16 - 20 bērni	2 - 4	3 - 5 bērniem	Drīzāk svarīgi	Drīzāk svarīgi	Drīzāk svarīgi	Pedagogs	Bieži	Bieži	Bieži	Dažreiz	Bieži	Bieži	Bieži	Bieži	Bieži	Bieži	Bieži	Dažreiz	Bieži	Dažreiz	Bieži	Bieži	Dažreiz	Bieži	Dažreiz	Dažreiz	Bieži	Bieži	Bieži	Dažreiz	Bieži	Bieži	Dažreiz	Dažreiz	Bieži	Bieži	Dažreiz	Bieži	Bieži	Bieži	Bieži
5/14/2025 23:08:07	Latvija	Sieviete	Pašlaik iegūst kvalifikāciju	1 - 2 gadi	Mazpilsētā	Iekļaujoša (izglītības iestādē tiek īstenotas speciālās izglītības programmas)	Jaukti vecumi	26 un vairāk bērni	1 - 2	1 - 2 bērniem	Ļoti svarīgi	Ļoti svarīgi	Ļoti svarīgi	Studējošs pedagogs	Bieži	Bieži	Bieži	Bieži	Bieži	Dažreiz	Bieži	Bieži	Bieži	Dažreiz	Bieži	Dažreiz	Dažreiz	Dažreiz	Dažreiz	Bieži	Dažreiz	Dažreiz	Dažreiz	Dažreiz	Dažreiz	Bieži	Bieži	Bieži	Bieži	Dažreiz	Dažreiz	Dažreiz	Dažreiz	Dažreiz	Dažreiz	Dažreiz	Dažreiz	Dažreiz	Dažreiz
5/15/2025 6:46:49	Latvija	Sieviete	Bakalaura grāds	Vairāk nekā 10 gadi	Lielpilsētā	Iekļaujoša (izglītības iestādē tiek īstenotas speciālās izglītības programmas)	1 - 3 gadi, 3 - 5 gadi, 6 - 8 gadi	26 un vairāk bērni	1 - 2	Nevienam	Drīzāk svarīgi	Drīzāk svarīgi	Drīzāk svarīgi	Pedagogs	Dažreiz	Vienmēr	Vienmēr	Dažreiz	Bieži	Vienmēr	Bieži	Bieži	Bieži	Vienmēr	Vienmēr	Dažreiz	Bieži	Bieži	Bieži	Bieži	Bieži	Bieži	Bieži	Dažreiz	Bieži	Dažreiz	Bieži	Bieži	Bieži	Dažreiz	Dažreiz	Vienmēr	Bieži	Dažreiz	Bieži	Bieži	Bieži	Bieži	Dažreiz
5/15/2025 7:43:28	Latvija	Sieviete	Bakalaura grāds, Profesionālā augstākā izglītība (2. līmenis)	6 - 10 gadi	Lielpilsētā	Iekļaujoša (izglītības iestādē tiek īstenotas speciālās izglītības programmas)	1 - 3 gadi	16 - 20 bērni	1 - 2	Nevienam	Neitrāli / nav viedokļa	Neitrāli / nav viedokļa	Neitrāli / nav viedokļa	Pedagogs	Bieži	Vienmēr	Bieži	Bieži	Dažreiz	Bieži	Bieži	Bieži	Bieži	Bieži	Dažreiz	Dažreiz	Bieži	Dažreiz	Bieži	Bieži	Bieži	Bieži	Dažreiz	Dažreiz	Dažreiz	Dažreiz	Bieži	Dažreiz	Bieži	Dažreiz	Bieži	Bieži	Bieži	Dažreiz	Dažreiz	Dažreiz	Dažreiz	Dažreiz	Dažreiz
5/15/2025 8:02:15	Latvija	Sieviete	Profesionālā augstākā izglītība (1. līmenis)	Vairāk nekā 10 gadi	Lielpilsētā	Iekļaujoša (izglītības iestādē tiek īstenotas speciālās izglītības programmas)	1 - 3 gadi, 3 - 5 gadi, 6 - 8 gadi	16 - 20 bērni	2 - 4	Vairāk nekā 5 bērniem	Ļoti svarīgi	Drīzāk svarīgi	Drīzāk svarīgi	Pedagogs	Bieži	Bieži	Bieži	Bieži	Vienmēr	Vienmēr	Bieži	Vienmēr	Vienmēr	Vienmēr	Vienmēr	Dažreiz	Bieži	Vienmēr	Vienmēr	Bieži	Bieži	Bieži	Dažreiz	Bieži	Bieži	Bieži	Bieži	Bieži	Bieži	Vienmēr	Vienmēr	Bieži	Bieži	Bieži	Bieži	Bieži	Dažreiz	Bieži	Dažreiz
5/15/2025 8:12:59	Latvija	Sieviete	Bakalaura grāds	Vairāk nekā 10 gadi	Lauku apvidū	Iekļaujoša (izglītības iestādē tiek īstenotas speciālās izglītības programmas)	1 - 3 gadi	11 - 15 bērni	1 - 2	Nevienam	Ļoti svarīgi	Ļoti svarīgi	Ļoti svarīgi	Pedagogs	Vienmēr	Vienmēr	Vienmēr	Vienmēr	Vienmēr	Vienmēr	Bieži	Vienmēr	Vienmēr	Vienmēr	Vienmēr	Bieži	Vienmēr	Bieži	Vienmēr	Vienmēr	Bieži	Vienmēr	Vienmēr	Vienmēr	Bieži	Vienmēr	Vienmēr	Vienmēr	Vienmēr	Vienmēr	Vienmēr	Vienmēr	Vienmēr	Vienmēr	Vienmēr	Vienmēr	Vienmēr	Vienmēr	Vienmēr
5/15/2025 8:47:28	Latvija	Sieviete	Profesionālā augstākā izglītība (1. līmenis)	3 - 5 gadi	Lauku apvidū	Nav attiecināms	Jaukti vecumi	6 - 10 bērni	1 - 2	Nevienam	Ļoti svarīgi	Ļoti svarīgi	Ļoti svarīgi	Pedagogs	Vienmēr	Vienmēr	Vienmēr	Vienmēr	Vienmēr	Vienmēr	Vienmēr	Vienmēr	Vienmēr	Vienmēr	Vienmēr	Vienmēr	Vienmēr	Vienmēr	Bieži, Vienmēr	Bieži	Bieži, Vienmēr	Vienmēr	Dažreiz, Bieži	Dažreiz	Bieži	Bieži	Bieži	Bieži	Bieži	Bieži	Bieži	Bieži	Bieži	Bieži	Bieži	Bieži	Bieži	Bieži	Bieži
5/15/2025 8:55:24	Latvija	Sieviete	Profesionālā augstākā izglītība (2. līmenis)	Vairāk nekā 10 gadi	Lielpilsētā	Iekļaujoša (izglītības iestādē tiek īstenotas speciālās izglītības programmas)	6 - 8 gadi	16 - 20 bērni	1 - 2	Nevienam	Ļoti svarīgi	Ļoti svarīgi	Ļoti svarīgi	Pedagogs	Vienmēr	Vienmēr	Vienmēr	Vienmēr	Vienmēr	Vienmēr	Vienmēr	Vienmēr	Vienmēr	Dažreiz	Bieži	Bieži	Bieži	Bieži	Vienmēr	Bieži	Bieži	Vienmēr	Bieži	Bieži	Vienmēr	Bieži	Bieži	Bieži	Dažreiz	Vienmēr	Vienmēr	Vienmēr	Vienmēr	Vienmēr	Bieži	Vienmēr	Vienmēr	Vienmēr	Bieži
5/15/2025 12:08:52	Latvija	Sieviete	Maģistra grāds	Vairāk nekā 10 gadi	Lielpilsētā	Neiekļaujoša (izglītības iestādē netiek īstenotas speciālās izglītības programmas)	Nav attiecināms	Nav attiecināms	Nav attiecināms	Nav attiecināms	Ļoti svarīgi	Ļoti svarīgi	Ļoti svarīgi	Pedagogs	Bieži	Vienmēr	Vienmēr	Vienmēr	Bieži	Bieži	Bieži	Bieži	Bieži	Bieži	Bieži	Bieži	Bieži	Bieži	Bieži	Bieži	Vienmēr	Vienmēr	Vienmēr	Vienmēr	Vienmēr	Bieži	Vienmēr	Bieži	Vienmēr	Bieži	Bieži	Vienmēr	Vienmēr	Vienmēr	Vienmēr	Bieži	Bieži	Vienmēr	Vienmēr
5/15/2025 12:57:25	Latvija	Sieviete	Bakalaura grāds	Vairāk nekā 10 gadi	Mazpilsētā	Iekļaujoša (izglītības iestādē tiek īstenotas speciālās izglītības programmas)	3 - 5 gadi	21 - 25 bērni	2 - 4	Nevienam	Ļoti svarīgi	Ļoti svarīgi	Ļoti svarīgi	Pedagogs	Vienmēr	Vienmēr	Vienmēr	Bieži	Vienmēr	Vienmēr	Bieži	Vienmēr	Vienmēr	Vienmēr	Bieži	Vienmēr	Bieži	Bieži	Bieži	Bieži	Dažreiz	Bieži	Dažreiz	Dažreiz	Bieži	Bieži	Bieži	Bieži	Bieži	Bieži	Dažreiz	Dažreiz	Vienmēr	Bieži	Bieži	Bieži	Dažreiz	Bieži	Dažreiz
5/15/2025 13:26:17	Latvija	Sieviete	Bakalaura grāds	Vairāk nekā 10 gadi	Mazpilsētā	Iekļaujoša (izglītības iestādē tiek īstenotas speciālās izglītības programmas)	Jaukti vecumi	26 un vairāk bērni	1 - 2	3 - 5 bērniem	Ļoti svarīgi	Ļoti svarīgi	Ļoti svarīgi	Pedagogs	Vienmēr	Vienmēr	Vienmēr	Vienmēr	Vienmēr	Vienmēr	Bieži	Vienmēr	Vienmēr	Bieži	Bieži	Dažreiz	Dažreiz	Dažreiz	Dažreiz	Dažreiz	Dažreiz	Vienmēr	Dažreiz	Dažreiz	Dažreiz	Bieži	Bieži	Bieži	Bieži	Bieži	Dažreiz	Bieži	Vienmēr	Vienmēr	Vienmēr	Vienmēr	Vienmēr	Vienmēr	Vienmēr
5/15/2025 17:22:18	Latvija	Sieviete	Profesionālā augstākā izglītība (1. līmenis)	Vairāk nekā 10 gadi	Lauku apvidū	Iekļaujoša (izglītības iestādē tiek īstenotas speciālās izglītības programmas)	3 - 5 gadi	16 - 20 bērni	1 - 2	Nevienam	Ļoti svarīgi	Ļoti svarīgi	Ļoti svarīgi	Pedagogs	Vienmēr	Bieži	Bieži	Dažreiz	Vienmēr	Vienmēr	Bieži	Vienmēr	Vienmēr	Vienmēr	Dažreiz	Nekad	Bieži	Nekad	Bieži, Vienmēr	Dažreiz	Vienmēr	Vienmēr	Dažreiz	Dažreiz	Vienmēr	Bieži	Bieži	Bieži	Vienmēr	Dažreiz	Nekad	Bieži	Bieži	Vienmēr	Dažreiz	Dažreiz	Dažreiz	Dažreiz	Dažreiz
5/16/2025 8:17:25	Latvija	Sieviete	Profesionālā augstākā izglītība (1. līmenis)	Vairāk nekā 10 gadi	Mazpilsētā	Iekļaujoša (izglītības iestādē tiek īstenotas speciālās izglītības programmas)	6 - 8 gadi	16 - 20 bērni	2 - 4	3 - 5 bērniem	Drīzāk svarīgi	Drīzāk nav svarīgi	Drīzāk nav svarīgi	Pedagogs	Vienmēr	Bieži	Dažreiz	Bieži	Bieži	Vienmēr	Bieži	Vienmēr	Bieži	Vienmēr	Vienmēr	Bieži	Bieži	Bieži	Bieži	Bieži	Bieži	Bieži	Bieži	Bieži	Bieži	Bieži	Bieži	Bieži	Bieži	Bieži	Bieži	Bieži	Bieži	Bieži	Bieži	Bieži	Bieži	Bieži	Dažreiz
5/16/2025 9:03:03	Latvija	Sieviete	Maģistra grāds	Vairāk nekā 10 gadi	Mazpilsētā	Iekļaujoša (izglītības iestādē tiek īstenotas speciālās izglītības programmas)	Jaukti vecumi	16 - 20 bērni	2 - 4	1 - 2 bērniem	Drīzāk svarīgi	Drīzāk svarīgi	Drīzāk svarīgi	Pedagogs	Bieži	Bieži	Bieži	Bieži	Bieži	Bieži	Bieži	Bieži	Bieži	Bieži	Bieži	Bieži	Bieži	Bieži	Bieži	Bieži	Bieži	Bieži	Bieži	Bieži	Bieži	Bieži	Bieži	Bieži	Bieži	Bieži	Bieži	Bieži	Bieži	Bieži	Bieži	Bieži	Bieži	Bieži	Bieži
5/16/2025 9:32:16	Latvija	Sieviete	Maģistra grāds	Vairāk nekā 10 gadi	Mazpilsētā	Iekļaujoša (izglītības iestādē tiek īstenotas speciālās izglītības programmas)	6 - 8 gadi	26 un vairāk bērni	5 un vairāk	Vairāk nekā 5 bērniem	Ļoti svarīgi	Ļoti svarīgi	Ļoti svarīgi	Pedagogs	Bieži	Vienmēr	Bieži	Bieži	Bieži	Bieži	Bieži	Bieži	Vienmēr	Bieži	Vienmēr	Bieži	Bieži	Vienmēr	Vienmēr	Vienmēr	Bieži	Vienmēr	Bieži	Bieži	Vienmēr	Vienmēr	Bieži	Bieži	Bieži	Bieži	Dažreiz	Bieži	Vienmēr	Bieži	Dažreiz	Bieži	Dažreiz	Bieži	Bieži
5/16/2025 11:55:30	Latvija	Sieviete	Profesionālā augstākā izglītība (1. līmenis), Bakalaura grāds	3 - 5 gadi	Mazpilsētā	Nav attiecināms	6 - 8 gadi	21 - 25 bērni	1 - 2	Nevienam	Ļoti svarīgi	Ļoti svarīgi	Ļoti svarīgi	Pedagogs	Bieži	Bieži	Bieži	Bieži	Bieži	Bieži	Bieži	Bieži	Bieži	Dažreiz	Dažreiz	Dažreiz	Bieži	Bieži	Bieži	Dažreiz	Bieži	Bieži	Dažreiz	Dažreiz	Bieži	Dažreiz	Bieži	Bieži	Bieži	Bieži	Dažreiz	Bieži	Bieži	Bieži	Dažreiz	Bieži	Bieži	Bieži	Bieži
5/16/2025 21:55:01	Latvija	Sieviete	Profesionālā augstākā izglītība (1. līmenis)	3 - 5 gadi	Mazpilsētā	Iekļaujoša (izglītības iestādē tiek īstenotas speciālās izglītības programmas)	6 - 8 gadi	21 - 25 bērni	1 - 2	1 - 2 bērniem	Drīzāk svarīgi	Drīzāk svarīgi	Drīzāk svarīgi	Studējošs pedagogs	Bieži	Bieži	Bieži	Bieži	Bieži	Vienmēr	Bieži	Bieži	Bieži	Bieži	Dažreiz	Bieži	Bieži	Nekad	Bieži	Dažreiz	Nekad	Bieži	Dažreiz	Dažreiz	Bieži	Bieži	Bieži	Bieži	Vienmēr	Bieži	Bieži	Bieži	Vienmēr	Bieži	Dažreiz	Bieži	Bieži	Bieži	Bieži
5/18/2025 10:28:46	Latvija	Sieviete	Pašlaik iegūst kvalifikāciju	3 - 5 gadi	Lielpilsētā	Iekļaujoša (izglītības iestādē tiek īstenotas speciālās izglītības programmas)	3 - 5 gadi	21 - 25 bērni	2 - 4	1 - 2 bērniem	Ļoti svarīgi	Ļoti svarīgi	Ļoti svarīgi	Studējošs pedagogs	Bieži	Vienmēr	Bieži	Nekad	Bieži	Bieži	Bieži	Bieži	Bieži	Bieži	Bieži	Bieži	Bieži	Dažreiz	Bieži	Dažreiz	Dažreiz	Dažreiz	Dažreiz	Dažreiz	Nekad	Bieži	Bieži	Bieži	Bieži	Dažreiz	Dažreiz	Bieži	Vienmēr	Bieži	Bieži	Bieži	Bieži	Bieži	Bieži
5/18/2025 14:49:33	Latvija	Sieviete	Bakalaura grāds	Vairāk nekā 10 gadi	Mazpilsētā	Iekļaujoša (izglītības iestādē tiek īstenotas speciālās izglītības programmas)	3 - 5 gadi	21 - 25 bērni	2 - 4	Nevienam	Ļoti svarīgi	Ļoti svarīgi	Ļoti svarīgi	Pedagogs	Dažreiz	Bieži	Bieži	Dažreiz	Vienmēr	Bieži	Dažreiz	Bieži	Bieži	Dažreiz	Dažreiz	Dažreiz	Bieži	Nekad	Bieži	Dažreiz	Nekad	Bieži	Nekad	Nekad	Nekad	Dažreiz	Bieži	Dažreiz	Bieži	Dažreiz	Nekad	Dažreiz	Bieži	Dažreiz	Nekad	Dažreiz	Dažreiz	Nekad	Nekad
5/18/2025 16:07:19	Latvija	Sieviete	Pašlaik iegūst kvalifikāciju	3 - 5 gadi	Mazpilsētā	Nav attiecināms	6 - 8 gadi	11 - 15 bērni	1 - 2	Nevienam	Drīzāk svarīgi	Drīzāk svarīgi	Ļoti svarīgi	Students
5/18/2025 17:16:17	Latvija	Sieviete	Pašlaik iegūst kvalifikāciju	1 - 2 gadi	Nav attiecināms	Iekļaujoša (izglītības iestādē tiek īstenotas speciālās izglītības programmas)	3 - 5 gadi	21 - 25 bērni	1 - 2	1 - 2 bērniem	Drīzāk svarīgi	Drīzāk svarīgi	Neitrāli / nav viedokļa	Pedagogs	Bieži	Dažreiz	Bieži	Bieži	Dažreiz, Bieži	Vienmēr	Bieži	Bieži	Vienmēr	Dažreiz	Dažreiz	Nekad	Dažreiz	Bieži	Bieži	Dažreiz	Nekad	Dažreiz	Nekad	Nekad	Dažreiz	Bieži	Bieži	Dažreiz	Dažreiz	Dažreiz	Nekad	Bieži	Bieži	Dažreiz	Nekad	Bieži	Nekad	Dažreiz	Bieži
5/20/2025 23:06:41	Latvija	Sieviete	Bakalaura grāds	3 - 5 gadi	Lauku apvidū	Iekļaujoša (izglītības iestādē tiek īstenotas speciālās izglītības programmas)	3 - 5 gadi, 6 - 8 gadi	11 - 15 bērni	1 - 2	1 - 2 bērniem	Ļoti svarīgi	Drīzāk nav svarīgi	Neitrāli / nav viedokļa	Pedagogs	Dažreiz	Bieži	Bieži	Dažreiz	Bieži	Vienmēr	Bieži	Vienmēr	Vienmēr	Bieži	Dažreiz	Dažreiz	Dažreiz	Bieži	Vienmēr	Bieži	Dažreiz	Bieži	Dažreiz	Dažreiz	Dažreiz	Vienmēr	Vienmēr	Dažreiz	Bieži	Dažreiz	Dažreiz	Dažreiz	Bieži	Dažreiz	Dažreiz	Bieži	Dažreiz	Dažreiz	Bieži
5/22/2025 13:55:37	Latvija	Sieviete	Profesionālā augstākā izglītība (1. līmenis)	Vairāk nekā 10 gadi	Lauku apvidū	Iekļaujoša (izglītības iestādē tiek īstenotas speciālās izglītības programmas)	Jaukti vecumi	16 - 20 bērni	1 - 2	3 - 5 bērniem	Ļoti svarīgi	Ļoti svarīgi	Ļoti svarīgi	Pedagogs	Bieži	Vienmēr	Vienmēr	Dažreiz	Vienmēr	Bieži	Bieži	Vienmēr	Bieži	Bieži	Vienmēr	Bieži	Bieži	Bieži	Vienmēr	Vienmēr	Bieži	Vienmēr	Dažreiz	Vienmēr	Bieži	Vienmēr	Vienmēr	Vienmēr	Vienmēr	Dažreiz	Dažreiz	Bieži	Bieži	Vienmēr	Bieži	Bieži	Bieži	Bieži	Vienmēr
5/23/2025 14:47:40	Latvija	Sieviete	Profesionālā augstākā izglītība (1. līmenis)	Vairāk nekā 10 gadi	Lauku apvidū	Iekļaujoša (izglītības iestādē tiek īstenotas speciālās izglītības programmas)	1 - 3 gadi	16 - 20 bērni	1 - 2	Nevienam	Ļoti svarīgi	Ļoti svarīgi	Ļoti svarīgi	Pedagogs	Bieži	Bieži	Bieži	Bieži		Bieži	Bieži	Bieži	Bieži	Bieži	Bieži	Bieži	Bieži	Dažreiz	Dažreiz	Dažreiz	Bieži	Bieži	Dažreiz	Dažreiz	Dažreiz	Dažreiz	Bieži	Bieži	Bieži	Dažreiz	Bieži	Bieži	Vienmēr	Bieži	Bieži	Bieži	Dažreiz	Dažreiz	Dažreiz
5/27/2025 13:51:43	Latvija	Sieviete	Profesionālā augstākā izglītība (1. līmenis)	3 - 5 gadi	Mazpilsētā	Iekļaujoša (izglītības iestādē tiek īstenotas speciālās izglītības programmas)	1 - 3 gadi	11 - 15 bērni	1 - 2	Nevienam	Ļoti svarīgi	Ļoti svarīgi	Ļoti svarīgi	Pedagogs	Bieži	Bieži	Bieži	Bieži	Bieži	Bieži	Bieži	Bieži, Vienmēr	Bieži	Bieži	Bieži	Bieži	Bieži	Dažreiz	Dažreiz	Bieži	Bieži	Bieži	Dažreiz	Dažreiz	Bieži	Dažreiz, Bieži	Dažreiz	Bieži	Bieži	Bieži	Bieži	Bieži	Bieži	Bieži	Bieži	Bieži	Bieži	Bieži	Bieži
5/29/2025 11:46:20	Latvija	Sieviete	Bakalaura grāds	Vairāk nekā 10 gadi	Mazpilsētā	Iekļaujoša (izglītības iestādē tiek īstenotas speciālās izglītības programmas)	3 - 5 gadi	16 - 20 bērni	2 - 4	1 - 2 bērniem	Drīzāk svarīgi	Drīzāk svarīgi	Drīzāk svarīgi	Pedagogs	Bieži	Bieži	Bieži	Bieži	Bieži	Bieži	Bieži	Bieži	Bieži	Bieži	Bieži	Bieži	Bieži	Bieži	Bieži	Bieži	Bieži	Bieži	Dažreiz	Bieži	Bieži	Bieži	Bieži	Bieži	Bieži	Bieži	Bieži	Bieži	Bieži	Bieži	Bieži	Bieži	Bieži	Bieži	Bieži
5/30/2025 6:26:19	Latvija	Sieviete	Profesionālā augstākā izglītība (1. līmenis), Bakalaura grāds	Vairāk nekā 10 gadi	Lauku apvidū	Neiekļaujoša (izglītības iestādē netiek īstenotas speciālās izglītības programmas)	3 - 5 gadi	11 - 15 bērni	1 - 2	3 - 5 bērniem	Ļoti svarīgi	Ļoti svarīgi		Pedagogs	Vienmēr	Vienmēr	Dažreiz	Dažreiz	Bieži	Bieži	Bieži	Bieži	Vienmēr	Bieži	Vienmēr	Vienmēr	Vienmēr	Vienmēr	Vienmēr	Dažreiz, Bieži	Nekad	Bieži	Vienmēr	Bieži	Bieži	Dažreiz	Bieži		Vienmēr	Dažreiz	Dažreiz	Bieži	Bieži	Bieži	Dažreiz	Dažreiz	Bieži	Bieži	Dažreiz
5/30/2025 21:59:17	Latvija	Sieviete	Bakalaura grāds	Vairāk nekā 10 gadi	Lauku apvidū	Iekļaujoša (izglītības iestādē tiek īstenotas speciālās izglītības programmas)	3 - 5 gadi	16 - 20 bērni	2 - 4	Nevienam	Ļoti svarīgi	Ļoti svarīgi	Ļoti svarīgi	Pedagogs	Bieži	Bieži	Bieži	Dažreiz	Bieži	Bieži	Bieži	Dažreiz	Bieži	Bieži	Dažreiz	Dažreiz	Bieži	Dažreiz	Bieži	Bieži	Dažreiz	Vienmēr	Dažreiz	Dažreiz	Vienmēr	Vienmēr	Bieži	Dažreiz	Vienmēr	Dažreiz	Nekad	Bieži	Vienmēr	Vienmēr	Dažreiz	Bieži	Dažreiz	Bieži	Dažreiz
6/17/2025 20:14:26	Latvija	Sieviete	Pašlaik iegūst kvalifikāciju	Vairāk nekā 10 gadi	Lielpilsētā	Iekļaujoša (izglītības iestādē tiek īstenotas speciālās izglītības programmas)	6 - 8 gadi	16 - 20 bērni	2 - 4	Nevienam	Drīzāk svarīgi	Neitrāli / nav viedokļa	Drīzāk svarīgi	Studējošs pedagogs	Bieži	Bieži	Bieži	Bieži	Bieži	Bieži	Bieži	Bieži	Bieži	Bieži	Bieži	Bieži	Bieži	Bieži	Bieži	Dažreiz	Bieži	Bieži	Dažreiz	Dažreiz	Bieži	Bieži	Bieži	Bieži	Bieži	Bieži	Dažreiz	Bieži	Bieži	Dažreiz	Dažreiz	Bieži	Bieži	Bieži	Dažreiz
9/29/2025 11:10:25	Latvija	Sieviete	Pašlaik iegūst kvalifikāciju	3 - 5 gadi	Lielpilsētā, Mazpilsētā	Nav attiecināms	Jaukti vecumi	Nav attiecināms	Nav attiecināms	Nav attiecināms	Ļoti svarīgi	Ļoti svarīgi	Ļoti svarīgi	Students
9/29/2025 11:10:48	Latvija	Sieviete	Pašlaik iegūst kvalifikāciju, Bakalaura grāds	1 - 2 gadi, 6 - 10 gadi	Lielpilsētā	Neiekļaujoša (izglītības iestādē netiek īstenotas speciālās izglītības programmas)	1 - 3 gadi	11 - 15 bērni	1 - 2	Nevienam	Ļoti svarīgi	Ļoti svarīgi	Ļoti svarīgi	Studējošs pedagogs	Bieži	Bieži	Bieži	Vienmēr	Bieži	Bieži	Bieži	Bieži	Bieži	Bieži	Bieži	Bieži	Bieži	Dažreiz, Bieži	Bieži	Dažreiz	Dažreiz	Bieži	Nekad	Bieži	Bieži	Bieži	Bieži	Bieži	Bieži	Bieži	Bieži	Bieži	Bieži	Bieži	Bieži	Bieži	Bieži	Dažreiz	Dažreiz
9/29/2025 14:37:02	Latvija	Sieviete	Pašlaik iegūst kvalifikāciju	1 - 2 gadi	Mazpilsētā	Iekļaujoša (izglītības iestādē tiek īstenotas speciālās izglītības programmas)	1 - 3 gadi	16 - 20 bērni	1 - 2	Nevienam	Ļoti svarīgi	Ļoti svarīgi	Ļoti svarīgi	Studējošs pedagogs	Vienmēr	Bieži, Vienmēr	Bieži	Vienmēr	Bieži	Bieži	Bieži, Vienmēr	Bieži	Bieži	Bieži	Vienmēr	Dažreiz, Bieži	Vienmēr	Bieži	Vienmēr	Bieži	Dažreiz	Bieži	Dažreiz	Dažreiz	Dažreiz	Dažreiz	Bieži	Dažreiz	Bieži	Bieži	Nekad, Dažreiz	Bieži	Bieži	Bieži	Vienmēr	Bieži	Dažreiz	Bieži	Bieži
9/29/2025 15:29:44	Latvija	Sieviete	Bakalaura grāds	Vairāk nekā 10 gadi	Lielpilsētā	Iekļaujoša (izglītības iestādē tiek īstenotas speciālās izglītības programmas)	6 - 8 gadi	16 - 20 bērni	1 - 2	Nevienam	Ļoti svarīgi	Ļoti svarīgi	Ļoti svarīgi	Studējošs pedagogs	Vienmēr	Vienmēr	Vienmēr	Vienmēr	Bieži	Bieži	Bieži	Bieži	Vienmēr	Bieži	Vienmēr	Bieži	Bieži	Bieži	Bieži	Dažreiz, Bieži	Dažreiz	Bieži	Bieži	Bieži	Vienmēr	Bieži	Vienmēr	Vienmēr	Bieži	Bieži	Bieži	Vienmēr	Bieži	Vienmēr	Bieži	Bieži	Vienmēr	Bieži	Vienmēr
10/1/2025 14:43:44	Latvija	Sieviete	Pašlaik iegūst kvalifikāciju	3 - 5 gadi	Mazpilsētā	Iekļaujoša (izglītības iestādē tiek īstenotas speciālās izglītības programmas)	Jaukti vecumi	6 - 10 bērni	1 - 2	Nav attiecināms	Ļoti svarīgi	Ļoti svarīgi	Ļoti svarīgi	Studējošs pedagogs	Vienmēr	Bieži	Bieži	Bieži	Bieži	Bieži	Dažreiz	Dažreiz	Bieži	Vienmēr	Vienmēr	Bieži	Bieži	Bieži	Bieži	Bieži	Bieži	Bieži	Dažreiz	Bieži	Bieži	Bieži	Bieži	Bieži	Bieži	Bieži	Bieži	Dažreiz	Dažreiz	Bieži	Bieži	Bieži	Bieži	Bieži	Bieži
10/1/2025 19:53:23	Latvija	Sieviete	Pašlaik iegūst kvalifikāciju	Nav pieredzes	Mazpilsētā	Neiekļaujoša (izglītības iestādē netiek īstenotas speciālās izglītības programmas)	3 - 5 gadi	11 - 15 bērni	1 - 2	Nav attiecināms	Ļoti svarīgi	Ļoti svarīgi	Drīzāk svarīgi	Students
10/1/2025 20:03:31	Latvija	Sieviete	Bakalaura grāds	Mazāk par vienu gadu	Lielpilsētā	Iekļaujoša (izglītības iestādē tiek īstenotas speciālās izglītības programmas)	1 - 3 gadi	6 - 10 bērni, 11 - 15 bērni	1 - 2	Nevienam	Drīzāk svarīgi	Neitrāli / nav viedokļa	Drīzāk svarīgi	Studējošs pedagogs	Vienmēr	Vienmēr	Vienmēr	Bieži	Bieži	Bieži	Bieži	Vienmēr	Dažreiz, Bieži	Bieži	Bieži	Bieži	Bieži	Bieži	Bieži	Bieži	Vienmēr	Bieži	Bieži	Bieži	Bieži	Bieži	Bieži	Bieži	Bieži	Bieži	Bieži	Bieži	Bieži	Bieži	Bieži	Bieži	Bieži	Bieži	Bieži
10/1/2025 20:37:03	Latvija	Sieviete	Pašlaik iegūst kvalifikāciju	Nav pieredzes	Mazpilsētā, Lauku apvidū	Nav attiecināms	Nav attiecināms	Nav attiecināms	Nav attiecināms	Nav attiecināms	Ļoti svarīgi	Ļoti svarīgi	Ļoti svarīgi	Students
10/1/2025 21:01:46	Portugāle	Sieviete	Profesionālā augstākā izglītība (1. līmenis)	Nav pieredzes	Mazpilsētā	Iekļaujoša (izglītības iestādē tiek īstenotas speciālās izglītības programmas)	Nav attiecināms	Nav attiecināms	Nav attiecināms	Nav attiecināms	Ļoti svarīgi	Ļoti svarīgi	Ļoti svarīgi	Students
10/1/2025 21:12:38	Latvija	Sieviete	Pašlaik iegūst kvalifikāciju	3 - 5 gadi	Nav attiecināms	Neiekļaujoša (izglītības iestādē netiek īstenotas speciālās izglītības programmas)	Jaukti vecumi	11 - 15 bērni	1 - 2	Nevienam	Drīzāk svarīgi	Neitrāli / nav viedokļa	Drīzāk svarīgi	Studējošs pedagogs	Bieži	Bieži	Vienmēr	Dažreiz	Bieži	Vienmēr	Bieži	Bieži	Vienmēr	Bieži	Bieži	Dažreiz	Dažreiz	Bieži	Vienmēr	Bieži	Dažreiz	Bieži	Dažreiz	Nekad	Bieži	Dažreiz	Bieži	Bieži	Vienmēr	Bieži	Nekad	Dažreiz	Vienmēr	Dažreiz	Dažreiz	Bieži	Dažreiz	Dažreiz	Dažreiz
10/4/2025 18:26:07	Latvija	Sieviete	Pašlaik iegūst kvalifikāciju	6 - 10 gadi	Lauku apvidū	Neiekļaujoša (izglītības iestādē netiek īstenotas speciālās izglītības programmas)	3 - 5 gadi	16 - 20 bērni	2 - 4	Nevienam	Ļoti svarīgi	Drīzāk svarīgi	Ļoti svarīgi	Students
10/5/2025 18:15:01	Latvija	Sieviete	Pašlaik iegūst kvalifikāciju	Mazāk par vienu gadu	Lielpilsētā	Iekļaujoša (izglītības iestādē tiek īstenotas speciālās izglītības programmas)	1 - 3 gadi	11 - 15 bērni	1 - 2	Nevienam	Drīzāk svarīgi	Neitrāli / nav viedokļa	Drīzāk svarīgi	Studējošs pedagogs	Vienmēr	Bieži	Bieži	Dažreiz	Bieži	Bieži	Bieži	Vienmēr	Vienmēr	Bieži	Dažreiz	Bieži	Bieži	Dažreiz	Dažreiz	Dažreiz	Dažreiz	Bieži	Dažreiz	Dažreiz	Dažreiz	Dažreiz	Dažreiz	Bieži	Dažreiz	Bieži	Dažreiz	Bieži	Vienmēr	Dažreiz	Dažreiz	Bieži	Dažreiz	Bieži	Bieži
10/5/2025 19:31:03	Latvija	Sieviete	Pašlaik iegūst kvalifikāciju, Profesionālā augstākā izglītība (1. līmenis)	Mazāk par vienu gadu	Lielpilsētā	Neiekļaujoša (izglītības iestādē netiek īstenotas speciālās izglītības programmas)	3 - 5 gadi	16 - 20 bērni	2 - 4	Nevienam	Ļoti svarīgi	Drīzāk svarīgi	Drīzāk svarīgi	Studējošs pedagogs	Bieži	Bieži	Vienmēr	Dažreiz	Vienmēr	Dažreiz	Bieži	Dažreiz	Bieži	Bieži	Bieži	Nekad	Dažreiz	Dažreiz	Bieži	Bieži	Nekad	Bieži	Bieži	Bieži	Bieži	Dažreiz	Bieži	Dažreiz	Dažreiz	Dažreiz	Bieži	Dažreiz	Vienmēr	Bieži	Bieži	Bieži	Bieži	Bieži	Nekad
10/11/2025 7:05:32	Latvija	Sieviete	Pašlaik iegūst kvalifikāciju	Nav pieredzes	Mazpilsētā	Iekļaujoša (izglītības iestādē tiek īstenotas speciālās izglītības programmas)	3 - 5 gadi	16 - 20 bērni	2 - 4	1 - 2 bērniem	Ļoti svarīgi	Ļoti svarīgi	Ļoti svarīgi	Students
10/20/2025 12:49:37	Latvija	Sieviete	Bakalaura grāds	Vairāk nekā 10 gadi	Lauku apvidū	Nav attiecināms	Jaukti vecumi	Nav attiecināms	1 - 2	1 - 2 bērniem	Drīzāk svarīgi	Drīzāk svarīgi	Drīzāk svarīgi	Students
[truncated: 41 more columns]
