# Supplementary material
Source: Research Square preprint supplement (doi:10.21203/rs.3.rs-9452587/v1)
Supplement: Supplementary file 2 [file 2e74771b6fdef6d3e719a98f.pdf]

# Inquérito sobre a garantia de uma educação inclusiva através dos princípios do Desenho Universal para a Aprendizagem (DUA)

Obrigado por concordar em preencher este inquérito! O nosso objetivo é compreender como os princípios do Desenho Universal para a Aprendizagem (DUA) são aplicados para promover um ambiente educativo inclusivo. O objetivo desta investigação é avaliar a qualidade da educação pré-escolar inclusiva na Áustria, na República Checa, na Letónia e em Portugal, com base nos princípios do DUA, e avaliar a compreensão dos educadores sobre as práticas eficazes. As suas respostas serão anónimas e não recolheremos qualquer informação pessoal que o/a possa identificar. As informações recolhidas serão utilizadas exclusivamente para fins de investigação e serão agregadas às respostas de outros participantes. Espera-se que o preenchimento do inquérito demore cerca de 1 a 20 minutos. A sua opinião é crucial para nós e ajudará a melhorar a experiência educativa das crianças em idade pré-escolar.

*\*Norāda nepieciešamo jautājumu*

## 1. Dados demográficos

### 1. 1.1. País/ Land/ Země/ País \*

*Atzīmējiet visus atbilstošos variantus.*

- Österreich
- República Checa
- Latvija
- Portugal
- Outros

### 2. 1.2. Género \*

*Atzīmējiet visus atbilstošos variantus.*

- Feminino
- Masculino
- Prefere não responder

**3. 1.3. Qual é o seu nível de formação académica mais elevado? \***

*Atzīmējiet visus atbilstošos variantus.*

- Atualmente a frequentar um curso de qualificação
- Ensino superior profissional (nível 1)
- Bacharelato
- Ensino superior profissional (nível 2)
- Mestrado
- Grau de doutoramento

**4. 1.4. Experiência profissional (em anos): \***

*Atzīmējiet visus atbilstošos variantus.*

- Sem experiência
- Menos de um ano
- 1 - 2 anos
- 3 - 5 anos
- 6 - 10 anos
- Mais de 10 anos

**5. 1.5. Local de trabalho: \***

*Atzīmējiet visus atbilstošos variantus.*

- Numa área metropolitana
- Numa pequena cidade
- Numa zona rural
- Não aplicável

6. **1.6. Como avalia a instituição de educação pré-escolar em que trabalha no que respeita à implementação de práticas de educação inclusiva?**

*Atzīmējiet visus atbilstošos variantus.*

- Inclusiva (a instituição implementa medidas de suporte à aprendizagem e à inclusão)
- Não-inclusiva (a instituição não implementa medidas de suporte à aprendizagem e à inclusão)
- Não aplicável

7. **1.7. Faixa etária das crianças com quem trabalha diariamente:**

*Atzīmējiet visus atbilstošos variantus.*

- 0 - 12 meses
- 1 - 3 anos
- 3 - 5 anos
- 6 - 8 anos
- Grupos etários mistos
- Não aplicável

8. **1.8. Quantas crianças estão atualmente inscritas no seu grupo de educação pré-escolar?**

*Atzīmējiet visus atbilstošos variantus.*

- 1 - 5 crianças
- 6 - 10 crianças
- 11 - 15 crianças
- 16 - 20 crianças
- 21 - 25 crianças
- 26 ou mais crianças
- Não aplicável

**9. 1.9. Quantos professores e auxiliares trabalham diariamente no seu grupo?**

*Atzīmējiet visus atbilstošos variantus.*

- 1 - 2
- 2 - 4
- 5 ou mais
- Não aplicável

**10. 1.10. Quantas crianças do seu grupo beneficiam de medidas de apoio à aprendizagem e à inclusão?**

*Atzīmējiet visus atbilstošos variantus.*

- Nenhum
- 1 - 2 crianças
- 3 - 5 crianças
- Mais de 5 crianças
- Não aplicável

11. **1.11. Avalie a importância dos seguintes aspetos baseados nos princípios do Desenho Universal para a Aprendizagem na promoção de um ambiente de aprendizagem inclusivo:**

*Atzīmējiet visus atbilstošos variantus.*

|                                                                               | Não é importante         | Sim não importa          | Neutro, sem opinião      | Bastante importante      | Muito importante         |
|-------------------------------------------------------------------------------|--------------------------|--------------------------|--------------------------|--------------------------|--------------------------|
| <b>Envolver as crianças em atividades através de diversos métodos</b>         | <input type="checkbox"/> |
| <b>Apresentar informações utilizando uma variedade de materiais</b>           | <input type="checkbox"/> |
| <b>Exprimir e avaliar os conhecimentos adquiridos através de vários meios</b> | <input type="checkbox"/> |

12. **1.12. Para responder às perguntas da secção seguinte e avaliar os métodos e estratégias de ensino abrangidos pelos princípios do DUA, indique as suas qualificações atuais:**

*Atzīmējiet tikai vienu variantu.*

- Educador/Educadora de Infância *Pārejiet uz 13. jautājumu*
- Estudante *Pārejiet uz 24. jautājumu*
- Educador/Educadora de Infância em formação *Pārejiet uz 13. jautājumu*

Avaliação dos princípios da DUA para Educadores/Educadoras de Infância

**2. Utilização de vários métodos de envolvimento**

Por favor, avalie com que frequência utiliza os seguintes métodos de envolvimento no ambiente do ensino pré-escolar:

## 13. 2.1. Interesses e identidades do acolhimento:

*Atzīmējiet visus atbilstošos variantus.*

|                                                                                                                                                                                                                                                                                                    | Nunca                    | Por vezes                | Frequentemente           | Sempre                   |
|----------------------------------------------------------------------------------------------------------------------------------------------------------------------------------------------------------------------------------------------------------------------------------------------------|--------------------------|--------------------------|--------------------------|--------------------------|
| <b>2.1.1. Seleção de objetivos e tarefas de aprendizagem com base nos interesses específicos das crianças, no contexto cultural, no género, na faixa etária e nas capacidades (por exemplo, oferecendo opções para representar os resultados em formato de desenho, escultura, vídeo ou áudio)</b> | <input type="checkbox"/> | <input type="checkbox"/> | <input type="checkbox"/> | <input type="checkbox"/> |
| <b>2.1.2. Atividades baseadas no jogo e em experiências práticas (por exemplo, jogos de papéis e visitas de estudo em vários ambientes - no interior e no exterior)</b>                                                                                                                            | <input type="checkbox"/> | <input type="checkbox"/> | <input type="checkbox"/> | <input type="checkbox"/> |
| <b>2.1.3. Promoção do prazer nas atividades e tarefas realizadas (por exemplo, aproveitar as surpresas ou descobertas durante as atividades)</b>                                                                                                                                                   | <input type="checkbox"/> | <input type="checkbox"/> | <input type="checkbox"/> | <input type="checkbox"/> |
| <b>2.1.4. Criação de um ambiente que reconheça as várias necessidades emocionais e sensoriais da criança (por exemplo, explorando diferentes ideias e questões e fornecendo auscultadores com cancelamento de ruído ou iluminação ajustada)</b>                                                    | <input type="checkbox"/> | <input type="checkbox"/> | <input type="checkbox"/> | <input type="checkbox"/> |

## 14. 2.2. Esforço sustentado e persistência

*Atzīmējiet visus atbilstošos variantus.*

|                                                                                                                                                                                   | Nunca                    | Por vezes                | Frequentemente           | Sempre                   |
|-----------------------------------------------------------------------------------------------------------------------------------------------------------------------------------|--------------------------|--------------------------|--------------------------|--------------------------|
| <b>2.2.1. Explicar o objetivo das atividades (por exemplo, dizer às crianças por que razão estão a aprender sobre a partilha através de jogos de tabuleiro e de dramatização)</b> | <input type="checkbox"/> | <input type="checkbox"/> | <input type="checkbox"/> | <input type="checkbox"/> |
| <b>2.2.2. Proporcionar vários níveis de desafio (por exemplo, oferecer tarefas de dificuldade e complexidade diferentes para níveis de competências variáveis)</b>                | <input type="checkbox"/> | <input type="checkbox"/> | <input type="checkbox"/> | <input type="checkbox"/> |
| <b>2.2.3. Promover o trabalho em equipa (por exemplo, incentivar as crianças a trabalharem em conjunto em projetos ou tarefas)</b>                                                | <input type="checkbox"/> | <input type="checkbox"/> | <input type="checkbox"/> | <input type="checkbox"/> |
| <b>2.2.4. Fomentar um sentimento de pertença (por exemplo, partilhar experiências relacionadas com os conceitos que estão a ser aprendidos)</b>                                   | <input type="checkbox"/> | <input type="checkbox"/> | <input type="checkbox"/> | <input type="checkbox"/> |
| <b>2.2.5. Dar feedback específico e prático (por exemplo, dizer a uma criança: "Gosto da forma como partilhaste os teus brinquedos com o teu amigo!")</b>                         | <input type="checkbox"/> | <input type="checkbox"/> | <input type="checkbox"/> | <input type="checkbox"/> |

## 15. 2.3. Capacidade emocional

*Atzīmējiet visus atbilstošos variantus.*

|                                                                                                                                                                                                                         | Nunca                    | Por vezes                | Frequentemente           | Sempre                   |
|-------------------------------------------------------------------------------------------------------------------------------------------------------------------------------------------------------------------------|--------------------------|--------------------------|--------------------------|--------------------------|
| <b>2.3.1. Consciência das expetativas das crianças e promoção da motivação nas atividades (por exemplo, identificar o que poderão ler quando aprenderem a ler ou qual será a recompensa por completarem uma tarefa)</b> | <input type="checkbox"/> | <input type="checkbox"/> | <input type="checkbox"/> | <input type="checkbox"/> |
| <b>2.3.2. Desenvolver a capacidade de exprimir emoções e de se auto-regular (por exemplo, exprimir emoções utilizando emojis ou aprender respostas comportamentais através de jogos de papéis)</b>                      | <input type="checkbox"/> | <input type="checkbox"/> | <input type="checkbox"/> | <input type="checkbox"/> |
| <b>2.3.3. Avaliar o auto-desempenho e o progresso (por exemplo, criar gráficos para registar o número de letras aprendidas ou símbolos adquiridos durante um período específico)</b>                                    | <input type="checkbox"/> | <input type="checkbox"/> | <input type="checkbox"/> | <input type="checkbox"/> |
| <b>2.3.4. Modelar a empatia através de debates e de jogos de papéis (por exemplo, utilizar debates ou jogos de papéis para promover a compreensão empática)</b>                                                         | <input type="checkbox"/> | <input type="checkbox"/> | <input type="checkbox"/> | <input type="checkbox"/> |

## 3. Utilização de vários instrumentos de representação

Por favor, avalie com que frequência utiliza os seguintes instrumentos de representação no ambiente da educação pré-escolar:

**16. 3.1. Perceção***Atzīmējiet visus atbilstošos variantus.*

|                                                                                                                                                    | Nunca                    | Por vezes                | Frequentemente           | Sempre                   |
|----------------------------------------------------------------------------------------------------------------------------------------------------|--------------------------|--------------------------|--------------------------|--------------------------|
| <b>3.1.1. Adaptar a representação da informação (por exemplo, ferramentas digitais com ajustes de tamanho de letra e contraste de cor)</b>         | <input type="checkbox"/> | <input type="checkbox"/> | <input type="checkbox"/> | <input type="checkbox"/> |
| <b>3.1.2. Fornecer informações utilizando vários formatos (por exemplo, utilizando vídeos, materiais áudio e atividades de movimento)</b>          | <input type="checkbox"/> | <input type="checkbox"/> | <input type="checkbox"/> | <input type="checkbox"/> |
| <b>3.1.3. Representar o tema de uma forma autêntica (por exemplo, contar histórias sobre diferentes línguas e culturas num contexto histórico)</b> | <input type="checkbox"/> | <input type="checkbox"/> | <input type="checkbox"/> | <input type="checkbox"/> |

## 17. 3.2. Língua e símbolos

*Atzīmējiet visus atbilstošos variantus.*

|                                                                                                                                                                                     | Nunca                    | Por vezes                | Frequentemente           | Sempre                   |
|-------------------------------------------------------------------------------------------------------------------------------------------------------------------------------------|--------------------------|--------------------------|--------------------------|--------------------------|
| <b>3.2.1. Promover a compreensão de palavras, símbolos e números em vários formatos (por exemplo, criar gráficos e tabelas)</b>                                                     | <input type="checkbox"/> | <input type="checkbox"/> | <input type="checkbox"/> | <input type="checkbox"/> |
| <b>3.2.2. Melhorar a compreensão dos símbolos e dos números através de atividades práticas</b>                                                                                      | <input type="checkbox"/> | <input type="checkbox"/> | <input type="checkbox"/> | <input type="checkbox"/> |
| <b>3.2.3. Refletir conceitos através de diferentes culturas, línguas e dialetos (por exemplo, explicar conceitos em várias línguas e símbolos)</b>                                  | <input type="checkbox"/> | <input type="checkbox"/> | <input type="checkbox"/> | <input type="checkbox"/> |
| <b>3.2.4. Eliminar estereótipos sobre diferentes línguas e meios de comunicação (por exemplo, aprender símbolos e ferramentas expressivas, palavras e frases em várias línguas)</b> | <input type="checkbox"/> | <input type="checkbox"/> | <input type="checkbox"/> | <input type="checkbox"/> |
| <b>3.2.5. Representar o tema através de vários meios de representação (por exemplo, através de vídeos, gráficos e atividades interativas)</b>                                       | <input type="checkbox"/> | <input type="checkbox"/> | <input type="checkbox"/> | <input type="checkbox"/> |

### 18. 3.3. Construir conhecimento

*Atzīmējiet visus atbilstošos variantus.*

|                                                                                                                                                                                     | Nunca                    | Por vezes                | Frequentemente           | Sempre                   |
|-------------------------------------------------------------------------------------------------------------------------------------------------------------------------------------|--------------------------|--------------------------|--------------------------|--------------------------|
| <b>3.3.1. Ligar os conhecimentos existentes e adquiridos (por exemplo, ligar os conhecimentos existentes sobre organismos vivos a ecossistemas específicos)</b>                     | <input type="checkbox"/> | <input type="checkbox"/> | <input type="checkbox"/> | <input type="checkbox"/> |
| <b>3.3.2. Comparar conceitos e relações essenciais (por exemplo, comparar características de animais)</b>                                                                           | <input type="checkbox"/> | <input type="checkbox"/> | <input type="checkbox"/> | <input type="checkbox"/> |
| <b>3.3.3. Reconhecer interesses e identidades diversas (por exemplo, desenhar bandeiras diferentes ou comparar várias cores de olhos/cabelos)</b>                                   | <input type="checkbox"/> | <input type="checkbox"/> | <input type="checkbox"/> | <input type="checkbox"/> |
| <b>3.3.4. Relacionar tópicos e generalizar conceitos (por exemplo, aprender sobre sinais de trânsito durante um passeio ou explorar diferentes raças, cores e tamanhos de cães)</b> | <input type="checkbox"/> | <input type="checkbox"/> | <input type="checkbox"/> | <input type="checkbox"/> |

### 4. Utilização de múltiplos meios de ação e de expressão

Por favor, avalie com que frequência utiliza os seguintes meios de ação e expressão no ambiente da educação pré-escolar:

## 19. 4.1. Interação

*Atzīmējiet visus atbilstošos variantus.*

|                                                                                                                                                                                              | Nunca                    | Por vezes                | Frequentemente           | Sempre                   |
|----------------------------------------------------------------------------------------------------------------------------------------------------------------------------------------------|--------------------------|--------------------------|--------------------------|--------------------------|
| <b>4.1.1. Assegurar o acesso e a previsibilidade em vários ambientes (por exemplo, utilizando pistas tácteis, auditivas, simbólicas e coloridas no ambiente da criança)</b>                  | <input type="checkbox"/> | <input type="checkbox"/> | <input type="checkbox"/> | <input type="checkbox"/> |
| <b>4.1.2. Proporcionar o acesso a materiais e ferramentas (por exemplo, utilizar auscultadores com cancelamento de ruído, luvas de jardinagem e ferramentas de comunicação alternativas)</b> | <input type="checkbox"/> | <input type="checkbox"/> | <input type="checkbox"/> | <input type="checkbox"/> |

## 20. 4.2. Expressão e comunicação

*Atzīmējiet visus atbilstošos variantus.*

|                                                                                                                                                                     | Nunca                    | Por vezes                | Frequentemente           | Sempre                   |
|---------------------------------------------------------------------------------------------------------------------------------------------------------------------|--------------------------|--------------------------|--------------------------|--------------------------|
| <b>4.2.1. Utilização de vários meios de comunicação (por exemplo, permitir que as crianças expressem as suas ideias através da arte, da música ou do movimento)</b> | <input type="checkbox"/> | <input type="checkbox"/> | <input type="checkbox"/> | <input type="checkbox"/> |
| <b>4.2.2. Fornecer vários materiais (por exemplo, utilizar diferentes materiais na realização de tarefas)</b>                                                       | <input type="checkbox"/> | <input type="checkbox"/> | <input type="checkbox"/> | <input type="checkbox"/> |
| <b>4.2.3. Prestar apoio e reduzi-lo gradualmente (por exemplo, utilizando apoio físico verbal e visual que é gradualmente diminuído)</b>                            | <input type="checkbox"/> | <input type="checkbox"/> | <input type="checkbox"/> | <input type="checkbox"/> |
| <b>4.2.4. Utilização de vários instrumentos de fala e de expressão (por exemplo, diferentes línguas ou métodos de comunicação alternativos)</b>                     | <input type="checkbox"/> | <input type="checkbox"/> | <input type="checkbox"/> | <input type="checkbox"/> |

## 21. 4.3. Desenvolvimento de estratégias

*Atzīmējiet visus atbilstošos variantus.*

|                                                                                                                                                                                                | Nunca                    | Por vezes                | Frequentemente           | Sempre                   |
|------------------------------------------------------------------------------------------------------------------------------------------------------------------------------------------------|--------------------------|--------------------------|--------------------------|--------------------------|
| <b>4.3.1. Estabelecer objetivos significativos em conjunto com as crianças (por exemplo, estabelecer objetivos para aprender três palavras novas numa semana através de várias atividades)</b> | <input type="checkbox"/> | <input type="checkbox"/> | <input type="checkbox"/> | <input type="checkbox"/> |
| <b>4.3.2. Antecipar desafios em atividades (por exemplo, planear uma visita à biblioteca e antecipar potenciais dificuldades no caminho ou na biblioteca)</b>                                  | <input type="checkbox"/> | <input type="checkbox"/> | <input type="checkbox"/> | <input type="checkbox"/> |
| <b>4.3.3. Organizar recursos e informações (por exemplo, etiquetar materiais e mobiliário)</b>                                                                                                 | <input type="checkbox"/> | <input type="checkbox"/> | <input type="checkbox"/> | <input type="checkbox"/> |
| <b>4.3.4. Autoavaliação dos progressos ou autorreflexão sobre as competências adquiridas (por exemplo, utilização de gráficos ou tabelas para conceitos, letras e ideias aprendidos)</b>       | <input type="checkbox"/> | <input type="checkbox"/> | <input type="checkbox"/> | <input type="checkbox"/> |
| <b>4.3.5. Promover práticas inclusivas (por exemplo, explorar vários feriados ou tradições culturais)</b>                                                                                      | <input type="checkbox"/> | <input type="checkbox"/> | <input type="checkbox"/> | <input type="checkbox"/> |

## 5. Oportunidades para a utilização de métodos e estratégias de ensino abrangidos pelos princípios DUA

22. **5.1. Que desafios enfrenta ao tentar incorporar várias estratégias e métodos de envolvimento, representação ou ação e expressão?**

*Atzīmējiet visus atbilstošos variantus.*

- Falta de recursos
- Conhecimentos ou oportunidades de formação limitados
- Restrições de tempo
- Resistência dos colegas ou da instituição de ensino
- Citas: \_\_\_\_\_

23. **5.2. Que oportunidades específicas de desenvolvimento de competências profissionais ou de apoio recebeu em relação à aquisição de métodos e estratégias indicados nos princípios do DUA para promover práticas educativas inclusivas?**

*Atzīmējiet visus atbilstošos variantus.*

- Conhecimentos adquiridos nos programas de estudo
- Ensino formal (cursos, seminários) para melhorar as competências profissionais
- Aprendizagem autónoma através de recursos como livros, cursos online ou investigação
- Conhecimentos adquiridos através da colaboração com colegas, pessoal de apoio ou profissionais de outras áreas
- Nenhum conhecimento relevante
- Citas: \_\_\_\_\_

### Avaliação dos princípios do DUA para os alunos

#### 2. Utilização de vários métodos de envolvimento

Avalie com que frequência os seguintes métodos de envolvimento devem ser utilizados no ambiente da educação pré-escolar:

## 24. 2.1. Interesses e identidades do acolhimento:

*Atzīmējiet visus atbilstošos variantus.*

|                                                                                                                                                                                                                                                                                                     | Nunca                    | Por vezes                | Frequentemente           | Sempre                   |
|-----------------------------------------------------------------------------------------------------------------------------------------------------------------------------------------------------------------------------------------------------------------------------------------------------|--------------------------|--------------------------|--------------------------|--------------------------|
| <b>2.1.1. Seleção de objectivos e tarefas de aprendizagem com base nos interesses específicos das crianças, no contexto cultural, no género, na faixa etária e nas capacidades (por exemplo, oferecendo opções para representar os resultados em formato de desenho, escultura, vídeo ou áudio)</b> | <input type="checkbox"/> | <input type="checkbox"/> | <input type="checkbox"/> | <input type="checkbox"/> |
| <b>2.1.2. Actividades baseadas no jogo e em experiências práticas (por exemplo, jogos de papéis e visitas de estudo em vários ambientes - no interior e no exterior)</b>                                                                                                                            | <input type="checkbox"/> | <input type="checkbox"/> | <input type="checkbox"/> | <input type="checkbox"/> |
| <b>2.1.3. Promover o prazer nas actividades e tarefas realizadas (por exemplo, utilizar surpresas ou descobertas durante as actividades)</b>                                                                                                                                                        | <input type="checkbox"/> | <input type="checkbox"/> | <input type="checkbox"/> | <input type="checkbox"/> |
| <b>2.1.4. Criar um ambiente que reconheça as várias necessidades emocionais e sensoriais da criança (por exemplo, explorando diferentes ideias e questões e fornecendo auscultadores com cancelamento de ruído ou iluminação ajustada)</b>                                                          | <input type="checkbox"/> | <input type="checkbox"/> | <input type="checkbox"/> | <input type="checkbox"/> |

## 25. 2.2. Esforço sustentado e persistência

*Atzīmējiet visus atbilstošos variantus.*

|                                                                                                                                                                                    | Nunca                    | Por vezes                | Frequentemente           | Sempre                   |
|------------------------------------------------------------------------------------------------------------------------------------------------------------------------------------|--------------------------|--------------------------|--------------------------|--------------------------|
| <b>2.2.1. Explicar o objetivo das actividades (por exemplo, dizer às crianças por que razão estão a aprender sobre a partilha através de jogos de tabuleiro e de dramatização)</b> | <input type="checkbox"/> | <input type="checkbox"/> | <input type="checkbox"/> | <input type="checkbox"/> |
| <b>2.2.2. Proporcionar vários níveis de desafio (por exemplo, oferecer tarefas de dificuldade e complexidade diferentes para níveis de competências variáveis)</b>                 | <input type="checkbox"/> | <input type="checkbox"/> | <input type="checkbox"/> | <input type="checkbox"/> |
| <b>2.2.3. Promover o trabalho em equipa (por exemplo, incentivar as crianças a trabalharem em conjunto em projectos ou tarefas)</b>                                                | <input type="checkbox"/> | <input type="checkbox"/> | <input type="checkbox"/> | <input type="checkbox"/> |
| <b>2.2.4. Fomentar um sentimento de pertença (por exemplo, partilhar experiências relacionadas com os conceitos que estão a ser aprendidos)</b>                                    | <input type="checkbox"/> | <input type="checkbox"/> | <input type="checkbox"/> | <input type="checkbox"/> |
| <b>2.2.5. Dar opinião específico e prático (por exemplo, dizer a uma criança: "Gosto da forma como partilhaste os teus brinquedos com o teu amigo!")</b>                           | <input type="checkbox"/> | <input type="checkbox"/> | <input type="checkbox"/> | <input type="checkbox"/> |

## 26. 2.3. Capacidade emocional

*Atzīmējiet visus atbilstošos variantus.*

|                                                                                                                                                                                                                           | Nunca                    | Por vezes                | Frequentemente           | Sempre                   |
|---------------------------------------------------------------------------------------------------------------------------------------------------------------------------------------------------------------------------|--------------------------|--------------------------|--------------------------|--------------------------|
| <b>2.3.1. Consciência das expectativas das crianças e promoção da motivação nas actividades (por exemplo, identificar o que poderão ler quando aprenderem a ler ou qual será a recompensa por completarem uma tarefa)</b> | <input type="checkbox"/> | <input type="checkbox"/> | <input type="checkbox"/> | <input type="checkbox"/> |
| <b>2.3.2. Desenvolver a capacidade de exprimir emoções e de se auto-regular (por exemplo, exprimir emoções utilizando emojis ou aprender respostas comportamentais através de jogos de papéis)</b>                        | <input type="checkbox"/> | <input type="checkbox"/> | <input type="checkbox"/> | <input type="checkbox"/> |
| <b>2.3.3. Avaliar o auto-desempenho e o progresso (por exemplo, criar gráficos para registar o número de letras aprendidas ou símbolos adquiridos durante um período específico)</b>                                      | <input type="checkbox"/> | <input type="checkbox"/> | <input type="checkbox"/> | <input type="checkbox"/> |
| <b>2.3.4. Modelar a empatia através de debates e de jogos de papéis (por exemplo, utilizar debates ou jogos de papéis para promover a compreensão empática)</b>                                                           | <input type="checkbox"/> | <input type="checkbox"/> | <input type="checkbox"/> | <input type="checkbox"/> |

## 3. Utilização de vários instrumentos de representação

Avalie com que frequência os seguintes instrumentos de representação devem ser utilizados no ambiente da educação pré-escolar:

**27. 3.1. Perceção***Atzīmējiet visus atbilstošos variantus.*

|                                                                                                                                                    | Nunca                    | Por vezes                | Frequentemente           | Sempre                   |
|----------------------------------------------------------------------------------------------------------------------------------------------------|--------------------------|--------------------------|--------------------------|--------------------------|
| <b>3.1.1. Adaptar a representação da informação (por exemplo, ferramentas digitais com ajustes de tamanho de letra e contraste de cor)</b>         | <input type="checkbox"/> | <input type="checkbox"/> | <input type="checkbox"/> | <input type="checkbox"/> |
| <b>3.1.2. Fornecer informações utilizando vários formatos (por exemplo, utilizando vídeos, materiais áudio e actividades de movimento)</b>         | <input type="checkbox"/> | <input type="checkbox"/> | <input type="checkbox"/> | <input type="checkbox"/> |
| <b>3.1.3. Representar o tema de uma forma autêntica (por exemplo, contar histórias sobre diferentes línguas e culturas num contexto histórico)</b> | <input type="checkbox"/> | <input type="checkbox"/> | <input type="checkbox"/> | <input type="checkbox"/> |

## 28. 3.2. Língua e símbolos

*Atzīmējiet visus atbilstošos variantus.*

|                                                                                                                                                                                      | Nunca                    | Por vezes                | Frequentemente           | Sempre                   |
|--------------------------------------------------------------------------------------------------------------------------------------------------------------------------------------|--------------------------|--------------------------|--------------------------|--------------------------|
| <b>3.2.1. Promover a compreensão de palavras, símbolos e números em vários formatos (por exemplo, criar gráficos e tabelas)</b>                                                      | <input type="checkbox"/> | <input type="checkbox"/> | <input type="checkbox"/> | <input type="checkbox"/> |
| <b>3.2.2. Melhorar a compreensão dos símbolos e dos números através de actividades práticas</b>                                                                                      | <input type="checkbox"/> | <input type="checkbox"/> | <input type="checkbox"/> | <input type="checkbox"/> |
| <b>3.2.3. Refletir conceitos através de diferentes culturas, línguas e dialectos (por exemplo, explicar conceitos em várias línguas e símbolos)</b>                                  | <input type="checkbox"/> | <input type="checkbox"/> | <input type="checkbox"/> | <input type="checkbox"/> |
| <b>3.2.4. Eliminar estereótipos sobre diferentes línguas e meios de comunicação (por exemplo, aprender símbolos e ferramentas de expressão, palavras e frases em várias línguas)</b> | <input type="checkbox"/> | <input type="checkbox"/> | <input type="checkbox"/> | <input type="checkbox"/> |
| <b>3.2.5. Representar o tema através de vários meios de representação (por exemplo, através de vídeos, gráficos e actividades interactivas)</b>                                      | <input type="checkbox"/> | <input type="checkbox"/> | <input type="checkbox"/> | <input type="checkbox"/> |

## 29. 3.3. Construir conhecimento

*Atzīmējiet visus atbilstošos variantus.*

|                                                                                                                                                                                     | Nunca                    | Por vezes                | Frequentemente           | Sempre                   |
|-------------------------------------------------------------------------------------------------------------------------------------------------------------------------------------|--------------------------|--------------------------|--------------------------|--------------------------|
| <b>3.3.1. Ligar os conhecimentos existentes e adquiridos (por exemplo, ligar os conhecimentos existentes sobre organismos vivos a ecossistemas específicos)</b>                     | <input type="checkbox"/> | <input type="checkbox"/> | <input type="checkbox"/> | <input type="checkbox"/> |
| <b>3.3.2. Comparar conceitos e relações essenciais (por exemplo, comparar características de animais)</b>                                                                           | <input type="checkbox"/> | <input type="checkbox"/> | <input type="checkbox"/> | <input type="checkbox"/> |
| <b>3.3.3. Reconhecer interesses e identidades diversas (por exemplo, desenhar bandeiras diferentes ou comparar várias cores de olhos/cabelos)</b>                                   | <input type="checkbox"/> | <input type="checkbox"/> | <input type="checkbox"/> | <input type="checkbox"/> |
| <b>3.3.4. Relacionar tópicos e generalizar conceitos (por exemplo, aprender sobre sinais de trânsito durante um passeio ou explorar diferentes raças, cores e tamanhos de cães)</b> | <input type="checkbox"/> | <input type="checkbox"/> | <input type="checkbox"/> | <input type="checkbox"/> |

## 4. Utilização de múltiplos meios de ação e de expressão

Avalie a frequência com que os seguintes meios de ação e expressão devem ser utilizados no ambiente educação pré-escolar:

## 30. 4.1. Interação

*Atzīmējiet visus atbilstošos variantus.*

|                                                                                                                                                                                              | Nunca                    | Por vezes                | Frequentemente           | Sempre                   |
|----------------------------------------------------------------------------------------------------------------------------------------------------------------------------------------------|--------------------------|--------------------------|--------------------------|--------------------------|
| <b>4.1.1. Assegurar o acesso e a previsibilidade em vários ambientes (por exemplo, utilizando pistas tácteis, auditivas, simbólicas e coloridas no ambiente da criança)</b>                  | <input type="checkbox"/> | <input type="checkbox"/> | <input type="checkbox"/> | <input type="checkbox"/> |
| <b>4.1.2. Proporcionar o acesso a materiais e ferramentas (por exemplo, utilizar auscultadores com cancelamento de ruído, luvas de jardinagem e ferramentas de comunicação alternativas)</b> | <input type="checkbox"/> | <input type="checkbox"/> | <input type="checkbox"/> | <input type="checkbox"/> |

## 31. 4.2. Expressão e comunicação

*Atzīmējiet visus atbilstošos variantus.*

|                                                                                                                                                                     | Nunca                    | Por vezes                | Frequentemente           | Sempre                   |
|---------------------------------------------------------------------------------------------------------------------------------------------------------------------|--------------------------|--------------------------|--------------------------|--------------------------|
| <b>4.2.1. Utilização de vários meios de comunicação (por exemplo, permitir que as crianças expressem as suas ideias através da arte, da música ou do movimento)</b> | <input type="checkbox"/> | <input type="checkbox"/> | <input type="checkbox"/> | <input type="checkbox"/> |
| <b>4.2.2. Fornecer vários materiais (por exemplo, utilizar diferentes materiais na realização de tarefas).</b>                                                      | <input type="checkbox"/> | <input type="checkbox"/> | <input type="checkbox"/> | <input type="checkbox"/> |
| <b>4.2.3. Prestar apoio e reduzi-lo gradualmente (por exemplo, utilizando apoio físico verbal e visual que é gradualmente diminuído)</b>                            | <input type="checkbox"/> | <input type="checkbox"/> | <input type="checkbox"/> | <input type="checkbox"/> |
| <b>4.2.4. Utilização de vários instrumentos de fala e de expressão (por exemplo, diferentes línguas ou métodos de comunicação alternativos)</b>                     | <input type="checkbox"/> | <input type="checkbox"/> | <input type="checkbox"/> | <input type="checkbox"/> |

## 32. 4.3. Desenvolvimento de estratégias

*Atzīmējiet visus atbilstošos variantus.*

|                                                                                                                                                                                                   | Nunca                    | Por vezes                | Frequentemente           | Sempre                   |
|---------------------------------------------------------------------------------------------------------------------------------------------------------------------------------------------------|--------------------------|--------------------------|--------------------------|--------------------------|
| <b>4.3.1. Estabelecer objectivos significativos em conjunto com as crianças (por exemplo, estabelecer objectivos para aprender três palavras novas numa semana através de várias actividades)</b> | <input type="checkbox"/> | <input type="checkbox"/> | <input type="checkbox"/> | <input type="checkbox"/> |
| <b>4.3.2. Antecipar desafios em actividades (por exemplo, planear uma visita à biblioteca e antecipar potenciais dificuldades no caminho ou na biblioteca)</b>                                    | <input type="checkbox"/> | <input type="checkbox"/> | <input type="checkbox"/> | <input type="checkbox"/> |
| <b>4.3.3. Organizar recursos e informações (por exemplo, etiquetar materiais e mobiliário)</b>                                                                                                    | <input type="checkbox"/> | <input type="checkbox"/> | <input type="checkbox"/> | <input type="checkbox"/> |
| <b>4.3.4. Autoavaliação dos progressos ou autorreflexão sobre as competências adquiridas (por exemplo, utilização de gráficos ou tabelas para conceitos, letras e ideias aprendidos)</b>          | <input type="checkbox"/> | <input type="checkbox"/> | <input type="checkbox"/> | <input type="checkbox"/> |
| <b>4.3.5. Promover práticas inclusivas (por exemplo, explorar vários feriados ou tradições culturais)</b>                                                                                         | <input type="checkbox"/> | <input type="checkbox"/> | <input type="checkbox"/> | <input type="checkbox"/> |

## 5. Oportunidades para a utilização de métodos e estratégias de ensino abrangidos pelos princípios do DUA

33. **5.1. Que desafios pensa que podem surgir ao tentar incluir várias estratégias e métodos de envolvimento, representação ou ação e expressão no ambiente da educação pré-escolar?**

*Atzīmējiet tikai vienu variantu.*

- Falta de recursos
- Conhecimentos ou oportunidades de formação limitados
- Restrições de tempo
- Resistência dos colegas ou da instituição de ensino

34. **5.2. Que oportunidades de desenvolvimento de competências profissionais ou de apoio seriam necessárias em relação à aquisição de métodos e estratégias descritas nos princípios do DUA para promover práticas educativas inclusivas?**

*Atzīmējiet tikai vienu variantu.*

- Conhecimentos adquiridos nos programas de estudo
- Ensino formal (cursos, seminários) para melhorar as competências profissionais
- Aprendizagem autónoma através de recursos como livros, cursos online ou investigação
- Conhecimentos adquiridos através da colaboração com colegas, pessoal de apoio ou profissionais de outras áreas
- Nenhum conhecimento adicional é necessário

---

Uzņēmums Google nav šī satura autors un to neatbalsta.

Google Veidlapas
