# Supplementary material
Source: Research Square preprint supplement (doi:10.21203/rs.3.rs-9452587/v1)
Supplement: Supplementary file 3 [file 3ac9e804a72b7541dc361aa6.pdf]

# Průzkum o zajištění inkluzivního vzdělávání prostřednictvím zásad Univerzálního Designu pro Učení (UDU)

Děkujeme, že jste souhlasili s vyplněním tohoto průzkumu! Naším cílem je zjistit, jestli jsou principy Univerzálního Designu pro Učení (UDU) uplatňovány při podpoře inkluzivního vzdělávacího prostředí. Cílem tohoto výzkumu je zhodnotit kvalitu inkluzivního předškolního vzdělávání v Rakousku, České republice, Lotyšsku a Portugalsku na základě principů UDU a posoudit, jak pedagogové rozumí efektivním postupům. Vaše odpovědi budou anonymní a nebudeme shromažďovat žádné osobní údaje, které by vás mohly identifikovat. Získané informace budou použity výhradně pro výzkumné účel a budou sloučeny s odpověďmi ostatních účastníků. Předpokládá se, že vyplnění dotazníku zabere přibližně 10-20 minut. Vaše názory jsou pro nás zásadní a pomohou zlepšit vzdělávání dětí předškolního věku.

*\*Norāda nepieciešamo jautājumu*

## 1. Demografické údaje

### 1. 1.1. Země/ Land/ Země/ País \*

*Atzīmējiet visus atbilstošos variantus.*

- Österreich
- Česká republika
- Latvija
- Portugalsko
- Další

### 2. 1.2. Pohlaví \*

*Atzīmējiet visus atbilstošos variantus.*

- Žena
- Muž
- Raději neodpovídat

**3. 1.3. Jaké je vaše nejvyšší dosažené vzdělání? \***

*Atzīmējiet visus atbilstošos variantus.*

- V současné době pokračuji v získávání kvalifikace předškolní pedagog
- Kvalifikace Chůva pro děti v dětské skupině
- Středoškolské vzdělání (úroveň 1)
- Vyšší odborné vzdělání (úroveň 2)
- Bakalářský titul
- Magisterský titul
- Doktorský titul

**4. 1.4. Pracovní zkušenosti v předškolním vzdělávání (v letech): \***

*Atzīmējiet visus atbilstošos variantus.*

- Bez zkušeností
- Méně než jeden rok
- 1 - 2 roky
- 3 - 5 let
- 6 - 10 let
- Více než 10 let

**5. 1.5. Místo výkonu práce: \***

*Atzīmējiet visus atbilstošos variantus.*

- Ve městě
- V malém městě (městys)
- Ve venkovské oblasti
- Jiný

6. **1.6. Jak hodnotíte předškolní vzdělávací zařízení nebo dětskou skupinu, ve kterém pracujete, z hlediska zavádění inkluzivních vzdělávacích postupů?**

*Atzīmējiet visus atbilstošos variantus.*

- Inkluzivní (instituce realizuje speciální vzdělávací programy)
- Neinkluzivní (instituce nerealizuje speciální vzdělávací programy)
- Jiný

7. **1.7. Věková kategorie dětí, se kterými denně pracujete:**

*Atzīmējiet visus atbilstošos variantus.*

- 0 - 12 měsíců
- 1 - 3 roky
- 3 - 5 let
- 6 - 8 let
- Smíšené věkové skupiny
- Jiný

8. **1.8. Kolik dětí je v současné době zapsáno do vaší třídy/skupiny?**

*Atzīmējiet visus atbilstošos variantus.*

- 1 - 5 dětí
- 6 - 10 dětí
- 11 - 15 dětí
- 16 - 20 dětí
- 21 - 25 dětí
- 26 a více dětí
- Jiný

9. **1.9. Kolik učitelů, pomocných učitelů, chův nebo asistentů pracuje denně ve vaší třídě skupině?**

*Atzīmējiet visus atbilstošos variantus.*

- 1 - 2  
 2 - 4  
 5 nebo více  
 Jiný

10. **1.10. Kolik dětí ve vaší třídě/skupině má speciální individuální vzdělávací plán nebo přístup?**

*Atzīmējiet visus atbilstošos variantus.*

- Žádné  
 1 - 2 děti  
 3 - 5 dětí  
 Více než 5 dětí  
 Jiný

11. **1.11. Zhodnoťte význam následujících aspektů založených na univerzálních principech pro učení při podpoře inkluzivního vzdělávacího prostředí:**

*Atzīmējiet visus atbilstošos variantus.*

|                                                                            | Není důležité            | Spíše není důležité      | Neutrální, bez názoru    | Poměrně důležité         | Velmi důležité           |
|----------------------------------------------------------------------------|--------------------------|--------------------------|--------------------------|--------------------------|--------------------------|
| <b>Zapojení dětí do aktivit prostřednictvím různých vzdělávacích metod</b> | <input type="checkbox"/> |
| <b>Prezentace informací pomocí různých materiálů</b>                       | <input type="checkbox"/> |
| <b>Vyjadřování a hodnocení získaných znalostí různými prostředky</b>       | <input type="checkbox"/> |

12. 1.12. **Abyste mohli odpovědět na otázky v následující části a zhodnotit metody a strategie výuky, které využíváte, uveďte prosím svou současnou pozici:**

*Atzīmējjiet tikai vienu variantu.*

- Učitel *Pārejiet uz 13. jautājumu*
- Chůva *Pārejiet uz 13. jautājumu*
- Student *Pārejiet uz 24. jautājumu*
- Učitel před nástupem do zaměstnání *Pārejiet uz 13. jautājumu*

*Pārejiet uz 24. jautājumu*

Hodnocení univerzálních principů pro učení pro učitele a chůvy

## 2. Použití různých metod zapojení

Zhodnoťte, jak často využíváte následující metody zapojení v prostředí předškolního vzdělávání:

## 13. 2.1. Vítané zájmy a podpora identity:

*Atzīmējiet visus atbilstošos variantus.*

|                                                                                                                                                                                                                            | Nikdy                    | Někdy                    | Často                    | Vždy                     |
|----------------------------------------------------------------------------------------------------------------------------------------------------------------------------------------------------------------------------|--------------------------|--------------------------|--------------------------|--------------------------|
| <b>2.1.1. Výběr výukových cílů a úkolů na základě jedinečných zájmů, kulturního kontextu, pohlaví, věkové skupiny a schopností dětí (např. možnost volby zobrazení výsledků v kresbě, soše, videu nebo zvukové podobě)</b> | <input type="checkbox"/> | <input type="checkbox"/> | <input type="checkbox"/> | <input type="checkbox"/> |
| <b>2.1.2. Aktivity založené na hře a praktických zkušenostech (např. hraní rolí a výlety do různých prostředí - venku i uvnitř)</b>                                                                                        | <input type="checkbox"/> | <input type="checkbox"/> | <input type="checkbox"/> | <input type="checkbox"/> |
| <b>2.1.3. Podpora radosti z prováděných činností a úkolů (např. využívání překvapení nebo objevů během činností)</b>                                                                                                       | <input type="checkbox"/> | <input type="checkbox"/> | <input type="checkbox"/> | <input type="checkbox"/> |
| <b>2.1.4. Vytvoření prostředí, které zohledňuje různé emocionální a smyslové potřeby dítěte (např. zkoumání různých myšlenek a otázek a poskytnutí sluchátek s potlačením hluku nebo upraveného osvětlení)</b>             | <input type="checkbox"/> | <input type="checkbox"/> | <input type="checkbox"/> | <input type="checkbox"/> |

## 14. 2.2. Dlouhodobé úsilí a vytrvalost

*Atzīmējiet visus atbilstošos variantus.*

|                                                                                                                                                   | Nikdy                    | Někdy                    | Často                    | Vždy                     |
|---------------------------------------------------------------------------------------------------------------------------------------------------|--------------------------|--------------------------|--------------------------|--------------------------|
| <b>2.2.1. Vysvětlení účelu aktivit (např. vysvětlení, proč se děti učí o sdílení prostřednictvím stolních her a hraní rolí)</b>                   | <input type="checkbox"/> | <input type="checkbox"/> | <input type="checkbox"/> | <input type="checkbox"/> |
| <b>2.2.2. Poskytování různých úrovní náročnosti (např. nabídka úkolů různé obtížnosti a složitosti pro různé úrovně dovedností)</b>               | <input type="checkbox"/> | <input type="checkbox"/> | <input type="checkbox"/> | <input type="checkbox"/> |
| <b>2.2.3. Podpora týmové práce (např. povzbuzování dětí ke společné práci na projektech nebo úkolech)</b>                                         | <input type="checkbox"/> | <input type="checkbox"/> | <input type="checkbox"/> | <input type="checkbox"/> |
| <b>2.2.4. Podpora pocitu sounáležitosti (např. sdílení zkušeností souvisejících s vyučovanými pojmy)</b>                                          | <input type="checkbox"/> | <input type="checkbox"/> | <input type="checkbox"/> | <input type="checkbox"/> |
| <b>2.2.5. Poskytování konkrétní, praktické zpětné vazby (např. když dítěti řeknete: "Líbí se mi, jak ses rozdělil o své hračky s kamarádem!")</b> | <input type="checkbox"/> | <input type="checkbox"/> | <input type="checkbox"/> | <input type="checkbox"/> |

## 15. 2.3. Emocionální kapacita

*Atzīmējiet visus atbilstošos variantus.*

|                                                                                                                                                                                    | Nikdy                    | Někdy                    | Často                    | Vždy                     |
|------------------------------------------------------------------------------------------------------------------------------------------------------------------------------------|--------------------------|--------------------------|--------------------------|--------------------------|
| <b>2.3.1. Uvědomění si očekávání dětí a podpora motivace při činnostech (např. určení, co budou umět přečíst, až se naučí číst a psát, nebo jaká bude odměna za splnění úkolu)</b> | <input type="checkbox"/> | <input type="checkbox"/> | <input type="checkbox"/> | <input type="checkbox"/> |
| <b>2.3.2. Rozvoj schopnosti vyjadřovat emoce a seberegulace (např. vyjadřování emocí pomocí emotikonů nebo učení se reakcím na chování prostřednictvím hraní rolí)</b>             | <input type="checkbox"/> | <input type="checkbox"/> | <input type="checkbox"/> | <input type="checkbox"/> |
| <b>2.3.3. Hodnocení vlastního výkonu a pokroku (např. vytváření tabulek pro sledování počtu naučených písmen nebo symbolů za určité období)</b>                                    | <input type="checkbox"/> | <input type="checkbox"/> | <input type="checkbox"/> | <input type="checkbox"/> |
| <b>2.3.4. Modelování empatie prostřednictvím diskusí a hraní rolí (např. pomocí diskusí nebo hraní rolí podporovat empatické porozumění)</b>                                       | <input type="checkbox"/> | <input type="checkbox"/> | <input type="checkbox"/> | <input type="checkbox"/> |

### 3. Používání různých nástrojů reprezentace

Zhodnoťte prosím, jak často využíváte následující nástroje reprezentace v prostředí předškolního vzdělávání:

## 16. 3.1. Vnímání

*Atzīmējiet visus atbilstošos variantus.*

|                                                                                                                               | Nikdy                    | Někdy                    | Často                    | Vždy                     |
|-------------------------------------------------------------------------------------------------------------------------------|--------------------------|--------------------------|--------------------------|--------------------------|
| <b>3.1.1. Přizpůsobení zobrazení informací (např. digitální nástroje s úpravou velikosti písma a barevného kontrastu)</b>     | <input type="checkbox"/> | <input type="checkbox"/> | <input type="checkbox"/> | <input type="checkbox"/> |
| <b>3.1.2. Poskytování informací různými formami (např. pomocí videí, zvukových materiálů a pohybových aktivit)</b>            | <input type="checkbox"/> | <input type="checkbox"/> | <input type="checkbox"/> | <input type="checkbox"/> |
| <b>3.1.3. Představení tématu autentickým způsobem (např. vyprávění o různých jazycích a kulturách v historickém kontextu)</b> | <input type="checkbox"/> | <input type="checkbox"/> | <input type="checkbox"/> | <input type="checkbox"/> |

## 17. 3.2. Jazyk a symboly

*Atzīmējiet visus atbilstošos variantus.*

|                                                                                                                                                                             | Nikdy                    | Někdy                    | Často                    | Vždy                     |
|-----------------------------------------------------------------------------------------------------------------------------------------------------------------------------|--------------------------|--------------------------|--------------------------|--------------------------|
| <b>3.2.1. Podpora porozumění slovům, symbolům a číslům v různých formátech (např. vytváření grafů a tabulek)</b>                                                            | <input type="checkbox"/> | <input type="checkbox"/> | <input type="checkbox"/> | <input type="checkbox"/> |
| <b>3.2.2. Zlepšení porozumění symbolům a číslům prostřednictvím praktických činností</b>                                                                                    | <input type="checkbox"/> | <input type="checkbox"/> | <input type="checkbox"/> | <input type="checkbox"/> |
| <b>3.2.3. Reflexe pojmů prostřednictvím různých kultur, jazyků a dialektů (např. vysvětlování pojmů v různých jazycích a symbolech)</b>                                     | <input type="checkbox"/> | <input type="checkbox"/> | <input type="checkbox"/> | <input type="checkbox"/> |
| <b>3.2.4. Odstraňování stereotypů o různých jazycích a komunikačních prostředcích (např. učení se symbolům a výrazovým prostředkům, slovům a frázím v různých jazycích)</b> | <input type="checkbox"/> | <input type="checkbox"/> | <input type="checkbox"/> | <input type="checkbox"/> |
| <b>3.2.5. Představení tématu pomocí různých způsobů znázornění (např. pomocí videí, grafů a interaktivních aktivit)</b>                                                     | <input type="checkbox"/> | <input type="checkbox"/> | <input type="checkbox"/> | <input type="checkbox"/> |

## 18. 3.3. Budování znalostí

*Atzīmējiet visus atbilstošos variantus.*

|                                                                                                                                                            | Nikdy                    | Někdy                    | Často                    | Vždy                     |
|------------------------------------------------------------------------------------------------------------------------------------------------------------|--------------------------|--------------------------|--------------------------|--------------------------|
| <b>3.3.1. Propojení stávajících a získaných znalostí (např. propojení stávajících znalostí o živých organismech s konkrétními ekosystémy)</b>              | <input type="checkbox"/> | <input type="checkbox"/> | <input type="checkbox"/> | <input type="checkbox"/> |
| <b>3.3.2. Porovnávání základních pojmů a vztahů (např. porovnávání charakteristických znaků zvířat)</b>                                                    | <input type="checkbox"/> | <input type="checkbox"/> | <input type="checkbox"/> | <input type="checkbox"/> |
| <b>3.3.3. Rozpoznávání různých zájmů a identit (např. kreslení různých vlajek nebo porovnávání různých barev očí a vlasů)</b>                              | <input type="checkbox"/> | <input type="checkbox"/> | <input type="checkbox"/> | <input type="checkbox"/> |
| <b>3.3.4. Vztahování témat a zobecňování pojmů (např. poznávání dopravních značek během procházky nebo zkoumání různých plemen, barev a velikostí psů)</b> | <input type="checkbox"/> | <input type="checkbox"/> | <input type="checkbox"/> | <input type="checkbox"/> |

## 4. Používání více akčních a výrazových prostředků

Zhodnoťte prosím, jak často využíváte v prostředí předškolního vzdělávání následující akční a výrazové prostředky:

## 19. 4.1. Interakce

*Atzīmējiet visus atbilstošos variantus.*

|                                                                                                                                                                   | Nikdy                    | Někdy                    | Často                    | Vždy                     |
|-------------------------------------------------------------------------------------------------------------------------------------------------------------------|--------------------------|--------------------------|--------------------------|--------------------------|
| <b>4.1.1. Zajištění porozumění a předvídatelnosti v různých prostředích (např. pomocí hmatových, sluchových, symbolických a barevných signálů v okolí dítěte)</b> | <input type="checkbox"/> | <input type="checkbox"/> | <input type="checkbox"/> | <input type="checkbox"/> |
| <b>4.1.2. Zajištění přístupu k materiálům a nástrojům (např. sluchátka s potlačením hluku, zahradnické rukavice a alternativní komunikační nástroje)</b>          | <input type="checkbox"/> | <input type="checkbox"/> | <input type="checkbox"/> | <input type="checkbox"/> |

## 20. 4.2. Vyjadřování a komunikace

*Atzīmējiet visus atbilstošos variantus.*

|                                                                                                                                                | Nikdy                    | Někdy                    | Často                    | Vždy                     |
|------------------------------------------------------------------------------------------------------------------------------------------------|--------------------------|--------------------------|--------------------------|--------------------------|
| <b>4.2.1. Využívání různých komunikačních prostředků (např. umožnění dětem vyjádřit své myšlenky prostřednictvím umění, hudby nebo pohybu)</b> | <input type="checkbox"/> | <input type="checkbox"/> | <input type="checkbox"/> | <input type="checkbox"/> |
| <b>4.2.2. Poskytování různých materiálů (např. používání různých materiálů při plnění úkolů)</b>                                               | <input type="checkbox"/> | <input type="checkbox"/> | <input type="checkbox"/> | <input type="checkbox"/> |
| <b>4.2.3. Poskytování podpory a její postupné snižování (např. používání slovní a vizuální fyzické podpory, která se postupně snižuje)</b>     | <input type="checkbox"/> | <input type="checkbox"/> | <input type="checkbox"/> | <input type="checkbox"/> |
| <b>4.2.4. Používání různých řečových a vyjadřovacích prostředků (např. různých jazyků nebo alternativních komunikačních metod)</b>             | <input type="checkbox"/> | <input type="checkbox"/> | <input type="checkbox"/> | <input type="checkbox"/> |

## 21. 4.3. Vývoj strategie

*Atzīmējiet visus atbilstošos variantus.*

|                                                                                                                                                        | Nikdy                    | Někdy                    | Často                    | Vždy                     |
|--------------------------------------------------------------------------------------------------------------------------------------------------------|--------------------------|--------------------------|--------------------------|--------------------------|
| <b>4.3.1. Stanovení smysluplných cílů společně s dětmi (např. stanovení cíle naučit se během týdne tři nová slova prostřednictvím různých aktivit)</b> | <input type="checkbox"/> | <input type="checkbox"/> | <input type="checkbox"/> | <input type="checkbox"/> |
| <b>4.3.2. Předvídání problémů při činnostech (např. plánování návštěvy knihovny a předvídání možných potíží na cestě nebo v knihovně)</b>              | <input type="checkbox"/> | <input type="checkbox"/> | <input type="checkbox"/> | <input type="checkbox"/> |
| <b>4.3.3. Organizace zdrojů a informací (např. označování materiálů a nábytku)</b>                                                                     | <input type="checkbox"/> | <input type="checkbox"/> | <input type="checkbox"/> | <input type="checkbox"/> |
| <b>4.3.4. Sebehodnocení pokroku nebo sebereflexe získaných dovedností (např. používání grafů nebo tabulek pro naučené pojmy, písmena a myšlenky)</b>   | <input type="checkbox"/> | <input type="checkbox"/> | <input type="checkbox"/> | <input type="checkbox"/> |
| <b>4.3.5. Podpora inkluzivních postupů (např. zkoumání různých kulturních svátků nebo tradic)</b>                                                      | <input type="checkbox"/> | <input type="checkbox"/> | <input type="checkbox"/> | <input type="checkbox"/> |

## 5. Možnosti využití výukových metod a strategií univerzálních principů pro inkluzivní uče

## 22. 5.1. Jakým výzvám čelíte, když se snažíte začlenit různé strategie a metody zapojen reprezentace nebo akce a vyjádření

*Atzīmējiet visus atbilstošos variantus.*

- Nedostatek zdrojů
- Omezené znalosti nebo možnosti školení
- Časová omezení
- Odpor kolegů nebo vzdělávací instituce
- Citas: \_\_\_\_\_

23. **5.2. Jaké konkrétní možnosti rozvoje profesních kompetencí nebo podpory jste získali v souvislosti s osvojením metod a strategií uvedených v zásadách UDU pro podporu inkluzivních vzdělávacích postupů?**

*Atzīmējiet visus atbilstošos variantus.*

- Znalosti získané v rámci studijních programů
- Formální vzdělávání (kurzy, semináře) ke zvýšení odborné způsobilosti
- Samostatné učení prostřednictvím zdrojů, jako jsou knihy, online kurzy nebo výzkum.
- Znalosti získané spoluprací s kolegy, podpůrným personálem nebo odborníky z jiných oborů
- Žádné relevantní znalosti
- Citas: \_\_\_\_\_

Hodnocení univerzálních principů pro učení pro studenty

## 2. Použití různých metod zapojení

Zhodnoťte, jak často by měly být v prostředí předškolního vzdělávání využívány následující metody zapojení

## 24. 2.1. Vítané zájmy a podpora identity:

*Atzīmējiet visus atbilstošos variantus.*

|                                                                                                                                                                                                                            | Nikdy                    | Někdy                    | Často                    | Vždy                     |
|----------------------------------------------------------------------------------------------------------------------------------------------------------------------------------------------------------------------------|--------------------------|--------------------------|--------------------------|--------------------------|
| <b>2.1.1. Výběr výukových cílů a úkolů na základě jedinečných zájmů, kulturního kontextu, pohlaví, věkové skupiny a schopností dětí (např. možnost volby zobrazení výsledků v kresbě, soše, videu nebo zvukové podobě)</b> | <input type="checkbox"/> | <input type="checkbox"/> | <input type="checkbox"/> | <input type="checkbox"/> |
| <b>2.1.2. Aktivity založené na hře a praktických zkušenostech (např. hraní rolí a výlety do různých prostředí - venku i uvnitř)</b>                                                                                        | <input type="checkbox"/> | <input type="checkbox"/> | <input type="checkbox"/> | <input type="checkbox"/> |
| <b>2.1.3. Podpora radosti z prováděných činností a úkolů (např. využití překvapení nebo objevů během činností)</b>                                                                                                         | <input type="checkbox"/> | <input type="checkbox"/> | <input type="checkbox"/> | <input type="checkbox"/> |
| <b>2.1.4. Vytvoření prostředí, které zohledňuje různé emocionální a smyslové potřeby dítěte (např. zkoumání různých myšlenek a otázek a poskytnutí sluchátek s potlačením hluku nebo upraveného osvětlení)</b>             | <input type="checkbox"/> | <input type="checkbox"/> | <input type="checkbox"/> | <input type="checkbox"/> |

## 25. 2.2. Dlouhodobé úsilí a vytrvalost

*Atzīmējiet visus atbilstošos variantus.*

|                                                                                                                                                   | Nikdy                    | Někdy                    | Často                    | Vždy                     |
|---------------------------------------------------------------------------------------------------------------------------------------------------|--------------------------|--------------------------|--------------------------|--------------------------|
| <b>2.2.1. Vysvětlení účelu aktivit (např. vysvětlení, proč se děti učí o sdílení prostřednictvím stolních her a hraní rolí)</b>                   | <input type="checkbox"/> | <input type="checkbox"/> | <input type="checkbox"/> | <input type="checkbox"/> |
| <b>2.2.2. Poskytování různých úrovní náročnosti (např. nabídka úkolů různé obtížnosti a složitosti pro různé úrovně dovedností)</b>               | <input type="checkbox"/> | <input type="checkbox"/> | <input type="checkbox"/> | <input type="checkbox"/> |
| <b>2.2.3. Podpora týmové práce (např. povzbuzování dětí ke společné práci na projektech nebo úkolech)</b>                                         | <input type="checkbox"/> | <input type="checkbox"/> | <input type="checkbox"/> | <input type="checkbox"/> |
| <b>2.2.4. Podpora pocitu sounáležitosti (např. sdílení zkušeností souvisejících s vyučovanými pojmy)</b>                                          | <input type="checkbox"/> | <input type="checkbox"/> | <input type="checkbox"/> | <input type="checkbox"/> |
| <b>2.2.5. Poskytování konkrétní, praktické zpětné vazby (např. když dítěti řeknete: "Líbí se mi, jak ses rozdělil o své hračky s kamarádem!")</b> | <input type="checkbox"/> | <input type="checkbox"/> | <input type="checkbox"/> | <input type="checkbox"/> |

## 26. 2.3. Emocionální kapacita

*Atzīmējiet visus atbilstošos variantus.*

|                                                                                                                                                                                    | Nikdy                    | Někdy                    | Často                    | Vždy                     |
|------------------------------------------------------------------------------------------------------------------------------------------------------------------------------------|--------------------------|--------------------------|--------------------------|--------------------------|
| <b>2.3.1. Uvědomění si očekávání dětí a podpora motivace při činnostech (např. určení, co budou umět přečíst, až se naučí číst a psát, nebo jaká bude odměna za splnění úkolu)</b> | <input type="checkbox"/> | <input type="checkbox"/> | <input type="checkbox"/> | <input type="checkbox"/> |
| <b>2.3.2. Rozvoj schopnosti vyjadřovat emoce a seberegulace (např. vyjadřování emocí pomocí emotikonů nebo učení se reakcím na chování prostřednictvím hraní rolí)</b>             | <input type="checkbox"/> | <input type="checkbox"/> | <input type="checkbox"/> | <input type="checkbox"/> |
| <b>2.3.3. Hodnocení vlastního výkonu a pokroku (např. vytváření tabulek pro sledování počtu naučených písmen nebo symbolů za určité období)</b>                                    | <input type="checkbox"/> | <input type="checkbox"/> | <input type="checkbox"/> | <input type="checkbox"/> |
| <b>2.3.4. Modelování empatie prostřednictvím diskusí a hraní rolí (např. pomocí diskusí nebo hraní rolí podporovat empatické porozumění)</b>                                       | <input type="checkbox"/> | <input type="checkbox"/> | <input type="checkbox"/> | <input type="checkbox"/> |

### 3. Používání různých nástrojů reprezentace

Zhodnoťte, jak často by měly být v prostředí předškolního vzdělávání využívány následující reprezentační nástroje:

## 27. 3.1. Vnímání

*Atzīmējiet visus atbilstošos variantus.*

|                                                                                                                               | Nikdy                    | Někdy                    | Často                    | Vždy                     |
|-------------------------------------------------------------------------------------------------------------------------------|--------------------------|--------------------------|--------------------------|--------------------------|
| <b>3.1.1. Přizpůsobení zobrazení informací (např. digitální nástroje s úpravou velikosti písma a barevného kontrastu)</b>     | <input type="checkbox"/> | <input type="checkbox"/> | <input type="checkbox"/> | <input type="checkbox"/> |
| <b>3.1.2. Poskytování informací různými formáty (např. pomocí videí, zvukových materiálů a pohybových aktivit)</b>            | <input type="checkbox"/> | <input type="checkbox"/> | <input type="checkbox"/> | <input type="checkbox"/> |
| <b>3.1.3. Představení tématu autentickým způsobem (např. vyprávění o různých jazycích a kulturách v historickém kontextu)</b> | <input type="checkbox"/> | <input type="checkbox"/> | <input type="checkbox"/> | <input type="checkbox"/> |

## 28. 3.2. Jazyk a symboly

*Atzīmējiet visus atbilstošos variantus.*

|                                                                                                                                                                             | Nikdy                    | Někdy                    | Často                    | Vždy                     |
|-----------------------------------------------------------------------------------------------------------------------------------------------------------------------------|--------------------------|--------------------------|--------------------------|--------------------------|
| <b>3.2.1. Podpora porozumění slovům, symbolům a číslům v různých formátech (např. vytváření grafů a tabulek)</b>                                                            | <input type="checkbox"/> | <input type="checkbox"/> | <input type="checkbox"/> | <input type="checkbox"/> |
| <b>3.2.2. Zlepšení porozumění symbolům a číslům prostřednictvím praktických činností</b>                                                                                    | <input type="checkbox"/> | <input type="checkbox"/> | <input type="checkbox"/> | <input type="checkbox"/> |
| <b>3.2.3. Reflexe pojmů prostřednictvím různých kultur, jazyků a dialektů (např. vysvětlování pojmů v různých jazycích a symbolech)</b>                                     | <input type="checkbox"/> | <input type="checkbox"/> | <input type="checkbox"/> | <input type="checkbox"/> |
| <b>3.2.4. Odstraňování stereotypů o různých jazycích a komunikačních prostředcích (např. učení se symbolům a výrazovým prostředkům, slovům a frázím v různých jazycích)</b> | <input type="checkbox"/> | <input type="checkbox"/> | <input type="checkbox"/> | <input type="checkbox"/> |
| <b>3.2.5. Představení tématu pomocí různých způsobů znázornění (např. pomocí videí, grafů a interaktivních aktivit)</b>                                                     | <input type="checkbox"/> | <input type="checkbox"/> | <input type="checkbox"/> | <input type="checkbox"/> |

## 29. 3.3. Budování znalostí

*Atzīmējiet visus atbilstošos variantus.*

|                                                                                                                                                             | Nikdy                    | Někdy                    | Často                    | Vždy                     |
|-------------------------------------------------------------------------------------------------------------------------------------------------------------|--------------------------|--------------------------|--------------------------|--------------------------|
| <b>3.3.1. Propojení stávajících a získaných znalostí (např. propojení stávajících znalostí o živých organismech s konkrétními ekosystémy)</b>               | <input type="checkbox"/> | <input type="checkbox"/> | <input type="checkbox"/> | <input type="checkbox"/> |
| <b>3.3.2. Porovnávání základních pojmů a vztahů (např. porovnávání charakteristických znaků zvířat)</b>                                                     | <input type="checkbox"/> | <input type="checkbox"/> | <input type="checkbox"/> | <input type="checkbox"/> |
| <b>3.3.3. Rozpoznávání různých zájmů a identit (např. kreslení různých vlajek nebo porovnávání různých barev očí a vlasů)</b>                               | <input type="checkbox"/> | <input type="checkbox"/> | <input type="checkbox"/> | <input type="checkbox"/> |
| <b>3.3.4. Propojování témat a zobecňování pojmů (např. poznávání dopravních značek během procházky nebo zkoumání různých plemen, barev a velikostí psů)</b> | <input type="checkbox"/> | <input type="checkbox"/> | <input type="checkbox"/> | <input type="checkbox"/> |

## 4. Používání více akčních a výrazových prostředků

Zhodnoťte, jak často by měly být v prostředí předškolního vzdělávání využívány následující akční a výrazové prostředky:

## 30. 4.1. Interakce

*Atzīmējiet visus atbilstošos variantus.*

|                                                                                                                                                                 | Nikdy                    | Někdy                    | Často                    | Vždy                     |
|-----------------------------------------------------------------------------------------------------------------------------------------------------------------|--------------------------|--------------------------|--------------------------|--------------------------|
| <b>4.1.1. Zajištění přístupu a předvídatelnosti v různých prostředích (např. pomocí hmatových, sluchových, symbolických a barevných signálů v okolí dítěte)</b> | <input type="checkbox"/> | <input type="checkbox"/> | <input type="checkbox"/> | <input type="checkbox"/> |
| <b>4.1.2. Zajištění přístupu k materiálům a nástrojům (např. sluchátka s potlačením hluku, zahradnické rukavice a alternativní komunikační nástroje)</b>        | <input type="checkbox"/> | <input type="checkbox"/> | <input type="checkbox"/> | <input type="checkbox"/> |

## 31. 4.2. Vyjadřování a komunikace

*Atzīmējiet visus atbilstošos variantus.*

|                                                                                                                                                | Nikdy                    | Někdy                    | Často                    | Vždy                     |
|------------------------------------------------------------------------------------------------------------------------------------------------|--------------------------|--------------------------|--------------------------|--------------------------|
| <b>4.2.1. Využívání různých komunikačních prostředků (např. umožnění dětem vyjádřit své myšlenky prostřednictvím umění, hudby nebo pohybu)</b> | <input type="checkbox"/> | <input type="checkbox"/> | <input type="checkbox"/> | <input type="checkbox"/> |
| <b>4.2.2. Poskytování různých materiálů (např. používání různých materiálů při plnění úkolů)</b>                                               | <input type="checkbox"/> | <input type="checkbox"/> | <input type="checkbox"/> | <input type="checkbox"/> |
| <b>4.2.3. Poskytování podpory a její postupné snižování (např. používání slovní a vizuální fyzické podpory, která se postupně snižuje)</b>     | <input type="checkbox"/> | <input type="checkbox"/> | <input type="checkbox"/> | <input type="checkbox"/> |
| <b>4.2.4. Používání různých řečových a vyjadřovacích prostředků (např. různých jazyků nebo alternativních komunikačních metod)</b>             | <input type="checkbox"/> | <input type="checkbox"/> | <input type="checkbox"/> | <input type="checkbox"/> |

## 32. 4.3. Vývoj strategie

*Atzīmējiet visus atbilstošos variantus.*

|                                                                                                                                                        | Nikdy                    | Někdy                    | Často                    | Vždy                     |
|--------------------------------------------------------------------------------------------------------------------------------------------------------|--------------------------|--------------------------|--------------------------|--------------------------|
| <b>4.3.1. Stanovení smysluplných cílů společně s dětmi (např. stanovení cíle naučit se během týdne tři nová slova prostřednictvím různých aktivit)</b> | <input type="checkbox"/> | <input type="checkbox"/> | <input type="checkbox"/> | <input type="checkbox"/> |
| <b>4.3.2. Předvídání problémů při činnostech (např. plánování návštěvy knihovny a předvídání možných potíží na cestě nebo v knihovně)</b>              | <input type="checkbox"/> | <input type="checkbox"/> | <input type="checkbox"/> | <input type="checkbox"/> |
| <b>4.3.3. Organizace zdrojů a informací (např. označování materiálů a nábytku)</b>                                                                     | <input type="checkbox"/> | <input type="checkbox"/> | <input type="checkbox"/> | <input type="checkbox"/> |
| <b>4.3.4. Sebehodnocení pokroku nebo sebereflexe získaných dovedností (např. používání grafů nebo tabulek pro naučené pojmy, písmena a myšlenky)</b>   | <input type="checkbox"/> | <input type="checkbox"/> | <input type="checkbox"/> | <input type="checkbox"/> |
| <b>4.3.5. Podpora inkluzivních postupů (např. zkoumání různých kulturních svátků nebo tradic)</b>                                                      | <input type="checkbox"/> | <input type="checkbox"/> | <input type="checkbox"/> | <input type="checkbox"/> |

## 5. Možnosti využití výukových metod a strategií zahrnutých v zásadách UDU

33. **5.1. Jaké problémy podle vás mohou nastat při snaze o začlenění různých strategií a metod zapojení, reprezentace nebo akce a vyjadřování do prostředí předškolního vzdělávání**

*Atzīmējiet tikai vienu variantu.*

- Nedostatek zdrojů
- Omezené znalosti nebo možnosti školení
- Časová omezení
- Odpor kolegů nebo vzdělávací instituce

34. **5.2. Jaké možnosti rozvoje profesních kompetencí nebo podpory by byly potřebné v souvislosti s osvojením metod a strategií uvedených v zásadách UDU pro podporu inkluzivních vzdělávacích postupů?**

*Atzīmējiet tikai vienu variantu.*

- Znalosti získané v rámci studijních programů
- Formální vzdělávání (kurzy, semináře) pro zvýšení odborné způsobilosti
- Samostatné učení prostřednictvím zdrojů, jako jsou knihy, online kurzy nebo výzkum
- Znalosti získané spoluprací s kolegy, podpůrným personálem nebo odborníky z jiných oborů
- Žádné relevantní znalosti

---

Uzņēmums Google nav šī satura autors un to neatbalsta.

Google Veidlapas
