# Supplementary material
Source: Research Square preprint supplement (doi:10.21203/rs.3.rs-9452587/v1)
Supplement: Supplementary file 3 [file 33a66d807b14f44b08bd5708.xlsx]

## Sheet: Sheet1
Laika zīmogs	1.1. País/ Land/ Země/ País	1.2. Género	1.3. Qual é o seu nível de formação académica mais elevado?	1.4. Experiência profissional (em anos):	1.5. Local de trabalho:	1.6. Como avalia a instituição de educação pré-escolar em que trabalha no que respeita à implementação de práticas de educação inclusiva?	1.7. Faixa etária das crianças com quem trabalha diariamente:	1.8. Quantas crianças estão atualmente inscritas no seu grupo de educação pré-escolar?	1.9. Quantos professores e auxiliares trabalham diariamente no seu grupo?	1.10. Quantas crianças do seu grupo beneficiam de medidas de apoio à aprendizagem e à inclusão?	1.11. Avalie a importância dos seguintes aspetos baseados nos princípios do Desenho Universal para a Aprendizagem na promoção de um ambiente de aprendizagem inclusivo: [Envolver as crianças em atividades através de diversos métodos]	1.11. Avalie a importância dos seguintes aspetos baseados nos princípios do Desenho Universal para a Aprendizagem na promoção de um ambiente de aprendizagem inclusivo: [Apresentar informações utilizando uma variedade de materiais]	1.11. Avalie a importância dos seguintes aspetos baseados nos princípios do Desenho Universal para a Aprendizagem na promoção de um ambiente de aprendizagem inclusivo: [Exprimir e avaliar os conhecimentos adquiridos através de vários meios]	1.12. Para responder às perguntas da secção seguinte e avaliar os métodos e estratégias de ensino abrangidos pelos princípios do DUA, indique as suas qualificações atuais:	2.1. Interesses e identidades do acolhimento: [2.1.1. Seleção de objetivos e tarefas de aprendizagem com base nos interesses específicos das crianças, no contexto cultural, no género, na faixa etária e nas capacidades (por exemplo, oferecendo opções para representar os resultados em formato de desenho, escultura, vídeo ou áudio)]	2.1. Interesses e identidades do acolhimento: [2.1.2. Atividades baseadas no jogo e em experiências práticas (por exemplo, jogos de papéis e visitas de estudo em vários ambientes - no interior e no exterior)]	2.1. Interesses e identidades do acolhimento: [2.1.3. Promoção do prazer nas atividades e tarefas realizadas (por exemplo, aproveitar as surpresas ou descobertas durante as atividades)]	2.1. Interesses e identidades do acolhimento: [2.1.4. Criação de um ambiente que reconheça as várias necessidades emocionais e sensoriais da criança (por exemplo, explorando diferentes ideias e questões e fornecendo auscultadores com cancelamento de ruído ou iluminação ajustada)]	2.2. Esforço sustentado e persistência [2.2.1. Explicar o objetivo das atividades (por exemplo, dizer às crianças por que razão estão a aprender sobre a partilha através de jogos de tabuleiro e de dramatização)]	2.2. Esforço sustentado e persistência [2.2.2. Proporcionar vários níveis de desafio (por exemplo, oferecer tarefas de dificuldade e complexidade diferentes para níveis de competências variáveis)]	2.2. Esforço sustentado e persistência [2.2.3. Promover o trabalho em equipa (por exemplo, incentivar as crianças a trabalharem em conjunto em projetos ou tarefas)]	2.2. Esforço sustentado e persistência [2.2.4. Fomentar um sentimento de pertença (por exemplo, partilhar experiências relacionadas com os conceitos que estão a ser aprendidos)]	2.2. Esforço sustentado e persistência [2.2.5. Dar feedback específico e prático (por exemplo, dizer a uma criança: "Gosto da forma como partilhaste os teus brinquedos com o teu amigo!")]	2.3. Capacidade emocional [2.3.1. Consciência das expetativas das crianças e promoção da motivação nas atividades (por exemplo, identificar o que poderão ler quando aprenderem a ler ou qual será a recompensa por completarem uma tarefa)]	2.3. Capacidade emocional [2.3.2. Desenvolver a capacidade de exprimir emoções e de se auto-regular (por exemplo, exprimir emoções utilizando emojis ou aprender respostas comportamentais através de jogos de papéis)]	2.3. Capacidade emocional [2.3.3. Avaliar o auto-desempenho e o progresso (por exemplo, criar gráficos para registar o número de letras aprendidas ou símbolos adquiridos durante um período específico)]	2.3. Capacidade emocional [2.3.4. Modelar a empatia através de debates e de jogos de papéis (por exemplo, utilizar debates ou jogos de papéis para promover a compreensão empática)]	3.1. Perceção [3.1.1. Adaptar a representação da informação (por exemplo, ferramentas digitais com ajustes de tamanho de letra e contraste de cor)]	3.1. Perceção [3.1.2. Fornecer informações utilizando vários formatos (por exemplo, utilizando vídeos, materiais áudio e atividades de movimento)]	3.1. Perceção [3.1.3. Representar o tema de uma forma autêntica (por exemplo, contar histórias sobre diferentes línguas e culturas num contexto histórico)]	3.2. Língua e símbolos [3.2.1. Promover a compreensão de palavras, símbolos e números em vários formatos (por exemplo, criar gráficos e tabelas)]	3.2. Língua e símbolos [3.2.2. Melhorar a compreensão dos símbolos e dos números através de atividades práticas]	3.2. Língua e símbolos [3.2.3. Refletir conceitos através de diferentes culturas, línguas e dialetos (por exemplo, explicar conceitos em várias línguas e símbolos)]	3.2. Língua e símbolos [3.2.4. Eliminar estereótipos sobre diferentes línguas e meios de comunicação (por exemplo, aprender símbolos e ferramentas expressivas, palavras e frases em várias línguas)]	3.2. Língua e símbolos [3.2.5. Representar o tema através de vários meios de representação (por exemplo, através de vídeos, gráficos e atividades interativas)]	3.3. Construir conhecimento [3.3.1. Ligar os conhecimentos existentes e adquiridos (por exemplo, ligar os conhecimentos existentes sobre organismos vivos a ecossistemas específicos)]	3.3. Construir conhecimento [3.3.2. Comparar conceitos e relações essenciais (por exemplo, comparar características de animais)]	3.3. Construir conhecimento [3.3.3. Reconhecer interesses e identidades diversas (por exemplo, desenhar bandeiras diferentes ou comparar várias cores de olhos/cabelos)]	3.3. Construir conhecimento [3.3.4. Relacionar tópicos e generalizar conceitos (por exemplo, aprender sobre sinais de trânsito durante um passeio ou explorar diferentes raças, cores e tamanhos de cães)]	4.1. Interação [4.1.1. Assegurar o acesso e a previsibilidade em vários ambientes (por exemplo, utilizando pistas tácteis, auditivas, simbólicas e coloridas no ambiente da criança)]	4.1. Interação [4.1.2. Proporcionar o acesso a materiais e ferramentas (por exemplo, utilizar auscultadores com cancelamento de ruído, luvas de jardinagem e ferramentas de comunicação alternativas)]	4.2. Expressão e comunicação [4.2.1. Utilização de vários meios de comunicação (por exemplo, permitir que as crianças expressem as suas ideias através da arte, da música ou do movimento)]	4.2. Expressão e comunicação [4.2.2. Fornecer vários materiais (por exemplo, utilizar diferentes materiais na realização de tarefas)]	4.2. Expressão e comunicação [4.2.3. Prestar apoio e reduzi-lo gradualmente (por exemplo, utilizando apoio físico verbal e visual que é gradualmente diminuído)]	4.2. Expressão e comunicação [4.2.4. Utilização de vários instrumentos de fala e de expressão (por exemplo, diferentes línguas ou métodos de comunicação alternativos)]	4.3. Desenvolvimento de estratégias [4.3.1. Estabelecer objetivos significativos em conjunto com as crianças (por exemplo, estabelecer objetivos para aprender três palavras novas numa semana através de várias atividades)]	4.3. Desenvolvimento de estratégias [4.3.2. Antecipar desafios em atividades (por exemplo, planear uma visita à biblioteca e antecipar potenciais dificuldades no caminho ou na biblioteca)]	4.3. Desenvolvimento de estratégias [4.3.3. Organizar recursos e informações (por exemplo, etiquetar materiais e mobiliário)]	4.3. Desenvolvimento de estratégias [4.3.4. Autoavaliação dos progressos ou autorreflexão sobre as competências adquiridas (por exemplo, utilização de gráficos ou tabelas para conceitos, letras e ideias aprendidos)]
2025.20.5 01:15:36	Portugal	Feminino	Mestrado	3 - 5 anos	Numa pequena cidade	Inclusiva (a instituição implementa medidas de suporte à aprendizagem e à inclusão)	3 - 5 anos	11 - 15 crianças	1 - 2	1 - 2 crianças	Bastante importante	Bastante importante	Bastante importante	Educador/Educadora de Infância	Frequentemente	Frequentemente	Frequentemente	Frequentemente	Frequentemente	Frequentemente	Frequentemente	Sempre	Frequentemente	Por vezes	Frequentemente	Frequentemente	Frequentemente	Por vezes	Frequentemente	Frequentemente	Frequentemente	Frequentemente	Sempre	Frequentemente	Sempre	Frequentemente	Frequentemente	Frequentemente	Frequentemente	Por vezes	Frequentemente	Frequentemente	Frequentemente	Frequentemente	Frequentemente	Frequentemente	Frequentemente	Por vezes	Frequentemente
2025.20.5 01:36:34	Portugal	Feminino	Ensino superior profissional (nível 2)	Mais de 10 anos	Numa pequena cidade	Inclusiva (a instituição implementa medidas de suporte à aprendizagem e à inclusão)	3 - 5 anos	16 - 20 crianças	1 - 2	1 - 2 crianças	Muito importante	Muito importante	Muito importante	Educador/Educadora de Infância	Sempre	Sempre	Sempre	Sempre	Sempre	Sempre	Sempre	Sempre	Sempre	Frequentemente	Frequentemente	Frequentemente	Sempre	Sempre	Sempre	Sempre	Sempre	Sempre	Sempre	Frequentemente, Sempre	Sempre	Frequentemente	Frequentemente	Sempre	Sempre	Sempre	Por vezes	Sempre	Frequentemente, Sempre	Sempre	Sempre	Frequentemente	Sempre	Sempre	Sempre
2025.20.5 08:16:59	Portugal	Feminino	Grau de doutoramento	Mais de 10 anos	Numa zona rural	Não aplicável	3 - 5 anos	11 - 15 crianças	1 - 2	Nenhum	Muito importante	Muito importante	Muito importante	Educador/Educadora de Infância	Frequentemente	Frequentemente	Frequentemente	Frequentemente	Frequentemente	Frequentemente	Frequentemente	Frequentemente	Frequentemente	Frequentemente	Frequentemente	Frequentemente	Frequentemente	Frequentemente	Frequentemente	Frequentemente	Frequentemente	Frequentemente	Frequentemente	Frequentemente	Frequentemente	Frequentemente	Frequentemente	Frequentemente	Frequentemente	Frequentemente	Frequentemente	Frequentemente	Frequentemente	Frequentemente	Frequentemente	Frequentemente	Frequentemente	Frequentemente	Frequentemente
2025.20.5 09:13:04	Portugal	Feminino	Mestrado	Mais de 10 anos	Numa zona rural	Inclusiva (a instituição implementa medidas de suporte à aprendizagem e à inclusão)	3 - 5 anos	16 - 20 crianças	1 - 2	1 - 2 crianças	Muito importante	Muito importante	Muito importante	Educador/Educadora de Infância	Frequentemente	Frequentemente	Frequentemente	Frequentemente	Frequentemente	Sempre	Frequentemente	Sempre	Sempre	Frequentemente	Frequentemente	Frequentemente	Frequentemente	Frequentemente	Frequentemente	Frequentemente	Frequentemente	Frequentemente	Frequentemente	Frequentemente	Frequentemente	Frequentemente	Frequentemente	Frequentemente	Frequentemente	Por vezes	Por vezes	Sempre	Sempre	Sempre	Sempre	Sempre	Sempre	Sempre	Sempre
2025.20.5 12:46:02	Portugal	Feminino	Mestrado	Mais de 10 anos	Numa pequena cidade	Inclusiva (a instituição implementa medidas de suporte à aprendizagem e à inclusão)	6 - 8 anos	1 - 5 crianças	1 - 2	3 - 5 crianças	Muito importante	Muito importante	Muito importante	Educador/Educadora de Infância em formação	Sempre	Sempre	Sempre	Sempre	Sempre	Frequentemente	Sempre	Sempre	Sempre	Sempre	Sempre	Sempre	Sempre	Frequentemente	Frequentemente	Frequentemente	Frequentemente	Frequentemente	Frequentemente	Frequentemente	Frequentemente	Frequentemente	Frequentemente	Frequentemente	Frequentemente	Sempre	Sempre	Sempre	Sempre	Sempre	Frequentemente	Sempre	Sempre	Sempre	Sempre
2025.20.5 23:13:19	Portugal	Feminino	Mestrado	Mais de 10 anos	Numa pequena cidade	Inclusiva (a instituição implementa medidas de suporte à aprendizagem e à inclusão)	3 - 5 anos	21 - 25 crianças	1 - 2	1 - 2 crianças	Bastante importante	Muito importante	Bastante importante	Educador/Educadora de Infância	Frequentemente	Frequentemente	Sempre	Sempre	Frequentemente	Frequentemente	Frequentemente	Frequentemente	Frequentemente	Frequentemente	Frequentemente	Por vezes	Frequentemente	Por vezes	Frequentemente	Por vezes	Frequentemente	Frequentemente	Frequentemente	Frequentemente	Frequentemente	Frequentemente	Frequentemente	Frequentemente	Sempre	Frequentemente	Frequentemente	Frequentemente	Sempre	Sempre	Frequentemente	Frequentemente	Frequentemente	Frequentemente	Frequentemente
2025.26.5 17:10:39	Portugal	Feminino	Bacharelato	Mais de 10 anos	Numa zona rural	Inclusiva (a instituição implementa medidas de suporte à aprendizagem e à inclusão)	3 - 5 anos	16 - 20 crianças	1 - 2	Mais de 5 crianças	Bastante importante	Bastante importante	Bastante importante	Educador/Educadora de Infância	Por vezes	Por vezes, Frequentemente	Frequentemente	Frequentemente	Frequentemente	Frequentemente	Frequentemente	Frequentemente	Frequentemente	Frequentemente	Frequentemente	Frequentemente	Frequentemente	Frequentemente	Frequentemente	Frequentemente	Sempre	Sempre	Sempre	Sempre	Frequentemente	Frequentemente	Frequentemente	Frequentemente	Por vezes	Frequentemente	Frequentemente	Frequentemente	Frequentemente	Frequentemente	Por vezes	Frequentemente	Frequentemente	Frequentemente	Frequentemente
2025.26.5 17:24:20	Portugal	Feminino	Ensino superior profissional (nível 1)	3 - 5 anos	Numa pequena cidade	Inclusiva (a instituição implementa medidas de suporte à aprendizagem e à inclusão)	3 - 5 anos	11 - 15 crianças	1 - 2	1 - 2 crianças	Sim não importa	Sim não importa	Não é importante	Educador/Educadora de Infância	Sempre	Frequentemente	Sempre	Sempre	Sempre	Sempre	Sempre	Sempre	Sempre	Frequentemente	Frequentemente	Sempre	Sempre	Frequentemente	Sempre	Frequentemente	Frequentemente	Sempre	Sempre	Frequentemente	Frequentemente	Sempre	Sempre	Sempre	Frequentemente	Frequentemente	Frequentemente	Frequentemente	Sempre	Frequentemente	Frequentemente	Frequentemente	Sempre		Sempre
2025.26.5 17:51:16	Portugal	Feminino	Ensino superior profissional (nível 2)	6 - 10 anos	Numa pequena cidade	Inclusiva (a instituição implementa medidas de suporte à aprendizagem e à inclusão)	1 - 3 anos	16 - 20 crianças	2 - 4	Nenhum	Muito importante	Muito importante	Muito importante	Educador/Educadora de Infância	Frequentemente	Sempre	Sempre	Frequentemente	Sempre	Sempre	Sempre	Sempre	Sempre	Sempre	Frequentemente	Por vezes	Frequentemente	Frequentemente	Frequentemente	Por vezes	Frequentemente	Sempre	Sempre	Por vezes	Frequentemente	Por vezes	Frequentemente	Por vezes	Frequentemente	Frequentemente	Frequentemente	Frequentemente	Frequentemente	Frequentemente	Por vezes	Sempre	Sempre	Sempre	Frequentemente
2025.26.5 18:00:06	Portugal	Feminino	Mestrado	Mais de 10 anos	Numa zona rural	Inclusiva (a instituição implementa medidas de suporte à aprendizagem e à inclusão)	3 - 5 anos	11 - 15 crianças	1 - 2	1 - 2 crianças	Bastante importante	Bastante importante	Bastante importante	Educador/Educadora de Infância	Frequentemente	Frequentemente	Frequentemente	Sempre	Frequentemente		Frequentemente	Frequentemente	Frequentemente	Frequentemente	Frequentemente	Frequentemente	Frequentemente	Frequentemente	Frequentemente	Frequentemente	Frequentemente	Frequentemente	Frequentemente	Frequentemente	Frequentemente	Sempre	Sempre	Frequentemente	Frequentemente	Frequentemente	Frequentemente	Sempre	Sempre	Frequentemente	Frequentemente	Sempre	Sempre	Sempre	Sempre
2025.26.5 19:35:47	Portugal	Feminino	Ensino superior profissional (nível 2)	Mais de 10 anos	Numa área metropolitana	Inclusiva (a instituição implementa medidas de suporte à aprendizagem e à inclusão)	3 - 5 anos	11 - 15 crianças	1 - 2	Nenhum	Muito importante	Muito importante	Muito importante	Educador/Educadora de Infância	Sempre	Sempre	Sempre	Sempre	Sempre	Sempre	Sempre	Sempre	Sempre	Sempre	Sempre	Sempre	Sempre	Sempre	Sempre	Sempre	Sempre	Sempre	Sempre	Sempre	Sempre	Frequentemente	Frequentemente	Frequentemente	Frequentemente	Sempre	Sempre	Sempre	Sempre	Sempre	Sempre	Sempre	Frequentemente	Sempre	Sempre
2025.26.5 19:36:16	Portugal	Feminino	Ensino superior profissional (nível 1)	Mais de 10 anos	Numa pequena cidade	Inclusiva (a instituição implementa medidas de suporte à aprendizagem e à inclusão)	3 - 5 anos	16 - 20 crianças	1 - 2	Nenhum, Não aplicável	Sim não importa	Sim não importa	Sim não importa	Educador/Educadora de Infância	Frequentemente	Frequentemente	Frequentemente	Frequentemente	Frequentemente	Frequentemente	Frequentemente	Frequentemente	Frequentemente	Frequentemente	Frequentemente	Frequentemente	Frequentemente	Frequentemente	Frequentemente	Frequentemente	Frequentemente	Frequentemente	Frequentemente	Frequentemente	Frequentemente	Frequentemente	Frequentemente	Frequentemente	Frequentemente	Frequentemente	Frequentemente	Frequentemente	Frequentemente	Frequentemente	Frequentemente	Frequentemente	Frequentemente	Frequentemente	Frequentemente
2025.26.5 19:48:17	Portugal	Feminino	Ensino superior profissional (nível 2)	Mais de 10 anos	Numa pequena cidade	Inclusiva (a instituição implementa medidas de suporte à aprendizagem e à inclusão)	3 - 5 anos	21 - 25 crianças	1 - 2	Nenhum	Bastante importante	Bastante importante	Bastante importante	Educador/Educadora de Infância	Sempre	Sempre	Sempre	Sempre	Frequentemente	Sempre	Sempre	Sempre	Sempre	Frequentemente	Sempre	Sempre	Sempre	Frequentemente	Sempre	Sempre	Frequentemente	Frequentemente	Sempre	Sempre	Frequentemente, Sempre	Sempre	Sempre	Sempre	Sempre	Sempre	Sempre	Frequentemente	Sempre	Sempre	Sempre	Frequentemente	Frequentemente	Por vezes	Sempre
2025.26.5 20:13:48	Portugal	Feminino	Ensino superior profissional (nível 2)	Mais de 10 anos	Numa pequena cidade	Inclusiva (a instituição implementa medidas de suporte à aprendizagem e à inclusão)	3 - 5 anos	16 - 20 crianças	1 - 2	1 - 2 crianças	Muito importante	Muito importante	Muito importante	Educador/Educadora de Infância	Frequentemente	Frequentemente	Frequentemente	Frequentemente	Frequentemente	Frequentemente	Sempre	Sempre	Sempre	Frequentemente	Frequentemente	Por vezes	Frequentemente	Sempre	Sempre	Frequentemente	Frequentemente	Frequentemente	Por vezes	Por vezes	Frequentemente	Por vezes	Frequentemente	Por vezes	Por vezes	Por vezes	Por vezes	Frequentemente	Frequentemente	Frequentemente	Frequentemente	Frequentemente	Por vezes	Por vezes	Frequentemente
2025.26.5 20:19:07	Portugal	Feminino	Bacharelato	Mais de 10 anos	Numa pequena cidade	Inclusiva (a instituição implementa medidas de suporte à aprendizagem e à inclusão)	3 - 5 anos	21 - 25 crianças	1 - 2	Não aplicável	Não é importante	Não é importante	Não é importante	Educador/Educadora de Infância	Frequentemente	Frequentemente	Frequentemente	Frequentemente	Frequentemente	Frequentemente	Frequentemente	Frequentemente	Frequentemente	Por vezes	Frequentemente	Frequentemente	Frequentemente	Frequentemente	Frequentemente	Frequentemente	Frequentemente	Frequentemente	Frequentemente	Frequentemente	Frequentemente	Frequentemente	Frequentemente	Frequentemente	Frequentemente	Frequentemente	Frequentemente	Frequentemente	Frequentemente	Frequentemente	Frequentemente	Frequentemente	Frequentemente	Frequentemente	Frequentemente
2025.26.5 20:49:27	Portugal	Feminino	Ensino superior profissional (nível 1)	Mais de 10 anos	Numa área metropolitana	Inclusiva (a instituição implementa medidas de suporte à aprendizagem e à inclusão)	3 - 5 anos	16 - 20 crianças	2 - 4	1 - 2 crianças	Muito importante	Muito importante	Muito importante	Educador/Educadora de Infância	Frequentemente	Sempre	Sempre	Frequentemente	Frequentemente	Sempre	Sempre	Sempre	Sempre	Frequentemente	Sempre	Frequentemente	Sempre	Frequentemente	Sempre	Frequentemente	Sempre	Sempre	Frequentemente	Frequentemente	Sempre	Sempre	Sempre	Sempre	Sempre	Frequentemente	Sempre	Frequentemente	Sempre	Sempre	Frequentemente	Frequentemente	Frequentemente	Sempre	Frequentemente
2025.26.5 20:58:38	Portugal	Feminino	Mestrado	3 - 5 anos	Numa zona rural	Não aplicável	Grupos etários mistos	Não aplicável	Não aplicável	Não aplicável	Muito importante	Muito importante	Bastante importante	Educador/Educadora de Infância	Frequentemente	Sempre	Frequentemente	Sempre	Por vezes	Frequentemente	Sempre	Frequentemente	Frequentemente	Por vezes	Frequentemente	Nunca	Por vezes	Frequentemente	Frequentemente	Por vezes	Por vezes	Frequentemente	Por vezes	Frequentemente	Por vezes	Por vezes	Frequentemente	Frequentemente	Frequentemente	Frequentemente	Por vezes	Frequentemente	Frequentemente	Nunca	Por vezes	Por vezes	Por vezes	Frequentemente	Nunca
2025.26.5 21:02:01	Portugal	Feminino	Ensino superior profissional (nível 2)	Mais de 10 anos	Numa pequena cidade	Inclusiva (a instituição implementa medidas de suporte à aprendizagem e à inclusão)	3 - 5 anos, Grupos etários mistos	16 - 20 crianças	2 - 4	3 - 5 crianças	Muito importante	Muito importante	Muito importante	Educador/Educadora de Infância	Sempre	Sempre	Sempre	Sempre	Sempre	Sempre	Sempre	Sempre	Sempre	Sempre	Sempre	Por vezes	Frequentemente	Por vezes	Frequentemente	Sempre	Frequentemente	Sempre	Por vezes	Por vezes	Frequentemente	Por vezes	Por vezes	Frequentemente	Sempre	Frequentemente	Frequentemente	Sempre	Sempre	Frequentemente	Por vezes	Por vezes	Sempre	Nunca	Por vezes
2025.26.5 21:37:05	Portugal	Feminino	Ensino superior profissional (nível 1)	Mais de 10 anos	Numa zona rural	Inclusiva (a instituição implementa medidas de suporte à aprendizagem e à inclusão)	3 - 5 anos	11 - 15 crianças	1 - 2	1 - 2 crianças	Bastante importante	Bastante importante	Bastante importante	Educador/Educadora de Infância	Por vezes	Frequentemente	Frequentemente	Frequentemente	Frequentemente	Frequentemente	Frequentemente	Frequentemente	Frequentemente	Frequentemente	Frequentemente	Por vezes	Frequentemente	Frequentemente	Sempre	Sempre	Sempre	Sempre	Frequentemente	Frequentemente	Frequentemente	Sempre	Sempre	Sempre	Frequentemente	Por vezes	Por vezes	Sempre	Frequentemente	Frequentemente	Frequentemente	Por vezes	Sempre	Frequentemente	Frequentemente
2025.26.5 21:51:55	Portugal	Feminino	Ensino superior profissional (nível 2)	Mais de 10 anos	Numa área metropolitana	Inclusiva (a instituição implementa medidas de suporte à aprendizagem e à inclusão)	6 - 8 anos	21 - 25 crianças	1 - 2	3 - 5 crianças	Sim não importa	Sim não importa	Sim não importa	Educador/Educadora de Infância	Por vezes	Frequentemente	Frequentemente	Por vezes	Frequentemente	Frequentemente	Frequentemente	Frequentemente	Frequentemente	Frequentemente	Frequentemente	Por vezes	Frequentemente, Sempre	Frequentemente	Por vezes	Frequentemente	Frequentemente	Por vezes	Por vezes	Por vezes	Por vezes	Frequentemente	Frequentemente	Frequentemente	Frequentemente	Frequentemente	Frequentemente	Por vezes	Por vezes	Frequentemente	Por vezes	Frequentemente	Frequentemente	Frequentemente	Por vezes
2025.26.5 22:41:14	Portugal	Feminino	Ensino superior profissional (nível 1)	Mais de 10 anos	Numa pequena cidade	Não-inclusiva (a instituição não implementa medidas de suporte à aprendizagem e à inclusão)	3 - 5 anos	16 - 20 crianças	1 - 2	Mais de 5 crianças	Sim não importa, Muito importante	Muito importante	Muito importante	Educador/Educadora de Infância	Frequentemente	Frequentemente	Por vezes	Por vezes	Sempre	Sempre	Sempre	Sempre	Sempre	Frequentemente	Sempre	Sempre	Frequentemente	Por vezes	Por vezes	Por vezes	Sempre	Sempre	Frequentemente	Frequentemente	Sempre	Frequentemente	Sempre	Frequentemente	Sempre	Frequentemente	Frequentemente	Frequentemente	Sempre	Sempre	Frequentemente	Sempre	Frequentemente	Frequentemente	Frequentemente
2025.26.5 22:56:16	Portugal	Feminino	Mestrado	Mais de 10 anos	Numa pequena cidade	Inclusiva (a instituição implementa medidas de suporte à aprendizagem e à inclusão)	3 - 5 anos	21 - 25 crianças	1 - 2	3 - 5 crianças	Não é importante, Muito importante	Muito importante	Muito importante	Educador/Educadora de Infância	Frequentemente	Sempre		Sempre	Frequentemente	Sempre	Frequentemente	Frequentemente	Frequentemente	Frequentemente	Frequentemente	Frequentemente	Por vezes	Frequentemente	Frequentemente	Frequentemente	Frequentemente	Frequentemente	Frequentemente	Frequentemente	Frequentemente	Frequentemente	Frequentemente	Frequentemente	Frequentemente	Por vezes	Por vezes	Frequentemente	Frequentemente	Frequentemente	Frequentemente	Sempre	Sempre	Frequentemente, Sempre	Frequentemente
2025.26.5 23:23:10	Portugal	Feminino	Bacharelato	Mais de 10 anos	Numa pequena cidade	Não-inclusiva (a instituição não implementa medidas de suporte à aprendizagem e à inclusão)	3 - 5 anos	21 - 25 crianças	2 - 4	Nenhum	Sim não importa	Sim não importa	Sim não importa	Educador/Educadora de Infância	Frequentemente	Frequentemente	Frequentemente	Nunca	Frequentemente	Frequentemente	Por vezes	Frequentemente	Frequentemente	Por vezes	Por vezes	Por vezes	Por vezes	Por vezes	Frequentemente	Por vezes	Por vezes	Frequentemente	Por vezes	Por vezes	Por vezes	Frequentemente	Frequentemente	Frequentemente	Frequentemente	Frequentemente	Nunca	Frequentemente	Frequentemente	Frequentemente	Por vezes	Frequentemente	Frequentemente	Por vezes	Por vezes
2025.26.5 23:36:18	Portugal	Feminino	Bacharelato	Mais de 10 anos	Numa zona rural	Inclusiva (a instituição implementa medidas de suporte à aprendizagem e à inclusão)	3 - 5 anos	11 - 15 crianças	1 - 2	3 - 5 crianças	Muito importante	Muito importante	Muito importante	Educador/Educadora de Infância	Sempre	Sempre	Sempre	Sempre	Frequentemente	Frequentemente	Sempre	Sempre	Sempre	Sempre	Frequentemente	Frequentemente	Sempre	Por vezes	Sempre	Nunca	Por vezes	Sempre	Sempre	Sempre	Sempre	Sempre	Frequentemente	Frequentemente	Sempre	Frequentemente	Frequentemente	Por vezes	Sempre	Frequentemente	Frequentemente	Frequentemente	Frequentemente	Frequentemente	Sempre
2025.27.5 00:38:18	Portugal	Feminino	Bacharelato	Mais de 10 anos	Numa pequena cidade	Inclusiva (a instituição implementa medidas de suporte à aprendizagem e à inclusão)	3 - 5 anos	21 - 25 crianças	5 ou mais	1 - 2 crianças	Bastante importante	Bastante importante	Bastante importante	Educador/Educadora de Infância	Sempre	Sempre	Sempre	Sempre	Sempre	Sempre	Sempre	Sempre	Sempre	Sempre	Sempre	Sempre	Sempre	Frequentemente	Frequentemente	Frequentemente	Frequentemente	Frequentemente	Frequentemente	Frequentemente	Frequentemente	Frequentemente	Frequentemente	Frequentemente	Frequentemente	Sempre	Frequentemente	Frequentemente	Frequentemente	Frequentemente	Frequentemente	Sempre	Frequentemente	Sempre	Sempre
2025.27.5 00:46:45	Portugal	Feminino	Bacharelato	Mais de 10 anos	Numa pequena cidade	Inclusiva (a instituição implementa medidas de suporte à aprendizagem e à inclusão)	3 - 5 anos	16 - 20 crianças	1 - 2	3 - 5 crianças	Bastante importante	Bastante importante	Bastante importante	Educador/Educadora de Infância	Frequentemente	Sempre	Frequentemente	Frequentemente	Frequentemente	Frequentemente	Frequentemente	Frequentemente	Frequentemente	Por vezes	Frequentemente	Por vezes	Frequentemente	Por vezes	Nunca	Nunca	Por vezes	Frequentemente	Por vezes	Por vezes	Por vezes	Por vezes	Frequentemente	Frequentemente	Sempre	Por vezes	Por vezes	Frequentemente	Frequentemente	Frequentemente	Por vezes	Por vezes	Por vezes	Frequentemente	Por vezes
2025.27.5 00:55:40	Portugal	Feminino	Ensino superior profissional (nível 2)	Mais de 10 anos	Numa área metropolitana	Inclusiva (a instituição implementa medidas de suporte à aprendizagem e à inclusão)	3 - 5 anos, Grupos etários mistos	21 - 25 crianças	1 - 2	1 - 2 crianças	Não é importante			Educador/Educadora de Infância	Nunca			Nunca	Nunca		Nunca	Nunca	Nunca		Nunca		Nunca	Nunca	Nunca	Nunca	Nunca	Nunca		Nunca				Nunca	Nunca	Nunca	Nunca	Nunca	Nunca	Nunca	Nunca	Nunca	Nunca	Nunca	Nunca
2025.27.5 01:23:27	Portugal	Feminino	Atualmente a frequentar um curso de qualificação	Menos de um ano	Numa área metropolitana	Inclusiva (a instituição implementa medidas de suporte à aprendizagem e à inclusão)	3 - 5 anos	16 - 20 crianças	2 - 4	3 - 5 crianças	Bastante importante	Muito importante	Bastante importante	Educador/Educadora de Infância em formação	Por vezes	Por vezes	Frequentemente	Frequentemente	Sempre	Frequentemente	Frequentemente	Sempre	Sempre	Frequentemente	Sempre	Frequentemente	Sempre	Frequentemente	Frequentemente	Frequentemente	Frequentemente	Sempre	Sempre	Frequentemente	Frequentemente	Sempre	Frequentemente	Sempre	Sempre	Sempre	Frequentemente	Frequentemente	Frequentemente	Frequentemente	Frequentemente	Frequentemente	Frequentemente	Sempre	Sempre
2025.27.5 09:38:09	Portugal	Feminino	Mestrado	Mais de 10 anos	Numa zona rural	Inclusiva (a instituição implementa medidas de suporte à aprendizagem e à inclusão)	0 - 12 meses, 1 - 3 anos, 3 - 5 anos	16 - 20 crianças	1 - 2	3 - 5 crianças	Muito importante	Muito importante	Muito importante	Educador/Educadora de Infância	Sempre	Sempre	Frequentemente	Sempre	Sempre	Sempre	Frequentemente	Sempre	Sempre	Sempre	Frequentemente	Frequentemente	Frequentemente	Por vezes	Por vezes	Por vezes	Por vezes	Por vezes	Por vezes	Por vezes	Por vezes	Por vezes	Por vezes	Por vezes	Por vezes	Por vezes	Por vezes	Frequentemente	Frequentemente	Frequentemente	Frequentemente	Frequentemente	Frequentemente	Frequentemente	Frequentemente
2025.27.5 12:56:50	Portugal	Feminino	Ensino superior profissional (nível 2)	Mais de 10 anos	Numa pequena cidade	Inclusiva (a instituição implementa medidas de suporte à aprendizagem e à inclusão)	3 - 5 anos	21 - 25 crianças	1 - 2	1 - 2 crianças	Muito importante	Muito importante	Muito importante	Educador/Educadora de Infância	Frequentemente	Frequentemente	Sempre	Sempre	Sempre	Sempre	Sempre	Sempre	Sempre	Frequentemente	Sempre	Frequentemente	Sempre	Por vezes	Frequentemente	Sempre	Por vezes	Frequentemente	Frequentemente	Frequentemente	Frequentemente	Sempre	Sempre	Sempre	Sempre	Frequentemente	Frequentemente	Sempre	Sempre	Sempre	Sempre	Frequentemente	Sempre	Sempre	Sempre
2025.27.5 13:14:45	Portugal	Feminino	Ensino superior profissional (nível 2)	Mais de 10 anos	Numa pequena cidade	Inclusiva (a instituição implementa medidas de suporte à aprendizagem e à inclusão)	Grupos etários mistos	Não aplicável	Não aplicável	Não aplicável	Bastante importante	Bastante importante	Bastante importante	Educador/Educadora de Infância	Frequentemente	Frequentemente	Frequentemente	Frequentemente	Frequentemente	Frequentemente	Frequentemente	Frequentemente	Frequentemente	Frequentemente	Frequentemente	Frequentemente	Frequentemente	Frequentemente	Frequentemente	Frequentemente	Frequentemente	Frequentemente	Frequentemente	Frequentemente	Frequentemente	Frequentemente	Frequentemente	Frequentemente	Frequentemente	Frequentemente	Frequentemente	Frequentemente	Frequentemente	Frequentemente	Frequentemente	Frequentemente	Frequentemente	Frequentemente
2025.27.5 14:13:51	Portugal	Feminino	Ensino superior profissional (nível 1)	Menos de um ano	Não aplicável						Muito importante	Muito importante	Muito importante	Estudante
2025.27.5 14:46:59	Portugal	Feminino	Mestrado	Mais de 10 anos	Numa zona rural	Inclusiva (a instituição implementa medidas de suporte à aprendizagem e à inclusão)	3 - 5 anos	11 - 15 crianças	1 - 2	1 - 2 crianças	Muito importante	Muito importante	Muito importante	Educador/Educadora de Infância	Sempre	Frequentemente	Frequentemente	Frequentemente	Sempre	Sempre	Frequentemente	Sempre	Sempre	Frequentemente	Frequentemente	Por vezes	Frequentemente	Frequentemente	Frequentemente	Frequentemente	Frequentemente	Frequentemente	Por vezes	Por vezes	Frequentemente	Frequentemente	Frequentemente	Frequentemente	Frequentemente	Frequentemente	Por vezes	Frequentemente	Frequentemente	Frequentemente	Por vezes	Frequentemente	Frequentemente	Frequentemente	Frequentemente
2025.27.5 18:53:19	Portugal	Feminino	Ensino superior profissional (nível 2)	Mais de 10 anos	Numa área metropolitana	Inclusiva (a instituição implementa medidas de suporte à aprendizagem e à inclusão)	3 - 5 anos	16 - 20 crianças	1 - 2	3 - 5 crianças	Muito importante	Bastante importante	Bastante importante	Educador/Educadora de Infância	Por vezes	Frequentemente	Sempre	Frequentemente	Sempre	Sempre	Sempre	Frequentemente	Frequentemente	Sempre	Sempre	Frequentemente	Sempre	Por vezes	Frequentemente	Por vezes	Frequentemente	Sempre	Frequentemente	Frequentemente	Frequentemente	Sempre	Sempre	Sempre	Frequentemente	Frequentemente	Frequentemente	Sempre	Sempre	Sempre	Por vezes	Por vezes	Sempre	Frequentemente	Frequentemente
2025.27.5 20:10:28	Portugal	Feminino	Ensino superior profissional (nível 2)	Mais de 10 anos	Numa área metropolitana	Inclusiva (a instituição implementa medidas de suporte à aprendizagem e à inclusão)	3 - 5 anos	16 - 20 crianças	1 - 2	1 - 2 crianças	Muito importante	Muito importante	Muito importante	Educador/Educadora de Infância	Frequentemente	Frequentemente	Sempre	Por vezes	Sempre	Frequentemente	Sempre	Frequentemente	Sempre	Sempre	Sempre	Frequentemente	Sempre	Nunca	Por vezes	Por vezes	Sempre	Sempre	Por vezes	Nunca	Frequentemente	Sempre	Sempre	Sempre	Por vezes	Sempre	Nunca	Sempre	Sempre	Sempre	Nunca	Frequentemente	Frequentemente	Sempre	Frequentemente
2025.28.5 00:24:01	Portugal	Feminino	Ensino superior profissional (nível 2)	Mais de 10 anos	Numa zona rural	Inclusiva (a instituição implementa medidas de suporte à aprendizagem e à inclusão)	3 - 5 anos	16 - 20 crianças	1 - 2	1 - 2 crianças	Muito importante	Muito importante	Muito importante	Educador/Educadora de Infância	Frequentemente	Frequentemente	Frequentemente	Frequentemente	Frequentemente	Frequentemente	Frequentemente	Frequentemente	Frequentemente	Frequentemente	Por vezes	Por vezes	Frequentemente	Frequentemente	Frequentemente	Frequentemente	Por vezes	Frequentemente	Frequentemente	Por vezes	Frequentemente	Frequentemente	Frequentemente	Frequentemente	Frequentemente	Frequentemente	Frequentemente	Frequentemente	Frequentemente	Frequentemente	Frequentemente	Frequentemente	Frequentemente	Frequentemente	Por vezes
2025.28.5 01:24:52	Portugal	Feminino	Mestrado	Mais de 10 anos	Numa pequena cidade	Inclusiva (a instituição implementa medidas de suporte à aprendizagem e à inclusão)	0 - 12 meses, 1 - 3 anos, Grupos etários mistos	16 - 20 crianças	2 - 4	1 - 2 crianças	Muito importante	Bastante importante	Muito importante	Educador/Educadora de Infância	Frequentemente	Frequentemente	Frequentemente	Frequentemente	Frequentemente	Sempre	Sempre	Sempre	Frequentemente	Frequentemente	Frequentemente	Sempre	Por vezes	Frequentemente	Frequentemente	Por vezes, Frequentemente	Frequentemente	Frequentemente	Por vezes	Por vezes	Por vezes	Frequentemente	Frequentemente	Por vezes	Por vezes	Frequentemente	Frequentemente	Frequentemente	Frequentemente	Frequentemente	Por vezes	Frequentemente	Por vezes	Frequentemente	Frequentemente
2025.28.5 02:11:17	Portugal	Feminino	Mestrado	Mais de 10 anos	Numa zona rural	Inclusiva (a instituição implementa medidas de suporte à aprendizagem e à inclusão)	3 - 5 anos	6 - 10 crianças	1 - 2	Nenhum	Muito importante	Muito importante	Muito importante	Educador/Educadora de Infância	Sempre	Frequentemente	Sempre	Frequentemente	Sempre	Sempre	Sempre	Sempre	Sempre	Frequentemente	Frequentemente	Frequentemente	Frequentemente	Frequentemente	Frequentemente	Frequentemente	Frequentemente	Frequentemente	Frequentemente	Frequentemente	Frequentemente	Frequentemente	Frequentemente	Frequentemente	Frequentemente	Frequentemente	Frequentemente	Frequentemente	Frequentemente	Sempre	Frequentemente	Frequentemente	Sempre	Frequentemente	Frequentemente
2025.28.5 08:35:16	Portugal	Feminino	Mestrado	3 - 5 anos	Numa pequena cidade	Inclusiva (a instituição implementa medidas de suporte à aprendizagem e à inclusão)	Grupos etários mistos	26 ou mais crianças	1 - 2	Mais de 5 crianças	Sim não importa	Sim não importa	Sim não importa	Educador/Educadora de Infância	Frequentemente	Frequentemente	Por vezes	Frequentemente	Frequentemente	Frequentemente	Frequentemente	Frequentemente	Frequentemente	Frequentemente	Frequentemente	Frequentemente	Frequentemente	Frequentemente	Frequentemente	Frequentemente	Frequentemente	Frequentemente	Frequentemente	Por vezes	Frequentemente	Por vezes, Frequentemente	Por vezes	Frequentemente	Frequentemente	Por vezes	Por vezes	Frequentemente	Frequentemente	Frequentemente	Frequentemente	Por vezes	Por vezes	Frequentemente	Frequentemente
2025.28.5 09:08:44	Portugal	Feminino	Bacharelato	Mais de 10 anos	Numa área metropolitana	Inclusiva (a instituição implementa medidas de suporte à aprendizagem e à inclusão)	3 - 5 anos	16 - 20 crianças	1 - 2	3 - 5 crianças	Muito importante	Muito importante	Muito importante	Educador/Educadora de Infância	Sempre	Sempre	Sempre	Por vezes	Frequentemente	Sempre	Sempre	Sempre	Sempre	Frequentemente	Sempre	Por vezes	Sempre	Nunca	Sempre	Nunca	Por vezes	Sempre	Por vezes	Por vezes	Por vezes	Frequentemente	Frequentemente	Frequentemente	Frequentemente	Por vezes	Por vezes	Frequentemente	Frequentemente	Frequentemente	Por vezes	Frequentemente	Por vezes	Frequentemente	Por vezes
2025.28.5 12:58:37	Portugal	Feminino	Ensino superior profissional (nível 2)	3 - 5 anos	Numa zona rural	Inclusiva (a instituição implementa medidas de suporte à aprendizagem e à inclusão)	Grupos etários mistos	21 - 25 crianças	2 - 4	Não aplicável	Sim não importa	Sim não importa	Sim não importa	Educador/Educadora de Infância	Frequentemente	Frequentemente	Frequentemente	Por vezes	Frequentemente	Frequentemente	Por vezes	Frequentemente	Frequentemente	Por vezes	Por vezes	Por vezes	Por vezes	Por vezes	Por vezes	Por vezes	Por vezes	Por vezes	Por vezes	Por vezes	Por vezes	Por vezes	Por vezes	Por vezes	Por vezes	Por vezes	Por vezes	Por vezes	Por vezes	Por vezes	Por vezes	Por vezes	Por vezes	Por vezes	Por vezes
2025.28.5 14:05:34	Portugal	Feminino	Ensino superior profissional (nível 2)	Mais de 10 anos	Numa área metropolitana	Inclusiva (a instituição implementa medidas de suporte à aprendizagem e à inclusão)	3 - 5 anos	21 - 25 crianças	2 - 4	3 - 5 crianças	Bastante importante	Muito importante	Bastante importante	Educador/Educadora de Infância	Sempre	Sempre	Sempre	Por vezes	Sempre	Frequentemente	Por vezes	Frequentemente	Frequentemente	Frequentemente	Por vezes	Frequentemente	Frequentemente	Por vezes	Por vezes	Frequentemente	Por vezes	Por vezes	Por vezes	Por vezes	Por vezes	Frequentemente	Frequentemente	Por vezes	Por vezes	Por vezes	Por vezes	Frequentemente	Frequentemente	Frequentemente	Por vezes	Por vezes	Frequentemente	Frequentemente	Por vezes
2025.28.5 14:48:40	Portugal	Feminino	Atualmente a frequentar um curso de qualificação	Menos de um ano	Numa pequena cidade	Inclusiva (a instituição implementa medidas de suporte à aprendizagem e à inclusão)	3 - 5 anos, Grupos etários mistos	21 - 25 crianças	1 - 2	1 - 2 crianças	Muito importante	Bastante importante	Bastante importante	Estudante
2025.28.5 15:34:27	Portugal	Feminino	Ensino superior profissional (nível 2)	6 - 10 anos	Numa pequena cidade	Inclusiva (a instituição implementa medidas de suporte à aprendizagem e à inclusão)	3 - 5 anos	21 - 25 crianças	1 - 2	Nenhum	Muito importante	Muito importante	Muito importante	Educador/Educadora de Infância	Frequentemente	Frequentemente	Frequentemente	Frequentemente	Frequentemente	Frequentemente	Frequentemente	Frequentemente	Frequentemente	Por vezes	Por vezes	Frequentemente	Frequentemente	Frequentemente	Frequentemente	Frequentemente	Por vezes	Frequentemente	Frequentemente	Por vezes	Frequentemente	Frequentemente	Frequentemente	Frequentemente	Frequentemente	Frequentemente	Nunca	Frequentemente	Frequentemente	Frequentemente	Frequentemente	Frequentemente	Frequentemente	Frequentemente	Por vezes
2025.28.5 15:45:21	Portugal	Feminino	Mestrado	Mais de 10 anos	Numa pequena cidade	Inclusiva (a instituição implementa medidas de suporte à aprendizagem e à inclusão)	6 - 8 anos	21 - 25 crianças	1 - 2	1 - 2 crianças	Muito importante	Muito importante	Muito importante	Educador/Educadora de Infância	Sempre	Sempre	Sempre	Sempre	Sempre	Sempre	Sempre	Sempre	Sempre	Sempre	Sempre	Sempre	Sempre	Frequentemente	Frequentemente	Frequentemente	Frequentemente	Frequentemente	Sempre	Sempre	Sempre	Sempre	Sempre	Sempre	Sempre	Sempre	Sempre	Sempre	Sempre	Sempre	Sempre	Frequentemente	Frequentemente	Frequentemente	Sempre
2025.28.5 15:50:01	Portugal	Feminino	Bacharelato	Mais de 10 anos	Numa área metropolitana	Inclusiva (a instituição implementa medidas de suporte à aprendizagem e à inclusão)	3 - 5 anos, Grupos etários mistos	21 - 25 crianças	1 - 2	1 - 2 crianças	Bastante importante	Bastante importante	Bastante importante	Educador/Educadora de Infância	Sempre	Frequentemente	Sempre	Sempre	Sempre	Sempre	Sempre	Frequentemente	Frequentemente	Frequentemente	Sempre	Frequentemente	Frequentemente	Por vezes	Frequentemente	Por vezes	Frequentemente	Frequentemente	Nunca	Nunca	Frequentemente	Frequentemente	Sempre	Sempre	Frequentemente	Frequentemente	Por vezes	Frequentemente	Frequentemente	Frequentemente	Por vezes	Por vezes	Por vezes	Frequentemente	Frequentemente
2025.28.5 15:53:19	Portugal	Feminino	Bacharelato	Mais de 10 anos	Numa área metropolitana	Inclusiva (a instituição implementa medidas de suporte à aprendizagem e à inclusão)	3 - 5 anos	21 - 25 crianças	1 - 2	1 - 2 crianças	Bastante importante	Bastante importante	Bastante importante	Educador/Educadora de Infância	Frequentemente	Frequentemente	Frequentemente	Frequentemente	Frequentemente	Sempre	Sempre	Frequentemente	Sempre	Por vezes	Por vezes	Por vezes	Frequentemente	Por vezes	Por vezes	Por vezes	Nunca	Por vezes	Nunca	Nunca	Por vezes	Por vezes	Frequentemente	Por vezes	Frequentemente	Por vezes	Por vezes	Frequentemente	Frequentemente	Sempre	Frequentemente	Frequentemente	Frequentemente	Frequentemente	Frequentemente
2025.28.5 15:53:39	Portugal	Feminino	Mestrado	Mais de 10 anos	Numa pequena cidade	Inclusiva (a instituição implementa medidas de suporte à aprendizagem e à inclusão)	3 - 5 anos	21 - 25 crianças	1 - 2	Nenhum	Muito importante	Muito importante	Muito importante	Educador/Educadora de Infância	Sempre	Sempre	Sempre	Sempre	Sempre	Sempre	Sempre	Sempre	Sempre	Sempre	Sempre	Sempre	Sempre	Frequentemente	Frequentemente	Frequentemente	Frequentemente	Frequentemente	Por vezes	Frequentemente	Frequentemente	Frequentemente	Frequentemente	Sempre	Sempre	Sempre	Sempre	Sempre	Sempre	Sempre	Sempre	Sempre	Sempre	Sempre	Sempre
2025.28.5 15:56:34	Portugal	Feminino	Mestrado	Mais de 10 anos	Numa pequena cidade	Inclusiva (a instituição implementa medidas de suporte à aprendizagem e à inclusão)	3 - 5 anos	21 - 25 crianças	1 - 2	Nenhum	Muito importante	Muito importante	Muito importante	Educador/Educadora de Infância	Frequentemente	Frequentemente	Frequentemente	Frequentemente	Sempre	Sempre	Sempre	Sempre	Sempre	Sempre	Sempre	Sempre	Sempre	Sempre	Sempre	Sempre	Frequentemente	Frequentemente	Frequentemente	Frequentemente	Sempre	Sempre	Sempre	Frequentemente	Sempre	Sempre	Sempre	Sempre	Sempre	Sempre	Sempre	Sempre	Sempre	Sempre	Sempre
2025.28.5 16:04:03	Portugal	Feminino	Mestrado	Mais de 10 anos	Numa área metropolitana	Inclusiva (a instituição implementa medidas de suporte à aprendizagem e à inclusão)	3 - 5 anos	26 ou mais crianças	5 ou mais	Mais de 5 crianças	Bastante importante	Bastante importante	Bastante importante	Educador/Educadora de Infância	Frequentemente	Frequentemente	Frequentemente	Por vezes	Sempre	Frequentemente	Frequentemente	Por vezes	Frequentemente	Por vezes	Sempre	Frequentemente	Frequentemente	Por vezes	Frequentemente	Frequentemente	Frequentemente	Sempre	Frequentemente	Sempre	Sempre	Frequentemente	Frequentemente	Frequentemente	Por vezes	Frequentemente	Por vezes	Sempre	Sempre	Sempre	Sempre	Sempre	Sempre	Frequentemente	Frequentemente
2025.28.5 18:50:30	Portugal	Feminino	Atualmente a frequentar um curso de qualificação	Sem experiência	Não aplicável	Não aplicável	Não aplicável	Não aplicável	Não aplicável	Não aplicável	Não é importante, Sim não importa, Muito importante	Muito importante	Muito importante	Estudante
2025.28.5 19:23:59	Portugal	Feminino	Atualmente a frequentar um curso de qualificação	1 - 2 anos	Numa área metropolitana	Não aplicável	Não aplicável	Não aplicável	Não aplicável	Não aplicável	Muito importante	Bastante importante	Bastante importante	Estudante
2025.28.5 20:46:55	Portugal	Feminino	Bacharelato	Mais de 10 anos	Numa pequena cidade	Inclusiva (a instituição implementa medidas de suporte à aprendizagem e à inclusão)	3 - 5 anos	21 - 25 crianças	2 - 4	Nenhum	Muito importante	Muito importante	Bastante importante	Educador/Educadora de Infância	Frequentemente	Sempre	Sempre	Frequentemente	Frequentemente	Frequentemente	Sempre	Sempre	Sempre	Frequentemente	Sempre	Frequentemente	Frequentemente	Por vezes	Frequentemente	Sempre	Frequentemente	Frequentemente	Frequentemente	Por vezes	Frequentemente	Frequentemente	Frequentemente	Frequentemente	Frequentemente	Por vezes	Por vezes	Frequentemente	Frequentemente	Frequentemente	Frequentemente	Frequentemente	Frequentemente	Frequentemente	Sempre
2025.28.5 20:49:32	Portugal	Feminino	Ensino superior profissional (nível 2)	Sem experiência	Não aplicável	Não aplicável	Não aplicável	Não aplicável	Não aplicável	Não aplicável	Muito importante	Muito importante	Muito importante	Estudante
2025.28.5 21:13:03	Portugal	Feminino	Mestrado	Mais de 10 anos	Numa pequena cidade	Inclusiva (a instituição implementa medidas de suporte à aprendizagem e à inclusão)	Grupos etários mistos	21 - 25 crianças	5 ou mais	Mais de 5 crianças	Muito importante	Muito importante	Muito importante	Educador/Educadora de Infância	Frequentemente	Frequentemente	Frequentemente	Frequentemente	Sempre	Sempre	Sempre	Sempre	Sempre	Frequentemente	Frequentemente	Frequentemente	Sempre	Frequentemente	Frequentemente	Sempre	Frequentemente	Frequentemente	Sempre	Sempre	Frequentemente	Frequentemente	Frequentemente	Frequentemente	Frequentemente	Frequentemente	Frequentemente	Sempre	Sempre	Frequentemente	Frequentemente	Frequentemente	Frequentemente	Frequentemente	Frequentemente
2025.28.5 21:49:35	Portugal	Feminino	Bacharelato	Mais de 10 anos	Numa pequena cidade	Inclusiva (a instituição implementa medidas de suporte à aprendizagem e à inclusão)	3 - 5 anos	16 - 20 crianças	1 - 2	3 - 5 crianças	Não é importante	Não é importante	Não é importante	Educador/Educadora de Infância	Frequentemente	Por vezes	Por vezes	Por vezes	Frequentemente	Frequentemente	Frequentemente	Frequentemente	Frequentemente	Frequentemente	Por vezes	Nunca	Frequentemente	Por vezes	Frequentemente	Por vezes	Por vezes	Frequentemente	Frequentemente	Frequentemente	Frequentemente	Frequentemente	Frequentemente	Sempre	Frequentemente	Frequentemente	Frequentemente	Frequentemente	Frequentemente	Frequentemente	Frequentemente	Frequentemente	Frequentemente	Frequentemente	Frequentemente
2025.28.5 23:11:15	Portugal	Feminino	Ensino superior profissional (nível 2)	Mais de 10 anos	Numa zona rural	Inclusiva (a instituição implementa medidas de suporte à aprendizagem e à inclusão)	6 - 8 anos	Não aplicável	Não aplicável	Mais de 5 crianças	Bastante importante	Bastante importante	Bastante importante	Educador/Educadora de Infância em formação	Frequentemente	Por vezes	Frequentemente	Frequentemente	Frequentemente	Frequentemente	Frequentemente	Por vezes	Frequentemente	Frequentemente	Frequentemente	Por vezes	Por vezes	Por vezes	Frequentemente	Por vezes	Por vezes	Por vezes	Frequentemente	Por vezes	Por vezes	Frequentemente	Frequentemente	Por vezes	Frequentemente	Por vezes	Por vezes	Frequentemente	Frequentemente	Por vezes	Por vezes	Por vezes	Por vezes	Por vezes	Por vezes
2025.28.5 23:41:49	Portugal	Feminino	Atualmente a frequentar um curso de qualificação	Sem experiência	Não aplicável	Não aplicável	Não aplicável	Não aplicável	Não aplicável	Não aplicável	Muito importante	Muito importante	Muito importante	Estudante
2025.29.5 00:20:37	Portugal	Feminino	Atualmente a frequentar um curso de qualificação	Sem experiência, 1 - 2 anos	Numa zona rural, Não aplicável	Inclusiva (a instituição implementa medidas de suporte à aprendizagem e à inclusão), Não aplicável	Não aplicável	Não aplicável	Não aplicável	Não aplicável	Neutro, sem opinião	Neutro, sem opinião	Neutro, sem opinião	Estudante
2025.29.5 00:58:50	Portugal	Feminino	Mestrado	Mais de 10 anos	Numa pequena cidade	Inclusiva (a instituição implementa medidas de suporte à aprendizagem e à inclusão)	6 - 8 anos	Não aplicável	1 - 2	3 - 5 crianças	Muito importante	Muito importante	Muito importante	Educador/Educadora de Infância	Sempre	Frequentemente	Frequentemente	Sempre	Frequentemente	Sempre	Frequentemente	Frequentemente	Frequentemente	Frequentemente	Frequentemente	Por vezes	Frequentemente	Frequentemente	Frequentemente	Frequentemente	Por vezes	Por vezes	Por vezes	Por vezes	Frequentemente	Frequentemente	Frequentemente	Frequentemente	Frequentemente	Por vezes	Por vezes	Sempre	Sempre	Frequentemente	Frequentemente	Frequentemente	Frequentemente	Sempre	Por vezes
2025.29.5 02:31:58	Portugal	Feminino	Ensino superior profissional (nível 2)	Mais de 10 anos	Numa pequena cidade	Inclusiva (a instituição implementa medidas de suporte à aprendizagem e à inclusão)	3 - 5 anos	16 - 20 crianças	1 - 2	1 - 2 crianças	Muito importante	Muito importante	Bastante importante	Educador/Educadora de Infância	Frequentemente	Frequentemente	Sempre	Frequentemente	Sempre	Frequentemente	Por vezes	Frequentemente	Sempre	Por vezes	Frequentemente	Por vezes	Por vezes	Nunca	Frequentemente	Por vezes	Nunca	Frequentemente	Por vezes	Por vezes	Por vezes	Frequentemente	Frequentemente	Frequentemente	Por vezes	Frequentemente	Nunca	Sempre	Sempre	Frequentemente	Por vezes	Nunca	Frequentemente	Sempre	Frequentemente
2025.29.5 07:54:01	Portugal	Feminino	Mestrado	Mais de 10 anos	Não aplicável	Inclusiva (a instituição implementa medidas de suporte à aprendizagem e à inclusão)	6 - 8 anos	Não aplicável	1 - 2	3 - 5 crianças	Bastante importante	Bastante importante	Bastante importante	Educador/Educadora de Infância	Frequentemente	Por vezes	Frequentemente	Frequentemente	Frequentemente	Por vezes	Frequentemente	Frequentemente	Sempre	Frequentemente	Frequentemente	Por vezes	Frequentemente	Frequentemente	Frequentemente	Frequentemente	Por vezes	Por vezes	Por vezes	Por vezes	Por vezes	Por vezes	Por vezes	Por vezes	Por vezes	Por vezes	Por vezes	Por vezes	Por vezes	Por vezes	Por vezes	Por vezes	Por vezes	Por vezes	Por vezes
2025.29.5 18:01:25	Portugal	Masculino	Atualmente a frequentar um curso de qualificação	Menos de um ano	Numa pequena cidade	Inclusiva (a instituição implementa medidas de suporte à aprendizagem e à inclusão)	3 - 5 anos	16 - 20 crianças		1 - 2 crianças	Bastante importante	Muito importante	Neutro, sem opinião	Educador/Educadora de Infância em formação	Frequentemente	Frequentemente	Sempre	Frequentemente	Por vezes	Frequentemente	Frequentemente	Frequentemente	Por vezes	Frequentemente	Sempre	Frequentemente	Sempre	Frequentemente	Frequentemente	Frequentemente	Frequentemente	Frequentemente	Sempre	Frequentemente	Frequentemente	Frequentemente	Frequentemente	Sempre	Sempre	Frequentemente	Frequentemente	Frequentemente	Frequentemente	Frequentemente	Frequentemente	Frequentemente	Frequentemente	Frequentemente	Frequentemente
2025.31.5 17:30:28	Portugal	Feminino	Mestrado	Mais de 10 anos	Numa pequena cidade	Inclusiva (a instituição implementa medidas de suporte à aprendizagem e à inclusão)	3 - 5 anos	21 - 25 crianças	2 - 4	Mais de 5 crianças	Muito importante	Muito importante	Muito importante	Educador/Educadora de Infância	Frequentemente	Frequentemente	Frequentemente	Por vezes	Frequentemente	Frequentemente	Sempre	Frequentemente	Sempre	Frequentemente	Frequentemente, Sempre	Por vezes	Por vezes	Frequentemente	Frequentemente	Sempre	Frequentemente	Frequentemente	Por vezes	Por vezes	Frequentemente	Frequentemente	Frequentemente	Frequentemente	Frequentemente	Frequentemente	Nunca, Por vezes	Por vezes	Sempre	Sempre	Por vezes	Por vezes	Frequentemente	Sempre	Por vezes
2025.31.5 23:56:45	Portugal	Feminino	Mestrado	Mais de 10 anos	Numa área metropolitana	Inclusiva (a instituição implementa medidas de suporte à aprendizagem e à inclusão)	3 - 5 anos	16 - 20 crianças	1 - 2	1 - 2 crianças	Muito importante	Sim não importa, Muito importante	Muito importante	Educador/Educadora de Infância	Sempre	Sempre	Sempre	Sempre	Sempre	Sempre	Frequentemente	Sempre	Sempre	Frequentemente	Frequentemente	Sempre	Frequentemente	Por vezes	Por vezes	Nunca	Sempre	Sempre	Por vezes	Sempre	Por vezes	Frequentemente	Frequentemente	Sempre	Sempre	Frequentemente	Por vezes	Sempre	Sempre	Sempre	Sempre	Sempre	Por vezes	Sempre	Sempre
2025.1.6 01:34:39	Portugal	Feminino	Ensino superior profissional (nível 1)	Mais de 10 anos	Numa área metropolitana	Inclusiva (a instituição implementa medidas de suporte à aprendizagem e à inclusão)	3 - 5 anos	16 - 20 crianças	1 - 2	1 - 2 crianças	Bastante importante	Bastante importante	Bastante importante	Educador/Educadora de Infância	Frequentemente	Por vezes	Frequentemente	Por vezes	Sempre	Frequentemente	Sempre	Frequentemente	Frequentemente	Frequentemente	Frequentemente	Por vezes	Por vezes	Por vezes	Por vezes	Frequentemente	Por vezes	Frequentemente	Por vezes	Por vezes	Por vezes	Por vezes	Frequentemente	Por vezes	Por vezes	Por vezes	Por vezes	Frequentemente	Frequentemente	Frequentemente	Por vezes	Por vezes	Por vezes	Nunca	Por vezes
2025.1.6 17:29:46	Portugal	Masculino	Ensino superior profissional (nível 2)	Mais de 10 anos	Numa pequena cidade	Inclusiva (a instituição implementa medidas de suporte à aprendizagem e à inclusão)	6 - 8 anos	21 - 25 crianças	1 - 2	1 - 2 crianças	Bastante importante	Muito importante	Bastante importante	Educador/Educadora de Infância	Frequentemente	Frequentemente	Frequentemente	Sempre	Frequentemente	Frequentemente	Frequentemente	Frequentemente	Frequentemente	Por vezes	Frequentemente	Por vezes	Por vezes	Frequentemente	Frequentemente	Por vezes	Por vezes	Frequentemente	Por vezes	Por vezes	Por vezes	Frequentemente	Sempre	Frequentemente	Frequentemente	Por vezes	Por vezes	Frequentemente	Frequentemente	Frequentemente	Por vezes	Por vezes	Por vezes	Por vezes	Frequentemente
2025.2.6 00:57:18	Portugal	Feminino	Mestrado	Mais de 10 anos	Numa pequena cidade	Não-inclusiva (a instituição não implementa medidas de suporte à aprendizagem e à inclusão)	1 - 3 anos	6 - 10 crianças	1 - 2	Nenhum	Muito importante	Muito importante	Muito importante	Educador/Educadora de Infância	Frequentemente	Sempre	Sempre	Sempre	Sempre	Frequentemente	Sempre	Sempre	Sempre	Frequentemente	Sempre	Sempre	Sempre	Frequentemente	Frequentemente	Frequentemente	Sempre	Sempre	Frequentemente	Sempre	Sempre	Frequentemente	Sempre	Sempre	Sempre	Sempre	Sempre	Sempre	Frequentemente, Sempre	Frequentemente	Sempre	Frequentemente	Sempre	Sempre	Frequentemente
2025.2.6 01:03:50	Portugal	Feminino	Mestrado	Mais de 10 anos	Numa área metropolitana	Inclusiva (a instituição implementa medidas de suporte à aprendizagem e à inclusão)	3 - 5 anos	16 - 20 crianças	1 - 2	1 - 2 crianças	Sim não importa, Muito importante	Muito importante	Muito importante	Educador/Educadora de Infância	Frequentemente	Frequentemente	Frequentemente	Por vezes	Frequentemente	Frequentemente	Frequentemente	Frequentemente	Frequentemente	Frequentemente	Frequentemente	Frequentemente	Por vezes	Frequentemente	Frequentemente	Frequentemente	Frequentemente	Frequentemente	Por vezes	Por vezes	Frequentemente		Frequentemente	Frequentemente	Por vezes	Por vezes	Por vezes	Frequentemente	Frequentemente	Frequentemente	Por vezes	Frequentemente	Frequentemente	Frequentemente	Frequentemente
2025.2.6 16:37:41	Portugal	Feminino	Mestrado	1 - 2 anos	Numa área metropolitana	Inclusiva (a instituição implementa medidas de suporte à aprendizagem e à inclusão)	0 - 12 meses, 1 - 3 anos, 3 - 5 anos	21 - 25 crianças	1 - 2	Nenhum	Bastante importante	Bastante importante	Bastante importante	Educador/Educadora de Infância	Por vezes	Frequentemente	Frequentemente	Frequentemente	Sempre	Frequentemente, Sempre	Sempre	Sempre	Sempre	Frequentemente	Sempre	Frequentemente	Por vezes	Frequentemente	Frequentemente	Frequentemente	Frequentemente	Por vezes, Frequentemente	Nunca, Por vezes	Por vezes	Por vezes	Por vezes	Por vezes	Por vezes	Frequentemente	Por vezes	Frequentemente	Frequentemente	Por vezes	Frequentemente	Frequentemente	Nunca	Por vezes	Frequentemente	Por vezes
2025.2.6 16:49:59	Portugal	Feminino	Mestrado	Mais de 10 anos	Numa área metropolitana	Inclusiva (a instituição implementa medidas de suporte à aprendizagem e à inclusão)	3 - 5 anos	16 - 20 crianças	1 - 2	3 - 5 crianças	Muito importante	Muito importante	Muito importante	Educador/Educadora de Infância	Por vezes	Por vezes	Por vezes	Nunca	Sempre	Sempre	Sempre	Sempre	Sempre	Frequentemente	Sempre	Por vezes	Sempre	Nunca	Por vezes	Por vezes	Por vezes	Frequentemente	Por vezes	Por vezes	Frequentemente	Frequentemente	Frequentemente	Frequentemente	Frequentemente	Por vezes	Nunca	Sempre	Frequentemente	Frequentemente	Por vezes	Por vezes	Frequentemente	Por vezes	Por vezes
2025.3.6 18:03:05	Portugal	Feminino	Ensino superior profissional (nível 2)	Mais de 10 anos	Numa pequena cidade	Inclusiva (a instituição implementa medidas de suporte à aprendizagem e à inclusão)	3 - 5 anos	16 - 20 crianças	1 - 2	3 - 5 crianças	Bastante importante	Bastante importante	Bastante importante	Educador/Educadora de Infância	Sempre	Frequentemente	Frequentemente	Frequentemente	Frequentemente	Sempre	Frequentemente	Frequentemente	Sempre	Frequentemente	Frequentemente	Por vezes	Por vezes	Por vezes	Frequentemente	Por vezes	Frequentemente	Frequentemente	Frequentemente	Frequentemente	Frequentemente	Frequentemente	Frequentemente	Frequentemente	Frequentemente	Frequentemente	Por vezes	Frequentemente	Frequentemente	Sempre	Por vezes	Por vezes	Por vezes	Frequentemente	Frequentemente
2025.3.6 18:25:30	Portugal	Masculino	Bacharelato	Mais de 10 anos	Numa zona rural	Inclusiva (a instituição implementa medidas de suporte à aprendizagem e à inclusão)	3 - 5 anos	6 - 10 crianças	1 - 2	1 - 2 crianças	Bastante importante	Bastante importante	Bastante importante	Educador/Educadora de Infância	Sempre	Sempre	Sempre	Sempre	Frequentemente	Frequentemente	Frequentemente	Frequentemente	Por vezes	Frequentemente	Frequentemente	Por vezes	Frequentemente	Frequentemente	Frequentemente	Frequentemente	Por vezes	Por vezes	Por vezes	Por vezes	Por vezes	Sempre	Frequentemente	Frequentemente	Frequentemente	Por vezes	Por vezes	Frequentemente	Frequentemente	Por vezes	Frequentemente	Frequentemente	Frequentemente	Frequentemente	Frequentemente
2025.5.6 00:39:10	Portugal	Feminino	Ensino superior profissional (nível 1)	Mais de 10 anos	Numa pequena cidade, Numa zona rural	Inclusiva (a instituição implementa medidas de suporte à aprendizagem e à inclusão)	3 - 5 anos	11 - 15 crianças	1 - 2	Nenhum		Bastante importante	Bastante importante	Educador/Educadora de Infância	Sempre	Frequentemente	Por vezes	Por vezes	Frequentemente	Frequentemente	Frequentemente	Frequentemente	Frequentemente	Frequentemente	Por vezes	Por vezes	Por vezes	Nunca	Por vezes	Nunca	Frequentemente	Frequentemente	Por vezes	Por vezes	Frequentemente	Frequentemente	Frequentemente	Frequentemente	Frequentemente	Nunca	Nunca	Por vezes	Frequentemente	Por vezes	Por vezes	Frequentemente	Frequentemente	Frequentemente	Por vezes
2025.6.6 15:54:36	Portugal	Feminino	Ensino superior profissional (nível 1)	Mais de 10 anos	Numa pequena cidade	Inclusiva (a instituição implementa medidas de suporte à aprendizagem e à inclusão)	3 - 5 anos	16 - 20 crianças	1 - 2	1 - 2 crianças	Bastante importante	Bastante importante	Bastante importante	Educador/Educadora de Infância	Frequentemente	Frequentemente	Frequentemente	Frequentemente	Frequentemente	Frequentemente	Frequentemente	Frequentemente	Frequentemente	Frequentemente	Frequentemente	Frequentemente	Frequentemente	Frequentemente	Frequentemente	Frequentemente	Frequentemente	Frequentemente	Frequentemente	Frequentemente	Frequentemente	Frequentemente	Frequentemente	Frequentemente	Frequentemente	Frequentemente	Frequentemente	Frequentemente	Frequentemente	Frequentemente	Frequentemente	Frequentemente	Frequentemente	Frequentemente	Frequentemente
2025.12.6 01:21:53	Portugal	Masculino	Atualmente a frequentar um curso de qualificação	Menos de um ano	Numa pequena cidade	Não-inclusiva (a instituição não implementa medidas de suporte à aprendizagem e à inclusão)	3 - 5 anos	6 - 10 crianças	1 - 2	Nenhum	Muito importante	Muito importante	Muito importante	Educador/Educadora de Infância em formação	Frequentemente	Frequentemente	Frequentemente	Frequentemente	Frequentemente	Frequentemente	Frequentemente	Frequentemente	Frequentemente	Frequentemente	Frequentemente	Frequentemente	Frequentemente	Frequentemente	Frequentemente	Frequentemente	Frequentemente	Frequentemente	Frequentemente	Frequentemente	Frequentemente	Frequentemente	Frequentemente	Frequentemente	Frequentemente	Frequentemente	Frequentemente	Frequentemente	Frequentemente	Frequentemente	Frequentemente	Frequentemente	Frequentemente	Frequentemente	Frequentemente
2025.14.6 18:48:56	Portugal	Feminino	Ensino superior profissional (nível 2)	Mais de 10 anos	Numa pequena cidade	Inclusiva (a instituição implementa medidas de suporte à aprendizagem e à inclusão)	3 - 5 anos	21 - 25 crianças	1 - 2	1 - 2 crianças	Não é importante	Não é importante	Não é importante	Educador/Educadora de Infância	Frequentemente	Frequentemente	Frequentemente	Frequentemente	Frequentemente	Frequentemente	Por vezes	Frequentemente	Frequentemente	Por vezes	Frequentemente	Por vezes	Frequentemente	Por vezes	Frequentemente	Frequentemente	Frequentemente	Frequentemente	Por vezes	Por vezes	Por vezes	Frequentemente	Frequentemente	Frequentemente	Frequentemente	Frequentemente	Por vezes	Frequentemente	Frequentemente	Frequentemente	Frequentemente	Por vezes	Por vezes	Frequentemente	Frequentemente
2025.15.6 22:55:31	Portugal	Feminino	Ensino superior profissional (nível 2)	Mais de 10 anos	Numa zona rural	Inclusiva (a instituição implementa medidas de suporte à aprendizagem e à inclusão)	3 - 5 anos	21 - 25 crianças	2 - 4	Mais de 5 crianças	Bastante importante	Bastante importante	Bastante importante	Educador/Educadora de Infância	Frequentemente	Frequentemente	Sempre	Sempre	Por vezes	Frequentemente	Frequentemente	Frequentemente	Frequentemente	Frequentemente	Frequentemente	Frequentemente	Frequentemente	Frequentemente	Frequentemente	Por vezes	Frequentemente	Frequentemente	Por vezes	Frequentemente	Frequentemente	Frequentemente	Frequentemente	Frequentemente	Frequentemente	Por vezes	Por vezes	Frequentemente	Frequentemente	Por vezes	Por vezes	Por vezes	Frequentemente	Por vezes	Por vezes
2025.16.6 03:14:41	Portugal	Feminino	Ensino superior profissional (nível 1)	Mais de 10 anos	Numa zona rural	Inclusiva (a instituição implementa medidas de suporte à aprendizagem e à inclusão)	3 - 5 anos	21 - 25 crianças	2 - 4	Nenhum	Bastante importante	Bastante importante	Bastante importante	Educador/Educadora de Infância	Frequentemente	Frequentemente	Sempre	Sempre	Sempre	Frequentemente	Frequentemente	Frequentemente	Sempre	Frequentemente	Frequentemente	Por vezes, Frequentemente	Frequentemente	Sempre	Sempre	Sempre	Frequentemente	Frequentemente	Por vezes	Por vezes	Frequentemente	Por vezes	Frequentemente	Frequentemente	Por vezes	Frequentemente	Frequentemente	Frequentemente	Frequentemente	Sempre	Frequentemente	Frequentemente	Frequentemente	Frequentemente	Frequentemente
2025.16.6 10:28:26	Portugal	Feminino	Mestrado	Mais de 10 anos	Numa zona rural	Inclusiva (a instituição implementa medidas de suporte à aprendizagem e à inclusão)	3 - 5 anos	11 - 15 crianças	1 - 2	1 - 2 crianças	Muito importante	Muito importante	Muito importante	Educador/Educadora de Infância em formação	Frequentemente	Frequentemente	Sempre	Sempre	Sempre	Sempre	Sempre	Sempre	Sempre	Frequentemente	Sempre	Frequentemente	Frequentemente	Frequentemente	Sempre	Sempre	Frequentemente	Sempre	Frequentemente	Sempre	Sempre	Sempre	Sempre	Sempre	Sempre	Frequentemente	Frequentemente	Sempre	Sempre	Frequentemente	Frequentemente	Por vezes	Frequentemente	Por vezes	Frequentemente
2025.16.6 14:45:55	Portugal	Feminino	Ensino superior profissional (nível 2)	Mais de 10 anos	Numa pequena cidade	Inclusiva (a instituição implementa medidas de suporte à aprendizagem e à inclusão)	3 - 5 anos	16 - 20 crianças	1 - 2	Nenhum	Bastante importante	Bastante importante	Bastante importante	Educador/Educadora de Infância	Sempre	Sempre	Sempre	Sempre	Sempre	Sempre	Sempre	Sempre	Sempre	Sempre	Sempre	Sempre	Sempre	Frequentemente	Sempre	Sempre	Frequentemente	Frequentemente	Sempre	Sempre	Sempre	Sempre	Sempre	Sempre	Sempre	Sempre	Sempre	Sempre	Sempre	Sempre	Sempre	Frequentemente	Frequentemente	Sempre	Sempre
2025.17.6 00:37:45	Portugal	Feminino	Ensino superior profissional (nível 1)	1 - 2 anos	Numa pequena cidade	Inclusiva (a instituição implementa medidas de suporte à aprendizagem e à inclusão)	1 - 3 anos	16 - 20 crianças	5 ou mais	1 - 2 crianças	Bastante importante	Bastante importante	Bastante importante	Estudante
2025.17.6 12:00:06	Portugal, Outros	Feminino	Ensino superior profissional (nível 1)	Menos de um ano	Não aplicável	Inclusiva (a instituição implementa medidas de suporte à aprendizagem e à inclusão)	1 - 3 anos, 3 - 5 anos, 6 - 8 anos	Não aplicável	Não aplicável	Não aplicável	Bastante importante	Neutro, sem opinião	Bastante importante	Estudante
2025.18.6 17:38:16	Portugal	Feminino	Bacharelato	Mais de 10 anos	Numa zona rural	Inclusiva (a instituição implementa medidas de suporte à aprendizagem e à inclusão)	Grupos etários mistos	11 - 15 crianças	1 - 2	1 - 2 crianças	Bastante importante	Bastante importante	Bastante importante	Educador/Educadora de Infância	Frequentemente	Frequentemente		Frequentemente	Frequentemente	Frequentemente	Frequentemente	Sempre	Frequentemente	Frequentemente	Frequentemente	Frequentemente	Frequentemente	Frequentemente	Frequentemente	Frequentemente	Frequentemente	Frequentemente	Frequentemente	Frequentemente	Frequentemente	Frequentemente	Frequentemente	Frequentemente	Frequentemente	Frequentemente	Frequentemente	Frequentemente	Frequentemente	Frequentemente	Frequentemente	Frequentemente	Frequentemente	Frequentemente	Frequentemente
2025.7.7 12:56:29	Portugal	Feminino	Ensino superior profissional (nível 1)	Mais de 10 anos	Numa zona rural	Não aplicável	3 - 5 anos	1 - 5 crianças	2 - 4	Não aplicável	Bastante importante	Bastante importante	Bastante importante	Educador/Educadora de Infância	Sempre	Frequentemente	Sempre	Nunca	Sempre	Sempre	Sempre	Sempre	Sempre	Sempre	Sempre	Frequentemente	Frequentemente	Frequentemente	Frequentemente	Frequentemente	Frequentemente	Frequentemente	Frequentemente	Frequentemente	Frequentemente	Frequentemente	Frequentemente	Frequentemente	Frequentemente	Frequentemente	Por vezes	Sempre	Sempre	Frequentemente	Frequentemente	Frequentemente	Por vezes	Por vezes	Frequentemente
2025.7.7 13:27:54	Portugal	Masculino	Mestrado	Mais de 10 anos	Numa zona rural	Inclusiva (a instituição implementa medidas de suporte à aprendizagem e à inclusão)	3 - 5 anos	6 - 10 crianças	1 - 2	1 - 2 crianças	Bastante importante	Bastante importante	Bastante importante	Educador/Educadora de Infância	Frequentemente	Frequentemente	Frequentemente	Frequentemente	Frequentemente	Frequentemente	Frequentemente	Frequentemente	Frequentemente	Frequentemente	Frequentemente	Frequentemente	Frequentemente	Frequentemente	Frequentemente	Frequentemente	Frequentemente	Frequentemente	Frequentemente	Frequentemente	Frequentemente	Frequentemente	Frequentemente	Frequentemente	Frequentemente	Frequentemente	Frequentemente	Frequentemente	Frequentemente	Frequentemente	Frequentemente	Frequentemente	Frequentemente	Frequentemente	Frequentemente
2025.8.7 00:17:40	Portugal	Feminino	Ensino superior profissional (nível 2)	Mais de 10 anos	Numa pequena cidade	Inclusiva (a instituição implementa medidas de suporte à aprendizagem e à inclusão)	3 - 5 anos	16 - 20 crianças	1 - 2	1 - 2 crianças	Muito importante	Bastante importante	Muito importante	Educador/Educadora de Infância	Frequentemente	Sempre	Frequentemente	Nunca	Frequentemente	Frequentemente	Frequentemente	Sempre	Frequentemente	Frequentemente	Por vezes	Por vezes	Frequentemente	Frequentemente	Frequentemente	Nunca	Frequentemente	Frequentemente	Nunca	Nunca	Por vezes	Por vezes, Sempre	Frequentemente	Frequentemente	Por vezes		Nunca	Sempre	Sempre	Sempre	Nunca	Frequentemente	Por vezes	Frequentemente	Por vezes
2025.8.7 17:33:45	Portugal	Feminino	Atualmente a frequentar um curso de qualificação	6 - 10 anos	Numa área metropolitana	Inclusiva (a instituição implementa medidas de suporte à aprendizagem e à inclusão)	3 - 5 anos	16 - 20 crianças	2 - 4	1 - 2 crianças	Bastante importante	Bastante importante	Bastante importante	Educador/Educadora de Infância	Frequentemente	Frequentemente	Frequentemente	Frequentemente	Frequentemente	Frequentemente	Frequentemente	Frequentemente	Frequentemente	Frequentemente	Frequentemente	Frequentemente	Frequentemente	Frequentemente	Frequentemente	Frequentemente	Frequentemente	Frequentemente	Frequentemente	Frequentemente	Frequentemente	Sempre	Frequentemente	Frequentemente	Frequentemente	Frequentemente	Frequentemente	Frequentemente	Frequentemente	Frequentemente	Frequentemente	Frequentemente	Frequentemente	Frequentemente	Frequentemente
2025.8.7 17:56:46	Portugal	Feminino	Bacharelato	Mais de 10 anos	Numa pequena cidade	Inclusiva (a instituição implementa medidas de suporte à aprendizagem e à inclusão)	3 - 5 anos	16 - 20 crianças	2 - 4	1 - 2 crianças	Bastante importante	Bastante importante	Bastante importante	Educador/Educadora de Infância	Frequentemente	Sempre	Frequentemente	Frequentemente	Frequentemente	Por vezes	Por vezes	Frequentemente	Por vezes	Por vezes	Frequentemente	Por vezes	Frequentemente	Por vezes	Por vezes	Por vezes	Frequentemente	Frequentemente	Por vezes	Por vezes	Frequentemente	Por vezes	Frequentemente	Frequentemente		Por vezes	Por vezes	Frequentemente	Frequentemente	Frequentemente	Frequentemente	Frequentemente	Frequentemente	Frequentemente	Frequentemente
2025.10.7 01:29:11	Portugal	Feminino	Bacharelato	Mais de 10 anos	Numa área metropolitana	Inclusiva (a instituição implementa medidas de suporte à aprendizagem e à inclusão)	3 - 5 anos	21 - 25 crianças	2 - 4	1 - 2 crianças	Bastante importante	Bastante importante	Bastante importante	Educador/Educadora de Infância em formação	Por vezes	Frequentemente	Frequentemente	Frequentemente	Frequentemente	Frequentemente	Frequentemente	Frequentemente	Frequentemente	Frequentemente	Frequentemente	Frequentemente	Frequentemente	Frequentemente	Frequentemente	Frequentemente	Frequentemente	Frequentemente	Frequentemente	Frequentemente	Frequentemente	Frequentemente	Frequentemente	Frequentemente	Frequentemente	Frequentemente	Frequentemente	Frequentemente	Frequentemente	Frequentemente	Frequentemente	Frequentemente	Frequentemente	Frequentemente	Frequentemente
2025.14.7 18:33:27	Portugal	Masculino	Mestrado	Sem experiência	Numa área metropolitana	Inclusiva (a instituição implementa medidas de suporte à aprendizagem e à inclusão)	3 - 5 anos	21 - 25 crianças	2 - 4	1 - 2 crianças	Bastante importante	Bastante importante	Bastante importante	Educador/Educadora de Infância	Frequentemente	Frequentemente	Frequentemente	Frequentemente	Frequentemente	Frequentemente	Frequentemente	Frequentemente	Frequentemente	Frequentemente	Frequentemente	Frequentemente	Frequentemente	Frequentemente	Frequentemente	Frequentemente	Frequentemente	Frequentemente	Frequentemente	Frequentemente	Frequentemente	Frequentemente	Frequentemente	Frequentemente	Frequentemente	Frequentemente	Frequentemente	Frequentemente	Frequentemente	Frequentemente	Frequentemente	Frequentemente	Frequentemente	Frequentemente	Frequentemente
2025.14.7 20:21:10	Portugal	Feminino	Ensino superior profissional (nível 2)	Mais de 10 anos	Numa zona rural	Inclusiva (a instituição implementa medidas de suporte à aprendizagem e à inclusão)	3 - 5 anos	21 - 25 crianças	1 - 2	Nenhum	Muito importante	Muito importante	Muito importante	Educador/Educadora de Infância	Frequentemente	Frequentemente	Frequentemente	Nunca	Frequentemente	Frequentemente	Frequentemente	Frequentemente	Frequentemente	Frequentemente	Frequentemente	Frequentemente	Por vezes	Por vezes	Frequentemente	Por vezes	Frequentemente	Frequentemente	Nunca	Frequentemente	Frequentemente	Frequentemente	Frequentemente	Frequentemente	Por vezes	Frequentemente	Por vezes	Frequentemente	Frequentemente	Frequentemente	Frequentemente	Frequentemente	Por vezes	Nunca	Frequentemente
2025.15.7 00:10:32	Portugal	Feminino	Mestrado	Menos de um ano	Numa pequena cidade	Inclusiva (a instituição implementa medidas de suporte à aprendizagem e à inclusão)	0 - 12 meses, 1 - 3 anos	16 - 20 crianças	1 - 2	Não aplicável	Muito importante	Bastante importante	Bastante importante	Educador/Educadora de Infância	Frequentemente	Frequentemente	Frequentemente	Sempre	Frequentemente	Frequentemente	Frequentemente	Frequentemente	Frequentemente	Frequentemente	Frequentemente	Frequentemente	Frequentemente	Frequentemente	Frequentemente	Sempre	Frequentemente	Frequentemente	Frequentemente	Frequentemente	Frequentemente	Por vezes	Frequentemente	Frequentemente	Por vezes	Por vezes	Por vezes	Frequentemente	Sempre	Frequentemente	Por vezes	Por vezes	Por vezes	Frequentemente	Frequentemente
2025.15.7 04:54:08	Portugal	Feminino	Ensino superior profissional (nível 1)	Mais de 10 anos	Numa pequena cidade	Não-inclusiva (a instituição não implementa medidas de suporte à aprendizagem e à inclusão)	1 - 3 anos, 3 - 5 anos	21 - 25 crianças	1 - 2	Nenhum	Muito importante	Muito importante	Muito importante	Educador/Educadora de Infância	Por vezes	Por vezes	Por vezes	Nunca	Por vezes	Por vezes	Por vezes	Frequentemente	Frequentemente	Por vezes	Por vezes	Por vezes	Por vezes	Por vezes	Por vezes	Por vezes	Por vezes	Por vezes	Por vezes	Por vezes	Por vezes	Por vezes	Por vezes	Por vezes	Por vezes	Frequentemente	Nunca	Por vezes	Por vezes	Por vezes	Nunca	Por vezes	Por vezes	Frequentemente	Por vezes
2025.16.7 11:35:03	Portugal	Feminino	Mestrado	6 - 10 anos	Numa zona rural	Inclusiva (a instituição implementa medidas de suporte à aprendizagem e à inclusão)	3 - 5 anos	11 - 15 crianças	1 - 2	1 - 2 crianças	Bastante importante	Bastante importante	Bastante importante	Educador/Educadora de Infância	Frequentemente	Frequentemente	Frequentemente	Frequentemente	Frequentemente	Frequentemente	Frequentemente	Frequentemente	Frequentemente	Por vezes	Frequentemente	Frequentemente	Frequentemente	Frequentemente	Frequentemente	Frequentemente	Frequentemente	Frequentemente	Frequentemente	Frequentemente	Frequentemente	Frequentemente	Frequentemente	Frequentemente	Por vezes	Frequentemente	Frequentemente	Frequentemente	Frequentemente	Frequentemente	Frequentemente	Frequentemente	Frequentemente	Frequentemente	Frequentemente
2025.16.7 11:37:58	Portugal	Feminino	Bacharelato	3 - 5 anos	Numa área metropolitana	Inclusiva (a instituição implementa medidas de suporte à aprendizagem e à inclusão)	3 - 5 anos	16 - 20 crianças	2 - 4	1 - 2 crianças	Bastante importante	Neutro, sem opinião	Bastante importante	Educador/Educadora de Infância	Por vezes	Frequentemente	Por vezes	Por vezes	Frequentemente	Frequentemente	Frequentemente	Frequentemente	Frequentemente	Frequentemente	Frequentemente	Frequentemente	Frequentemente	Frequentemente	Frequentemente	Frequentemente	Frequentemente	Frequentemente	Frequentemente	Frequentemente	Frequentemente	Frequentemente	Frequentemente	Frequentemente	Frequentemente	Frequentemente	Frequentemente	Frequentemente	Frequentemente	Frequentemente	Frequentemente	Frequentemente	Frequentemente	Frequentemente	Frequentemente
2025.16.7 13:11:29	Portugal	Feminino	Atualmente a frequentar um curso de qualificação	Menos de um ano	Numa pequena cidade	Não-inclusiva (a instituição não implementa medidas de suporte à aprendizagem e à inclusão)	3 - 5 anos	16 - 20 crianças	1 - 2	1 - 2 crianças	Bastante importante	Bastante importante	Bastante importante	Estudante
2025.23.7 14:58:02	Portugal	Feminino	Mestrado	6 - 10 anos	Numa zona rural	Inclusiva (a instituição implementa medidas de suporte à aprendizagem e à inclusão)	Grupos etários mistos	11 - 15 crianças	1 - 2	Nenhum	Bastante importante	Bastante importante	Bastante importante	Educador/Educadora de Infância	Frequentemente	Frequentemente	Frequentemente	Frequentemente	Frequentemente	Frequentemente	Frequentemente	Frequentemente	Frequentemente	Frequentemente	Frequentemente	Frequentemente	Frequentemente	Frequentemente	Frequentemente	Frequentemente	Frequentemente	Frequentemente	Frequentemente	Frequentemente	Frequentemente	Frequentemente	Frequentemente	Frequentemente	Frequentemente	Frequentemente	Frequentemente	Frequentemente	Frequentemente	Frequentemente	Frequentemente	Frequentemente	Frequentemente	Frequentemente	Frequentemente
2025.23.7 15:00:12	Portugal	Feminino	Mestrado	6 - 10 anos	Numa zona rural	Inclusiva (a instituição implementa medidas de suporte à aprendizagem e à inclusão)	Grupos etários mistos	11 - 15 crianças	1 - 2	1 - 2 crianças	Bastante importante	Bastante importante	Bastante importante	Educador/Educadora de Infância	Frequentemente	Frequentemente	Sempre	Sempre	Frequentemente	Sempre	Frequentemente	Sempre	Frequentemente	Frequentemente	Frequentemente	Sempre	Sempre	Frequentemente	Frequentemente	Frequentemente	Frequentemente	Por vezes	Por vezes	Frequentemente	Frequentemente	Frequentemente	Frequentemente	Frequentemente	Frequentemente	Frequentemente	Por vezes	Frequentemente	Por vezes	Frequentemente	Frequentemente	Frequentemente	Frequentemente	Frequentemente	Por vezes
2025.23.7 15:02:17	Portugal	Feminino	Mestrado	6 - 10 anos	Numa pequena cidade	Inclusiva (a instituição implementa medidas de suporte à aprendizagem e à inclusão)	3 - 5 anos	16 - 20 crianças	2 - 4	1 - 2 crianças	Bastante importante	Bastante importante	Muito importante	Educador/Educadora de Infância	Frequentemente	Frequentemente	Frequentemente	Sempre	Frequentemente	Frequentemente	Por vezes	Frequentemente	Frequentemente	Frequentemente	Por vezes	Frequentemente	Frequentemente	Frequentemente	Frequentemente	Frequentemente	Frequentemente	Frequentemente	Frequentemente	Por vezes	Frequentemente	Frequentemente	Frequentemente	Frequentemente	Frequentemente	Frequentemente	Frequentemente	Frequentemente	Frequentemente	Frequentemente	Frequentemente	Frequentemente	Frequentemente	Frequentemente	Frequentemente
2025.23.7 15:04:13	Portugal	Feminino	Mestrado	6 - 10 anos	Numa pequena cidade	Inclusiva (a instituição implementa medidas de suporte à aprendizagem e à inclusão)	3 - 5 anos	21 - 25 crianças	2 - 4	1 - 2 crianças	Bastante importante	Bastante importante	Bastante importante	Educador/Educadora de Infância em formação	Frequentemente	Frequentemente	Frequentemente	Sempre	Frequentemente	Por vezes	Sempre	Por vezes	Sempre	Frequentemente	Frequentemente	Frequentemente	Frequentemente	Frequentemente	Por vezes	Por vezes	Frequentemente	Frequentemente	Frequentemente	Frequentemente	Frequentemente	Frequentemente	Frequentemente	Frequentemente	Por vezes	Frequentemente	Frequentemente	Frequentemente	Frequentemente	Sempre	Frequentemente	Frequentemente	Frequentemente	Frequentemente	Frequentemente
[truncated: 41 more columns]
