# Supplementary material
Source: Research Square preprint supplement (doi:10.21203/rs.3.rs-9452587/v1)
Supplement: Supplementary file 4 [file 5dc0afadc126a9fa08722863.pdf]

Umfrage zur Gewährleistung einer inklusiven Bildung. Vielen Dank, dass Sie sich bereit erklärt haben, diese Umfrage auszufüllen! Unser Ziel ist es, zu verstehen, wie die Prinzipien des Universelles Design für Lernen (UDL) angewendet werden, um ein inklusives Bildungsumfeld zu fördern. Ziel dieser Studie ist es, die Qualität der inklusiven Vorschulerziehung in Österreich, der Tschechischen Republik, Lettland und Portugal auf der Grundlage von UDL-Prinzipien zu bewerten und das Verständnis der ErzieherInnen für effektive Praktiken zu beurteilen. Ihre Antworten werden anonym sein, und wir werden keine persönlichen Informationen sammeln, die Sie identifizieren könnten. Die gesammelten Informationen werden ausschließlich zu Forschungszwecken verwendet und mit den Antworten der anderen Teilnehmer zusammengeführt. Das Ausfüllen der Umfrage wird etwa 10-20 Minuten in

# Anspruch nehmen. Ihre Angaben sind für uns von entscheidender Bedeutung und werden dazu beitragen, die Bildungserfahrung für Kinder im Vorschulalter zu verbessern.rundsätze des Universelles Design für Lernen (UDL)

Vielen Dank, dass Sie sich bereit erklärt haben, diese Umfrage auszufüllen! Unser Ziel ist es, zu verstehen, wie die Prinzipien des Universelles Design für Lernen (UDL) angewendet werden, um ein inklusives Bildungsumfeld zu fördern. Ziel dieser Studie ist es, die Qualität der inklusiven Vorschulerziehung in Österreich, der Tschechischen Republik, Lettland und Portugal auf der Grundlage von UDL-Prinzipien zu bewerten und das Verständnis der ErzieherInnen für effektive Praktiken zu beurteilen. Ihre Antworten werden anonym sein, und wir werden keine persönlichen Informationen sammeln, die Sie identifizieren könnten. Die gesammelten Informationen werden ausschließlich zu Forschungszwecken verwendet und mit den Antworten der anderen Teilnehmer zusammengeführt. Das Ausfüllen der Umfrage wird etwa 10-20 Minuten in Anspruch nehmen. Ihre Angaben sind für uns von entscheidender Bedeutung und werden dazu beitragen, die Bildungserfahrung für Kinder im Vorschulalter zu verbessern.

*\*Norāda nepieciešamo jautājumu*

Unbenannter Abschnitt

## 1. Demografische Daten

### 1. 1.1. Valsts \*

*Atzīmējiet visus atbilstošos variantus.*

Österreich

Česká republika

Latvija

Portugal

Cits

Citas: \_\_\_\_\_

2. 1.1.1 Bundesland

---

3. 1.2. **Geschlecht** \*

*Atzīmējiet visus atbilstošos variantus.*

- Weiblich
- Männlich
- Ich möchte nicht antworten

4. 1.3. **Was ist Ihr höchster akademischer Abschluss?** \*

*Atzīmējiet visus atbilstošos variantus.*

- Derzeitige Qualifizierung
- Berufliche Hochschulbildung (Stufe 1)
- Bachelor-Abschluss
- Berufliche Hochschulbildung (Stufe 2)
- Master-Abschluss
- Dokortitel

5. 1.4. **Berufserfahrung (in Jahren):** \*

*Atzīmējiet visus atbilstošos variantus.*

- Keine Erfahrung
- Weniger als ein Jahr
- 1 - 2 Jahre
- 3 - 6 Jahre
- 6 - 10 Jahre
- Mehr als 10 Jahre

**6. 1.5. Arbeitsort: \***

*Atzīmējiet visus atbilstošos variantus.*

- In einem Ballungsgebiet
- In einer Kleinstadt
- In einem ländlichen Gebiet
- Nicht anwendbar

**7. 1.6. Wie beurteilen Sie die vorschulische Bildungseinrichtung, in der Sie arbeiten, im Hinblick auf die Umsetzung integrativer Bildungspraktiken?**

*Atzīmējiet visus atbilstošos variantus.*

- Inklusion (die Einrichtung führt spezielle Bildungsprogramme durch)
- Nicht inklusiv (die Einrichtung führt keine speziellen Bildungsprogramme durch)
- Nicht anwendbar

**8. 1.7. Altersgruppe der Kinder, mit denen Sie täglich arbeiten:**

*Atzīmējiet visus atbilstošos variantus.*

- 0 - 12 Monate
- 1 - 3 Jahre
- 3 - 6 Jahre
- 6 - 8 Jahre
- Gemischte Altersgruppen
- Nicht anwendbar

**9. 1.8. Wie viele Kinder sind derzeit in Ihrer Gruppe eingeschrieben?**

*Atzīmējiet visus atbilstošos variantus.*

- 1 - 5 Kinder
- 6 - 10 Kinder
- 11 - 15 Kinder
- 16 - 20 Kinder
- 21 - 25 Kinder
- 26 oder mehr Kinder
- Nicht anwendbar

**10. 1.9. Wie viele Lehrer\*innen/Pädagog\*innen, Lehrerhelfer\*innen/Betreuer\*innen oder Assistenten arbeiten täglich in Ihrer Gruppe?**

*Atzīmējiet visus atbilstošos variantus.*

- 1 - 2
- 2 - 4
- 5 oder mehr
- Nicht anwendbar

**11. 1.10. Wie viele Kinder in Ihrer Gruppe sind in einem Sonderschulprogramm eingeschrieben bzw. haben einen "Inklusions-Bescheid" oder eine zusätzliche Förderung?**

*Atzīmējiet visus atbilstošos variantus.*

- Keine
- 1 - 2 Kinder
- 3 - 5 Kinder
- Mehr als 5 Kinder
- Nicht anwendbar

12. 1.11. Bitte bewerten Sie die Bedeutung der folgenden auf den UDL-Prinzipien basierenden Aspekte für die Förderung eines inklusiven Lernumfelds:

*Atzīmējiet visus atbilstošos variantus.*

|                                                                                   | Nicht wichtig            | Eher unwichtig           | Neutral, keine Meinung   | Ziemlich wichtig         | Sehr wichtig             |
|-----------------------------------------------------------------------------------|--------------------------|--------------------------|--------------------------|--------------------------|--------------------------|
| <b>Kinder durch verschiedene Methoden in Aktivitäten einbinden</b>                | <input type="checkbox"/> |
| <b>Präsentation von Informationen mit Hilfe verschiedener Materialien</b>         | <input type="checkbox"/> |
| <b>Ausdruck und Bewertung der erworbenen Kenntnisse mit verschiedenen Mitteln</b> | <input type="checkbox"/> |

13. 1.12. Bitte geben Sie Ihre derzeitige Qualifikation an, um die Fragen im folgenden Abschnitt zu beantworten und die von den UDL-Prinzipien umfassten Lehrmethoden und -strategien zu bewerten:

*Atzīmējiet tikai vienu variantu.*

- Lehrer\*in/Pädagog\*in *Pārejiet uz 14. jautājumu*
- Student\*in *Pārejiet uz 25. jautājumu*
- Lehrer im Vorbereitungsdienst *Pārejiet uz 14. jautājumu*
- Inklusionspädagog\*in

**Bewertung der UDL-Prinzipien für Lehrer\*innen/Pädagog\*innen**

**2. Einsatz verschiedener Engagement-Methoden**

Bitte schätzen Sie ein, wie oft Sie die folgenden Methoden in der Vorschulerziehung anwenden:

**14. 2.1. Wohlvollende Interessen und Identitäten:***Atzīmējiet visus atbilstošos variantus.*

|                                                                                                                                                                                                                                                                                                                         | Niemals                  | Manchmal                 | Häufig                   | Immer                    |
|-------------------------------------------------------------------------------------------------------------------------------------------------------------------------------------------------------------------------------------------------------------------------------------------------------------------------|--------------------------|--------------------------|--------------------------|--------------------------|
| <b>2.1.1. Auswahl von Lernzielen und Aufgaben auf der Grundlage der individuellen Interessen, des kulturellen Kontexts, des Geschlechts, der Altersgruppe und der Fähigkeiten der Kinder (z. B. Wahlmöglichkeiten für die Darstellung der Ergebnisse in Form von Zeichnungen, Skulpturen, Videos oder Audiodateien)</b> | <input type="checkbox"/> | <input type="checkbox"/> | <input type="checkbox"/> | <input type="checkbox"/> |
| <b>2.1.2. Aktivitäten, die auf Spielen und praktischen Erfahrungen basieren (z. B. Rollenspiele und Exkursionen in verschiedenen Umgebungen - drinnen und draußen)</b>                                                                                                                                                  | <input type="checkbox"/> | <input type="checkbox"/> | <input type="checkbox"/> | <input type="checkbox"/> |
| <b>2.1.3. Förderung der Freude an den Aktivitäten und Aufgaben (z. B. durch Überraschungen oder Entdeckungen während der Aktivitäten)</b>                                                                                                                                                                               | <input type="checkbox"/> | <input type="checkbox"/> | <input type="checkbox"/> | <input type="checkbox"/> |
| <b>2.1.4. Schaffung einer Umgebung, die den verschiedenen emotionalen und sensorischen Bedürfnissen des Kindes Rechnung trägt (z. B. Erkundung verschiedener Ideen und Fragen, Bereitstellung von Kopfhörern mit Geräuscherdrückung oder angepasster Beleuchtung)</b>                                                   | <input type="checkbox"/> | <input type="checkbox"/> | <input type="checkbox"/> | <input type="checkbox"/> |

**15. 2.2. Nachhaltige Anstrengung und Ausdauer***Atzīmējiet visus atbilstošos variantus.*

|                                                                                                                                                                              | Niemals                  | Manchmal                 | Häufig                   | Immer                    |
|------------------------------------------------------------------------------------------------------------------------------------------------------------------------------|--------------------------|--------------------------|--------------------------|--------------------------|
| <b>2.2.1. Erklären des Zwecks der Aktivitäten (z. B. den Kindern erklären, warum sie durch Brettspiele und Rollenspiele das Teilen lernen)</b>                               | <input type="checkbox"/> | <input type="checkbox"/> | <input type="checkbox"/> | <input type="checkbox"/> |
| <b>2.2.2. Verschiedene Schwierigkeitsgrade (z. B. Aufgaben mit unterschiedlichem Schwierigkeitsgrad und unterschiedlicher Komplexität für verschiedene Fähigkeitsstufen)</b> | <input type="checkbox"/> | <input type="checkbox"/> | <input type="checkbox"/> | <input type="checkbox"/> |
| <b>2.2.3. Förderung der Teamarbeit (z. B. Ermutigung der Kinder, gemeinsam an Projekten oder Aufgaben zu arbeiten)</b>                                                       | <input type="checkbox"/> | <input type="checkbox"/> | <input type="checkbox"/> | <input type="checkbox"/> |
| <b>2.2.4. Förderung des Zugehörigkeitsgefühls (z. B. durch den Austausch von Erfahrungen, die mit den zu lernenden Konzepten zusammenhängen)</b>                             | <input type="checkbox"/> | <input type="checkbox"/> | <input type="checkbox"/> | <input type="checkbox"/> |
| <b>2.2.5. Konkretes, praktisches Rückmeldung geben (z. B. einem Kind sagen: "Mir gefällt, wie du dein Spielzeug mit deinem Freund geteilt hast!")</b>                        | <input type="checkbox"/> | <input type="checkbox"/> | <input type="checkbox"/> | <input type="checkbox"/> |

## 16. 2.3. Emotionale Kapazität

*Atzīmējiet visus atbilstošos variantus.*

|                                                                                                                                                                                                                                                              | Niemals                  | Manchmal                 | Häufig                   | Immer                    |
|--------------------------------------------------------------------------------------------------------------------------------------------------------------------------------------------------------------------------------------------------------------|--------------------------|--------------------------|--------------------------|--------------------------|
| <b>2.3.1. Das Bewusstsein für die Erwartungen der Kinder und die Förderung der Motivation für Aktivitäten (z. B. die Frage, was sie lesen können, wenn sie Lesen und Schreiben lernen, oder was die Belohnung für die Erfüllung einer Aufgabe sein wird)</b> | <input type="checkbox"/> | <input type="checkbox"/> | <input type="checkbox"/> | <input type="checkbox"/> |
| <b>2.3.2. Entwicklung der Fähigkeit, Emotionen auszudrücken und sich selbst zu regulieren (z. B. Emotionen mit Emojis ausdrücken oder Verhaltensweisen durch Rollenspiele erlernen)</b>                                                                      | <input type="checkbox"/> | <input type="checkbox"/> | <input type="checkbox"/> | <input type="checkbox"/> |
| <b>2.3.3. Bewertung der eigenen Leistung und des eigenen Fortschritts (z. B. Erstellung von Tabellen, um die Anzahl der gelernten Buchstaben oder Symbole über einen bestimmten Zeitraum zu verfolgen)</b>                                                   | <input type="checkbox"/> | <input type="checkbox"/> | <input type="checkbox"/> | <input type="checkbox"/> |
| <b>2.3.4. Einfühlungsvermögen durch Diskussionen und Rollenspiele vorleben (z. B. durch Diskussionen oder Rollenspiele, um ein einfühlsames Verständnis zu fördern)</b>                                                                                      | <input type="checkbox"/> | <input type="checkbox"/> | <input type="checkbox"/> | <input type="checkbox"/> |

## 3. Verwendung verschiedener Darstellungsmittel

Bitte schätzen Sie ein, wie häufig Sie die folgenden Darstellungsmittel in der Vorschulerziehung einsetzen

## 17. 3.1. Wahrnehmung

*Atzīmējiet visus atbilstošos variantus.*

|                                                                                                                                             | Niemals                  | Manchmal                 | Häufig                   | Immer                    |
|---------------------------------------------------------------------------------------------------------------------------------------------|--------------------------|--------------------------|--------------------------|--------------------------|
| <b>3.1.1. Anpassung der Informationsdarstellung (z. B. digitale Hilfsmittel mit Anpassung von Schriftgröße und Farbkontrast)</b>            | <input type="checkbox"/> | <input type="checkbox"/> | <input type="checkbox"/> | <input type="checkbox"/> |
| <b>3.1.2. Bereitstellung von Informationen in verschiedenen Formaten (z. B. mit Videos, Audiomaterialien und Bewegungsaktivitäten)</b>      | <input type="checkbox"/> | <input type="checkbox"/> | <input type="checkbox"/> | <input type="checkbox"/> |
| <b>3.1.3. Authentische Darstellung des Themas (z. B. Erzählungen über verschiedene Sprachen und Kulturen in einem historischen Kontext)</b> | <input type="checkbox"/> | <input type="checkbox"/> | <input type="checkbox"/> | <input type="checkbox"/> |

## 18. 3.2. Sprache und Symbole

*Atzīmējiet visus atbilstošos variantus.*

|                                                                                                                                                                                                | Niemals                  | Manchmal                 | Häufig                   | Immer                    |
|------------------------------------------------------------------------------------------------------------------------------------------------------------------------------------------------|--------------------------|--------------------------|--------------------------|--------------------------|
| <b>3.2.1. Förderung des Verständnisses von Wörtern, Symbolen und Zahlen in verschiedenen Formaten (z. B. Erstellen von Diagrammen und Tabellen)</b>                                            | <input type="checkbox"/> | <input type="checkbox"/> | <input type="checkbox"/> | <input type="checkbox"/> |
| <b>3.2.2. Förderung des Verständnisses von Symbolen und Zahlen durch praktische Aktivitäten</b>                                                                                                | <input type="checkbox"/> | <input type="checkbox"/> | <input type="checkbox"/> | <input type="checkbox"/> |
| <b>3.2.3. Reflexion von Konzepten durch verschiedene Kulturen, Sprachen und Dialekte (z. B. Erklärung von Konzepten in verschiedenen Sprachen und Symbolen)</b>                                | <input type="checkbox"/> | <input type="checkbox"/> | <input type="checkbox"/> | <input type="checkbox"/> |
| <b>3.2.4. Beseitigung von Stereotypen über verschiedene Sprachen und Kommunikationsmittel (z. B. Erlernen von Symbolen und Ausdrucksmitteln, Wörtern und Sätzen in verschiedenen Sprachen)</b> | <input type="checkbox"/> | <input type="checkbox"/> | <input type="checkbox"/> | <input type="checkbox"/> |
| <b>3.2.5. Darstellung des Themas mit verschiedenen Darstellungsmitteln (z. B. durch Videos, Grafiken und interaktive Aktivitäten)</b>                                                          | <input type="checkbox"/> | <input type="checkbox"/> | <input type="checkbox"/> | <input type="checkbox"/> |

### 19. 3.3. Wissen aufbauen

*Atzīmējiet visus atbilstošos variantus.*

|                                                                                                                                                                                                                 | Niemals                  | Manchmal                 | Häufig                   | Immer                    |
|-----------------------------------------------------------------------------------------------------------------------------------------------------------------------------------------------------------------|--------------------------|--------------------------|--------------------------|--------------------------|
| <b>3.3.1. Verbindung von vorhandenem und erworbenem Wissen (z. B. Verknüpfung von vorhandenem Wissen über lebende Organismen mit bestimmten Ökosystemen)</b>                                                    | <input type="checkbox"/> | <input type="checkbox"/> | <input type="checkbox"/> | <input type="checkbox"/> |
| <b>3.3.2. Vergleich wesentlicher Begriffe und Beziehungen (z. B. Vergleich charakteristischer Merkmale von Tieren)</b>                                                                                          | <input type="checkbox"/> | <input type="checkbox"/> | <input type="checkbox"/> | <input type="checkbox"/> |
| <b>3.3.3. Erkennen unterschiedlicher Interessen und Identitäten (z. B. Zeichnen verschiedener Flaggen oder Vergleich verschiedener Augen- und Haarfarben)</b>                                                   | <input type="checkbox"/> | <input type="checkbox"/> | <input type="checkbox"/> | <input type="checkbox"/> |
| <b>3.3.4. Verknüpfung von Themen und Verallgemeinerung von Konzepten (z. B. Lernen von Verkehrsschildern während eines Spaziergangs oder Erkundung verschiedener Hunderassen, Farben und Größen von Hunden)</b> | <input type="checkbox"/> | <input type="checkbox"/> | <input type="checkbox"/> | <input type="checkbox"/> |

### 4. Nutzung vielfältiger Handlungs- und Ausdrucksmöglichkeiten

Bitte schätzen Sie ein, wie oft Sie die folgenden Handlungs- und Ausdrucksmöglichkeiten in der Vorschulerziehung nutzen:

## 20. 4.1. Interaktion

*Atzīmējiet visus atbilstošos variantus.*

|                                                                                                                                                                                                          | Niemals                  | Manchmal                 | Häufig                   | Immer                    |
|----------------------------------------------------------------------------------------------------------------------------------------------------------------------------------------------------------|--------------------------|--------------------------|--------------------------|--------------------------|
| <b>4.1.1. Sicherstellung des Zugangs und der Vorhersehbarkeit in verschiedenen Umgebungen (z. B. Verwendung von taktilen, auditiven, symbolischen und farbigen Hinweisen in der Umgebung des Kindes)</b> | <input type="checkbox"/> | <input type="checkbox"/> | <input type="checkbox"/> | <input type="checkbox"/> |
| <b>4.1.2. Zugang zu Materialien und Hilfsmitteln (z. B. Verwendung von Kopfhörern mit Geräuschunterdrückung, Gartenhandschuhen und alternativen Kommunikationsmitteln)</b>                               | <input type="checkbox"/> | <input type="checkbox"/> | <input type="checkbox"/> | <input type="checkbox"/> |

## 21. 4.2. Ausdruck und Kommunikation

*Atzīmējiet visus atbilstošos variantus.*

|                                                                                                                                                       | Niemals                  | Manchmal                 | Häufig                   | Immer                    |
|-------------------------------------------------------------------------------------------------------------------------------------------------------|--------------------------|--------------------------|--------------------------|--------------------------|
| <b>4.2.1. Einsatz verschiedener Kommunikationsmittel (z. B. Kinder können ihre Ideen durch Kunst, Musik oder Bewegung ausdrücken)</b>                 | <input type="checkbox"/> | <input type="checkbox"/> | <input type="checkbox"/> | <input type="checkbox"/> |
| <b>4.2.2. Bereitstellung verschiedener Materialien (z. B. Verwendung verschiedener Materialien bei der Aufgabenerfüllung)</b>                         | <input type="checkbox"/> | <input type="checkbox"/> | <input type="checkbox"/> | <input type="checkbox"/> |
| <b>4.2.3. Unterstützung anbieten und schrittweise reduzieren (z. B. verbale und visuelle physische Unterstützung, die schrittweise abgebaut wird)</b> | <input type="checkbox"/> | <input type="checkbox"/> | <input type="checkbox"/> | <input type="checkbox"/> |
| <b>4.2.4. Verwendung verschiedener Sprach- und Ausdrucksmittel (z. B. verschiedene Sprachen oder alternative Kommunikationsmethoden)</b>              | <input type="checkbox"/> | <input type="checkbox"/> | <input type="checkbox"/> | <input type="checkbox"/> |

## 22. 4.3. Entwicklung einer Strategie

*Atzīmējiet visus atbilstošos variantus.*

|                                                                                                                                                                                               | Niemals                  | Manchmal                 | Häufig                   | Immer                    |
|-----------------------------------------------------------------------------------------------------------------------------------------------------------------------------------------------|--------------------------|--------------------------|--------------------------|--------------------------|
| <b>4.3.1. Setzen Sie gemeinsam mit den Kindern sinnvolle Ziele (z. B. das Ziel, innerhalb einer Woche durch verschiedene Aktivitäten drei neue Wörter zu lernen)</b>                          | <input type="checkbox"/> | <input type="checkbox"/> | <input type="checkbox"/> | <input type="checkbox"/> |
| <b>4.3.2. Antizipation von Herausforderungen bei Aktivitäten (z. B. Planung eines Bibliotheksbesuchs und Antizipation möglicher Schwierigkeiten auf dem Weg oder in der Bibliothek)</b>       | <input type="checkbox"/> | <input type="checkbox"/> | <input type="checkbox"/> | <input type="checkbox"/> |
| <b>4.3.3. Organisation von Ressourcen und Informationen (z. B. Kennzeichnung von Materialien und Möbeln)</b>                                                                                  | <input type="checkbox"/> | <input type="checkbox"/> | <input type="checkbox"/> | <input type="checkbox"/> |
| <b>4.3.4. Selbsteinschätzung des Fortschritts oder Selbstreflexion der erworbenen Fähigkeiten (z. B. Verwendung von Diagrammen oder Tabellen für gelernte Konzepte, Buchstaben und Ideen)</b> | <input type="checkbox"/> | <input type="checkbox"/> | <input type="checkbox"/> | <input type="checkbox"/> |
| <b>4.3.5. Förderung integrativer Praktiken (z. B. Erkundung verschiedener kultureller Feiertage oder Traditionen)</b>                                                                         | <input type="checkbox"/> | <input type="checkbox"/> | <input type="checkbox"/> | <input type="checkbox"/> |

## 5. Möglichkeiten zur Anwendung von Lehrmethoden und -strategien, die von den UDL-Prinzipien umfasst sind

23. **5.1. Vor welchen Herausforderungen stehen Sie, wenn Sie versuchen, verschiedene Strategien und Methoden des Engagements, der Darstellung oder der Aktion und des Ausdrucks einzubeziehen**

*Atzīmējiet visus atbilstošos variantus.*

- Mangel an Ressourcen
- Begrenzte Kenntnisse oder Ausbildungsmöglichkeiten
- Zeitliche Zwänge
- Widerstände von Kollegen oder der Bildungseinrichtung
- Citas: \_\_\_\_\_

24. **5.2. Welche spezifischen Möglichkeiten der beruflichen Kompetenzentwicklung oder Unterstützung haben Sie in Bezug auf den Erwerb von Methoden und Strategien erhalten, die in den UDL-Prinzipien zur Förderung inklusiver Bildungspraktiken genannt werden**

*Atzīmējiet visus atbilstošos variantus.*

- Im Rahmen von Studiengängen erworbene Kenntnisse
- Formale Ausbildung (Kurse, Diplome) zur Verbesserung der beruflichen Kompetenz
- Selbstgesteuertes Lernen mit Hilfe von Ressourcen wie Büchern, Online-Kursen oder Recherche
- Kenntnisse, die durch die Zusammenarbeit mit Kollegen, Hilfskräften oder Fachleuten aus anderen Bereichen erworben wurden
- Keine einschlägigen Kenntnisse
- Citas: \_\_\_\_\_

## **Bewertung der UDL-Prinzipien für Studierende**

### **2. Einsatz verschiedener Engagement-Methoden**

Bitte schätzen Sie ein, wie oft die folgenden Methoden in der Vorschulerziehung eingesetzt werden sollte

## 25. 2.1. Wohlwollende Interessen und Identitäten:

*Atzīmējiet visus atbilstošos variantus.*

|                                                                                                                                                                                                                                                                                                            | Niemals                  | Manchmal                 | Häufig                   | Immer                    |
|------------------------------------------------------------------------------------------------------------------------------------------------------------------------------------------------------------------------------------------------------------------------------------------------------------|--------------------------|--------------------------|--------------------------|--------------------------|
| <b>2.1.1. Auswahl von Lernzielen und Aufgaben auf der Grundlage der individuellen Interessen, des kulturellen Kontexts, des Geschlechts, der Altersgruppe und der Fähigkeiten der Kinder (z. B. Auswahl der Darstellung von Ergebnissen in Form von Zeichnungen, Skulpturen, Videos oder Audiodateien)</b> | <input type="checkbox"/> | <input type="checkbox"/> | <input type="checkbox"/> | <input type="checkbox"/> |
| <b>2.1.2. Aktivitäten auf der Grundlage von Spielen und praktischen Erfahrungen (z. B. Rollenspiele und Exkursionen in verschiedenen Umgebungen - drinnen und draußen)</b>                                                                                                                                 | <input type="checkbox"/> | <input type="checkbox"/> | <input type="checkbox"/> | <input type="checkbox"/> |
| <b>2.1.3. Förderung der Freude an den Aktivitäten und Aufgaben (z. B. durch Überraschungen oder Entdeckungen während der Aktivitäten)</b>                                                                                                                                                                  | <input type="checkbox"/> | <input type="checkbox"/> | <input type="checkbox"/> | <input type="checkbox"/> |
| <b>2.1.4. Schaffung einer Umgebung, die den verschiedenen emotionalen und sensorischen Bedürfnissen des Kindes Rechnung trägt (z. B. Erkundung verschiedener Ideen und Fragen, Bereitstellung von Kopfhörern mit Geräuscherdrückung oder angepasster Beleuchtung)</b>                                      | <input type="checkbox"/> | <input type="checkbox"/> | <input type="checkbox"/> | <input type="checkbox"/> |

**26. 2.2. Nachhaltige Anstrengung und Ausdauer***Atzīmējiet visus atbilstošos variantus.*

|                                                                                                                                                                              | Niemals                  | Manchmal                 | Häufig                   | Immer                    |
|------------------------------------------------------------------------------------------------------------------------------------------------------------------------------|--------------------------|--------------------------|--------------------------|--------------------------|
| <b>2.2.1. Erklären des Zwecks der Aktivitäten (z. B. den Kindern erklären, warum sie durch Brettspiele und Rollenspiele das Teilen lernen)</b>                               | <input type="checkbox"/> | <input type="checkbox"/> | <input type="checkbox"/> | <input type="checkbox"/> |
| <b>2.2.2. Verschiedene Schwierigkeitsgrade (z. B. Aufgaben mit unterschiedlichem Schwierigkeitsgrad und unterschiedlicher Komplexität für verschiedene Fähigkeitsstufen)</b> | <input type="checkbox"/> | <input type="checkbox"/> | <input type="checkbox"/> | <input type="checkbox"/> |
| <b>2.2.3. Förderung der Teamarbeit (z. B. Ermutigung der Kinder, gemeinsam an Projekten oder Aufgaben zu arbeiten)</b>                                                       | <input type="checkbox"/> | <input type="checkbox"/> | <input type="checkbox"/> | <input type="checkbox"/> |
| <b>2.2.4. Förderung des Zugehörigkeitsgefühls (z. B. durch den Austausch von Erfahrungen, die mit den zu lernenden Konzepten zusammenhängen)</b>                             | <input type="checkbox"/> | <input type="checkbox"/> | <input type="checkbox"/> | <input type="checkbox"/> |
| <b>2.2.5. Konkretes, praktisches Rückmeldung geben (z. B. einem Kind sagen: "Mir gefällt, wie du dein Spielzeug mit deinem Freund geteilt hast!")</b>                        | <input type="checkbox"/> | <input type="checkbox"/> | <input type="checkbox"/> | <input type="checkbox"/> |

## 27. 2.3. Emotionale Kapazität

*Atzīmējiet visus atbilstošos variantus.*

|                                                                                                                                                                                                                                                               | Niemals                  | Manchmal                 | Häufig                   | Immer                    |
|---------------------------------------------------------------------------------------------------------------------------------------------------------------------------------------------------------------------------------------------------------------|--------------------------|--------------------------|--------------------------|--------------------------|
| <b>2.3.1. Das Bewusstsein für die Erwartungen der Kinder und die Förderung der Motivation für Aktivitäten (z. B. die Frage, was sie lesen können, wenn sie Lesen und Schreiben lernen, oder was die Belohnung für die Erledigung einer Aufgabe sein wird)</b> | <input type="checkbox"/> | <input type="checkbox"/> | <input type="checkbox"/> | <input type="checkbox"/> |
| <b>2.3.2. Entwicklung der Fähigkeit, Emotionen auszudrücken und sich selbst zu regulieren (z. B. Emotionen mit Emojis ausdrücken oder Verhaltensweisen durch Rollenspiele erlernen)</b>                                                                       | <input type="checkbox"/> | <input type="checkbox"/> | <input type="checkbox"/> | <input type="checkbox"/> |
| <b>2.3.3. Bewertung der eigenen Leistung und des eigenen Fortschritts (z. B. Erstellung von Tabellen, um die Anzahl der gelernten Buchstaben oder Symbole über einen bestimmten Zeitraum zu verfolgen)</b>                                                    | <input type="checkbox"/> | <input type="checkbox"/> | <input type="checkbox"/> | <input type="checkbox"/> |
| <b>2.3.4. Modellierung von Empathie durch Diskussionen und Rollenspiele (z. B. durch Diskussionen oder Rollenspiele zur Förderung des empathischen Verständnisses)</b>                                                                                        | <input type="checkbox"/> | <input type="checkbox"/> | <input type="checkbox"/> | <input type="checkbox"/> |

## 3. Verwendung verschiedener Darstellungsmittel

Bitte beurteilen Sie, wie oft die folgenden Darstellungsmittel in der Vorschulerziehung eingesetzt werden sollten:

## 28. 3.1. Wahrnehmung

*Atzīmējiet visus atbilstošos variantus.*

|                                                                                                                                             | Niemals                  | Manchmal                 | Häufig                   | Immer                    |
|---------------------------------------------------------------------------------------------------------------------------------------------|--------------------------|--------------------------|--------------------------|--------------------------|
| <b>3.1.1. Anpassung der Informationsdarstellung (z. B. digitale Hilfsmittel mit Anpassung von Schriftgröße und Farbkontrast)</b>            | <input type="checkbox"/> | <input type="checkbox"/> | <input type="checkbox"/> | <input type="checkbox"/> |
| <b>3.1.2. Bereitstellung von Informationen in verschiedenen Formaten (z. B. mit Videos, Audiomaterialien und Bewegungsaktivitäten)</b>      | <input type="checkbox"/> | <input type="checkbox"/> | <input type="checkbox"/> | <input type="checkbox"/> |
| <b>3.1.3. Authentische Darstellung des Themas (z. B. Erzählungen über verschiedene Sprachen und Kulturen in einem historischen Kontext)</b> | <input type="checkbox"/> | <input type="checkbox"/> | <input type="checkbox"/> | <input type="checkbox"/> |

## 29. 3.2. Sprache und Symbole

*Atzīmējiet visus atbilstošos variantus.*

|                                                                                                                                                                                                | Niemals                  | Manchmal                 | Häufig                   | Immer                    |
|------------------------------------------------------------------------------------------------------------------------------------------------------------------------------------------------|--------------------------|--------------------------|--------------------------|--------------------------|
| <b>3.2.1. Förderung des Verständnisses von Wörtern, Symbolen und Zahlen in verschiedenen Formaten (z. B. Erstellen von Diagrammen und Tabellen)</b>                                            | <input type="checkbox"/> | <input type="checkbox"/> | <input type="checkbox"/> | <input type="checkbox"/> |
| <b>3.2.2. Förderung des Verständnisses von Symbolen und Zahlen durch praktische Aktivitäten</b>                                                                                                | <input type="checkbox"/> | <input type="checkbox"/> | <input type="checkbox"/> | <input type="checkbox"/> |
| <b>3.2.3. Reflexion von Konzepten durch verschiedene Kulturen, Sprachen und Dialekte (z. B. Erklärung von Konzepten in verschiedenen Sprachen und Symbolen)</b>                                | <input type="checkbox"/> | <input type="checkbox"/> | <input type="checkbox"/> | <input type="checkbox"/> |
| <b>3.2.4. Beseitigung von Stereotypen über verschiedene Sprachen und Kommunikationsmittel (z. B. Erlernen von Symbolen und Ausdrucksmitteln, Wörtern und Sätzen in verschiedenen Sprachen)</b> | <input type="checkbox"/> | <input type="checkbox"/> | <input type="checkbox"/> | <input type="checkbox"/> |
| <b>3.2.5. Darstellung des Themas mit Hilfe verschiedener Darstellungsmittel (z. B. Videos, Diagramme und interaktive Aktivitäten)</b>                                                          | <input type="checkbox"/> | <input type="checkbox"/> | <input type="checkbox"/> | <input type="checkbox"/> |

### 30. 3.3. Wissen aufbauen

*Atzīmējiet visus atbilstošos variantus.*

|                                                                                                                                                                                                                 | Niemals                  | Manchmal                 | Häufig                   | Immer                    |
|-----------------------------------------------------------------------------------------------------------------------------------------------------------------------------------------------------------------|--------------------------|--------------------------|--------------------------|--------------------------|
| <b>3.3.1. Verbindung von vorhandenem und erworbenem Wissen (z. B. Verknüpfung von vorhandenem Wissen über lebende Organismen mit bestimmten Ökosystemen)</b>                                                    | <input type="checkbox"/> | <input type="checkbox"/> | <input type="checkbox"/> | <input type="checkbox"/> |
| <b>3.3.2. Vergleich wesentlicher Begriffe und Beziehungen (z. B. Vergleich charakteristischer Merkmale von Tieren)</b>                                                                                          | <input type="checkbox"/> | <input type="checkbox"/> | <input type="checkbox"/> | <input type="checkbox"/> |
| <b>3.3.3. Erkennen unterschiedlicher Interessen und Identitäten (z. B. Zeichnen verschiedener Flaggen oder Vergleich verschiedener Augen- und Haarfarben)</b>                                                   | <input type="checkbox"/> | <input type="checkbox"/> | <input type="checkbox"/> | <input type="checkbox"/> |
| <b>3.3.4. Verknüpfung von Themen und Verallgemeinerung von Konzepten (z. B. Lernen von Verkehrsschildern während eines Spaziergangs oder Erkundung verschiedener Hunderassen, Farben und Größen von Hunden)</b> | <input type="checkbox"/> | <input type="checkbox"/> | <input type="checkbox"/> | <input type="checkbox"/> |

### 4. Nutzung vielfältiger Handlungs- und Ausdrucksmöglichkeiten

Bitte schätzen Sie ein, wie oft die folgenden Handlungs- und Ausdrucksmöglichkeiten in der Vorschulerziehung eingesetzt werden sollten:

## 31. 4.1. Interaktion

*Atzīmējiet visus atbilstošos variantus.*

|                                                                                                                                                                                                          | Niemals                  | Manchmal                 | Häufig                   | Immer                    |
|----------------------------------------------------------------------------------------------------------------------------------------------------------------------------------------------------------|--------------------------|--------------------------|--------------------------|--------------------------|
| <b>4.1.1. Sicherstellung des Zugangs und der Vorhersehbarkeit in verschiedenen Umgebungen (z. B. Verwendung von taktilen, auditiven, symbolischen und farbigen Hinweisen in der Umgebung des Kindes)</b> | <input type="checkbox"/> | <input type="checkbox"/> | <input type="checkbox"/> | <input type="checkbox"/> |
| <b>4.1.2. Zugang zu Materialien und Hilfsmitteln (z. B. Verwendung von Kopfhörern mit Geräuschunterdrückung, Gartenhandschuhen und alternativen Kommunikationsmitteln)</b>                               | <input type="checkbox"/> | <input type="checkbox"/> | <input type="checkbox"/> | <input type="checkbox"/> |

## 32. 4.2. Ausdruck und Kommunikation

*Atzīmējiet visus atbilstošos variantus.*

|                                                                                                                                                       | Niemals                  | Manchmal                 | Häufig                   | Immer                    |
|-------------------------------------------------------------------------------------------------------------------------------------------------------|--------------------------|--------------------------|--------------------------|--------------------------|
| <b>4.2.1. Einsatz verschiedener Kommunikationsmittel (z. B. Kinder können ihre Ideen durch Kunst, Musik oder Bewegung ausdrücken)</b>                 | <input type="checkbox"/> | <input type="checkbox"/> | <input type="checkbox"/> | <input type="checkbox"/> |
| <b>4.2.2. Bereitstellung verschiedener Materialien (z. B. Verwendung verschiedener Materialien bei der Aufgabenerfüllung)</b>                         | <input type="checkbox"/> | <input type="checkbox"/> | <input type="checkbox"/> | <input type="checkbox"/> |
| <b>4.2.3. Unterstützung anbieten und schrittweise reduzieren (z. B. verbale und visuelle physische Unterstützung, die schrittweise abgebaut wird)</b> | <input type="checkbox"/> | <input type="checkbox"/> | <input type="checkbox"/> | <input type="checkbox"/> |
| <b>4.2.4. Verwendung verschiedener Sprach- und Ausdrucksmittel (z. B. verschiedene Sprachen oder alternative Kommunikationsmethoden)</b>              | <input type="checkbox"/> | <input type="checkbox"/> | <input type="checkbox"/> | <input type="checkbox"/> |

## 33. 4.3. Entwicklung einer Strategie

*Atzīmējiet visus atbilstošos variantus.*

|                                                                                                                                                                                              | Niemals                  | Manchmal                 | Häufig                   | Immer                    |
|----------------------------------------------------------------------------------------------------------------------------------------------------------------------------------------------|--------------------------|--------------------------|--------------------------|--------------------------|
| <b>4.3.1. Setzen Sie gemeinsam mit den Kindern sinnvolle Ziele (z. B. drei neue Wörter innerhalb einer Woche durch verschiedene Aktivitäten zu lernen)</b>                                   | <input type="checkbox"/> | <input type="checkbox"/> | <input type="checkbox"/> | <input type="checkbox"/> |
| <b>4.3.2. Antizipation von Herausforderungen bei Aktivitäten (z. B. Planung eines Bibliotheksbesuchs und Antizipation möglicher Schwierigkeiten auf dem Weg oder in der Bibliothek)</b>      | <input type="checkbox"/> | <input type="checkbox"/> | <input type="checkbox"/> | <input type="checkbox"/> |
| <b>4.3.3. Organisation von Ressourcen und Informationen (z. B. Kennzeichnung von Materialien und Möbeln)</b>                                                                                 | <input type="checkbox"/> | <input type="checkbox"/> | <input type="checkbox"/> | <input type="checkbox"/> |
| <b>4.3.4. Selbstbeurteilung der Fortschritte oder Selbstreflexion der erworbenen Fähigkeiten (z. B. Verwendung von Diagrammen oder Tabellen für gelernte Konzepte, Buchstaben und Ideen)</b> | <input type="checkbox"/> | <input type="checkbox"/> | <input type="checkbox"/> | <input type="checkbox"/> |
| <b>4.3.5. Förderung integrativer Praktiken (z. B. Erkundung verschiedener kultureller Feiertage oder Traditionen)</b>                                                                        | <input type="checkbox"/> | <input type="checkbox"/> | <input type="checkbox"/> | <input type="checkbox"/> |

## 5. Möglichkeiten zur Anwendung von Lehrmethoden und -strategien, die von den UDL-Prinzipien umfasst sind

34. **5.1. Welche Herausforderungen könnten sich Ihrer Meinung nach bei dem Versuch ergeben, verschiedene Strategien und Methoden für Engagement, Darstellung oder Aktion und Ausdruck in die Vorschulerziehung einzubeziehen**

*Atzīmējjiet tikai vienu variantu.*

- Mangel an Ressourcen
- Begrenzte Kenntnisse oder Ausbildungsmöglichkeiten
- Zeitliche Zwänge
- Widerstände von Kollegen oder der Bildungseinrichtung

35. **5.2. Welche Möglichkeiten der professionellen Kompetenzentwicklung oder Unterstützung wären in Bezug auf die Aneignung von Methoden und Strategien, die den UDL-Prinzipien zur Förderung inklusiver Bildungspraktiken beschrieben sind, erforderlich?**

*Atzīmējjiet tikai vienu variantu.*

- Im Rahmen von Studiengängen erworbene Kenntnisse
- Formale Ausbildung (Kurse, Diplome) zur Verbesserung der beruflichen Kompetenz
- Selbstgesteuertes Lernen mit Hilfe von Ressourcen wie Büchern, Online-Kursen oder Recherchen
- Kenntnisse, die durch die Zusammenarbeit mit Kollegen, Hilfskräften oder Fachleuten aus anderen Bereichen erworben wurden
- Es sind keine zusätzlichen Kenntnisse erforderlich

---

Uzņēmums Google nav šī satura autors un to neatbalsta.

Google Veidlapas
