# Supplementary material
Source: Research Square preprint supplement (doi:10.21203/rs.3.rs-9452587/v1)
Supplement: Supplementary file 4 [file 35c66a134c5df06e47c8b470.xlsx]

## Sheet: Sheet1
Laika zīmogs	1.1. Valsts	1.1.1 Bundesland	1.2. Geschlecht	1.3. Was ist Ihr höchster akademischer Abschluss?	1.4. Berufserfahrung (in Jahren):	1.5. Arbeitsort:	1.6. Wie beurteilen Sie die vorschulische Bildungseinrichtung, in der Sie arbeiten, im Hinblick auf die Umsetzung integrativer Bildungspraktiken?	1.7. Altersgruppe der Kinder, mit denen Sie täglich arbeiten:	1.8. Wie viele Kinder sind derzeit in Ihrer Gruppe eingeschrieben?	1.9. Wie viele Lehrer*innen/Pädagog*innen, Lehrerhelfer*innen/Betreuer*innen oder Assistenten arbeiten täglich in Ihrer Gruppe?	1.10. Wie viele Kinder in Ihrer Gruppe sind in einem Sonderschulprogramm eingeschrieben bzw. haben einen "Inklusions-Bescheid" oder eine zusätzliche Förderung?	1.11. Bitte bewerten Sie die Bedeutung der folgenden auf den UDL-Prinzipien basierenden Aspekte für die Förderung eines inklusiven Lernumfelds: [Kinder durch verschiedene Methoden in Aktivitäten einbinden]	1.11. Bitte bewerten Sie die Bedeutung der folgenden auf den UDL-Prinzipien basierenden Aspekte für die Förderung eines inklusiven Lernumfelds: [Präsentation von Informationen mit Hilfe verschiedener Materialien]	1.11. Bitte bewerten Sie die Bedeutung der folgenden auf den UDL-Prinzipien basierenden Aspekte für die Förderung eines inklusiven Lernumfelds: [Ausdruck und Bewertung der erworbenen Kenntnisse mit verschiedenen Mitteln]	1.12. Bitte geben Sie Ihre derzeitige Qualifikation an, um die Fragen im folgenden Abschnitt zu beantworten und die von den UDL-Prinzipien umfassten Lehrmethoden und -strategien zu bewerten:	2.1. Wohlwollende Interessen und Identitäten: [2.1.1. Auswahl von Lernzielen und Aufgaben auf der Grundlage der individuellen Interessen, des kulturellen Kontexts, des Geschlechts, der Altersgruppe und der Fähigkeiten der Kinder (z. B. Wahlmöglichkeiten für die Darstellung der Ergebnisse in Form von Zeichnungen, Skulpturen, Videos oder Audiodateien)]	2.1. Wohlwollende Interessen und Identitäten: [2.1.2. Aktivitäten, die auf Spielen und praktischen Erfahrungen basieren (z. B. Rollenspiele und Exkursionen in verschiedenen Umgebungen - drinnen und draußen)]	2.1. Wohlwollende Interessen und Identitäten: [2.1.3. Förderung der Freude an den Aktivitäten und Aufgaben (z. B. durch Überraschungen oder Entdeckungen während der Aktivitäten)]	2.1. Wohlwollende Interessen und Identitäten: [2.1.4. Schaffung einer Umgebung, die den verschiedenen emotionalen und sensorischen Bedürfnissen des Kindes Rechnung trägt (z. B. Erkundung verschiedener Ideen und Fragen, Bereitstellung von Kopfhörern mit Geräuschunterdrückung oder angepasster Beleuchtung)]	2.2. Nachhaltige Anstrengung und Ausdauer [2.2.1. Erklären des Zwecks der Aktivitäten (z. B. den Kindern erklären, warum sie durch Brettspiele und Rollenspiele das Teilen lernen)]	2.2. Nachhaltige Anstrengung und Ausdauer [2.2.2. Verschiedene Schwierigkeitsgrade (z. B. Aufgaben mit unterschiedlichem Schwierigkeitsgrad und unterschiedlicher Komplexität für verschiedene Fähigkeitsstufen)]	2.2. Nachhaltige Anstrengung und Ausdauer [2.2.3. Förderung der Teamarbeit (z. B. Ermutigung der Kinder, gemeinsam an Projekten oder Aufgaben zu arbeiten)]	2.2. Nachhaltige Anstrengung und Ausdauer [2.2.4. Förderung des Zugehörigkeitsgefühls (z. B. durch den Austausch von Erfahrungen, die mit den zu lernenden Konzepten zusammenhängen)]	2.2. Nachhaltige Anstrengung und Ausdauer [2.2.5. Konkretes, praktisches Rückmeldung geben (z. B. einem Kind sagen: "Mir gefällt, wie du dein Spielzeug mit deinem Freund geteilt hast!)]	2.3. Emotionale Kapazität [2.3.1. Das Bewusstsein für die Erwartungen der Kinder und die Förderung der Motivation für Aktivitäten (z. B. die Frage, was sie lesen können, wenn sie Lesen und Schreiben lernen, oder was die Belohnung für die Erfüllung einer Aufgabe sein wird)]	2.3. Emotionale Kapazität [2.3.2. Entwicklung der Fähigkeit, Emotionen auszudrücken und sich selbst zu regulieren (z. B. Emotionen mit Emojis ausdrücken oder Verhaltensweisen durch Rollenspiele erlernen)]	2.3. Emotionale Kapazität [2.3.3. Bewertung der eigenen Leistung und des eigenen Fortschritts (z. B. Erstellung von Tabellen, um die Anzahl der gelernten Buchstaben oder Symbole über einen bestimmten Zeitraum zu verfolgen)]	2.3. Emotionale Kapazität [2.3.4. Einfühlungsvermögen durch Diskussionen und Rollenspiele vorleben (z. B. durch Diskussionen oder Rollenspiele, um ein einfühlsames Verständnis zu fördern)]	3.1. Wahrnehmung [3.1.1. Anpassung der Informationsdarstellung (z. B. digitale Hilfsmittel mit Anpassung von Schriftgröße und Farbkontrast)]	3.1. Wahrnehmung [3.1.2. Bereitstellung von Informationen in verschiedenen Formaten (z. B. mit Videos, Audiomaterialien und Bewegungsaktivitäten)]	3.1. Wahrnehmung [3.1.3. Authentische Darstellung des Themas (z. B. Erzählungen über verschiedene Sprachen und Kulturen in einem historischen Kontext)]	3.2. Sprache und Symbole [3.2.1. Förderung des Verständnisses von Wörtern, Symbolen und Zahlen in verschiedenen Formaten (z. B. Erstellen von Diagrammen und Tabellen)]	3.2. Sprache und Symbole [3.2.2. Förderung des Verständnisses von Symbolen und Zahlen durch praktische Aktivitäten]	3.2. Sprache und Symbole [3.2.3. Reflexion von Konzepten durch verschiedene Kulturen, Sprachen und Dialekte (z. B. Erklärung von Konzepten in verschiedenen Sprachen und Symbolen)]	3.2. Sprache und Symbole [3.2.4. Beseitigung von Stereotypen über verschiedene Sprachen und Kommunikationsmittel (z. B. Erlernen von Symbolen und Ausdrucksmitteln, Wörtern und Sätzen in verschiedenen Sprachen)]	3.2. Sprache und Symbole [3.2.5. Darstellung des Themas mit verschiedenen Darstellungsmitteln (z. B. durch Videos, Grafiken und interaktive Aktivitäten)]	3.3. Wissen aufbauen [3.3.1. Verbindung von vorhandenem und erworbenem Wissen (z. B. Verknüpfung von vorhandenem Wissen über lebende Organismen mit bestimmten Ökosystemen)]	3.3. Wissen aufbauen [3.3.2. Vergleich wesentlicher Begriffe und Beziehungen (z. B. Vergleich charakteristischer Merkmale von Tieren)]	3.3. Wissen aufbauen [3.3.3. Erkennen unterschiedlicher Interessen und Identitäten (z. B. Zeichnen verschiedener Flaggen oder Vergleich verschiedener Augen- und Haarfarben)]	3.3. Wissen aufbauen [3.3.4. Verknüpfung von Themen und Verallgemeinerung von Konzepten (z. B. Lernen von Verkehrsschildern während eines Spaziergangs oder Erkundung verschiedener Hunderassen, Farben und Größen von Hunden)]	4.1. Interaktion [4.1.1. Sicherstellung des Zugangs und der Vorhersehbarkeit in verschiedenen Umgebungen (z. B. Verwendung von taktilen, auditiven, symbolischen und farbigen Hinweisen in der Umgebung des Kindes)]	4.1. Interaktion [4.1.2. Zugang zu Materialien und Hilfsmitteln (z. B. Verwendung von Kopfhörern mit Geräuschunterdrückung, Gartenhandschuhen und alternativen Kommunikationsmitteln)]	4.2. Ausdruck und Kommunikation [4.2.1. Einsatz verschiedener Kommunikationsmittel (z. B. Kinder können ihre Ideen durch Kunst, Musik oder Bewegung ausdrücken)]	4.2. Ausdruck und Kommunikation [4.2.2. Bereitstellung verschiedener Materialien (z. B. Verwendung verschiedener Materialien bei der Aufgabenerfüllung)]	4.2. Ausdruck und Kommunikation [4.2.3. Unterstützung anbieten und schrittweise reduzieren (z. B. verbale und visuelle physische Unterstützung, die schrittweise abgebaut wird)]	4.2. Ausdruck und Kommunikation [4.2.4. Verwendung verschiedener Sprach- und Ausdrucksmittel (z. B. verschiedene Sprachen oder alternative Kommunikationsmethoden)]	4.3. Entwicklung einer Strategie [4.3.1. Setzen Sie gemeinsam mit den Kindern sinnvolle Ziele (z. B. das Ziel, innerhalb einer Woche durch verschiedene Aktivitäten drei neue Wörter zu lernen)]	4.3. Entwicklung einer Strategie [4.3.2. Antizipation von Herausforderungen bei Aktivitäten (z. B. Planung eines Bibliotheksbesuchs und Antizipation möglicher Schwierigkeiten auf dem Weg oder in der Bibliothek)]	4.3. Entwicklung einer Strategie [4.3.3. Organisation von Ressourcen und Informationen (z. B. Kennzeichnung von Materialien und Möbeln)]
2025.12.5 11:04:26	Österreich		Weiblich	Master-Abschluss	Mehr als 10 Jahre	In einem Ballungsgebiet	Inklusion (die Einrichtung führt spezielle Bildungsprogramme durch)	3 - 6 Jahre	21 - 25 Kinder	2 - 4	3 - 5 Kinder	Sehr wichtig	Sehr wichtig	Sehr wichtig	Lehrer*in/Pädagog*in	Immer	Immer	Immer	Immer	Immer	Immer	Immer	Immer	Immer	Immer	Immer	Immer	Immer	Immer	Immer	Immer	Häufig, Immer	Häufig	Häufig	Immer	Häufig	Immer	Immer	Häufig	Immer	Immer	Immer	Immer	Immer	Immer	Immer	Immer	Immer	Immer
2025.12.5 12:16:27	Österreich	STMK	Weiblich	Derzeitige Qualifizierung	Mehr als 10 Jahre	In einem ländlichen Gebiet	Inklusion (die Einrichtung führt spezielle Bildungsprogramme durch)	3 - 6 Jahre	21 - 25 Kinder	2 - 4	1 - 2 Kinder	Sehr wichtig	Sehr wichtig	Sehr wichtig	Lehrer*in/Pädagog*in	Häufig	Immer	Immer	Immer	Immer	Immer	Immer	Immer	Manchmal	Immer	Immer	Immer	Immer	Immer	Manchmal	Immer	Immer	Immer	Immer	Immer	Immer	Manchmal	Manchmal	Manchmal	Manchmal	Immer	Immer	Immer	Immer	Immer	Immer	Immer	Immer	Immer
2025.13.5 14:18:30	Österreich	Steiermark	Weiblich	Bachelor-Abschluss	Weniger als ein Jahr	In einem Ballungsgebiet	Inklusion (die Einrichtung führt spezielle Bildungsprogramme durch)	6 - 8 Jahre	16 - 20 Kinder	1 - 2, 2 - 4	Nicht anwendbar	Sehr wichtig	Sehr wichtig	Ziemlich wichtig	Lehrer*in/Pädagog*in	Manchmal	Manchmal	Häufig	Niemals	Häufig	Manchmal	Häufig	Manchmal	Häufig	Manchmal	Manchmal	Manchmal	Manchmal	Manchmal	Manchmal	Manchmal	Manchmal	Manchmal	Manchmal	Häufig	Häufig	Häufig	Manchmal	Immer	Manchmal	Manchmal	Manchmal	Häufig	Häufig	Manchmal	Manchmal	Häufig	Manchmal	Manchmal
2025.13.5 14:52:55	Österreich	Steiermark	Weiblich	Derzeitige Qualifizierung	Mehr als 10 Jahre	In einem Ballungsgebiet	Inklusion (die Einrichtung führt spezielle Bildungsprogramme durch)	3 - 6 Jahre	1 - 5 Kinder	2 - 4	3 - 5 Kinder	Sehr wichtig	Sehr wichtig	Sehr wichtig	Inklusionspädagog*in	Häufig	Manchmal	Immer	Häufig	Manchmal	Häufig	Manchmal	Manchmal	Häufig	Niemals	Manchmal	Manchmal	Manchmal	Niemals	Niemals	Niemals	Immer	Häufig	Niemals	Häufig	Niemals	Manchmal	Manchmal	Niemals	Niemals	Manchmal	Manchmal	Häufig	Häufig	Häufig	Manchmal	Manchmal	Niemals	Manchmal
2025.13.5 21:47:12	Österreich	Steiermark	Weiblich	Berufliche Hochschulbildung (Stufe 1)	Mehr als 10 Jahre	In einem Ballungsgebiet	Inklusion (die Einrichtung führt spezielle Bildungsprogramme durch)	3 - 6 Jahre	16 - 20 Kinder	5 oder mehr	Mehr als 5 Kinder	Sehr wichtig	Sehr wichtig	Sehr wichtig	Lehrer*in/Pädagog*in	Häufig	Häufig	Häufig	Immer	Immer	Häufig	Immer	Häufig	Häufig	Immer	Häufig	Häufig	Häufig	Häufig	Häufig	Manchmal	Manchmal	Häufig	Häufig	Immer	Häufig	Häufig	Häufig	Immer	Immer	Häufig	Manchmal	Häufig	Immer	Immer	Immer	Immer	Häufig	Häufig
2025.14.5 14:23:46	Österreich	steiermark	Weiblich	Bachelor-Abschluss	Mehr als 10 Jahre	In einem Ballungsgebiet	Inklusion (die Einrichtung führt spezielle Bildungsprogramme durch)	3 - 6 Jahre	21 - 25 Kinder	2 - 4	Keine	Sehr wichtig	Sehr wichtig	Sehr wichtig	Lehrer*in/Pädagog*in	Immer	Immer	Immer	Immer	Immer	Häufig	Immer	Immer	Immer	Häufig	Immer	Manchmal	Häufig	Manchmal	Häufig	Manchmal	Niemals	Immer	Manchmal	Häufig	Manchmal	Immer	Immer	Immer	Immer	Häufig	Niemals	Häufig, Immer	Immer	Immer	Immer	Manchmal	Niemals	Immer
2025.14.5 19:43:08	Österreich	Kärnten	Weiblich	Master-Abschluss	Mehr als 10 Jahre	In einem Ballungsgebiet	Inklusion (die Einrichtung führt spezielle Bildungsprogramme durch)	3 - 6 Jahre	11 - 15 Kinder	1 - 2	Keine	Sehr wichtig	Ziemlich wichtig, Sehr wichtig	Ziemlich wichtig	Lehrer*in/Pädagog*in	Manchmal	Häufig	Häufig, Immer	Häufig	Manchmal	Häufig	Immer	Immer	Häufig	Immer	Immer	Manchmal	Immer	Manchmal	Häufig	Häufig	Häufig	Immer	Häufig	Immer	Manchmal	Immer	Immer	Immer	Immer	Häufig	Immer	Immer	Immer	Immer	Immer	Häufig	Häufig	Häufig
2025.14.5 22:25:31	Österreich	Kärnten	Männlich	Master-Abschluss	Keine Erfahrung	In einem Ballungsgebiet, Nicht anwendbar	Nicht inklusiv (die Einrichtung führt keine speziellen Bildungsprogramme durch)	3 - 6 Jahre	21 - 25 Kinder	1 - 2	Keine	Eher unwichtig	Nicht wichtig	Neutral, keine Meinung	Student*in
2025.15.5 08:12:58	Österreich	OÖ	Weiblich	Master-Abschluss	6 - 10 Jahre	In einer Kleinstadt	Inklusion (die Einrichtung führt spezielle Bildungsprogramme durch)	3 - 6 Jahre	21 - 25 Kinder	1 - 2	1 - 2 Kinder	Sehr wichtig	Sehr wichtig	Eher unwichtig	Lehrer*in/Pädagog*in	Manchmal	Immer	Häufig	Immer	Manchmal	Immer	Immer	Immer	Niemals	Immer	Immer	Manchmal	Immer	Manchmal	Niemals	Niemals	Manchmal	Manchmal	Niemals	Immer	Niemals	Häufig	Häufig	Niemals	Häufig	Immer	Immer	Immer	Immer	Immer	Manchmal	Manchmal	Manchmal	Immer
2025.15.5 09:20:39	Österreich	Steiermark	Weiblich	Bachelor-Abschluss	6 - 10 Jahre	In einem Ballungsgebiet	Nicht inklusiv (die Einrichtung führt keine speziellen Bildungsprogramme durch)	1 - 3 Jahre	11 - 15 Kinder	2 - 4	Keine	Sehr wichtig	Sehr wichtig	Ziemlich wichtig	Lehrer*in/Pädagog*in	Immer	Immer	Immer	Immer	Immer	Häufig	Häufig	Häufig, Immer	Immer	Häufig	Immer	Häufig	Immer	Häufig	Häufig	Immer	Immer	Immer	Häufig, Immer	Immer	Häufig	Immer	Häufig	Immer	Immer	Manchmal	Immer	Immer	Immer	Häufig	Immer	Manchmal	Immer	Immer
2025.15.5 14:26:01	Österreich	Steiermark	Weiblich	Berufliche Hochschulbildung (Stufe 1)	3 - 6 Jahre	In einem Ballungsgebiet	Inklusion (die Einrichtung führt spezielle Bildungsprogramme durch)	3 - 6 Jahre	21 - 25 Kinder	1 - 2, 2 - 4	Keine	Sehr wichtig	Neutral, keine Meinung	Ziemlich wichtig	Lehrer*in/Pädagog*in	Häufig, Immer	Immer	Häufig	Manchmal	Manchmal	Manchmal	Häufig	Immer	Häufig	Niemals	Häufig	Manchmal	Immer	Niemals	Häufig	Immer	Häufig	Häufig	Manchmal	Manchmal	Häufig	Häufig	Häufig	Häufig	Immer	Häufig	Immer	Manchmal	Immer	Manchmal	Manchmal	Häufig	Häufig	Manchmal
2025.15.5 20:41:35	Österreich	Steiermark	Weiblich	Bachelor-Abschluss	Mehr als 10 Jahre	In einem ländlichen Gebiet	Inklusion (die Einrichtung führt spezielle Bildungsprogramme durch)	Gemischte Altersgruppen	16 - 20 Kinder	2 - 4	1 - 2 Kinder	Sehr wichtig	Sehr wichtig	Sehr wichtig	Lehrer*in/Pädagog*in	Häufig	Häufig	Häufig	Immer	Häufig	Immer	Immer	Häufig	Immer	Manchmal	Häufig	Manchmal	Häufig	Manchmal	Häufig	Häufig	Manchmal	Häufig	Manchmal	Manchmal	Manchmal	Häufig	Häufig	Immer	Immer	Immer	Häufig	Immer	Immer	Immer	Manchmal	Manchmal	Manchmal	Häufig
2025.16.5 10:06:56	Österreich	Steiermark	Weiblich	Berufliche Hochschulbildung (Stufe 1)	Mehr als 10 Jahre	In einem ländlichen Gebiet	Inklusion (die Einrichtung führt spezielle Bildungsprogramme durch)	3 - 6 Jahre	21 - 25 Kinder	2 - 4	1 - 2 Kinder	Sehr wichtig	Ziemlich wichtig	Ziemlich wichtig	Inklusionspädagog*in	Immer	Immer	Immer	Häufig	Häufig	Manchmal	Manchmal	Häufig	Immer	Häufig	Immer	Häufig	Manchmal	Manchmal	Manchmal	Niemals	Niemals	Manchmal	Niemals	Niemals	Niemals	Manchmal	Manchmal	Manchmal	Häufig	Häufig	Häufig	Häufig	Häufig	Häufig	Manchmal	Manchmal	Manchmal	Häufig
2025.16.5 11:39:03	Österreich		Weiblich	Berufliche Hochschulbildung (Stufe 2)	Keine Erfahrung	Nicht anwendbar	Nicht anwendbar	Nicht anwendbar	Nicht anwendbar	Nicht anwendbar	Nicht anwendbar	Sehr wichtig	Ziemlich wichtig	Ziemlich wichtig	Student*in
2025.16.5 11:54:15	Österreich	Steiermark	Weiblich	Berufliche Hochschulbildung (Stufe 1)	Mehr als 10 Jahre	In einem Ballungsgebiet	Inklusion (die Einrichtung führt spezielle Bildungsprogramme durch)	3 - 6 Jahre	21 - 25 Kinder	2 - 4	1 - 2 Kinder	Sehr wichtig	Sehr wichtig	Sehr wichtig	Lehrer*in/Pädagog*in	Immer	Immer	Immer	Immer	Häufig	Immer	Immer	Immer	Immer	Immer	Immer	Häufig	Häufig	Immer	Häufig	Immer	Häufig	Immer	Häufig	Häufig	Häufig	Immer	Immer	Immer	Immer	Immer	Immer	Immer	Immer	Immer	Immer	Häufig	Immer	Immer
2025.16.5 11:54:45	Österreich	Steiermark	Weiblich	Bachelor-Abschluss	Mehr als 10 Jahre	In einem Ballungsgebiet	Inklusion (die Einrichtung führt spezielle Bildungsprogramme durch)	Gemischte Altersgruppen	Nicht anwendbar	Nicht anwendbar	3 - 5 Kinder	Sehr wichtig	Neutral, keine Meinung	Ziemlich wichtig	Lehrer*in/Pädagog*in	Immer	Immer	Immer	Immer	Manchmal	Immer	Häufig	Immer	Häufig	Häufig	Häufig	Manchmal	Immer	Häufig	Manchmal	Immer	Niemals	Immer	Manchmal	Häufig	Manchmal	Häufig	Häufig		Häufig	Immer	Immer	Häufig	Immer	Immer	Manchmal	Manchmal	Immer	Immer
2025.16.5 12:03:56	Österreich	Steiermark	Weiblich	Derzeitige Qualifizierung	Mehr als 10 Jahre	In einem ländlichen Gebiet	Inklusion (die Einrichtung führt spezielle Bildungsprogramme durch)	3 - 6 Jahre	21 - 25 Kinder	2 - 4	1 - 2 Kinder	Sehr wichtig	Sehr wichtig	Ziemlich wichtig	Lehrer*in/Pädagog*in	Häufig	Häufig	Häufig	Immer	Immer	Immer	Häufig	Häufig	Immer	Manchmal	Immer	Niemals, Manchmal	Immer	Häufig	Häufig	Häufig	Häufig	Immer	Häufig	Häufig	Manchmal	Manchmal	Häufig	Häufig	Immer	Immer	Häufig	Immer	Häufig	Immer	Häufig	Immer	Manchmal	Immer
2025.16.5 12:10:29	Österreich	Steiermark	Weiblich	Berufliche Hochschulbildung (Stufe 1)	Mehr als 10 Jahre	In einem ländlichen Gebiet	Inklusion (die Einrichtung führt spezielle Bildungsprogramme durch)	1 - 3 Jahre, 3 - 6 Jahre	21 - 25 Kinder	1 - 2	Keine	Sehr wichtig	Ziemlich wichtig	Ziemlich wichtig	Lehrer*in/Pädagog*in	Häufig	Häufig	Häufig	Immer	Häufig	Häufig	Häufig	Häufig	Häufig	Häufig	Häufig	Häufig	Häufig	Häufig	Häufig	Häufig	Häufig	Häufig	Häufig	Häufig	Häufig	Häufig	Häufig	Häufig	Häufig	Häufig	Häufig	Häufig	Häufig	Häufig	Häufig	Häufig	Häufig	Häufig
2025.16.5 12:13:26	Österreich	Steiermark	Weiblich	Derzeitige Qualifizierung	1 - 2 Jahre	In einem Ballungsgebiet	Nicht anwendbar	6 - 8 Jahre	21 - 25 Kinder	1 - 2	1 - 2 Kinder	Ziemlich wichtig	Sehr wichtig	Sehr wichtig	Student*in
2025.16.5 12:13:39	Österreich	Steiermark	Weiblich	Berufliche Hochschulbildung (Stufe 1)	Keine Erfahrung	In einer Kleinstadt	Nicht inklusiv (die Einrichtung führt keine speziellen Bildungsprogramme durch)	6 - 8 Jahre	21 - 25 Kinder	1 - 2	Keine	Sehr wichtig	Neutral, keine Meinung	Ziemlich wichtig	Student*in
2025.16.5 12:13:41	Österreich	Steiermark	Weiblich	Berufliche Hochschulbildung (Stufe 1)	Keine Erfahrung	In einer Kleinstadt, Nicht anwendbar	Inklusion (die Einrichtung führt spezielle Bildungsprogramme durch)	6 - 8 Jahre	21 - 25 Kinder	1 - 2	Keine	Ziemlich wichtig	Ziemlich wichtig	Ziemlich wichtig	Student*in
2025.16.5 12:13:54	Österreich	Steiermark	Weiblich	Derzeitige Qualifizierung	1 - 2 Jahre	In einer Kleinstadt, In einem ländlichen Gebiet	Nicht inklusiv (die Einrichtung führt keine speziellen Bildungsprogramme durch)	0 - 12 Monate, 1 - 3 Jahre, 3 - 6 Jahre, 6 - 8 Jahre	21 - 25 Kinder	1 - 2	Keine	Sehr wichtig	Sehr wichtig	Ziemlich wichtig	Student*in
2025.16.5 12:14:27	Österreich	Steiermark	Weiblich	Derzeitige Qualifizierung	Weniger als ein Jahr	In einem Ballungsgebiet	Inklusion (die Einrichtung führt spezielle Bildungsprogramme durch)	6 - 8 Jahre	21 - 25 Kinder	1 - 2	Keine	Sehr wichtig	Sehr wichtig	Ziemlich wichtig	Student*in
2025.16.5 12:14:34	Österreich	Steiermark	Weiblich	Berufliche Hochschulbildung (Stufe 2)	Keine Erfahrung	In einer Kleinstadt, Nicht anwendbar	Nicht inklusiv (die Einrichtung führt keine speziellen Bildungsprogramme durch)	6 - 8 Jahre	21 - 25 Kinder	1 - 2	Nicht anwendbar	Sehr wichtig	Sehr wichtig	Ziemlich wichtig	Student*in
2025.16.5 12:14:43	Österreich	Steiermark	Weiblich	Derzeitige Qualifizierung	3 - 6 Jahre	In einem Ballungsgebiet	Inklusion (die Einrichtung führt spezielle Bildungsprogramme durch)	3 - 6 Jahre, 6 - 8 Jahre	21 - 25 Kinder	5 oder mehr	3 - 5 Kinder	Ziemlich wichtig	Sehr wichtig	Sehr wichtig	Student*in
2025.16.5 12:15:16	Österreich	Steiermark	Männlich	Berufliche Hochschulbildung (Stufe 1)	Keine Erfahrung	In einem ländlichen Gebiet	Nicht anwendbar	6 - 8 Jahre	16 - 20 Kinder	1 - 2	Keine	Sehr wichtig	Ziemlich wichtig	Ziemlich wichtig	Student*in
2025.16.5 12:36:51	Österreich	Steiermark	Weiblich	Derzeitige Qualifizierung	Mehr als 10 Jahre	Nicht anwendbar	Inklusion (die Einrichtung führt spezielle Bildungsprogramme durch)	3 - 6 Jahre	Nicht anwendbar	Nicht anwendbar	Nicht anwendbar	Sehr wichtig	Ziemlich wichtig	Ziemlich wichtig	Inklusionspädagog*in	Manchmal	Häufig	Häufig	Häufig	Manchmal	Immer	Immer	Häufig	Häufig	Immer	Immer	Manchmal	Manchmal	Häufig	Manchmal	Niemals	Häufig	Immer	Manchmal	Häufig	Manchmal	Manchmal	Manchmal	Niemals	Niemals	Häufig	Immer	Häufig	Immer	Immer	Immer	Manchmal	Häufig	Immer
2025.16.5 12:40:18	Österreich	Steiermark	Weiblich	Derzeitige Qualifizierung	Mehr als 10 Jahre	In einem ländlichen Gebiet	Inklusion (die Einrichtung führt spezielle Bildungsprogramme durch)	3 - 6 Jahre	21 - 25 Kinder	5 oder mehr	Keine	Sehr wichtig	Sehr wichtig	Sehr wichtig	Lehrer*in/Pädagog*in	Häufig	Immer	Manchmal	Manchmal	Manchmal	Häufig	Häufig	Häufig	Häufig	Häufig	Manchmal	Häufig	Immer	Manchmal	Häufig	Häufig	Häufig	Häufig	Häufig	Häufig	Manchmal	Häufig	Häufig	Immer	Häufig	Häufig	Manchmal	Immer	Immer	Häufig	Häufig	Häufig	Manchmal	Immer
2025.16.5 13:33:56	Österreich	Steiermark	Weiblich	Berufliche Hochschulbildung (Stufe 1)	Mehr als 10 Jahre	In einem ländlichen Gebiet	Inklusion (die Einrichtung führt spezielle Bildungsprogramme durch)	Gemischte Altersgruppen	Nicht anwendbar	Nicht anwendbar	3 - 5 Kinder	Sehr wichtig	Sehr wichtig	Neutral, keine Meinung	Lehrer*in/Pädagog*in	Manchmal	Häufig, Immer	Manchmal	Häufig	Manchmal	Häufig	Häufig	Häufig	Häufig	Häufig	Häufig	Häufig	Manchmal	Niemals	Niemals	Niemals	Häufig	Häufig	Manchmal	Manchmal	Manchmal	Manchmal	Häufig	Häufig	Häufig	Manchmal	Manchmal	Immer	Immer	Manchmal	Manchmal	Manchmal	Manchmal	Manchmal
2025.16.5 16:15:28	Österreich	Steiermark	Weiblich	Derzeitige Qualifizierung	Mehr als 10 Jahre	In einem ländlichen Gebiet	Inklusion (die Einrichtung führt spezielle Bildungsprogramme durch)	3 - 6 Jahre	26 oder mehr Kinder, Nicht anwendbar	5 oder mehr, Nicht anwendbar	3 - 5 Kinder	Ziemlich wichtig	Ziemlich wichtig	Neutral, keine Meinung	Lehrer*in/Pädagog*in	Häufig	Häufig	Häufig	Häufig	Immer	Häufig, Immer	Immer	Häufig	Immer	Häufig	Häufig	Immer	Häufig	Immer	Häufig	Häufig	Häufig	Immer	Häufig	Manchmal	Manchmal	Immer	Immer	Häufig	Immer	Häufig	Häufig	Häufig	Häufig	Häufig	Manchmal	Manchmal	Manchmal	Häufig
2025.16.5 16:15:39	Österreich	Steiermark	Weiblich	Derzeitige Qualifizierung	Keine Erfahrung	Nicht anwendbar	Nicht anwendbar	Nicht anwendbar	Nicht anwendbar	Nicht anwendbar	Nicht anwendbar	Sehr wichtig	Ziemlich wichtig	Ziemlich wichtig	Student*in
2025.16.5 17:07:36	Österreich	Steiermark	Weiblich	Derzeitige Qualifizierung	1 - 2 Jahre	In einem ländlichen Gebiet	Inklusion (die Einrichtung führt spezielle Bildungsprogramme durch)	6 - 8 Jahre	16 - 20 Kinder	2 - 4	Nicht anwendbar	Neutral, keine Meinung	Neutral, keine Meinung	Neutral, keine Meinung	Student*in
2025.16.5 18:21:53	Österreich	Steiermark	Weiblich	Berufliche Hochschulbildung (Stufe 1)	Mehr als 10 Jahre	In einem Ballungsgebiet, In einem ländlichen Gebiet	Inklusion (die Einrichtung führt spezielle Bildungsprogramme durch)	3 - 6 Jahre	21 - 25 Kinder	1 - 2	1 - 2 Kinder	Sehr wichtig	Ziemlich wichtig	Neutral, keine Meinung	Inklusionspädagog*in	Immer	Immer	Immer	Immer	Manchmal	Häufig	Manchmal	Häufig	Immer	Häufig	Immer	Häufig	Häufig	Manchmal	Manchmal	Manchmal	Manchmal	Häufig	Manchmal	Häufig		Manchmal	Häufig	Manchmal	Häufig, Immer	Häufig	Manchmal, Häufig	Manchmal	Häufig	Immer	Häufig	Manchmal, Häufig	Manchmal	Häufig
2025.17.5 11:03:05	Österreich	Steiermark	Weiblich	Derzeitige Qualifizierung	3 - 6 Jahre	In einem ländlichen Gebiet	Inklusion (die Einrichtung führt spezielle Bildungsprogramme durch)	3 - 6 Jahre	21 - 25 Kinder	1 - 2	1 - 2 Kinder	Sehr wichtig	Ziemlich wichtig	Ziemlich wichtig	Student*in
2025.17.5 12:14:04	Österreich	Oberösterreich	Weiblich	Berufliche Hochschulbildung (Stufe 2)	3 - 6 Jahre	In einem ländlichen Gebiet	Inklusion (die Einrichtung führt spezielle Bildungsprogramme durch)	1 - 3 Jahre, 3 - 6 Jahre	11 - 15 Kinder, 16 - 20 Kinder	2 - 4	Keine	Eher unwichtig	Eher unwichtig	Eher unwichtig	Lehrer*in/Pädagog*in	Manchmal	Manchmal	Niemals	Niemals	Manchmal	Manchmal	Niemals	Niemals	Niemals	Niemals	Manchmal	Manchmal	Niemals	Manchmal	Niemals	Niemals	Manchmal	Niemals	Niemals	Niemals	Manchmal	Immer	Immer	Häufig	Immer	Manchmal	Manchmal	Manchmal	Niemals	Niemals	Niemals	Häufig	Manchmal	Häufig
2025.17.5 13:00:35	Österreich	Steiermark	Weiblich	Bachelor-Abschluss	3 - 6 Jahre	In einer Kleinstadt	Inklusion (die Einrichtung führt spezielle Bildungsprogramme durch)	6 - 8 Jahre	16 - 20 Kinder	Nicht anwendbar	Keine	Ziemlich wichtig	Ziemlich wichtig	Neutral, keine Meinung	Lehrer*in/Pädagog*in	Manchmal	Manchmal	Häufig	Häufig	Manchmal	Häufig	Manchmal	Immer	Häufig	Manchmal	Manchmal	Häufig	Häufig	Niemals	Manchmal	Häufig	Manchmal	Häufig	Manchmal	Manchmal	Häufig	Häufig	Häufig	Manchmal	Manchmal	Häufig	Häufig	Manchmal	Häufig	Häufig	Manchmal	Niemals	Häufig	Häufig
2025.18.5 10:14:24	Österreich	Steiermark	Weiblich	Berufliche Hochschulbildung (Stufe 1)	Keine Erfahrung	Nicht anwendbar	Nicht anwendbar	Nicht anwendbar	Nicht anwendbar	Nicht anwendbar	Nicht anwendbar	Sehr wichtig	Sehr wichtig	Ziemlich wichtig	Student*in
2025.19.5 07:55:40	Österreich	Steiermark	Weiblich	Derzeitige Qualifizierung	Mehr als 10 Jahre	In einem ländlichen Gebiet	Inklusion (die Einrichtung führt spezielle Bildungsprogramme durch)	3 - 6 Jahre	21 - 25 Kinder	2 - 4	Mehr als 5 Kinder	Sehr wichtig	Sehr wichtig	Ziemlich wichtig	Lehrer*in/Pädagog*in	Häufig	Häufig	Immer	Manchmal	Immer	Manchmal	Immer	Häufig	Häufig	Manchmal	Manchmal	Manchmal	Häufig	Manchmal	Manchmal	Manchmal	Manchmal	Häufig	Manchmal	Manchmal	Niemals	Häufig	Manchmal	Manchmal	Manchmal	Häufig	Häufig	Immer	Immer	Häufig	Manchmal	Häufig	Manchmal	Häufig
2025.19.5 10:33:17	Österreich	Steiermark	Weiblich	Derzeitige Qualifizierung	Mehr als 10 Jahre	In einem ländlichen Gebiet	Inklusion (die Einrichtung führt spezielle Bildungsprogramme durch)	1 - 3 Jahre, 3 - 6 Jahre	Nicht anwendbar	5 oder mehr	Mehr als 5 Kinder	Sehr wichtig	Sehr wichtig	Sehr wichtig	Lehrer*in/Pädagog*in	Häufig	Häufig	Immer	Häufig	Häufig	Häufig	Häufig	Häufig	Häufig	Immer	Häufig	Manchmal	Häufig	Häufig	Häufig	Häufig	Häufig	Immer	Häufig	Häufig	Manchmal	Häufig	Immer	Häufig	Häufig	Häufig	Häufig	Häufig	Häufig	Häufig	Manchmal	Häufig	Häufig	Immer
2025.19.5 12:02:14	Österreich	Steiermark	Weiblich	Berufliche Hochschulbildung (Stufe 1)	3 - 6 Jahre	In einem ländlichen Gebiet	Inklusion (die Einrichtung führt spezielle Bildungsprogramme durch)	3 - 6 Jahre	21 - 25 Kinder	2 - 4	1 - 2 Kinder	Sehr wichtig	Ziemlich wichtig	Ziemlich wichtig	Lehrer*in/Pädagog*in	Häufig	Immer	Häufig	Immer	Immer	Manchmal	Häufig	Häufig, Immer	Immer	Häufig	Immer	Häufig	Häufig	Häufig	Häufig	Manchmal, Häufig	Häufig	Immer	Manchmal	Manchmal	Manchmal	Häufig	Häufig	Häufig	Häufig	Immer	Immer	Immer	Immer	Immer	Manchmal	Häufig	Häufig	Immer
2025.19.5 15:49:41	Österreich	Steiermark	Weiblich	Berufliche Hochschulbildung (Stufe 1)	6 - 10 Jahre	In einem ländlichen Gebiet	Nicht inklusiv (die Einrichtung führt keine speziellen Bildungsprogramme durch)	1 - 3 Jahre, 3 - 6 Jahre, Gemischte Altersgruppen	Nicht anwendbar	Nicht anwendbar	3 - 5 Kinder	Ziemlich wichtig	Ziemlich wichtig	Eher unwichtig, Neutral, keine Meinung	Lehrer*in/Pädagog*in	Häufig	Häufig	Manchmal	Häufig	Manchmal	Immer	Häufig	Manchmal	Häufig	Häufig	Manchmal	Häufig	Immer	Häufig	Häufig	Manchmal	Häufig	Häufig	Niemals	Manchmal	Häufig	Häufig	Manchmal	Häufig	Häufig	Häufig	Manchmal	Häufig	Häufig	Immer	Häufig	Manchmal	Manchmal	Häufig
2025.19.5 22:40:52	Österreich	Steiermark	Weiblich	Bachelor-Abschluss	Mehr als 10 Jahre	In einem ländlichen Gebiet	Inklusion (die Einrichtung führt spezielle Bildungsprogramme durch)	3 - 6 Jahre	21 - 25 Kinder	2 - 4	1 - 2 Kinder	Sehr wichtig	Ziemlich wichtig	Neutral, keine Meinung	Lehrer*in/Pädagog*in	Häufig	Häufig	Immer	Häufig	Häufig	Immer	Immer	Häufig	Immer	Häufig	Immer	Häufig	Immer	Häufig	Häufig	Häufig	Häufig	Immer	Häufig	Immer	Häufig	Häufig	Häufig	Immer	Häufig	Immer	Häufig	Immer	Immer	Häufig	Häufig	Manchmal	Häufig	Häufig
2025.20.5 06:44:02	Österreich	Oberösterreich	Weiblich	Bachelor-Abschluss	Mehr als 10 Jahre	In einer Kleinstadt	Nicht anwendbar	3 - 6 Jahre	21 - 25 Kinder	2 - 4	Keine	Ziemlich wichtig	Sehr wichtig	Ziemlich wichtig	Lehrer*in/Pädagog*in	Häufig	Immer	Manchmal	Immer	Manchmal	Häufig	Immer	Häufig	Häufig	Manchmal	Immer	Manchmal	Immer	Manchmal	Häufig	Manchmal	Häufig	Immer	Niemals	Häufig	Häufig	Immer	Häufig	Häufig	Immer	Häufig	Immer	Immer	Immer	Immer	Manchmal	Manchmal	Manchmal	Immer
2025.20.5 08:07:27	Österreich	Oö	Weiblich	Bachelor-Abschluss	6 - 10 Jahre	In einem Ballungsgebiet	Nicht anwendbar	3 - 6 Jahre	21 - 25 Kinder	2 - 4	Keine	Sehr wichtig	Ziemlich wichtig	Ziemlich wichtig	Lehrer*in/Pädagog*in	Immer	Häufig, Immer	Immer	Immer	Häufig	Immer	Häufig	Häufig	Immer	Häufig	Immer	Manchmal	Häufig	Häufig	Häufig	Häufig	Häufig	Häufig	Manchmal	Manchmal	Immer	Immer	Häufig	Immer	Immer	Häufig	Immer	Häufig	Immer	Immer	Manchmal	Häufig	Häufig	Immer
2025.20.5 09:28:15	Österreich	Steiermark	Weiblich	Berufliche Hochschulbildung (Stufe 2)	Mehr als 10 Jahre	In einem ländlichen Gebiet	Inklusion (die Einrichtung führt spezielle Bildungsprogramme durch)	3 - 6 Jahre	21 - 25 Kinder	1 - 2	3 - 5 Kinder	Ziemlich wichtig	Sehr wichtig	Sehr wichtig	Lehrer*in/Pädagog*in	Häufig	Immer	Immer	Häufig	Häufig	Häufig	Häufig	Immer	Immer	Häufig	Immer	Häufig	Häufig	Manchmal	Manchmal	Manchmal	Manchmal	Immer	Manchmal	Manchmal	Häufig	Häufig	Häufig	Immer	Immer	Immer	Häufig	Häufig	Häufig	Häufig	Manchmal	Manchmal	Manchmal	Immer
2025.20.5 12:04:03	Österreich	Steiermark	Weiblich	Derzeitige Qualifizierung, Berufliche Hochschulbildung (Stufe 1)	Mehr als 10 Jahre	In einem Ballungsgebiet	Inklusion (die Einrichtung führt spezielle Bildungsprogramme durch)	3 - 6 Jahre	21 - 25 Kinder	2 - 4	3 - 5 Kinder	Sehr wichtig	Ziemlich wichtig	Ziemlich wichtig	Lehrer*in/Pädagog*in	Häufig, Immer	Häufig, Immer	Häufig, Immer	Häufig, Immer	Häufig	Häufig, Immer	Immer	Manchmal, Häufig	Immer	Häufig, Immer	Häufig, Immer	Häufig	Manchmal	Niemals	Manchmal	Manchmal, Häufig	Niemals	Immer	Manchmal	Manchmal	Manchmal	Häufig, Immer	Häufig, Immer	Häufig, Immer	Häufig, Immer	Häufig, Immer	Häufig, Immer	Immer	Immer	Manchmal	Manchmal, Häufig	Häufig	Häufig, Immer	Häufig, Immer
2025.20.5 22:06:06	Österreich	Oberösterreich	Weiblich	Berufliche Hochschulbildung (Stufe 2)	6 - 10 Jahre	In einem Ballungsgebiet	Inklusion (die Einrichtung führt spezielle Bildungsprogramme durch)	Gemischte Altersgruppen	Nicht anwendbar	Nicht anwendbar	Mehr als 5 Kinder	Sehr wichtig	Sehr wichtig	Sehr wichtig	Inklusionspädagog*in	Häufig	Immer	Immer	Immer	Häufig	Immer	Immer	Häufig	Häufig	Immer	Immer	Häufig	Häufig	Immer	Immer	Häufig	Immer	Manchmal	Manchmal	Manchmal	Immer	Häufig	Häufig	Immer	Häufig	Immer	Häufig	Immer	Häufig	Häufig	Häufig	Häufig	Immer	Häufig
2025.20.5 23:40:23	Österreich	Oberösterreich	Weiblich	Bachelor-Abschluss	Mehr als 10 Jahre	In einem ländlichen Gebiet	Inklusion (die Einrichtung führt spezielle Bildungsprogramme durch)	3 - 6 Jahre	16 - 20 Kinder	2 - 4	3 - 5 Kinder	Sehr wichtig	Sehr wichtig	Ziemlich wichtig	Inklusionspädagog*in	Immer	Immer	Immer	Immer	Manchmal	Immer	Immer	Häufig	Immer	Häufig	Immer	Niemals	Häufig	Immer	Immer	Immer	Immer	Immer	Häufig	Immer	Immer	Häufig	Häufig	Immer	Immer	Immer	Immer	Häufig	Immer	Immer	Häufig	Manchmal	Manchmal	Immer
2025.21.5 00:02:07	Österreich	Steiermark	Weiblich	Master-Abschluss	6 - 10 Jahre	In einer Kleinstadt	Inklusion (die Einrichtung führt spezielle Bildungsprogramme durch)	6 - 8 Jahre	21 - 25 Kinder	2 - 4	3 - 5 Kinder	Sehr wichtig	Sehr wichtig	Sehr wichtig	Lehrer*in/Pädagog*in	Häufig	Häufig	Immer	Häufig	Immer	Immer	Immer	Immer	Immer	Immer	Häufig	Immer	Häufig	Häufig	Immer	Immer	Immer	Immer	Häufig	Immer	Immer	Immer	Häufig	Manchmal	Immer	Immer	Immer	Immer	Immer	Immer	Immer	Häufig	Häufig	Häufig
2025.21.5 17:41:03	Österreich	Steiermark	Weiblich	Berufliche Hochschulbildung (Stufe 1)	1 - 2 Jahre	In einer Kleinstadt	Inklusion (die Einrichtung führt spezielle Bildungsprogramme durch)	6 - 8 Jahre	16 - 20 Kinder	1 - 2	Keine	Sehr wichtig	Sehr wichtig	Sehr wichtig	Student*in
2025.22.5 10:32:07	Österreich		Weiblich	Derzeitige Qualifizierung	Mehr als 10 Jahre	In einem ländlichen Gebiet	Inklusion (die Einrichtung führt spezielle Bildungsprogramme durch)	3 - 6 Jahre	21 - 25 Kinder	1 - 2	1 - 2 Kinder	Sehr wichtig	Ziemlich wichtig	Ziemlich wichtig	Lehrer*in/Pädagog*in	Immer	Immer	Manchmal	Häufig	Manchmal	Häufig	Immer	Immer	Immer	Häufig	Häufig	Manchmal	Häufig	Manchmal	Manchmal	Häufig	Manchmal	Immer	Niemals	Manchmal	Niemals	Manchmal	Häufig	Häufig	Immer	Manchmal	Häufig	Häufig	Immer	Häufig	Häufig	Niemals	Niemals	Häufig
2025.22.5 18:07:03	Österreich	Steiermark	Weiblich	Berufliche Hochschulbildung (Stufe 1)	Mehr als 10 Jahre	In einem Ballungsgebiet	Inklusion (die Einrichtung führt spezielle Bildungsprogramme durch)	3 - 6 Jahre	6 - 10 Kinder, 16 - 20 Kinder	2 - 4	3 - 5 Kinder, Mehr als 5 Kinder	Sehr wichtig	Sehr wichtig	Ziemlich wichtig	Inklusionspädagog*in	Häufig	Häufig	Häufig	Häufig	Manchmal	Häufig	Manchmal	Immer	Häufig	Manchmal	Häufig	Manchmal	Häufig	Häufig	Häufig	Manchmal	Häufig	Häufig	Niemals		Häufig	Häufig	Manchmal	Manchmal	Häufig	Häufig	Häufig	Manchmal	Häufig	Häufig	Häufig	Manchmal	Manchmal	Häufig
2025.22.5 18:53:02	Österreich	Steiermark	Weiblich	Berufliche Hochschulbildung (Stufe 1)	Mehr als 10 Jahre	In einem Ballungsgebiet	Inklusion (die Einrichtung führt spezielle Bildungsprogramme durch)	3 - 6 Jahre	1 - 5 Kinder	2 - 4	1 - 2 Kinder	Sehr wichtig	Sehr wichtig	Ziemlich wichtig	Inklusionspädagog*in	Immer	Häufig	Immer	Immer	Manchmal	Häufig	Immer	Häufig	Immer	Häufig	Immer	Manchmal	Manchmal	Immer	Häufig	Manchmal	Häufig	Häufig	Manchmal	Häufig	Immer	Häufig	Häufig	Häufig	Immer	Immer	Häufig	Häufig	Immer	Immer	Häufig	Immer	Manchmal	Häufig
2025.22.5 20:02:26	Österreich	Steiermark	Weiblich	Bachelor-Abschluss	Mehr als 10 Jahre	In einem Ballungsgebiet	Inklusion (die Einrichtung führt spezielle Bildungsprogramme durch)	3 - 6 Jahre	21 - 25 Kinder	2 - 4	1 - 2 Kinder	Sehr wichtig	Sehr wichtig	Ziemlich wichtig	Inklusionspädagog*in	Häufig	Manchmal	Häufig	Immer	Manchmal	Immer	Häufig	Häufig	Immer	Manchmal	Immer	Manchmal	Immer	Niemals	Niemals	Niemals	Manchmal	Häufig	Manchmal	Manchmal	Niemals	Manchmal	Manchmal	Häufig	Manchmal	Immer	Immer	Häufig	Immer	Immer	Häufig	Häufig	Manchmal	Immer
2025.22.5 20:41:00	Österreich	Steiermark	Weiblich	Bachelor-Abschluss	3 - 6 Jahre	In einem ländlichen Gebiet	Nicht inklusiv (die Einrichtung führt keine speziellen Bildungsprogramme durch)	6 - 8 Jahre	16 - 20 Kinder	1 - 2	Keine	Ziemlich wichtig	Neutral, keine Meinung	Neutral, keine Meinung	Lehrer*in/Pädagog*in	Häufig	Manchmal	Häufig	Immer	Häufig	Häufig	Häufig	Häufig	Häufig	Immer	Immer	Immer	Immer	Manchmal	Häufig	Häufig	Häufig	Häufig	Häufig	Häufig	Häufig	Häufig	Häufig	Häufig	Häufig	Manchmal	Häufig	Häufig	Häufig	Häufig	Häufig	Häufig	Häufig	Häufig
2025.23.5 16:30:57	Österreich	Steiermark	Männlich	Derzeitige Qualifizierung	Keine Erfahrung	Nicht anwendbar	Nicht anwendbar	Nicht anwendbar	Nicht anwendbar	Nicht anwendbar	Nicht anwendbar				Student*in
2025.23.5 17:28:23	Österreich	Steiermark	Weiblich	Bachelor-Abschluss	Weniger als ein Jahr	In einem ländlichen Gebiet	Nicht inklusiv (die Einrichtung führt keine speziellen Bildungsprogramme durch)	6 - 8 Jahre, Gemischte Altersgruppen	16 - 20 Kinder	2 - 4	1 - 2 Kinder	Ziemlich wichtig	Ziemlich wichtig	Neutral, keine Meinung	Student*in
2025.24.5 12:03:28	Österreich	Steiermark	Weiblich	Berufliche Hochschulbildung (Stufe 1), Bachelor-Abschluss	Mehr als 10 Jahre	In einem ländlichen Gebiet	Inklusion (die Einrichtung führt spezielle Bildungsprogramme durch)	6 - 8 Jahre	16 - 20 Kinder	1 - 2	1 - 2 Kinder	Sehr wichtig	Sehr wichtig	Ziemlich wichtig	Inklusionspädagog*in	Manchmal	Häufig	Häufig	Häufig	Manchmal	Häufig	Immer	Häufig	Häufig	Häufig	Häufig	Manchmal	Häufig	Häufig	Häufig	Manchmal	Manchmal	Häufig		Manchmal	Häufig	Manchmal	Häufig	Häufig	Häufig	Häufig	Häufig	Häufig	Häufig	Häufig	Manchmal	Häufig	Manchmal	Häufig
2025.24.5 20:10:58	Österreich		Weiblich	Derzeitige Qualifizierung	Weniger als ein Jahr	In einem Ballungsgebiet, In einem ländlichen Gebiet	Inklusion (die Einrichtung führt spezielle Bildungsprogramme durch)	6 - 8 Jahre	16 - 20 Kinder	1 - 2	Keine	Ziemlich wichtig	Ziemlich wichtig	Neutral, keine Meinung	Student*in
2025.25.5 08:17:11	Österreich	Oberösterreich	Weiblich	Derzeitige Qualifizierung	Mehr als 10 Jahre	In einem ländlichen Gebiet	Inklusion (die Einrichtung führt spezielle Bildungsprogramme durch)	3 - 6 Jahre	16 - 20 Kinder	2 - 4	1 - 2 Kinder	Sehr wichtig	Sehr wichtig	Ziemlich wichtig	Lehrer*in/Pädagog*in	Manchmal, Häufig	Häufig	Manchmal	Häufig	Manchmal	Häufig	Immer	Häufig	Immer	Häufig	Immer	Niemals	Häufig		Häufig			Immer				Häufig	Häufig	Häufig	Immer	Häufig	Häufig	Immer	Immer	Häufig	Häufig
2025.26.5 12:30:21	Österreich	Steiermark	Weiblich	Berufliche Hochschulbildung (Stufe 1)	Mehr als 10 Jahre	In einem ländlichen Gebiet	Inklusion (die Einrichtung führt spezielle Bildungsprogramme durch)	1 - 3 Jahre, 3 - 6 Jahre, 6 - 8 Jahre	26 oder mehr Kinder	5 oder mehr	1 - 2 Kinder	Sehr wichtig	Sehr wichtig	Sehr wichtig	Lehrer*in/Pädagog*in	Häufig	Häufig	Immer	Häufig	Manchmal	Immer	Häufig		Häufig	Häufig	Immer	Immer	Häufig	Häufig	Häufig	Häufig	Immer	Immer	Häufig	Manchmal	Häufig	Häufig	Häufig	Häufig	Immer	Immer	Häufig	Immer	Immer	Immer	Häufig	Immer	Immer	Immer
2025.26.5 18:36:12	Österreich		Weiblich	Berufliche Hochschulbildung (Stufe 1)	1 - 2 Jahre	In einer Kleinstadt	Inklusion (die Einrichtung führt spezielle Bildungsprogramme durch)	0 - 12 Monate, 1 - 3 Jahre	21 - 25 Kinder	5 oder mehr	1 - 2 Kinder	Sehr wichtig	Sehr wichtig	Sehr wichtig	Lehrer*in/Pädagog*in	Häufig	Häufig	Immer	Immer	Manchmal	Immer	Häufig	Häufig	Immer	Häufig	Immer	Niemals	Manchmal, Häufig		Häufig	Häufig	Häufig	Immer	Manchmal	Manchmal	Häufig	Häufig	Häufig	Niemals	Häufig	Immer	Manchmal, Häufig	Immer	Häufig	Immer	Häufig	Manchmal	Manchmal	Immer
2025.26.5 22:39:00	Österreich	Kärnten	Weiblich	Berufliche Hochschulbildung (Stufe 1)	6 - 10 Jahre	In einem ländlichen Gebiet	Nicht inklusiv (die Einrichtung führt keine speziellen Bildungsprogramme durch)	1 - 3 Jahre	11 - 15 Kinder	2 - 4	1 - 2 Kinder	Sehr wichtig	Sehr wichtig	Neutral, keine Meinung	Lehrer*in/Pädagog*in	Häufig	Immer	Immer	Häufig	Niemals	Häufig	Häufig	Häufig	Immer	Niemals	Immer	Niemals	Immer	Manchmal	Häufig	Manchmal	Niemals	Manchmal	Niemals	Manchmal	Häufig	Manchmal	Häufig	Manchmal	Häufig	Immer	Häufig	Immer	Immer	Immer	Immer	Niemals	Niemals	Niemals
2025.27.5 08:55:11	Österreich	Kärnten	Weiblich	Derzeitige Qualifizierung	Mehr als 10 Jahre	In einem ländlichen Gebiet	Inklusion (die Einrichtung führt spezielle Bildungsprogramme durch)	3 - 6 Jahre	16 - 20 Kinder	2 - 4	1 - 2 Kinder	Ziemlich wichtig	Ziemlich wichtig	Ziemlich wichtig	Lehrer*in/Pädagog*in	Immer	Häufig	Immer	Immer	Immer	Immer	Immer	Immer	Immer	Häufig	Immer	Manchmal, Häufig	Häufig	Manchmal	Manchmal	Manchmal	Häufig	Häufig	Manchmal	Manchmal	Manchmal	Immer	Immer	Immer	Immer	Immer	Häufig	Häufig	Häufig	Häufig	Häufig	Häufig	Manchmal	Häufig
2025.27.5 16:41:48	Österreich	Steiermark	Weiblich	Bachelor-Abschluss	Mehr als 10 Jahre	In einem ländlichen Gebiet	Nicht inklusiv (die Einrichtung führt keine speziellen Bildungsprogramme durch)	3 - 6 Jahre	21 - 25 Kinder	2 - 4	1 - 2 Kinder	Sehr wichtig	Sehr wichtig	Neutral, keine Meinung	Lehrer*in/Pädagog*in	Häufig	Immer	Häufig	Immer	Häufig	Häufig	Immer	Immer	Immer	Häufig	Immer	Manchmal	Immer	Manchmal	Manchmal	Häufig	Niemals	Immer	Häufig	Manchmal	Niemals	Häufig	Häufig	Häufig	Manchmal	Häufig	Manchmal	Immer	Immer	Häufig	Manchmal	Immer	Manchmal	Manchmal
2025.28.5 12:15:40	Österreich	STMK	Weiblich	Derzeitige Qualifizierung	6 - 10 Jahre	In einem Ballungsgebiet	Inklusion (die Einrichtung führt spezielle Bildungsprogramme durch)	3 - 6 Jahre	21 - 25 Kinder	2 - 4	3 - 5 Kinder	Sehr wichtig	Sehr wichtig	Eher unwichtig	Lehrer*in/Pädagog*in	Immer	Immer	Immer	Immer	Manchmal	Immer	Häufig	Immer	Manchmal	Immer	Immer	Manchmal	Immer	Manchmal	Manchmal	Manchmal	Häufig	Häufig	Manchmal	Häufig	Manchmal	Häufig	Manchmal	Manchmal	Manchmal	Manchmal	Manchmal	Manchmal	Immer	Immer	Immer	Manchmal	Manchmal	Immer
2025.29.5 22:18:31	Österreich	Burgenland	Weiblich	Derzeitige Qualifizierung	Keine Erfahrung	Nicht anwendbar	Nicht anwendbar	Nicht anwendbar	Nicht anwendbar	Nicht anwendbar	Nicht anwendbar	Sehr wichtig	Sehr wichtig	Sehr wichtig	Student*in
2025.2.6 18:21:24	Österreich	Steiermakr	Weiblich	Berufliche Hochschulbildung (Stufe 2)	Weniger als ein Jahr	In einem ländlichen Gebiet	Inklusion (die Einrichtung führt spezielle Bildungsprogramme durch)	1 - 3 Jahre, 3 - 6 Jahre	11 - 15 Kinder	2 - 4	1 - 2 Kinder	Sehr wichtig	Ziemlich wichtig	Sehr wichtig	Student*in
2025.2.6 18:28:55	Österreich	Steiermark	Weiblich	Berufliche Hochschulbildung (Stufe 1)	6 - 10 Jahre	In einem ländlichen Gebiet	Inklusion (die Einrichtung führt spezielle Bildungsprogramme durch)	0 - 12 Monate, 1 - 3 Jahre	11 - 15 Kinder	2 - 4	Keine	Sehr wichtig	Neutral, keine Meinung	Sehr wichtig	Student*in
2025.2.6 19:03:45	Österreich	Steiermark	Weiblich	Derzeitige Qualifizierung	1 - 2 Jahre	In einer Kleinstadt	Nicht inklusiv (die Einrichtung führt keine speziellen Bildungsprogramme durch)	3 - 6 Jahre	16 - 20 Kinder	2 - 4	1 - 2 Kinder	Neutral, keine Meinung	Neutral, keine Meinung	Neutral, keine Meinung	Student*in
2025.2.6 19:04:58	Österreich	Steiermark	Weiblich	Derzeitige Qualifizierung	Weniger als ein Jahr	In einem ländlichen Gebiet	Inklusion (die Einrichtung führt spezielle Bildungsprogramme durch)	1 - 3 Jahre	6 - 10 Kinder	1 - 2	Keine	Sehr wichtig	Sehr wichtig	Sehr wichtig	Student*in
2025.2.6 19:07:15	Österreich	Steiermark	Weiblich	Berufliche Hochschulbildung (Stufe 1)	Weniger als ein Jahr	In einem ländlichen Gebiet	Inklusion (die Einrichtung führt spezielle Bildungsprogramme durch)	1 - 3 Jahre	11 - 15 Kinder	2 - 4	Keine	Sehr wichtig	Ziemlich wichtig	Ziemlich wichtig	Student*in
2025.2.6 19:08:29	Österreich	Steiermark	Weiblich	Derzeitige Qualifizierung	1 - 2 Jahre	In einem ländlichen Gebiet	Nicht inklusiv (die Einrichtung führt keine speziellen Bildungsprogramme durch)	1 - 3 Jahre	11 - 15 Kinder	2 - 4	Keine	Sehr wichtig	Ziemlich wichtig	Ziemlich wichtig	Student*in
2025.2.6 19:09:48	Österreich	Steiermark	Weiblich	Derzeitige Qualifizierung	Weniger als ein Jahr	In einem ländlichen Gebiet	Nicht inklusiv (die Einrichtung führt keine speziellen Bildungsprogramme durch)	1 - 3 Jahre, 3 - 6 Jahre	16 - 20 Kinder	2 - 4	Keine	Sehr wichtig	Ziemlich wichtig	Ziemlich wichtig	Student*in
2025.2.6 19:15:44	Österreich	Steiermark	Weiblich	Derzeitige Qualifizierung	3 - 6 Jahre	In einem ländlichen Gebiet	Inklusion (die Einrichtung führt spezielle Bildungsprogramme durch)	3 - 6 Jahre	21 - 25 Kinder	2 - 4	3 - 5 Kinder	Ziemlich wichtig	Sehr wichtig	Sehr wichtig	Lehrer*in/Pädagog*in	Häufig, Immer	Häufig, Immer	Häufig, Immer	Häufig, Immer	Häufig, Immer	Häufig	Häufig	Häufig, Immer	Immer	Immer	Immer	Immer	Häufig	Häufig	Häufig	Häufig	Immer	Immer	Manchmal	Manchmal	Häufig	Immer	Häufig	Immer	Immer	Manchmal	Manchmal	Häufig	Immer	Immer	Häufig	Immer	Immer	Immer
2025.5.6 23:38:48	Österreich	Steiermark	Weiblich	Berufliche Hochschulbildung (Stufe 1)	Mehr als 10 Jahre	In einem Ballungsgebiet	Inklusion (die Einrichtung führt spezielle Bildungsprogramme durch)	3 - 6 Jahre	26 oder mehr Kinder	5 oder mehr	Mehr als 5 Kinder	Sehr wichtig	Sehr wichtig	Ziemlich wichtig	Inklusionspädagog*in	Immer	Immer	Immer	Immer	Immer	Immer	Immer	Immer	Immer	Häufig	Immer	Immer	Immer	Häufig	Häufig	Immer	Immer	Immer	Häufig	Häufig	Häufig	Immer	Immer	Immer	Immer	Immer	Immer	Immer	Immer	Immer	Immer	Immer	Immer	Immer
2025.11.6 09:48:46	Österreich	BGLD	Weiblich	Berufliche Hochschulbildung (Stufe 1)	6 - 10 Jahre	In einer Kleinstadt	Inklusion (die Einrichtung führt spezielle Bildungsprogramme durch)	3 - 6 Jahre	21 - 25 Kinder	2 - 4	3 - 5 Kinder	Sehr wichtig	Ziemlich wichtig	Eher unwichtig	Lehrer*in/Pädagog*in	Immer	Immer	Immer	Immer	Manchmal	Häufig	Häufig	Häufig	Niemals	Immer	Immer	Immer	Immer	Manchmal	Manchmal	Immer	Immer	Häufig	Manchmal	Häufig	Manchmal	Manchmal	Manchmal	Manchmal	Manchmal	Immer	Immer	Immer	Immer	Häufig	Häufig	Niemals	Manchmal	Manchmal
2025.11.6 11:57:08	Österreich	Steiermark	Weiblich	Derzeitige Qualifizierung	Weniger als ein Jahr	Nicht anwendbar	Inklusion (die Einrichtung führt spezielle Bildungsprogramme durch)	6 - 8 Jahre	21 - 25 Kinder	1 - 2	Keine	Ziemlich wichtig	Sehr wichtig	Neutral, keine Meinung	Student*in
2025.11.6 11:57:10	Österreich	Steiermark	Weiblich	Berufliche Hochschulbildung (Stufe 1)	Keine Erfahrung	Nicht anwendbar	Nicht anwendbar	6 - 8 Jahre	Nicht anwendbar	Nicht anwendbar	Nicht anwendbar	Sehr wichtig	Sehr wichtig	Sehr wichtig	Student*in
2025.11.6 11:57:46	Österreich	Steiermark	Weiblich	Berufliche Hochschulbildung (Stufe 2)	Keine Erfahrung	In einem ländlichen Gebiet	Inklusion (die Einrichtung führt spezielle Bildungsprogramme durch)	6 - 8 Jahre	6 - 10 Kinder	5 oder mehr	3 - 5 Kinder	Neutral, keine Meinung	Neutral, keine Meinung	Neutral, keine Meinung	Student*in
2025.11.6 11:58:45	Österreich		Weiblich	Berufliche Hochschulbildung (Stufe 1)	1 - 2 Jahre	Nicht anwendbar	Inklusion (die Einrichtung führt spezielle Bildungsprogramme durch)	6 - 8 Jahre	21 - 25 Kinder	1 - 2	1 - 2 Kinder	Sehr wichtig	Ziemlich wichtig	Ziemlich wichtig	Student*in
2025.11.6 12:03:45	Österreich	Steiermark	Weiblich	Derzeitige Qualifizierung	Weniger als ein Jahr	In einem ländlichen Gebiet	Inklusion (die Einrichtung führt spezielle Bildungsprogramme durch)	6 - 8 Jahre	16 - 20 Kinder	2 - 4	1 - 2 Kinder	Sehr wichtig	Sehr wichtig	Sehr wichtig	Student*in
2025.11.6 13:05:37	Österreich	Steiermark	Weiblich	Berufliche Hochschulbildung (Stufe 1)	Weniger als ein Jahr	In einem Ballungsgebiet	Inklusion (die Einrichtung führt spezielle Bildungsprogramme durch)	6 - 8 Jahre	21 - 25 Kinder	1 - 2	1 - 2 Kinder	Ziemlich wichtig	Sehr wichtig	Neutral, keine Meinung, Ziemlich wichtig	Student*in
2025.11.6 13:20:42	Österreich	Steiermark	Weiblich	Berufliche Hochschulbildung (Stufe 1)	Keine Erfahrung	In einer Kleinstadt	Inklusion (die Einrichtung führt spezielle Bildungsprogramme durch)	6 - 8 Jahre	Nicht anwendbar	Nicht anwendbar	Nicht anwendbar	Sehr wichtig	Sehr wichtig	Sehr wichtig	Student*in
2025.11.6 13:20:55	Österreich	steiermark	Weiblich	Bachelor-Abschluss	1 - 2 Jahre	In einem Ballungsgebiet	Inklusion (die Einrichtung führt spezielle Bildungsprogramme durch)	1 - 3 Jahre, Gemischte Altersgruppen	11 - 15 Kinder	1 - 2	Keine	Ziemlich wichtig	Ziemlich wichtig	Ziemlich wichtig	Lehrer*in/Pädagog*in	Häufig	Häufig	Häufig	Häufig	Häufig	Häufig	Häufig	Häufig	Häufig	Häufig	Häufig	Häufig	Häufig	Häufig	Häufig	Häufig	Häufig	Manchmal	Manchmal	Manchmal	Manchmal	Häufig	Manchmal	Häufig	Manchmal	Manchmal	Häufig	Häufig	Häufig	Häufig	Häufig	Häufig	Häufig	Häufig
2025.11.6 13:21:58	Österreich		Weiblich	Berufliche Hochschulbildung (Stufe 1)	Keine Erfahrung	Nicht anwendbar		6 - 8 Jahre	16 - 20 Kinder	1 - 2	3 - 5 Kinder	Sehr wichtig	Sehr wichtig	Neutral, keine Meinung	Student*in
2025.11.6 13:22:13	Österreich	Steiermark	Weiblich	Derzeitige Qualifizierung	Keine Erfahrung	In einem ländlichen Gebiet	Inklusion (die Einrichtung führt spezielle Bildungsprogramme durch)	Nicht anwendbar	21 - 25 Kinder	1 - 2	Keine	Sehr wichtig	Sehr wichtig	Sehr wichtig	Student*in
2025.11.6 13:22:39	Österreich	Kärnten	Weiblich	Derzeitige Qualifizierung	1 - 2 Jahre	In einem Ballungsgebiet	Inklusion (die Einrichtung führt spezielle Bildungsprogramme durch)	6 - 8 Jahre	21 - 25 Kinder	1 - 2	Keine	Sehr wichtig	Ziemlich wichtig	Ziemlich wichtig	Student*in
2025.11.6 13:22:49	Österreich	Steiermark	Weiblich	Derzeitige Qualifizierung	1 - 2 Jahre	In einem ländlichen Gebiet	Nicht inklusiv (die Einrichtung führt keine speziellen Bildungsprogramme durch)	1 - 3 Jahre	11 - 15 Kinder	2 - 4	Keine	Sehr wichtig	Ziemlich wichtig	Sehr wichtig	Lehrer*in/Pädagog*in	Immer	Immer	Immer	Immer	Häufig	Immer	Immer	Immer	Immer	Häufig	Häufig	Manchmal	Manchmal	Häufig	Immer	Häufig	Häufig	Häufig	Häufig	Manchmal	Immer	Immer	Häufig	Häufig	Immer	Immer	Häufig	Immer	Immer	Immer	Immer	Häufig	Manchmal	Immer
2025.11.6 13:27:49	Österreich	Steiermark	Weiblich	Berufliche Hochschulbildung (Stufe 1)	1 - 2 Jahre	In einer Kleinstadt	Inklusion (die Einrichtung führt spezielle Bildungsprogramme durch)	6 - 8 Jahre	16 - 20 Kinder	1 - 2	1 - 2 Kinder	Sehr wichtig	Eher unwichtig, Ziemlich wichtig	Ziemlich wichtig, Sehr wichtig	Student*in
2025.12.6 21:37:12	Österreich	Kärnten	Weiblich	Berufliche Hochschulbildung (Stufe 2)	Mehr als 10 Jahre	In einem ländlichen Gebiet	Inklusion (die Einrichtung führt spezielle Bildungsprogramme durch)	3 - 6 Jahre	21 - 25 Kinder	2 - 4	1 - 2 Kinder	Sehr wichtig	Ziemlich wichtig	Ziemlich wichtig	Inklusionspädagog*in	Manchmal	Manchmal		Häufig	Manchmal	Häufig	Häufig	Häufig	Immer	Häufig	Immer	Häufig	Immer	Manchmal	Manchmal	Niemals	Manchmal	Häufig	Manchmal	Manchmal	Niemals	Manchmal	Häufig	Manchmal	Häufig	Häufig	Häufig	Häufig	Immer	Immer	Häufig	Häufig	Häufig	Häufig
2025.12.6 21:57:30	Österreich	Graz	Weiblich	Master-Abschluss	Mehr als 10 Jahre	In einem Ballungsgebiet	Inklusion (die Einrichtung führt spezielle Bildungsprogramme durch)	3 - 6 Jahre	21 - 25 Kinder	2 - 4	1 - 2 Kinder	Ziemlich wichtig	Ziemlich wichtig	Neutral, keine Meinung	Lehrer*in/Pädagog*in	Manchmal	Häufig	Immer	Häufig	Immer	Häufig	Immer	Häufig	Immer	Häufig	Häufig	Manchmal	Häufig	Manchmal	Manchmal	Häufig	Manchmal	Manchmal	Manchmal	Manchmal	Manchmal	Manchmal	Manchmal	Manchmal	Manchmal	Manchmal	Manchmal	Immer	Immer	Immer	Immer	Immer	Häufig	Häufig
2025.16.6 12:24:27	Österreich	Kärnten	Weiblich	Master-Abschluss	Mehr als 10 Jahre	In einem Ballungsgebiet, In einem ländlichen Gebiet	Inklusion (die Einrichtung führt spezielle Bildungsprogramme durch)	1 - 3 Jahre, 3 - 6 Jahre	21 - 25 Kinder	1 - 2	1 - 2 Kinder	Sehr wichtig	Ziemlich wichtig	Sehr wichtig	Inklusionspädagog*in	Immer	Manchmal	Immer	Manchmal	Manchmal	Immer	Häufig	Manchmal	Immer	Manchmal	Häufig	Niemals	Häufig	Manchmal	Manchmal	Manchmal	Manchmal	Immer	Manchmal	Manchmal	Manchmal	Häufig	Immer	Häufig	Immer	Häufig	Häufig	Immer	Immer	Häufig	Häufig	Manchmal	Manchmal	Häufig
2025.16.6 12:36:27	Österreich	Kärnten	Weiblich	Master-Abschluss	Mehr als 10 Jahre	In einem ländlichen Gebiet	Inklusion (die Einrichtung führt spezielle Bildungsprogramme durch)	3 - 6 Jahre	Nicht anwendbar	2 - 4	Nicht anwendbar	Sehr wichtig	Sehr wichtig	Sehr wichtig	Inklusionspädagog*in	Häufig	Häufig	Immer	Häufig	Immer	Immer	Häufig	Immer	Immer	Häufig	Immer	Häufig	Häufig	Häufig	Häufig	Immer	Häufig	Häufig	Häufig	Häufig	Häufig	Immer	Immer	Häufig	Häufig	Immer	Häufig, Immer	Häufig	Häufig		Häufig	Immer	Immer	Häufig
2025.16.6 12:55:41	Österreich	Kärnten	Weiblich	Berufliche Hochschulbildung (Stufe 1)	Mehr als 10 Jahre	Nicht anwendbar	Inklusion (die Einrichtung führt spezielle Bildungsprogramme durch)	1 - 3 Jahre, 3 - 6 Jahre	16 - 20 Kinder	2 - 4	3 - 5 Kinder	Sehr wichtig	Neutral, keine Meinung	Neutral, keine Meinung	Inklusionspädagog*in	Immer	Immer	Immer	Immer	Manchmal	Häufig	Manchmal	Häufig	Häufig	Manchmal	Manchmal	Niemals	Manchmal	Niemals	Niemals	Niemals	Niemals	Manchmal	Manchmal	Manchmal	Niemals	Manchmal	Manchmal, Häufig	Manchmal	Manchmal	Manchmal	Häufig	Häufig	Immer	Immer	Immer	Manchmal	Häufig	Manchmal
2025.16.6 22:59:48	Österreich	Kärnten	Weiblich	Derzeitige Qualifizierung	Mehr als 10 Jahre	In einem ländlichen Gebiet	Inklusion (die Einrichtung führt spezielle Bildungsprogramme durch)	3 - 6 Jahre	21 - 25 Kinder	1 - 2	1 - 2 Kinder, 3 - 5 Kinder	Ziemlich wichtig	Neutral, keine Meinung	Neutral, keine Meinung	Inklusionspädagog*in	Manchmal	Häufig	Immer	Häufig	Manchmal	Immer	Immer	Manchmal	Immer	Manchmal	Manchmal	Niemals	Manchmal	Häufig	Manchmal	Manchmal	Niemals	Manchmal	Manchmal	Niemals	Niemals	Niemals	Häufig	Häufig	Häufig	Häufig	Häufig	Häufig	Immer	Immer	Häufig	Manchmal	Manchmal	Manchmal
2025.17.6 14:41:49	Österreich	Steiermark	Weiblich	Berufliche Hochschulbildung (Stufe 1)	Mehr als 10 Jahre	In einem Ballungsgebiet	Nicht inklusiv (die Einrichtung führt keine speziellen Bildungsprogramme durch)	3 - 6 Jahre	21 - 25 Kinder	1 - 2	1 - 2 Kinder	Neutral, keine Meinung	Neutral, keine Meinung	Neutral, keine Meinung	Lehrer*in/Pädagog*in	Manchmal	Manchmal	Manchmal	Manchmal	Manchmal	Manchmal	Manchmal	Manchmal	Manchmal	Manchmal	Manchmal	Manchmal	Manchmal	Manchmal	Manchmal	Manchmal	Manchmal	Manchmal	Manchmal	Manchmal	Manchmal	Manchmal	Manchmal	Manchmal	Manchmal	Manchmal	Manchmal	Manchmal	Manchmal	Manchmal	Manchmal	Manchmal	Manchmal	Manchmal
2025.18.6 19:43:16	Österreich	Steiermark	Weiblich	Master-Abschluss	Mehr als 10 Jahre	In einem Ballungsgebiet	Inklusion (die Einrichtung führt spezielle Bildungsprogramme durch)	6 - 8 Jahre	21 - 25 Kinder	5 oder mehr	3 - 5 Kinder	Sehr wichtig	Sehr wichtig	Sehr wichtig	Inklusionspädagog*in	Immer	Häufig	Manchmal	Immer	Manchmal	Immer	Häufig	Immer	Immer	Häufig	Immer	Häufig	Immer	Häufig	Häufig	Manchmal	Häufig	Immer	Häufig	Immer	Häufig	Häufig	Häufig	Manchmal	Immer	Häufig	Immer	Immer	Immer	Immer	Immer	Häufig	Häufig	Manchmal
2025.20.6 10:32:37	Österreich	Kärnten	Weiblich	Berufliche Hochschulbildung (Stufe 1)	Mehr als 10 Jahre	In einer Kleinstadt	Inklusion (die Einrichtung führt spezielle Bildungsprogramme durch)	0 - 12 Monate, 1 - 3 Jahre, 3 - 6 Jahre	21 - 25 Kinder	2 - 4	3 - 5 Kinder	Sehr wichtig	Sehr wichtig	Sehr wichtig	Inklusionspädagog*in	Häufig	Immer	Häufig	Häufig	Häufig	Immer	Häufig	Häufig	Manchmal	Häufig	Immer	Manchmal	Häufig	Manchmal	Manchmal	Manchmal	Häufig	Immer	Niemals	Manchmal	Manchmal	Immer	Häufig	Häufig	Immer	Häufig	Häufig	Häufig	Immer	Häufig	Häufig	Häufig	Häufig	Häufig
2025.22.6 15:39:46	Österreich	Kärnten	Weiblich	Derzeitige Qualifizierung	6 - 10 Jahre	In einem Ballungsgebiet	Nicht inklusiv (die Einrichtung führt keine speziellen Bildungsprogramme durch)	3 - 6 Jahre	21 - 25 Kinder	2 - 4	Keine	Sehr wichtig	Sehr wichtig	Eher unwichtig	Lehrer*in/Pädagog*in	Immer	Immer	Immer	Immer	Häufig	Immer	Immer	Immer	Manchmal	Manchmal	Immer	Manchmal	Immer	Niemals	Niemals	Immer	Manchmal	Immer	Immer	Immer	Manchmal	Immer	Häufig	Manchmal	Häufig	Immer	Manchmal	Manchmal	Immer	Manchmal	Manchmal	Manchmal	Manchmal	Manchmal
2025.23.6 17:09:23	Österreich	Stmk	Weiblich	Bachelor-Abschluss	Mehr als 10 Jahre	In einem Ballungsgebiet	Inklusion (die Einrichtung führt spezielle Bildungsprogramme durch)	3 - 6 Jahre	21 - 25 Kinder	2 - 4	1 - 2 Kinder	Neutral, keine Meinung	Neutral, keine Meinung	Neutral, keine Meinung	Lehrer*in/Pädagog*in	Immer	Immer	Immer	Immer	Manchmal	Immer	Immer	Immer	Manchmal	Immer	Immer	Immer	Immer	Manchmal	Manchmal	Manchmal	Manchmal	Immer	Immer	Immer	Immer	Manchmal	Häufig	Manchmal	Immer	Immer	Immer	Immer	Immer	Immer	Immer	Manchmal	Manchmal	Häufig
2025.25.6 10:43:23	Österreich	Steiermark	Weiblich	Berufliche Hochschulbildung (Stufe 1), Berufliche Hochschulbildung (Stufe 2)	Mehr als 10 Jahre	In einem Ballungsgebiet	Inklusion (die Einrichtung führt spezielle Bildungsprogramme durch)	3 - 6 Jahre	21 - 25 Kinder	2 - 4	1 - 2 Kinder	Sehr wichtig	Sehr wichtig	Ziemlich wichtig	Lehrer*in/Pädagog*in	Häufig	Häufig	Immer	Häufig	Häufig	Immer	Manchmal	Häufig	Immer	Manchmal	Immer	Manchmal	Häufig	Niemals	Manchmal	Manchmal	Häufig	Häufig	Manchmal	Manchmal	Manchmal	Häufig	Häufig	Immer	Manchmal	Manchmal	Manchmal	Häufig	Häufig	Immer	Manchmal	Manchmal	Niemals	Immer
2025.1.7 14:03:22	Österreich	Kärnten	Weiblich	Berufliche Hochschulbildung (Stufe 1)	Mehr als 10 Jahre	In einem ländlichen Gebiet	Inklusion (die Einrichtung führt spezielle Bildungsprogramme durch)	3 - 6 Jahre	21 - 25 Kinder	1 - 2	1 - 2 Kinder	Sehr wichtig	Sehr wichtig	Sehr wichtig	Lehrer*in/Pädagog*in	Häufig	Häufig	Häufig	Häufig	Immer	Immer	Immer	Immer	Immer	Häufig	Immer	Manchmal, Häufig	Häufig	Manchmal	Manchmal	Niemals	Häufig	Häufig	Häufig	Niemals	Niemals	Manchmal	Manchmal	Manchmal	Häufig	Häufig	Häufig	Häufig	Häufig	Häufig	Häufig	Häufig	Manchmal	Häufig
2025.1.7 14:42:47	Österreich	Kärnten	Weiblich	Berufliche Hochschulbildung (Stufe 2)	Mehr als 10 Jahre	In einem ländlichen Gebiet	Inklusion (die Einrichtung führt spezielle Bildungsprogramme durch)	3 - 6 Jahre	16 - 20 Kinder	2 - 4	3 - 5 Kinder	Sehr wichtig	Nicht wichtig	Ziemlich wichtig	Inklusionspädagog*in	Manchmal	Manchmal	Manchmal	Manchmal	Manchmal	Manchmal	Manchmal	Manchmal		Manchmal	Manchmal	Manchmal	Niemals	Niemals	Manchmal	Manchmal	Manchmal	Manchmal	Manchmal	Manchmal	Manchmal	Manchmal	Manchmal	Manchmal	Manchmal	Niemals	Niemals	Niemals, Manchmal	Niemals, Manchmal	Manchmal	Niemals, Manchmal	Manchmal	Manchmal	Manchmal
2025.3.7 09:43:01	Österreich	Steiermark	Weiblich	Bachelor-Abschluss	Mehr als 10 Jahre	In einem Ballungsgebiet	Inklusion (die Einrichtung führt spezielle Bildungsprogramme durch)	3 - 6 Jahre	6 - 10 Kinder	2 - 4	Mehr als 5 Kinder	Sehr wichtig	Sehr wichtig	Sehr wichtig	Inklusionspädagog*in	Häufig	Häufig	Immer	Immer	Niemals	Immer	Häufig	Immer	Immer	Häufig	Immer	Häufig	Häufig	Niemals	Manchmal	Manchmal	Häufig	Häufig	Manchmal	Häufig	Häufig	Niemals	Manchmal	Manchmal	Niemals	Immer	Immer	Immer	Immer	Häufig	Manchmal	Manchmal, Immer	Niemals	Häufig
2025.14.7 10:52:56	Österreich	Stmk	Weiblich	Master-Abschluss	Mehr als 10 Jahre	In einem Ballungsgebiet	Inklusion (die Einrichtung führt spezielle Bildungsprogramme durch)	3 - 6 Jahre	1 - 5 Kinder	2 - 4	3 - 5 Kinder	Sehr wichtig	Sehr wichtig	Sehr wichtig	Lehrer*in/Pädagog*in	Immer	Immer	Immer	Immer	Manchmal	Immer	Immer	Immer	Manchmal	Immer	Immer	Immer	Immer	Immer	Immer	Immer	Manchmal	Immer	Immer	Immer	Immer	Immer	Immer	Häufig	Häufig	Immer	Immer	Immer	Immer	Immer	Immer	Manchmal	Immer	Immer
2025.14.7 10:59:48	Österreich	STMK	Weiblich	Derzeitige Qualifizierung	1 - 2 Jahre	In einem Ballungsgebiet	Inklusion (die Einrichtung führt spezielle Bildungsprogramme durch)	3 - 6 Jahre	21 - 25 Kinder	1 - 2	3 - 5 Kinder	Sehr wichtig	Sehr wichtig	Sehr wichtig	Lehrer*in/Pädagog*in	Immer	Immer	Immer	Immer	Immer	Immer	Immer	Immer	Häufig	Immer	Immer	Häufig	Manchmal	Immer	Manchmal	Häufig	Manchmal	Immer	Immer	Immer	Manchmal	Manchmal	Häufig	Häufig	Häufig	Immer	Manchmal	Häufig	Häufig	Häufig	Häufig	Manchmal	Manchmal	Häufig
2025.14.7 19:02:54	Österreich	Steiermark	Weiblich	Bachelor-Abschluss	3 - 6 Jahre	In einem Ballungsgebiet	Nicht inklusiv (die Einrichtung führt keine speziellen Bildungsprogramme durch)	3 - 6 Jahre	21 - 25 Kinder	1 - 2	Keine	Sehr wichtig	Sehr wichtig	Ziemlich wichtig	Lehrer*in/Pädagog*in	Häufig	Manchmal	Häufig	Manchmal	Häufig	Häufig	Häufig	Häufig	Immer	Häufig	Manchmal	Manchmal	Häufig	Manchmal	Manchmal	Manchmal	Immer	Immer	Manchmal	Manchmal	Manchmal	Manchmal	Häufig	Häufig	Manchmal	Häufig	Manchmal	Häufig	Häufig	Häufig	Manchmal	Häufig	Niemals	Häufig
2025.15.7 12:03:01	Österreich	Steiermark	Weiblich	Master-Abschluss	Mehr als 10 Jahre	In einem Ballungsgebiet	Inklusion (die Einrichtung führt spezielle Bildungsprogramme durch)	3 - 6 Jahre	21 - 25 Kinder	1 - 2	1 - 2 Kinder	Ziemlich wichtig	Ziemlich wichtig	Sehr wichtig	Lehrer*in/Pädagog*in	Häufig	Häufig	Immer	Immer	Häufig	Immer	Immer	Immer	Immer	Häufig	Häufig	Häufig	Immer	Häufig	Häufig	Häufig, Immer	Häufig	Immer	Immer	Immer	Immer	Immer	Immer	Häufig	Immer	Immer	Immer	Immer	Häufig	Häufig	Immer	Häufig	Häufig	Häufig
2025.20.7 20:53:17	Österreich	Wien	Weiblich	Bachelor-Abschluss	Mehr als 10 Jahre	In einem Ballungsgebiet	Inklusion (die Einrichtung führt spezielle Bildungsprogramme durch)	3 - 6 Jahre	16 - 20 Kinder	2 - 4	Mehr als 5 Kinder	Sehr wichtig	Sehr wichtig	Ziemlich wichtig	Lehrer*in/Pädagog*in	Manchmal	Häufig	Häufig	Immer	Manchmal	Häufig	Häufig	Manchmal	Häufig	Häufig	Häufig	Manchmal	Manchmal	Manchmal	Manchmal	Manchmal	Häufig	Immer	Niemals	Häufig	Manchmal	Manchmal	Häufig	Häufig	Immer	Häufig	Immer	Manchmal	Häufig	Immer	Häufig	Manchmal	Manchmal	Häufig
2025.13.8 11:46:44	Österreich	Steiermark	Weiblich	Bachelor-Abschluss	1 - 2 Jahre	In einem ländlichen Gebiet	Inklusion (die Einrichtung führt spezielle Bildungsprogramme durch)	6 - 8 Jahre	11 - 15 Kinder	1 - 2	Keine	Sehr wichtig	Sehr wichtig	Sehr wichtig	Lehrer*in/Pädagog*in	Häufig	Häufig	Häufig	Immer	Häufig	Häufig	Immer	Häufig	Häufig	Häufig	Häufig	Manchmal	Häufig	Immer	Immer	Manchmal	Immer	Häufig	Manchmal	Manchmal	Immer	Immer	Manchmal	Häufig	Häufig	Häufig	Immer	Häufig	Häufig	Immer	Häufig	Häufig	Häufig	Immer
2025.2.9 15:04:54	Österreich	Steiermark	Weiblich	Derzeitige Qualifizierung	Mehr als 10 Jahre	In einer Kleinstadt	Inklusion (die Einrichtung führt spezielle Bildungsprogramme durch)	Gemischte Altersgruppen	16 - 20 Kinder	2 - 4	1 - 2 Kinder	Sehr wichtig	Sehr wichtig	Eher unwichtig	Inklusionspädagog*in	Häufig	Immer	Immer	Immer	Manchmal	Häufig	Häufig	Immer	Häufig	Manchmal	Häufig	Niemals	Häufig	Häufig	Häufig	Manchmal	Häufig	Häufig	Manchmal	Immer	Häufig	Immer	Häufig	Häufig	Häufig	Immer	Manchmal	Immer	Immer	Immer	Immer	Immer	Manchmal	Manchmal
2025.3.9 07:35:16	Österreich	Steiermark	Weiblich	Derzeitige Qualifizierung	Mehr als 10 Jahre	In einem Ballungsgebiet	Inklusion (die Einrichtung führt spezielle Bildungsprogramme durch)	Gemischte Altersgruppen	16 - 20 Kinder	2 - 4	1 - 2 Kinder	Sehr wichtig	Ziemlich wichtig	Ziemlich wichtig	Lehrer*in/Pädagog*in	Häufig	Immer	Immer	Häufig	Häufig	Immer	Immer	Manchmal, Immer	Immer	Manchmal	Immer	Häufig	Immer	Manchmal	Häufig	Immer	Manchmal	Immer	Häufig	Immer	Häufig	Immer	Immer	Immer	Immer	Häufig	Häufig	Häufig	Immer	Immer	Manchmal	Manchmal	Häufig	Häufig
2025.9.9 15:59:48	Österreich	Steiermark	Weiblich	Derzeitige Qualifizierung	Mehr als 10 Jahre	In einem ländlichen Gebiet	Nicht inklusiv (die Einrichtung führt keine speziellen Bildungsprogramme durch)	1 - 3 Jahre, 3 - 6 Jahre, Gemischte Altersgruppen	16 - 20 Kinder	2 - 4	1 - 2 Kinder	Sehr wichtig	Eher unwichtig	Ziemlich wichtig	Lehrer*in/Pädagog*in	Häufig	Immer	Immer	Manchmal	Häufig	Häufig	Immer	Häufig	Immer	Immer	Immer	Manchmal	Immer	Manchmal	Häufig	Manchmal	Manchmal	Immer	Niemals	Häufig	Immer	Häufig	Immer	Immer	Immer	Immer	Immer	Häufig	Immer	Immer	Häufig	Manchmal	Manchmal	Manchmal
2025.9.9 18:13:38	Österreich	Steiermark	Weiblich	Master-Abschluss	6 - 10 Jahre	In einer Kleinstadt	Inklusion (die Einrichtung führt spezielle Bildungsprogramme durch)	3 - 6 Jahre, 6 - 8 Jahre	21 - 25 Kinder	1 - 2	1 - 2 Kinder	Sehr wichtig	Sehr wichtig	Sehr wichtig	Lehrer*in/Pädagog*in	Häufig	Immer	Häufig	Immer	Häufig	Häufig	Häufig	Häufig	Manchmal	Manchmal	Immer	Immer	Häufig	Häufig	Häufig	Häufig	Immer	Immer	Manchmal	Manchmal	Häufig	Immer	Immer	Immer	Häufig	Häufig	Häufig	Häufig	Manchmal	Häufig	Manchmal	Häufig	Manchmal	Häufig
2025.9.9 21:54:33	Österreich	Steiermark	Weiblich	Berufliche Hochschulbildung (Stufe 1)	Mehr als 10 Jahre	In einem ländlichen Gebiet	Nicht anwendbar	3 - 6 Jahre	21 - 25 Kinder	1 - 2	3 - 5 Kinder	Sehr wichtig	Sehr wichtig	Sehr wichtig	Inklusionspädagog*in	Häufig	Immer	Häufig	Häufig	Manchmal	Immer	Häufig	Häufig	Immer	Häufig	Immer	Manchmal	Immer	Niemals	Häufig	Manchmal	Häufig	Häufig	Manchmal	Manchmal	Manchmal	Manchmal	Häufig	Häufig	Häufig	Immer	Häufig	Häufig	Immer	Häufig	Häufig	Häufig	Niemals	Immer
2025.10.9 06:18:38	Österreich	Steiermark	Weiblich	Derzeitige Qualifizierung	Mehr als 10 Jahre	In einem ländlichen Gebiet	Inklusion (die Einrichtung führt spezielle Bildungsprogramme durch)	Gemischte Altersgruppen	16 - 20 Kinder	2 - 4	Keine	Neutral, keine Meinung	Neutral, keine Meinung	Neutral, keine Meinung	Lehrer*in/Pädagog*in	Häufig	Immer	Häufig	Immer	Manchmal	Häufig	Häufig	Häufig	Immer	Manchmal	Häufig	Niemals	Häufig	Häufig	Manchmal	Häufig	Häufig	Häufig	Häufig	Manchmal	Häufig	Häufig	Manchmal	Häufig	Immer	Manchmal	Häufig	Häufig	Häufig	Häufig	Manchmal	Manchmal	Niemals	Manchmal
2025.10.9 18:55:45	Österreich	Steiermark	Weiblich	Berufliche Hochschulbildung (Stufe 1)	Mehr als 10 Jahre	In einem ländlichen Gebiet	Inklusion (die Einrichtung führt spezielle Bildungsprogramme durch)	3 - 6 Jahre	6 - 10 Kinder	2 - 4	Mehr als 5 Kinder	Sehr wichtig	Sehr wichtig	Sehr wichtig	Inklusionspädagog*in	Manchmal	Manchmal	Häufig	Häufig	Immer	Häufig	Immer	Manchmal	Immer	Immer	Immer	Immer	Immer	Häufig	Manchmal	Manchmal	Häufig	Immer	Manchmal	Manchmal	Niemals	Häufig	Häufig	Manchmal	Häufig	Häufig	Manchmal	Häufig	Manchmal	Häufig	Manchmal	Niemals	Manchmal	Manchmal
2025.11.9 16:23:08	Österreich	Burgenland	Weiblich	Derzeitige Qualifizierung	Mehr als 10 Jahre	In einem ländlichen Gebiet	Inklusion (die Einrichtung führt spezielle Bildungsprogramme durch)	3 - 6 Jahre	21 - 25 Kinder	2 - 4	1 - 2 Kinder	Sehr wichtig	Sehr wichtig	Sehr wichtig	Inklusionspädagog*in	Häufig	Häufig	Häufig	Immer	Häufig	Immer	Immer	Immer	Immer	Niemals	Immer	Manchmal	Immer	Häufig	Häufig	Immer	Niemals	Häufig	Immer	Immer	Immer	Immer	Immer	Immer	Immer	Immer	Immer	Häufig	Immer	Immer	Häufig	Häufig	Manchmal	Immer
2025.12.9 18:39:35	Österreich	Burgenland	Weiblich	Derzeitige Qualifizierung	Mehr als 10 Jahre	In einem ländlichen Gebiet	Inklusion (die Einrichtung führt spezielle Bildungsprogramme durch)	3 - 6 Jahre	21 - 25 Kinder	2 - 4	1 - 2 Kinder	Sehr wichtig	Ziemlich wichtig	Sehr wichtig	Inklusionspädagog*in	Manchmal	Immer	Häufig	Immer	Häufig	Immer	Immer	Häufig	Immer	Häufig	Immer	Niemals	Manchmal	Manchmal	Immer	Häufig	Manchmal	Häufig	Niemals	Niemals	Häufig	Häufig	Immer	Häufig	Immer	Häufig	Immer	Manchmal	Manchmal	Häufig	Manchmal	Manchmal	Niemals	Häufig
2025.15.9 19:17:23	Österreich	Steiermark	Weiblich	Master-Abschluss	Mehr als 10 Jahre	In einer Kleinstadt	Inklusion (die Einrichtung führt spezielle Bildungsprogramme durch)	3 - 6 Jahre	21 - 25 Kinder	2 - 4	Mehr als 5 Kinder	Sehr wichtig	Neutral, keine Meinung	Sehr wichtig	Inklusionspädagog*in	Häufig	Immer	Häufig	Immer	Häufig	Häufig	Häufig	Immer	Immer	Häufig	Immer	Manchmal	Häufig	Manchmal	Immer	Häufig	Immer	Immer	Manchmal	Immer	Häufig	Immer	Immer	Immer	Immer	Immer	Immer	Häufig	Immer	Häufig	Häufig	Manchmal	Niemals	Häufig, Immer
2025.19.9 12:50:40	Österreich	Kärnten	Weiblich	Bachelor-Abschluss	6 - 10 Jahre	In einer Kleinstadt	Nicht inklusiv (die Einrichtung führt keine speziellen Bildungsprogramme durch)	3 - 6 Jahre	21 - 25 Kinder	2 - 4	Keine	Sehr wichtig	Sehr wichtig	Sehr wichtig	Lehrer*in/Pädagog*in	Immer	Immer	Immer	Immer	Immer	Immer	Immer	Immer	Immer	Immer	Immer	Häufig	Immer	Manchmal	Manchmal	Immer	Immer	Immer	Immer	Manchmal	Manchmal	Immer	Immer	Häufig	Häufig	Manchmal	Niemals	Manchmal	Immer	Manchmal	Manchmal	Häufig	Häufig	Manchmal
2025.24.9 13:08:17	Österreich	Steiermark	Weiblich	Bachelor-Abschluss	6 - 10 Jahre	In einem Ballungsgebiet	Inklusion (die Einrichtung führt spezielle Bildungsprogramme durch)	3 - 6 Jahre	21 - 25 Kinder	2 - 4	1 - 2 Kinder	Sehr wichtig	Sehr wichtig	Ziemlich wichtig	Lehrer*in/Pädagog*in	Häufig	Häufig	Manchmal	Manchmal	Häufig	Häufig	Häufig	Immer	Immer	Häufig	Häufig	Manchmal	Häufig	Manchmal	Manchmal	Manchmal	Häufig	Häufig	Manchmal	Manchmal	Manchmal	Häufig	Häufig	Immer	Manchmal	Häufig	Manchmal	Häufig	Häufig	Häufig	Häufig	Manchmal	Manchmal	Häufig
[truncated: 42 more columns]
