# Supplementary material
Source: Research Square preprint supplement (doi:10.21203/rs.3.rs-9452587/v1)
Supplement: Supplementary file 5 [file 7add55ee06165c08eaa35a94.docx]

*Supplementary Table S2*

|  | Austria | Czech Republic | Latvia | Portugal |
| --- | --- | --- | --- | --- |
| Demographic Characteristic | N (%) | N (%) | N (%) | N (%) |
| Total Respondents  (N = 440) | 123 (27.9) | 108 (24.5) | 108 (24.5) | 101 (22.9) |
| 1.2. Gender | | | | |
| Female | 120 (97.6) | 106 (98.1) | 108 (100) | 95 (94.1) |
| Male | 3 (2.4) | 2 (1.9) | - | 6 (5.9) |
| Prefer not to answer | - | - | - | - |
| Total | 123 | 108 | 108 | 101 |
| 1.3. Highest level of academic qualification | | | | |
| Currently pursuing qualification | 42 (34.1) | 19 (17.6) | 21 (19.4) | 10 (9.9) |
| Qualification Nanny for children in a children's group | - | 5 (4.6) | - | - |
| Professional higher education (Level 1) | 38 (30.9) | 29 (26.9) | 23 (21.3) | 14 (13.9) |
| Bachelor’s degree | 23 (18.7) | 5 (4.6) | 50 (46.3) | 16 (15.8) |
| Professional higher education (Level 2) | 10 (8.1) | 34 (31.5) | 9 (8.3) | 26 (25.7) |
| Master’s degree | 13 (10.6) | 31 (28.7) | 13 (12) | 34 (33.7) |
| Doctoral degree | 0 | 2 (1.9) | 0 | 1 (1) |
| Total | 126 | 125 | 116 | 101 |
| 1.4. Work Experience (in years) | | | | |
| No experience | 15 (12.2) | 11 (10.2) | 4 (3.7) | 5 (5) |
| Less than one year | 11 (8.9) | 21 (19.4) | 6 (5.6) | 8 (7.9) |
| 1 - 2 years | 14 (11.4) | 15 (13.9) | 8 (7.4) | 4 (4) |
| 3 - 5 years | 9 (7.3) | 15 (13.9) | 16 (14.8) | 6 (5.9) |
| 6 - 10 years | 14 (11.4) | 16 (14.8) | 11 (10.2) | 8 (7.9) |
| More than 10 years | 60 (48.8) | 31 (28.7) | 64 (59.3) | 71 (70.3) |
| Total | 123 | 109 | 109 | 102 |
| 1.5. Work Location | | | | |
| In a metropolitan area | 42 (34.1) | 84 (77.8) | 28 (29.5) | 22 (21.8) |
| In a small town | 19 (15.4) | 13 (12) | 59 (54.6) | 48 (47.5) |
| In a rural area | 55 (44.7) | 18 (16.7) | 21 (19.4) | 26 (25.7) |
| Not applicable | 14 (11.4) | 5 (4.6) | 3 (2.8) | 7 (6.9) |
| Total | 130 | 120 | 111 | 103 |
| 1.6. How do you evaluate the preschool educational institution in which you work regarding the implementation of inclusive education practices? | | | | |
| Inclusive (the institution implements special education programs) | 92 (75.4) | 78 (75) | 76 (70.4) | 87 (87) |
| Non-inclusive (the institution does not implement special education programs) | 19 (15.6) | 19 (18.3) | 23 (21.3) | 6 (6) |
| Not applicable | 11 (9) | 8 (7.7) | 10 (9.3) | 8 (8) |
| Total | 122 | 105 | 109 | 101 |
| 1.7. Child Age Range with Whom You Work Daily: | | | | |
| 0 - 12 months | 4 (3.3) | - | - | 4 (4) |
| 1 - 3 years | 21 (17.1) | 22 (21.2) | 14 (13.1) | 9 (9) |
| 3 - 5 years | 74 (60.2) | 55 (52.9) | 35 (32.7) | 75 (75) |
| 6 - 8 years | 31 (25.2) | 22 (21.2) | 35 (32.7) | 8 (8) |
| Mixed age groups | 11 (8.9) | 33 (31.7) | 28 (26.2) | 13 (13) |
| Not applicable | 6 (4.9) | 5 (4.8) | 7 (6.5) | 5 (5) |
| Total | 143 | 137 | 119 | 114 |
| 1.8. How many children are currently enrolled in your preschool education group? | | | | |
| 1 - 5 children | 3 (2.4) | 1 (1) | 1 (0.9) | 2 (2) |
| 6 - 10 children | 5 (4.1) | 4 (3.9) | 3 (2.8) | 5 (5) |
| 11 - 15 children | 11 (8.9) | 19 (18.4) | 16 (15) | 14 (14) |
| 16 - 20 children | 28 (22.8) | 24 (23.3) | 44 (41.5) | 35 (35) |
| 21 - 25 children | 61 (49.6) | 50 (48.5) | 23 (21.5) | 31 (31) |
| 26 or more children | 3 (2.4) | 5 (4.9) | 12 (11.2) | 2 (2) |
| Not applicable | 15 (12.2) | 2 (1.9) | 9 (8.4) | 11 (11) |
| Total | 126 | 105 | 108 | 100 |
| 1.9. How many teachers, teacher helpers, or assistants work in your group on a daily basis? | | | | |
| 1 - 2 | 40 (32.5) | 66 (64.1) | 58 (53.7) | 66 (66.7) |
| 2 - 4 | 60 (50.4) | 36 (35) | 39 (36.1) | 20 (20.2) |
| 5 or more | 10 (8.1) | 1 (1) | 5 (4.6) | 4 (4) |
| Not applicable | 14 (11.4) | 3 (2.9) | 6 (5.6) | 9 (9.1) |
| Total | 124 | 106 | 108 | 99 |
| 1.10. How many children in your group are enrolled in a special education program? | | | | |
| None | 34 (27.6) | 23 (22.8) | 53 (49.1) | 20 (20) |
| 1 - 2 children | 44 (35.8) | 51 (50.5) | 24 (22.2) | 44 (44) |
| 3 - 5 children | 25 (20.3) | 21 (20.8) | 11 (10.2) | 16 (16) |
| More than 5 children | 10 (8.1) | 4 (4) | 12 (11.1) | 8 (8) |
| Not applicable | 12 (9.8) | 2 (2) | 8 (7.4) | 13 (13) |
| Total | 125 | 103 | 108 | 101 |

*Supplementary Table S3*

|  |  | Austria | Czech Republic | Latvia | Portugal | H | p |
| --- | --- | --- | --- | --- | --- | --- | --- |
| Q_2_1 | Mean | 3.31 | 3.05 | 3.17 | 3.42 | 27.359 | <.000 |
|  | Median | 3.25 | 3.00 | 3.00 | 3.50 |  |  |
|  | SD | 0.55 | 0.54 | 0.49 | 0.50 |  |  |
| Q_2_2 | Mean | 3.23 | 3.12 | 3.21 | 3.49 | 30.855 | <.000 |
|  | Median | 3.20 | 3.10 | 3.20 | 3.40 |  |  |
|  | SD | 0.47 | 0.45 | 0.45 | 0.46 |  |  |
| Q_2_3 | Mean | 3.00 | 2.77 | 2.89 | 3.37 | 54.195 | <.000 |
|  | Median | 3.00 | 2.75 | 2.88 | 3.50 |  |  |
|  | SD | 0.58 | 0.59 | 0.53 | 0.52 |  |  |
| Q_3.1. | Mean | 2.54 | 2.57 | 2.84 | 3.27 | 51.020 | <.000 |
|  | Median | 2.67 | 2.67 | 2.83 | 3.33 |  |  |
|  | SD | 0.70 | 0.62 | 0.63 | 0.82 |  |  |
| Q_3.2. | Mean | 2.69 | 2.36 | 2.57 | 3.25 | 71.982 | <.000 |
|  | Median | 2.80 | 2.40 | 2.60 | 3.40 |  |  |
|  | SD | 0.58 | 0.63 | 0.56 | 0.69 |  |  |
| Q_3.3. | Mean | 3.03 | 2.95 | 3.01 | 3.49 | 51.873 | <.000 |
|  | Median | 3.00 | 3.00 | 3.00 | 3.50 |  |  |
|  | SD | 0.64 | 0.52 | 0.50 | 0.56 |  |  |
| Q_4.1. | Mean | 3.11 | 2.48 | 2.45 | 3.05 | 51.507 | <.000 |
|  | Median | 3.00 | 2.50 | 2.50 | 3.00 |  |  |
|  | SD | 0.72 | 0.67 | 0.68 | 0.89 |  |  |
| Q_4.2. | Mean | 3.25 | 2.81 | 3.03 | 3.44 | 62.461 | <.000 |
|  | Median | 3.25 | 2.75 | 3.00 | 3.50 |  |  |
|  | SD | 0.55 | 0.52 | 0.56 | 0.59 |  |  |
| Q_4.3. | Mean | 2.61 | 2.69 | 2.74 | 3.35 | 74.112 | <.000 |
|  | Median | 2.60 | 2.80 | 2.80 | 3.40 |  |  |
|  | SD | 0.59 | 0.60 | 0.55 | 0.61 |  |  |

*Supplementary Table S4*

|  |  | Austria | Czech Republic | Latvia | Portugal | H | p |
| --- | --- | --- | --- | --- | --- | --- | --- |
| Q_2_1 | Mean | 3.13 | 3.35 | 3.25 | 3.25 | 2.318 | .509 |
|  | Median | 3.25 | 3.50 | 3.38 | 3.25 |  |  |
|  | SD | 0.59 | 0.54 | 0.63 | 0.57 |  |  |
| Q_2_2 | Mean | 3.10 | 3.49 | 3.28 | 3.32 | 6.964 | .073 |
|  | Median | 3.20 | 3.40 | 3.50 | 3.30 |  |  |
|  | SD | 0.59 | 0.38 | 0.58 | 0.63 |  |  |
| Q_2_3 | Mean | 2.87 | 3.15 | 3.03 | 3.13 | 5.048 | .168 |
|  | Median | 2.88 | 3.13 | 3.00 | 3.00 |  |  |
|  | SD | 0.59 | 0.45 | 0.56 | 0.57 |  |  |
| Q_3.1. | Mean | 2.75 | 2.90 | 3.00 | 3.07 | 2.176 | .537 |
|  | Median | 2.67 | 2.83 | 3.00 | 3.00 |  |  |
|  | SD | 0.66 | 0.69 | 0.53 | 0.54 |  |  |
| Q_3.2. | Mean | 2.84 | 2.77 | 2.60 | 3.36 | 8.646 | .034 |
|  | Median | 3.00 | 2.60 | 2.60 | 3.20 |  |  |
|  | SD | 0.62 | 0.61 | 0.34 | 0.65 |  |  |
| Q_3.3. | Mean | 3.01 | 3.07 | 2.84 | 3.38 | 3.775 | .287 |
|  | Median | 3.00 | 3.00 | 2.75 | 3.38 |  |  |
|  | SD | 0.72 | 0.57 | 0.68 | 0.66 |  |  |
| Q_4.1. | Mean | 3.03 | 3.18 | 2.69 | 3.35 | 4.366 | .225 |
|  | Median | 3.00 | 3.00 | 3.00 | 3.25 |  |  |
|  | SD | 0.57 | 0.51 | 0.80 | 0.67 |  |  |
| Q_4.2. | Mean | 3.07 | 3.19 | 2.94 | 3.10 | 0.628 | .890 |
|  | Median | 3.00 | 3.13 | 3.13 | 3.00 |  |  |
|  | SD | 0.61 | 0.41 | 0.64 | 0.61 |  |  |
| Q_4.3. | Mean | 2.77 | 3.07 | 2.88 | 3.22 | 5.881 | .118 |
|  | Median | 2.80 | 2.90 | 3.00 | 3.20 |  |  |
|  | SD | 0.57 | 0.61 | 0.61 | 0.59 |  |  |

*Supplementary Table S5*

|  |  | Before |  | After |  |  |  |
| --- | --- | --- | --- | --- | --- | --- | --- |
|  | N | Mean | SD | Mean | SD | Z | p |
| Austria | 87 | 0.94 | 0.14 | 0.73 | 0.15 | -7.329b | <.000 |
| Czech Republic | 80 | 0.90 | 0.18 | 0.66 | 0.14 | -6.728b | <.000 |
| Latvia | 100 | 0.91 | 0.14 | 0.70 | 0.14 | -8.276b | <.000 |
| Portugal | 91 | 0.79 | 0.26 | 0.81 | 0.13 | -0.137b | .891 |

*Supplementary Table S6*

|  |  | Before |  | After |  |  |  |
| --- | --- | --- | --- | --- | --- | --- | --- |
|  | N | Mean | SD | Mean | SD | Z | p |
| Austria | 87 | 0.86 | 0.21 | 0.59 | 0.18 | -7.005b | <.000 |
| Czech Republic | 80 | 0.83 | 0.22 | 0.54 | 0.16 | -6.691b | <.000 |
| Latvia | 100 | 0.86 | 0.19 | 0.60 | 0.16 | -7.817b | <.000 |
| Portugal | 91 | 0.80 | 0.25 | 0.78 | 0.19 | -1.394b | .163 |

*Supplementary Table S7*

|  |  | Before |  | After |  |  |  |
| --- | --- | --- | --- | --- | --- | --- | --- |
|  | N | Mean | SD | Mean | SD | Z | p |
| Austria | 87 | 0.77 | 0.23 | 0.66 | 0.16 | -3.946b | <.000 |
| Czech Republic | 80 | 0.80 | 0.21 | 0.55 | 0.17 | -6.389b | <.000 |
| Latvia | 100 | 0.87 | 0.17 | 0.58 | 0.16 | -8.203b | <.000 |
| Portugal | 91 | 0.79 | 0.25 | 0.76 | 0.19 | -1.778b | .075 |

*Supplementary Table S8*

|  |  | Before |  | After |  |  |  |
| --- | --- | --- | --- | --- | --- | --- | --- |
|  |  | Mean | SD | Mean | SD | Z | p |
| Austria | 36 | 0.89 | 0.19 | 0.68 | 0.17 | -4.572b | <.000 |
| Czech Republic | 28 | 0.95 | 0.10 | 0.78 | 0.43 | -4.031b | <.000 |
| Latvia | 8 | 0.94 | 0.12 | 0.73 | 0.19 | -2.521b | .012 |
| Portugal | 10 | 0.83 | 0.21 | 0.74 | 0.19 | -1.126b | .260 |

*Supplementary Table S9*

|  |  | Before |  | After |  |  |  |
| --- | --- | --- | --- | --- | --- | --- | --- |
|  |  | Mean | SD | Mean | SD | Z | p |
| Austria | 36 | 0.79 | 0.23 | 0.62 | 0.18 | -3.291b | .001 |
| Czech Republic | 28 | 0.88 | 0.14 | 0.64 | 0.37 | -3.962b | <.000 |
| Latvia | 8 | 0.91 | 0.13 | 0.60 | 0.12 | -2.380b | .017 |
| Portugal | 10 | 0.80 | 0.20 | 0.76 | 0.19 | -0.561b | .575 |

*Supplementary Table S10*

|  |  | Before |  | After |  |  |  |
| --- | --- | --- | --- | --- | --- | --- | --- |
|  |  | Mean | SD | Mean | SD | Z | p |
| Austria | 36 | 0.78 | 0.19 | 0.65 | 0.16 | -3.138b | .002 |
| Czech Republic | 28 | 0.88 | 0.16 | 0.72 | 0.47 | -3.988b | <.000 |
| Latvia | 8 | 0.94 | 0.12 | 0.61 | 0.18 | -2.521b | .012 |
| Portugal | 10 | 0.83 | 0.17 | 0.74 | 0.20 | -1.174b | .241 |

Supplementary Table S11

| Q5.1. | | | N | | Mean | | SD | | Mean Rank | | Kruskal-Wallis H | | P | |
| --- | --- | --- | --- | --- | --- | --- | --- | --- | --- | --- | --- | --- | --- | --- |
| UDL1  (Engagement) | 1 | 223 | | 3.15 | | 0.47 | | 347.76 | | 10.423 | | .034 | |  |
| 2 | 122 | | 3.07 | | 0.46 | | 310.13 | |  |
| 3 | 247 | | 3.14 | | 0.42 | | 337.50 | |  |
| 4 | 79 | | 3.26 | | 0.45 | | 400.87 | |  |
| 5 | 15 | | 3.20 | | 0.42 | | 348.23 | |  |
| UDL2  (Representation) | 1 | 223 | | 2.88 | | 0.62 | | 353.04 | | 16.986 | | .002 | |  |
| 2 | 122 | | 2.70 | | 0.52 | | 290.19 | |  |
| 3 | 247 | | 2.82 | | 0.54 | | 339.99 | |  |
| 4 | 79 | | 3.02 | | 0.60 | | 402.30 | |  |
| 5 | 15 | | 2.94 | | 0.60 | | 383.40 | |  |
| UDL3  (Action & Expression) | 1 | 223 | | 2.91 | | 0.58 | | 348.52 | | 16.265 | | .003 | |  |
| 2 | 122 | | 2.74 | | 0.50 | | 286.34 | |  |
| 3 | 247 | | 2.89 | | 0.52 | | 349.46 | |  |
| 4 | 79 | | 3.02 | | 0.62 | | 396.67 | |  |
| 5 | 15 | | 2.91 | | 0.35 | | 355.67 | |  |
|  |  |  |  |  |  |  |  |  |  |  |  |  |  |  |

**Note: Challenge codes correspond to: 1 = Lack of resources; 2 = Limited knowledge/training; 3 = Time constraints; 4 = Resistance from colleagues/institution; 5 = Other*

Supplementary Table S12

| Q5.2. | | | N | | Mean Rank | | Mean | | SD | | Kruskal-Wallis H | | Asymp. Sig. | |
| --- | --- | --- | --- | --- | --- | --- | --- | --- | --- | --- | --- | --- | --- | --- |
| UDL1  (Engagement) | 1 | 172 | | 426.83 | | 3.16 | | 0.45 | | 16.568 | | 0.005 | |  |
| 2 | 195 | | 414.61 | | 3.14 | | 0.43 | |  |
| 3 | 213 | | 438.87 | | 3.17 | | 0.43 | |  |
| 4 | 224 | | 430.90 | | 3.17 | | 0.37 | |  |
| 5 | 13 | | 233.92 | | 2.80 | | 0.50 | |  |
| 6 | 43 | | 533.14 | | 3.34 | | 0.45 | |  |
| UDL2  (Representation) | 1 | 172 | | 453.42 | | 2.93 | | 0.54 | | 6.043 | | 0.302 | |  |
| 2 | 195 | | 433.66 | | 2.87 | | 0.54 | |  |
| 3 | 213 | | 417.58 | | 2.85 | | 0.54 | |  |
| 4 | 224 | | 427.75 | | 2.86 | | 0.51 | |  |
| 5 | 13 | | 295.77 | | 2.58 | | 0.66 | |  |
| 6 | 43 | | 443.55 | | 2.95 | | 0.50 | |  |
| UDL3  (Action & Expression) | 1 | 172 | | 431.19 | | 2.93 | | 0.55 | | 7.640 | | 0.177 | |  |
| 2 | 195 | | 427.29 | | 2.91 | | 0.55 | |  |
| 3 | 213 | | 425.93 | | 2.90 | | 0.52 | |  |
| 4 | 224 | | 437.81 | | 2.92 | | 0.48 | |  |
| 5 | 13 | | 264.23 | | 2.53 | | 0.67 | |  |
| 6 | 43 | | 477.09 | | 3.03 | | 0.50 | |  |
|  |  |  |  |  |  |  |  |  |  |  |  |  |  |  |

**Note: Support codes correspond to: 1 = Knowledge from study programs; 2 = Formal courses/diplomas; 3 = Self-directed learning; 4 = Collaboration with colleagues/staff; 5 = No relevant knowledge; 6 = Other*
