# Supplementary material
Source: Research Square preprint supplement (doi:10.21203/rs.3.rs-9452587/v1)
Supplement: Supplementary file 6 [file 7ccb8263fde815428771ed30.pdf]

# Anketa par iekļaujošas izglītības nodrošināšanu, izmantojot Universālā Mācību Dizaina (UMD) principus

Paldies, ka piekrītat piedalīties šajā pētījumā. Lūdzam Jūs rūpīgi iepazīties ar pētījuma mērķi. Aizpildot šo anketu, Jūs apliecināt, ka esat informēts par anketēšanas mērķi un ka brīvprātīgi piekrītat tās aizpildei.

*Lūdzu, ņemiet vērā, ka, ja Jūs pašreiz nestrādājat pirmsskolas izglītībā kā praktizējošs pedagogs vai nestudējat pirmsskolas pedagoģijas programmās, aicinām atturēties no šīs anketas aizpildīšanas.*

**Mūsu mērķis** ir izprast, kā Universālā Mācību Dizaina (UMD) principi tiek pielietoti iekļaujošas izglītības vides veicināšanai. Pētījuma mērķis ir novērtēt iekļaujošas pirmsskolas izglītības kvalitāti Austrijā, Čehijā, Latvijā un Portugālē, balstoties uz UMD principiem un mērot pedagogu izpratni par efektīvām praksēm. Jūsu sniegtās atbildes būs anonīmas, un mēs neveiksim nekādu personiskas informācijas apkopošanu, kas varētu jūs identificēt. Apkopotā informācija tiks izmantota tikai pētniecībā un tiks apvienota ar citu respondentu atbildēm. Aptaujas aizpildīšanai vajadzētu aizņemt apmēram 10-20 minūtes laika. Jūsu sniegtās atbildes mums ir ļoti svarīgas un palīdzēs uzlabot mācību pieredzi pirmsskolas vecuma bērniem.

**\*Norāda nepieciešamo jautājumu**

## 1. Demogrāfiskie dati

### 1. 1.1. Valsts \*

*Atzīmējiet visus atbilstošos variantus.*

- Austrija
- Čehija
- Latvija
- Portugāle
- Cits

## 2. 1.2. Dzimums \*

*Atzīmējiet visus atbilstošos variantus.*

- Sieviete
- Vīrietis
- Neatbildēt

## 3. 1.3. Kāds ir jūsu augstākais akadēmiskās kvalifikācijas līmenis? \*

*Atzīmējiet visus atbilstošos variantus.*

- Pašlaik iegūst kvalifikāciju
- Profesionālā augstākā izglītība (1. līmenis)
- Bakalaura grāds
- Profesionālā augstākā izglītība (2. līmenis)
- Maģistra grāds
- Doktora grāds

## 4. 1.4. Darba pieredze (gadi): \*

*Atzīmējiet visus atbilstošos variantus.*

- Nav pieredzes
- Mazāk par vienu gadu
- 1 - 2 gadi
- 3 - 5 gadi
- 6 - 10 gadi
- Vairāk nekā 10 gadi

## 5. 1.5. Darba atrašanās vieta: \*

*Atzīmējiet visus atbilstošos variantus.*

- Lielpilsētā
- Mazpilsētā
- Lauku apvidū
- Nav attiecināms

6. 1.6. Kā jūs vērtējat pirmsskolas izglītības iestādi, kurā strādājat, attiecībā uz iekļaujošas izglītības prakses īstenošanu?

*Atzīmējiet visus atbilstošos variantus.*

- Iekļaujoša (izglītības iestādē tiek īstenotas speciālās izglītības programmas)  
 Neiekļaujoša (izglītības iestādē netiek īstenotas speciālās izglītības programmas)  
 Nav attiecināms

7. 1.7. Bērnu vecums, ar kuriem Jūs ikdienā strādājat:

*Atzīmējiet visus atbilstošos variantus.*

- 0 - 12 mēneši  
 1 - 3 gadi  
 3 - 5 gadi  
 6 - 8 gadi  
 Jaukti vecumi  
 Nav attiecināms

8. 1.8. Cik bērnu šobrīd iegūst izglītību Jūsu pirmsskolas izglītības iestādes grupā?

*Atzīmējiet visus atbilstošos variantus.*

- 1 - 5 bērni  
 6 - 10 bērni  
 11 - 15 bērni  
 16 - 20 bērni  
 21 - 25 bērni  
 26 un vairāk bērni  
 Nav attiecināms

## 9. 1.9. Cik skolotāju, skolotāju palīgu vai asistentu katru dienu strādā Jūsu grupā?

*Atzīmējiet visus atbilstošos variantus.*

- 1 - 2
- 2 - 4
- 5 un vairāk
- Nav attiecināms

## 10. 1.10. Cik bērniem Jūsu grupā tiek īstenota speciālās izglītības programma?

*Atzīmējiet visus atbilstošos variantus.*

- Nevienam
- 1 - 2 bērniem
- 3 - 5 bērniem
- Vairāk nekā 5 bērniem
- Nav attiecināms

## 11. 1.11. Lūdzu, novērtējiet, cik svarīgi, Jūsaprāt, ir šādi UMD principos balstīti aspekti iekļaujošas mācību vides veicināšanai:

*Atzīmējiet visus atbilstošos variantus.*

|                                                                   | Nav svarīgi              | Drīzāk nav svarīgi       | Neitrāli / nav viedokļa  | Drīzāk svarīgi           | Ļoti svarīgi             |
|-------------------------------------------------------------------|--------------------------|--------------------------|--------------------------|--------------------------|--------------------------|
| <b>Bērnu iesaistīšana aktivitātēs, izmantojot dažādas metodes</b> | <input type="checkbox"/> |
| <b>Informācijas prezentēšana, izmantojot dažādus materiālus</b>   | <input type="checkbox"/> |
| <b>Apgūto zināšanu paušana un novērtēšana dažādos veidos</b>      | <input type="checkbox"/> |

12. 1.12. Lai atbildētu uz turpmākās sadaļas jautājumiem un novērtētu UMD principos ietvertās mācību metodes un stratēģijas, lūdzu norādiet savu šī brīža kvalifikāciju:

*Atzīmējiet tikai vienu variantu.*

- Pedagogs *Pārejiet uz 13. jautājumu*
- Students *Pārejiet uz 24. jautājumu*
- Studējošs pedagogs *Pārejiet uz 13. jautājumu*

### UMD principu novērtējums pedagogiem

#### 2. Dažādu iesaistes veidu izmantošana

Lūdzu, novērtējiet, cik bieži izmantojat šādus iesaistes veidus pirmsskolas izglītības vidē:

## 13. 2.1. Interesu un identitāšu pieņemšana

*Atzīmējiet visus atbilstošos variantus.*

|                                                                                                                                                                                                                                                | Nekad                    | Dažreiz                  | Bieži                    | Vienmēr                  |
|------------------------------------------------------------------------------------------------------------------------------------------------------------------------------------------------------------------------------------------------|--------------------------|--------------------------|--------------------------|--------------------------|
| <b>2.1.1. Mācību mērķu un uzdevumu izvēle balstoties uz bērnu unikālajām interesēm, kultūras kontekstu, dzimumu, vecumposmu un spējām (piemēram, izvēles došana par galarezultāta atainošanu zīmējumā, skulptūrā, video vai audio formātā)</b> | <input type="checkbox"/> | <input type="checkbox"/> | <input type="checkbox"/> | <input type="checkbox"/> |
| <b>2.1.2. Uz rotaļām un praktiskām darbībām balstītas aktivitātes (piemēram, lomu spēles un ekskursijas dažādās vidēs – iekštelpās un dabā)</b>                                                                                                | <input type="checkbox"/> | <input type="checkbox"/> | <input type="checkbox"/> | <input type="checkbox"/> |
| <b>2.1.3. Prieka veicināšana veiktajās aktivitātēs un uzdevumos (piemēram, izmantojot pārsteigumus vai atklājumus aktivitāšu laikā)</b>                                                                                                        | <input type="checkbox"/> | <input type="checkbox"/> | <input type="checkbox"/> | <input type="checkbox"/> |
| <b>2.1.4. Vides izveide, kurā tiek apzinātas dažādas bērna emocionālās un sensorās vajadzības (piemēram, dažādu ideju un jautājumu pētīšana un skaņu slāpējošu austiņu vai pielāgota apgaismojuma nodrošināšana)</b>                           | <input type="checkbox"/> | <input type="checkbox"/> | <input type="checkbox"/> | <input type="checkbox"/> |

## 14. 2.2. Noturīgas pūles un neatlaidība

*Atzīmējiet visus atbilstošos variantus.*

|                                                                                                                                                                   | Nekad                    | Dažreiz                  | Bieži                    | Vienmēr                  |
|-------------------------------------------------------------------------------------------------------------------------------------------------------------------|--------------------------|--------------------------|--------------------------|--------------------------|
| <b>2.2.1. Aktivitāšu mērķa izskaidrošana (piemēram, pastāstiet bērniem, kāpēc viņi mācās par dalīšanos, izmantojot galda un lomu spēles)</b>                      | <input type="checkbox"/> | <input type="checkbox"/> | <input type="checkbox"/> | <input type="checkbox"/> |
| <b>2.2.2. Dažādu izaicinājumu līmeņu nodrošināšana (piemēram, dažādu grūtību un apjoma uzdevumu piedāvāšana dažādiem prasmiņu līmeņiem)</b>                       | <input type="checkbox"/> | <input type="checkbox"/> | <input type="checkbox"/> | <input type="checkbox"/> |
| <b>2.2.3. Komandas darba veicināšana (piemēram, liekot bērniem kopīgi strādāt pie projektiem vai uzdevumiem)</b>                                                  | <input type="checkbox"/> | <input type="checkbox"/> | <input type="checkbox"/> | <input type="checkbox"/> |
| <b>2.2.4. Kopības sajūtas veidošana (piemēram, dalīšanās pieredzē par apgūstamās tēmas konceptiem)</b>                                                            | <input type="checkbox"/> | <input type="checkbox"/> | <input type="checkbox"/> | <input type="checkbox"/> |
| <b>2.2.5. Konkrētas, praktiskas atgriezeniskās saites sniegšana (piemēram, sakot bērnam: "Man patīk, kā jūs dalījāties ar savām rotallietām ar savu draugu!")</b> | <input type="checkbox"/> | <input type="checkbox"/> | <input type="checkbox"/> | <input type="checkbox"/> |

## 15. 2.3. Emocionālās spējas

*Atzīmējiet visus atbilstošos variantus.*

|                                                                                                                                                                                          | Nekad                    | Dažreiz                  | Bieži                    | Vienmēr                  |
|------------------------------------------------------------------------------------------------------------------------------------------------------------------------------------------|--------------------------|--------------------------|--------------------------|--------------------------|
| <b>2.3.1. Bēnu gaidu apzināšanās un motivācijas veicināšana aktivitātēs (piemēram, noskaidrot, ko varēs izlasīt, kad apgūs lasītprasmi vai kāds būs apbalvojums par veikto uzdevumu)</b> | <input type="checkbox"/> | <input type="checkbox"/> | <input type="checkbox"/> | <input type="checkbox"/> |
| <b>2.3.2. Emociju paušanas un pašregulācijas spēju attīstīšana (piemēram, emociju paušana, izmantojot emocijzīmes vai uzvedības reakciju apguve lomu spēlēs)</b>                         | <input type="checkbox"/> | <input type="checkbox"/> | <input type="checkbox"/> | <input type="checkbox"/> |
| <b>2.3.3. Savu sniegumu un progresu izvērtēšana (piemēram, veidot diagrammas ar apgūto burtu vai piktogrammu skaitu noteiktā periodā)</b>                                                | <input type="checkbox"/> | <input type="checkbox"/> | <input type="checkbox"/> | <input type="checkbox"/> |
| <b>2.3.4. Empātijas modelēšana, izmantojot diskusijas vai lomu spēles (piemēram, izmantojot diskusijas vai lomu spēles)</b>                                                              | <input type="checkbox"/> | <input type="checkbox"/> | <input type="checkbox"/> | <input type="checkbox"/> |

## 3. Dažādu reprezentācijas līdzekļu izmantošana

Lūdzu, novērtējiet, cik bieži izmantojat šādus reprezentācijas līdzekļus pirmsskolas izglītības vidē:

## 16. 3.1. Uztvere

*Atzīmējiet visus atbilstošos variantus.*

|                                                                                                                                               | Nekad                    | Dažreiz                  | Bieži                    | Vienmēr                  |
|-----------------------------------------------------------------------------------------------------------------------------------------------|--------------------------|--------------------------|--------------------------|--------------------------|
| <b>3.1.1. Informācijas attēlošanas pielāgošana (piemēram, digitālie rīki ar burtu lieluma un krāsu kontrasta pielāgošana)</b>                 | <input type="checkbox"/> | <input type="checkbox"/> | <input type="checkbox"/> | <input type="checkbox"/> |
| <b>3.1.2. Informācijas sniegšana, izmantojot dažādus formātus (piemēram, izmantojot videoklipus, audio materiālus un kustību aktivitātes)</b> | <input type="checkbox"/> | <input type="checkbox"/> | <input type="checkbox"/> | <input type="checkbox"/> |
| <b>3.1.3. Temata attēlošana autentiskā veidā (piemēram, dažādu stāstu stāstīšana par dažādām valodām un kultūrām vēsturiskā formātā)</b>      | <input type="checkbox"/> | <input type="checkbox"/> | <input type="checkbox"/> | <input type="checkbox"/> |

## 17. 3.2. Valoda un simboli

*Atzīmējiet visus atbilstošos variantus.*

|                                                                                                                                                                        | Nekad                    | Dažreiz                  | Bieži                    | Vienmēr                  |
|------------------------------------------------------------------------------------------------------------------------------------------------------------------------|--------------------------|--------------------------|--------------------------|--------------------------|
| <b>3.2.1. Izpratnes veicināšana par vārdiem, simboliem un skaitļiem dažādos formātos (piemēram, grafiku un diagrammu veidošana)</b>                                    | <input type="checkbox"/> | <input type="checkbox"/> | <input type="checkbox"/> | <input type="checkbox"/> |
| <b>3.2.2. Izpratnes veicināšana par simboliem un skaitļiem praktiskā darbībā</b>                                                                                       | <input type="checkbox"/> | <input type="checkbox"/> | <input type="checkbox"/> | <input type="checkbox"/> |
| <b>3.2.3. Konceptu atspoguļošana, izmantojot dažādas kultūras, valodas un dialektus (piemēram, jēdzienu skaidrošana dažādās valodās un simbolos)</b>                   | <input type="checkbox"/> | <input type="checkbox"/> | <input type="checkbox"/> | <input type="checkbox"/> |
| <b>3.2.4. Aizspriedumu novēršana par dažādām valodām un komunikācijas līdzekļiem (piemēram, simbolu un izteiksmes līdzekļu, vārdu un frāžu apguve dažādās valodās)</b> | <input type="checkbox"/> | <input type="checkbox"/> | <input type="checkbox"/> | <input type="checkbox"/> |
| <b>3.2.5. Temata attēlošana, izmantojot dažādus reprezentācijas veidus (piemēram, ar video, grafikiem un interaktīvām aktivitātēm)</b>                                 | <input type="checkbox"/> | <input type="checkbox"/> | <input type="checkbox"/> | <input type="checkbox"/> |

## 18. 3.3. Zināšanu veidošana

*Atzīmējiet visus atbilstošos variantus.*

|                                                                                                                                                       | Nekad                    | Dažreiz                  | Bieži                    | Vienmēr                  |
|-------------------------------------------------------------------------------------------------------------------------------------------------------|--------------------------|--------------------------|--------------------------|--------------------------|
| <b>3.3.1. Esošo un apgūstamo zināšanu sasaiste (piemēram, esošo zināšanu par dzīvām radībām sasaiste ar konkrētām ekosistēmām)</b>                    | <input type="checkbox"/> | <input type="checkbox"/> | <input type="checkbox"/> | <input type="checkbox"/> |
| <b>3.3.2. Būtiskāko jēdzienu un sakarību salīdzināšana (piemēram, dzīvnieku raksturīgo pazīmju salīdzināšana)</b>                                     | <input type="checkbox"/> | <input type="checkbox"/> | <input type="checkbox"/> | <input type="checkbox"/> |
| <b>3.3.3. Daudzveidīgu interešu un identitāšu apzināšana (piemēram, zīmējot dažādus karogus vai salīdzinot dažādas acu/matņu krāsas)</b>              | <input type="checkbox"/> | <input type="checkbox"/> | <input type="checkbox"/> | <input type="checkbox"/> |
| <b>3.3.4. Tematu sasaiste un jēdzienu vispārināšana (piemēram, ceļa zīmju apguve pastaigu laikā vai dažādu sugu, krāsu un izmēra suņu iepazīšana)</b> | <input type="checkbox"/> | <input type="checkbox"/> | <input type="checkbox"/> | <input type="checkbox"/> |

## 4. Dažādu darbības un izteiksmes līdzekļu izmantošana

Lūdzu, novērtējiet, cik bieži izmantojat šādus darbības un izteiksmes līdzekļus pirmsskolas izglītības vidē

## 19. 4.1. Mijiedarbība

*Atzīmējiet visus atbilstošos variantus.*

|                                                                                                                                                                               | Nekad                    | Dažreiz                  | Bieži                    | Vienmēr                  |
|-------------------------------------------------------------------------------------------------------------------------------------------------------------------------------|--------------------------|--------------------------|--------------------------|--------------------------|
| <b>4.1.1. Piekļuves un paredzamības nodrošināšana dažādām vidēm (piemēram, izmantot taktiskas, audiālas, simboliskas un krāsainas norādes bērna apkārtējā vidē)</b>           | <input type="checkbox"/> | <input type="checkbox"/> | <input type="checkbox"/> | <input type="checkbox"/> |
| <b>4.1.2. Piekļuves nodrošināšana materiāliem un palīgriekiem (piemēram, izmantojot skaņu slāpējošas austiņas, dārznieka cimdsus un alternatīvās komunikācijas līdzekļus)</b> | <input type="checkbox"/> | <input type="checkbox"/> | <input type="checkbox"/> | <input type="checkbox"/> |

## 20. 4.2. Izteiksme un komunikācija

*Atzīmējiet visus atbilstošos variantus.*

|                                                                                                                                                  | Nekad                    | Dažreiz                  | Bieži                    | Vienmēr                  |
|--------------------------------------------------------------------------------------------------------------------------------------------------|--------------------------|--------------------------|--------------------------|--------------------------|
| <b>4.2.1. Dažādu saziņas līdzekļu izmantošana (piemēram, ļaujot bērniem paust idejas, izmantojot mākslu, mūziku vai kustību)</b>                 | <input type="checkbox"/> | <input type="checkbox"/> | <input type="checkbox"/> | <input type="checkbox"/> |
| <b>4.2.2. Dažādu materiālu nodrošināšana (piemēram, dažādu materiālu izmantošana uzdevumu veikšanā)</b>                                          | <input type="checkbox"/> | <input type="checkbox"/> | <input type="checkbox"/> | <input type="checkbox"/> |
| <b>4.2.3. Atbalsta sniegšana un pakāpeniska samazināšana (piemēram, izmantot verbālu un vizuālu fizisku atbalstu, kuru pakāpeniski samazina)</b> | <input type="checkbox"/> | <input type="checkbox"/> | <input type="checkbox"/> | <input type="checkbox"/> |
| <b>4.2.4. Dažādu runas un izteiksmes līdzekļu izmantošana (piemēram, dažādas valodas vai alternatīvās komunikācijas līdzekļi)</b>                | <input type="checkbox"/> | <input type="checkbox"/> | <input type="checkbox"/> | <input type="checkbox"/> |

## 21. 4.3. Stratēģiskās domāšanas attīstīšana

*Atzīmējiet visus atbilstošos variantus.*

|                                                                                                                                                                            | Nekad                    | Dažreiz                  | Bieži                    | Vienmēr                  |
|----------------------------------------------------------------------------------------------------------------------------------------------------------------------------|--------------------------|--------------------------|--------------------------|--------------------------|
| <b>4.3.1. Jēgpilnu mērķu izvirzīšana kopā ar bērniem (piemēram, izvirzot mērķus apgūt trīs dažādus jaunus vārdus nedēļa laikā, veicot dažādas aktivitātes)</b>             | <input type="checkbox"/> | <input type="checkbox"/> | <input type="checkbox"/> | <input type="checkbox"/> |
| <b>4.3.2. Aktivitāšu izaicinājumu paredzēšana (piemēram, bibliotēkas apmeklēšana un iespējamo grūtību paredzēšana ceļā vai bibliotēkā)</b>                                 | <input type="checkbox"/> | <input type="checkbox"/> | <input type="checkbox"/> | <input type="checkbox"/> |
| <b>4.3.3. Resursu un informācijas organizācija (piemēram, marķējumi uz materiāliem un mēbelēm)</b>                                                                         | <input type="checkbox"/> | <input type="checkbox"/> | <input type="checkbox"/> | <input type="checkbox"/> |
| <b>4.3.4. Sava progresu novērtēšana jeb pašrefleksija par apgūtajām prasmēm (piemēram, apgūtajiem konceptiem, burtiem un jēdzieniem izmantojot diagrammas vai tabulas)</b> | <input type="checkbox"/> | <input type="checkbox"/> | <input type="checkbox"/> | <input type="checkbox"/> |
| <b>4.3.5. Iekļaujošas prakses veicināšana (piemēram, iepazīstot dažādu kultūru svētkus vai tradīcijas)</b>                                                                 | <input type="checkbox"/> | <input type="checkbox"/> | <input type="checkbox"/> | <input type="checkbox"/> |

## 5. UMD principos ietvertu mācību metožu un stratēģiju izmantošanas iespējas

22. 5.1. Ar kādiem izaicinājumiem jūs saskaraties, mēģinot iekļaut dažādas iesaistīšanās, reprezentācijas vai darbības un izteiksmes stratēģijas un metodes?

*Atzīmējiet visus atbilstošos variantus.*

- Resursu trūkums
- Ierobežotas zināšanas vai apmācību iespējas
- Laika ierobežojums
- Pretestība no kolēģiem vai izglītības iestādes
- Citas: \_\_\_\_\_

23. 5.2. Kādas konkrētas profesionālās kompetences pilnveides iespējas vai atbalstu esat saņēmis saistībā ar UMD principos norādīto metožu un stratēģiju apguvi iekļaujošas izglītības prakses veicināšanai?

*Atzīmējiet visus atbilstošos variantus.*

- Zināšanas, kas iegūtas studiju ietvaros
- Formāla izglītība (kursi, diplomu) par profesionālās kompetences pilnveidi
- Patstāvīgi apgūtas zināšanas, izmantojot resursus, piemēram, grāmatas, tiešsaistes kursus vai pētījumus.
- Zināšanas, kas gūtas sadarbībā ar kolēģiem, atbalsta personālu vai citu nozaru profesionāļiem
- Atbilstošu zināšanu nav
- Citas: \_\_\_\_\_

## UMD principu novērtējums studentiem

### 2. Dažādu iesaistes veidu izmantošana

Lūdzu, novērtējiet, cik bieži būtu jāizmanto šādus iesaistes veidus pirmsskolas izglītības vidē:

## 24. 2.1. Interesu un identitāšu pieņemšana

*Atzīmējiet visus atbilstošos variantus.*

|                                                                                                                                                                                                                                                | Nekad                    | Dažreiz                  | Bieži                    | Vienmēr                  |
|------------------------------------------------------------------------------------------------------------------------------------------------------------------------------------------------------------------------------------------------|--------------------------|--------------------------|--------------------------|--------------------------|
| <b>2.1.1. Mācību mērķu un uzdevumu izvēle balstoties uz bērnu unikālajām interesēm, kultūras kontekstu, dzimumu, vecumposmu un spējām (piemēram, izvēles došana par galarezultāta atainošanu zīmējumā, skulptūrā, video vai audio formātā)</b> | <input type="checkbox"/> | <input type="checkbox"/> | <input type="checkbox"/> | <input type="checkbox"/> |
| <b>2.1.2. Uz rotaļām un praktiskām darbībām balstītas aktivitātes (piemēram, lomu spēles un ekskursijas dažādās vidēs – iekštelpās un dabā)</b>                                                                                                | <input type="checkbox"/> | <input type="checkbox"/> | <input type="checkbox"/> | <input type="checkbox"/> |
| <b>2.1.3. Prieka veicināšana veiktajās aktivitātēs un uzdevumos (piemēram, izmantojot pārsteigumus vai atklājumus aktivitāšu laikā)</b>                                                                                                        | <input type="checkbox"/> | <input type="checkbox"/> | <input type="checkbox"/> | <input type="checkbox"/> |
| <b>2.1.4. Vides izveide, kurā tiek apzinātas dažādas bērna emocionālās un sensorās vajadzības (piemēram, dažādu ideju un jautājumu pētīšana un skaņu slāpējošu austiņu vai pielāgota apgaismojuma nodrošināšana)</b>                           | <input type="checkbox"/> | <input type="checkbox"/> | <input type="checkbox"/> | <input type="checkbox"/> |

## 25. 2.2. Noturīgas pūles un neatlaidība

*Atzīmējiet visus atbilstošos variantus.*

|                                                                                                                                                                   | Nekad                    | Dažreiz                  | Bieži                    | Vienmēr                  |
|-------------------------------------------------------------------------------------------------------------------------------------------------------------------|--------------------------|--------------------------|--------------------------|--------------------------|
| <b>2.2.1. Aktivitāšu mērķa izskaidrošana (piemēram, pastāstiet bērniem, kāpēc viņi mācās par dalīšanos, izmantojot galda un lomu spēles)</b>                      | <input type="checkbox"/> | <input type="checkbox"/> | <input type="checkbox"/> | <input type="checkbox"/> |
| <b>2.2.2. Dažādu izaicinājumu līmeņu nodrošināšana (piemēram, dažādu grūtību un apjoma uzdevumu piedāvāšana dažādiem prasmiņu līmeņiem)</b>                       | <input type="checkbox"/> | <input type="checkbox"/> | <input type="checkbox"/> | <input type="checkbox"/> |
| <b>2.2.3. Komandas darba veicināšana (piemēram, liekot bērniem kopīgi strādāt pie projektiem vai uzdevumiem)</b>                                                  | <input type="checkbox"/> | <input type="checkbox"/> | <input type="checkbox"/> | <input type="checkbox"/> |
| <b>2.2.4. Kopības sajūtas veidošana (piemēram, dalīšanās pieredzē par apgūstamās tēmas konceptiem)</b>                                                            | <input type="checkbox"/> | <input type="checkbox"/> | <input type="checkbox"/> | <input type="checkbox"/> |
| <b>2.2.5. Konkrētas, praktiskas atgriezeniskās saites sniegšana (piemēram, sakot bērnam: "Man patīk, kā jūs dalījāties ar savām rotallietām ar savu draugu!")</b> | <input type="checkbox"/> | <input type="checkbox"/> | <input type="checkbox"/> | <input type="checkbox"/> |

## 26. 2.3. Emocionālās spējas

*Atzīmējiet visus atbilstošos variantus.*

|                                                                                                                                                                                          | Nekad                    | Dažreiz                  | Bieži                    | Vienmēr                  |
|------------------------------------------------------------------------------------------------------------------------------------------------------------------------------------------|--------------------------|--------------------------|--------------------------|--------------------------|
| <b>2.3.1. Bēnu gaidu apzināšanās un motivācijas veicināšana aktivitātēs (piemēram, noskaidrot, ko varēs izlasīt, kad apgūs lasītprasmi vai kāds būs apbalvojums par veikto uzdevumu)</b> | <input type="checkbox"/> | <input type="checkbox"/> | <input type="checkbox"/> | <input type="checkbox"/> |
| <b>2.3.2. Emociju paušanas un pašregulācijas spēju attīstīšana (piemēram, emociju paušana, izmantojot emocijzīmes vai uzvedības reakciju apguve lomu spēlēs)</b>                         | <input type="checkbox"/> | <input type="checkbox"/> | <input type="checkbox"/> | <input type="checkbox"/> |
| <b>2.3.3. Savu sniegumu un progresu izvērtēšana (piemēram, veidot diagrammas ar apgūto burtu vai piktogrammu skaitu noteiktā periodā)</b>                                                | <input type="checkbox"/> | <input type="checkbox"/> | <input type="checkbox"/> | <input type="checkbox"/> |
| <b>2.3.4. Empātijas modelēšana, izmantojot diskusijas vai lomu spēles (piemēram, izmantojot diskusijas vai lomu spēles)</b>                                                              | <input type="checkbox"/> | <input type="checkbox"/> | <input type="checkbox"/> | <input type="checkbox"/> |

## 3. Dažādu reprezentācijas līdzekļu izmantošana

Lūdzu, novērtējiet, cik bieži būtu jāizmanto šādus šādus reprezentācijas līdzekļus pirmsskolas izglītības vidē:

## 27. 3.1. Uztvere

*Atzīmējiet visus atbilstošos variantus.*

|                                                                                                                                               | Nekad                    | Dažreiz                  | Bieži                    | Vienmēr                  |
|-----------------------------------------------------------------------------------------------------------------------------------------------|--------------------------|--------------------------|--------------------------|--------------------------|
| <b>3.1.1. Informācijas attēlošanas pielāgošana (piemēram, digitālie rīki ar burtu lieluma un krāsu kontrasta pielāgošana)</b>                 | <input type="checkbox"/> | <input type="checkbox"/> | <input type="checkbox"/> | <input type="checkbox"/> |
| <b>3.1.2. Informācijas sniegšana, izmantojot dažādus formātus (piemēram, izmantojot videoklipus, audio materiālus un kustību aktivitātes)</b> | <input type="checkbox"/> | <input type="checkbox"/> | <input type="checkbox"/> | <input type="checkbox"/> |
| <b>3.1.3. Temata attēlošana autentiskā veidā (piemēram, dažādu stāstu stāstīšana par dažādām valodām un kultūrām vēsturiskā formātā)</b>      | <input type="checkbox"/> | <input type="checkbox"/> | <input type="checkbox"/> | <input type="checkbox"/> |

## 28. 3.2. Valoda un simboli

*Atzīmējiet visus atbilstošos variantus.*

|                                                                                                                                                                        | Nekad                    | Dažreiz                  | Bieži                    | Vienmēr                  |
|------------------------------------------------------------------------------------------------------------------------------------------------------------------------|--------------------------|--------------------------|--------------------------|--------------------------|
| <b>3.2.1. Izpratnes veicināšana par vārdiem, simboliem un skaitļiem dažādos formātos (piemēram, grafiku un diagrammu veidošana)</b>                                    | <input type="checkbox"/> | <input type="checkbox"/> | <input type="checkbox"/> | <input type="checkbox"/> |
| <b>3.2.2. Izpratnes veicināšana par simboliem un skaitļiem praktiskā darbībā</b>                                                                                       | <input type="checkbox"/> | <input type="checkbox"/> | <input type="checkbox"/> | <input type="checkbox"/> |
| <b>3.2.3. Konceptu atspoguļošana, izmantojot dažādas kultūras, valodas un dialektus (piemēram, jēdzienu skaidrošana dažādās valodās un simbolos)</b>                   | <input type="checkbox"/> | <input type="checkbox"/> | <input type="checkbox"/> | <input type="checkbox"/> |
| <b>3.2.4. Aizspriedumu novēršana par dažādām valodām un komunikācijas līdzekļiem (piemēram, simbolu un izteiksmes līdzekļu, vārdu un frāžu apguve dažādās valodās)</b> | <input type="checkbox"/> | <input type="checkbox"/> | <input type="checkbox"/> | <input type="checkbox"/> |
| <b>3.2.5. Temata attēlošana, izmantojot dažādus reprezentācijas veidus (piemēram, ar video, grafikiem un interaktīvām aktivitātēm)</b>                                 | <input type="checkbox"/> | <input type="checkbox"/> | <input type="checkbox"/> | <input type="checkbox"/> |

## 29. 3.3. Zināšanu veidošana

*Atzīmējiet visus atbilstošos variantus.*

|                                                                                                                                               | Nekad                    | Dažreiz                  | Bieži                    | Vienmēr                  |
|-----------------------------------------------------------------------------------------------------------------------------------------------|--------------------------|--------------------------|--------------------------|--------------------------|
| <b>3.3.1. Esošo un apgūstamo zināšanu sasaiste (piemēram, esošo zināšanu par dzīvām radībām sasaiste ar konkrētām ekosistēmām)</b>            | <input type="checkbox"/> | <input type="checkbox"/> | <input type="checkbox"/> | <input type="checkbox"/> |
| <b>3.3.2. Būtiskāko jēdzienu un sakarību salīdzināšana (piemēram, dzīvnieku raksturīgo pazīmju salīdzināšana)</b>                             | <input type="checkbox"/> | <input type="checkbox"/> | <input type="checkbox"/> | <input type="checkbox"/> |
| <b>3.3.3. Daudzveidīgu interešu un identitāšu apzināšana (piemēram, zīmējot dažādus karogus vai salīdzinot dažādas acu/matņu krāsas)</b>      | <input type="checkbox"/> | <input type="checkbox"/> | <input type="checkbox"/> | <input type="checkbox"/> |
| <b>3.3.4. Tematu sasaiste un ģeneralizēšana (piemēram, ceļa zīmju apguve pastaigu laikā vai dažādu sugu, krāsu un izmēra suņu iepazīšana)</b> | <input type="checkbox"/> | <input type="checkbox"/> | <input type="checkbox"/> | <input type="checkbox"/> |

## 4. Dažādu darbības un izteiksmes līdzekļu izmantošana Bez nosaukuma

Lūdzu, novērtējiet, cik bieži būtu jāizmanto šādus darbības un izteiksmes līdzekļus pirmsskolas izglītības vidē:

## 30. 4.1. Mijiedarbība

*Atzīmējiet visus atbilstošos variantus.*

|                                                                                                                                                                               | Nekad                    | Dažreiz                  | Bieži                    | Vienmēr                  |
|-------------------------------------------------------------------------------------------------------------------------------------------------------------------------------|--------------------------|--------------------------|--------------------------|--------------------------|
| <b>4.1.1. Piekļuves un paredzamības nodrošināšana dažādām vidēm (piemēram, izmantot taktīlas, audiālas, simboliskas un krāsainas norādes bērna apkārtējā vidē)</b>            | <input type="checkbox"/> | <input type="checkbox"/> | <input type="checkbox"/> | <input type="checkbox"/> |
| <b>4.1.2. Piekļuves nodrošināšana materiāliem un palīgriekiem (piemēram, izmantojot skaņu slāpējošas austiņas, dārznieka cimdsus un alternatīvās komunikācijas līdzekļus)</b> | <input type="checkbox"/> | <input type="checkbox"/> | <input type="checkbox"/> | <input type="checkbox"/> |

## 31. 4.2. Izteiksme un komunikācija

*Atzīmējiet visus atbilstošos variantus.*

|                                                                                                                                                  | Nekad                    | Dažreiz                  | Bieži                    | Vienmēr                  |
|--------------------------------------------------------------------------------------------------------------------------------------------------|--------------------------|--------------------------|--------------------------|--------------------------|
| <b>4.2.1. Dažādu saziņas līdzekļu izmantošana (piemēram, ļaujot bērniem paust idejas, izmantojot mākslu, mūziku vai kustību)</b>                 | <input type="checkbox"/> | <input type="checkbox"/> | <input type="checkbox"/> | <input type="checkbox"/> |
| <b>4.2.2. Dažādu materiālu nodrošināšana (piemēram, dažādu materiālu izmantošana uzdevumu veikšanā)</b>                                          | <input type="checkbox"/> | <input type="checkbox"/> | <input type="checkbox"/> | <input type="checkbox"/> |
| <b>4.2.3. Atbalsta sniegšana un pakāpeniska samazināšana (piemēram, izmantot verbālu un vizuālu fizisku atbalstu, kuru pakāpeniski samazina)</b> | <input type="checkbox"/> | <input type="checkbox"/> | <input type="checkbox"/> | <input type="checkbox"/> |
| <b>4.2.4. Dažādu runas un izteiksmes līdzekļu izmantošana (piemēram, dažādas valodas vai alternatīvās komunikācijas līdzekļi)</b>                | <input type="checkbox"/> | <input type="checkbox"/> | <input type="checkbox"/> | <input type="checkbox"/> |

## 32. 4.3. Stratēģiskās domāšanas attīstīšana

*Atzīmējiet visus atbilstošos variantus.*

|                                                                                                                                                                | Nekad                    | Dažreiz                  | Bieži                    | Vienmēr                  |
|----------------------------------------------------------------------------------------------------------------------------------------------------------------|--------------------------|--------------------------|--------------------------|--------------------------|
| <b>4.3.1. Jēgpilnu mērķu izvirzīšana kopā ar bērniem (piemēram, izvirzot mērķus apgūt trīs dažādus jaunus vārdus nedēļa laikā, veicot dažādas aktivitātes)</b> | <input type="checkbox"/> | <input type="checkbox"/> | <input type="checkbox"/> | <input type="checkbox"/> |
| <b>4.3.2. Aktivitāšu izaicinājumu paredzēšana (piemēram, bibliotēkas apmeklēšana un iespējamo grūtību paredzēšana ceļā vai bibliotēkā)</b>                     | <input type="checkbox"/> | <input type="checkbox"/> | <input type="checkbox"/> | <input type="checkbox"/> |
| <b>4.3.3. Resursu un informācijas organizācija (piemēram, marķējumi uz materiāliem un mēbelēm)</b>                                                             | <input type="checkbox"/> | <input type="checkbox"/> | <input type="checkbox"/> | <input type="checkbox"/> |
| <b>4.3.4. Sava progresu novērtēšana (piemēram, apgūtajiem konceptiem, burtiem un jēdzieniem izmantojot diagrammas vai tabulas)</b>                             | <input type="checkbox"/> | <input type="checkbox"/> | <input type="checkbox"/> | <input type="checkbox"/> |
| <b>4.3.5. Iekļaujošas prakses veicināšana (piemēram, iepazīstot dažādu kultūru svētkus vai tradīcijas)</b>                                                     | <input type="checkbox"/> | <input type="checkbox"/> | <input type="checkbox"/> | <input type="checkbox"/> |

## 5. UMD principos ietvertu mācību metožu un stratēģiju izmantošanas iespējas

33. 5.1. Kādi, Jūsaprāt, varētu būt izaicinājumi , mēģinot iekļaut dažādas iesaistīšanās, reprezentācijas vai darbības un izteiksmes stratēģijas un metodes pirmsskolas izglītības vidē?

*Atzīmējiet tikai vienu variantu.*

- Resursu trūkums
- Ierobežotas zināšanas vai apmācību iespējas
- Laika ierobežojums
- Pretestība no kolēģiem vai izglītības iestādes

34. 5.2. Kādas profesionālās kompetences pilnveides iespējas vai atbalstu būtu nepieciešams saņemt saistībā ar UMD principos norādīto metožu un stratēģiju apguvi iekļaujošas izglītības prakses veicināšanai?

*Atzīmējiet tikai vienu variantu.*

- Studiju periodā gūtās zināšanas studiju programmu ietvaros
- Formālās apmācības (kursi, semināri) profesionālās kompetences pilnveidei
- Pašmācības ceļā gūtās zināšanas, izmantojot grāmatas, tiešsaistes kursus vai pētījumus
- Zināšanas, kas gūtas, sadarbojoties ar kolēģiem, atbalsta personālu vai citu jomu profesionāļiem
- Papildus zināšanas nav nepieciešamas

---

Uzņēmums Google nav šī satura autors un to neatbalsta.

Google Veidlapas
