# Supplementary material
Source: Research Square preprint supplement (doi:10.21203/rs.3.rs-9452587/v1)
Supplement: Supplementary file 6 [file 989b0607ff5d5591a3712e44.xlsx]

## Sheet: Data
Students_teachers	Country	Gender	Education	Work_experience	Q_1.11_1	Q_1.11_2	Q_1.11_3	Q_1_11_1_TRANFORMED_to_percent	Q_1_11_2_TRANFORMED_to_percent	Q_1_11_3_TRANFORMED_to_percent	Q_2.1._1	Q_2.1._2	Q_2.1._3	Q_2.1._4	Q_2.2._1	Q_2.2._2	Q_2.2._3	Q_2.2._4	Q_2.2._5	Q_2.3._1	Q_2.3._2	Q_2.3._3	Q_2.3._4	Q_3.1._1	Q_3.1._2	Q_3.1._3	Q_3.2._1	Q_3.2._2	Q_3.2._3	Q_3.2._4	Q_3.2._5	Q_3.3._1	Q_3.3._2	Q_3.3._3	Q_3.3._4	Q_4.1._1	Q_4.1._2	Q_4.2._1	Q_4.2._2	Q_4.2._3	Q_4.2._4	Q_4.3._1	Q_4.3._2	Q_4.3._3	Q_4.3._4	Q_4.3._5	Q_5.1._1	Q_5.2._1	Q_2.1.
1	1	0	Master-Abschluss	More then 10 years	5	5	5	1	1	1	4	4	4	4	4	4	4	4	4	4	4	4	4	4	4	4	4	3	3	4	3	4	4	3	4	4	4	4	4	4	4	4	4	4	4	4	Mangel an Ressourcen	Keine einschlägigen Kenntnisse	4
1	1	0	Derzeitige Qualifizierung	More then 10 years	5	5	5	1	1	1	3	4	4	4	4	4	4	4	2	4	4	4	4	4	2	4	4	4	4	4	4	2	2	2	2	4	4	4	4	4	4	4	4	4	4	4	Begrenzte Kenntnisse oder Ausbildungsmöglichkeiten, Zeitliche Zwänge	Keine einschlägigen Kenntnisse	3.75
1	1	0	Bachelor-Abschluss	Less than 1 year	5	5	4	1	1	0.75	2	2	3	1	3	2	3	2	3	2	2	2	2	2	2	2	2	2	2	3	3	3	2	4	2	2	2	3	3	2	2	3	2	2	4	2	Mangel an Ressourcen, Zeitliche Zwänge	Im Rahmen von Studiengängen erworbene Kenntnisse, Selbstgesteuertes Lernen mit Hilfe von Ressourcen wie Büchern, Online-Kursen oder Recherchen, Kenntnisse, die durch die Zusammenarbeit mit Kollegen, Hilfskräften oder Fachleuten aus anderen Bereichen erworben wurden	2
1	1	0	Derzeitige Qualifizierung	More then 10 years	5	5	5	1	1	1	3	2	4	3	2	3	2	2	3	1	2	2	2	1	1	1	4	3	1	3	1	2	2	1	1	2	2	3	3	3	2	2	1	2	1	2	Mangel an Ressourcen, Zeitliche Zwänge	Selbstgesteuertes Lernen mit Hilfe von Ressourcen wie Büchern, Online-Kursen oder Recherchen, Kenntnisse, die durch die Zusammenarbeit mit Kollegen, Hilfskräften oder Fachleuten aus anderen Bereichen erworben wurden	3
1	1	0	Berufliche Hochschulbildung (Stufe 1)	More then 10 years	5	5	5	1	1	1	3	3	3	4	4	3	4	3	3	4	3	3	3	3	3	2	2	3	3	4	3	3	3	4	4	3	2	3	4	4	4	4	3	3	3	3	Mangel an Ressourcen, Zeitliche Zwänge	Formale Ausbildung (Kurse, Diplome) zur Verbesserung der beruflichen Kompetenz, Selbstgesteuertes Lernen mit Hilfe von Ressourcen wie Büchern, Online-Kursen oder Recherchen, Kenntnisse, die durch die Zusammenarbeit mit Kollegen, Hilfskräften oder Fachleuten aus anderen Bereichen erworben wurden	3.25
1	1	0	Bachelor-Abschluss	More then 10 years	5	5	5	1	1	1	4	4	4	4	4	3	4	4	4	3	4	2	3	2	3	2	1	4	2	3	2	4	4	4	4	3	1	4	4	4	4	2	1	4	3	3	Begrenzte Kenntnisse oder Ausbildungsmöglichkeiten, Zeitliche Zwänge	Keine einschlägigen Kenntnisse	4
1	1	0	Master-Abschluss	More then 10 years	5	5	4	1	1	0.75	2	3	4	3	2	3	4	4	3	4	4	2	4	2	3	3	3	4	3	4	2	4	4	4	4	3	4	4	4	4	4	3	3	3	2	3	Mangel an Ressourcen, Begrenzte Kenntnisse oder Ausbildungsmöglichkeiten, Widerstände von Kollegen oder der Bildungseinrichtung	Im Rahmen von Studiengängen erworbene Kenntnisse, Kenntnisse, die durch die Zusammenarbeit mit Kollegen, Hilfskräften oder Fachleuten aus anderen Bereichen erworben wurden	3
2	1	1	Master-Abschluss	No experience	2	1	3	0.25	0	0.5	3	2	3	2	1	3	2	1	3	2	1	3	2	3	2	3	2	1	4	4	4	4	2	4	1	3	2	3	2	1	1	2	3	3	2	3	Mangel an Ressourcen	Im Rahmen von Studiengängen erworbene Kenntnisse	2.5
1	1	0	Master-Abschluss	6 - 10 years	5	5	2	1	1	0.25	2	4	3	4	2	4	4	4	1	4	4	2	4	2	1	1	2	2	1	4	1	3	3	1	3	4	4	4	4	4	2	2	2	4	3	2	Mangel an Ressourcen, Begrenzte Kenntnisse oder Ausbildungsmöglichkeiten, Zeitliche Zwänge	Selbstgesteuertes Lernen mit Hilfe von Ressourcen wie Büchern, Online-Kursen oder Recherchen, Kenntnisse, die durch die Zusammenarbeit mit Kollegen, Hilfskräften oder Fachleuten aus anderen Bereichen erworben wurden	3.25
1	1	0	Bachelor-Abschluss	6 - 10 years	5	5	4	1	1	0.75	4	4	4	4	4	3	3	4	4	3	4	3	4	3	3	4	4	4	4	4	3	4	3	4	4	2	4	4	4	3	4	2	4	4	3	4	Mangel an Ressourcen, Zeitliche Zwänge, Widerstände von Kollegen oder der Bildungseinrichtung	Im Rahmen von Studiengängen erworbene Kenntnisse, Selbstgesteuertes Lernen mit Hilfe von Ressourcen wie Büchern, Online-Kursen oder Recherchen	4
1	1	0	Berufliche Hochschulbildung (Stufe 1)	6 - 10 years	5	3	4	1	0.5	0.75	4	4	3	2	2	2	3	4	3	1	3	2	4	1	3	4	3	3	2	2	3	3	3	3	4	3	4	2	4	2	2	3	3	2	3	3	Mangel an Ressourcen, Zeitliche Zwänge	Im Rahmen von Studiengängen erworbene Kenntnisse, Kenntnisse, die durch die Zusammenarbeit mit Kollegen, Hilfskräften oder Fachleuten aus anderen Bereichen erworben wurden	3.25
1	1	0	Bachelor-Abschluss	More then 10 years	5	5	5	1	1	1	3	3	3	4	3	4	4	3	4	2	3	2	3	2	3	3	2	3	2	2	2	3	3	4	4	4	3	4	4	4	2	2	2	3	2	2	Mangel an Ressourcen	Im Rahmen von Studiengängen erworbene Kenntnisse, Selbstgesteuertes Lernen mit Hilfe von Ressourcen wie Büchern, Online-Kursen oder Recherchen, Kenntnisse, die durch die Zusammenarbeit mit Kollegen, Hilfskräften oder Fachleuten aus anderen Bereichen erworben wurden	3.25
1	1	0	Berufliche Hochschulbildung (Stufe 1)	More then 10 years	5	4	4	1	0.75	0.75	4	4	4	3	3	2	2	3	4	3	4	3	2	2	2	1	1	2	1	1	1	2	2	2	3	3	3	3	3	3	2	2	2	3	1	1	Zeitliche Zwänge	Kenntnisse, die durch die Zusammenarbeit mit Kollegen, Hilfskräften oder Fachleuten aus anderen Bereichen erworben wurden	3.75
2	1	0	Berufliche Hochschulbildung (Stufe 2)	No experience	5	4	4	1	0.75	0.75	3	3	3	3	3	4	4	3	3	2	4	2	2	3	3	3	2	3	3	4	2	4	3	2	3	2	3	2	3	4	3	3	2	3	2	2	Mangel an Ressourcen	Im Rahmen von Studiengängen erworbene Kenntnisse	3
1	1	0	Berufliche Hochschulbildung (Stufe 1)	More then 10 years	5	5	5	1	1	1	4	4	4	4	3	4	4	4	4	4	4	3	3	4	3	4	3	4	3	3	3	4	4	4	4	4	4	4	4	4	4	3	4	4	3	4	Mangel an Ressourcen	Formale Ausbildung (Kurse, Diplome) zur Verbesserung der beruflichen Kompetenz, Selbstgesteuertes Lernen mit Hilfe von Ressourcen wie Büchern, Online-Kursen oder Recherchen, Kenntnisse, die durch die Zusammenarbeit mit Kollegen, Hilfskräften oder Fachleuten aus anderen Bereichen erworben wurden	4
1	1	0	Bachelor-Abschluss	More then 10 years	5	3	4	1	0.5	0.75	4	4	4	4	2	4	3	4	3	3	3	2	4	3	2	4	1	4	2	3	2	3	3	3	3	4	4	3	4	4	2	2	4	4	1	2	Begrenzte Kenntnisse oder Ausbildungsmöglichkeiten	Selbstgesteuertes Lernen mit Hilfe von Ressourcen wie Büchern, Online-Kursen oder Recherchen	4
1	1	0	Derzeitige Qualifizierung	More then 10 years	5	5	4	1	1	0.75	3	3	3	4	4	4	3	3	4	2	4	2	4	3	3	3	3	4	3	3	2	2	3	3	4	4	3	4	3	4	3	4	2	4	4	4	Zeitliche Zwänge	Formale Ausbildung (Kurse, Diplome) zur Verbesserung der beruflichen Kompetenz, Selbstgesteuertes Lernen mit Hilfe von Ressourcen wie Büchern, Online-Kursen oder Recherchen, Kenntnisse, die durch die Zusammenarbeit mit Kollegen, Hilfskräften oder Fachleuten aus anderen Bereichen erworben wurden	3.25
1	1	0	Berufliche Hochschulbildung (Stufe 1)	More then 10 years	5	4	4	1	0.75	0.75	3	3	3	4	3	3	3	3	3	3	3	3	3	3	3	3	3	3	3	3	3	3	3	3	3	3	3	3	3	3	3	3	3	3	3	3	Mangel an Ressourcen	Selbstgesteuertes Lernen mit Hilfe von Ressourcen wie Büchern, Online-Kursen oder Recherchen	3.25
2	1	0	Derzeitige Qualifizierung	1-2 years	4	5	5	0.75	1	1	3	2	3	3	2	3	3	3	3	3	3	2	2	1	1	2	3	3	3	3	2	2	3	3	2	2	3	2	3	3	3	3	2	3	2	3	Mangel an Ressourcen	Im Rahmen von Studiengängen erworbene Kenntnisse	2.75
2	1	0	Berufliche Hochschulbildung (Stufe 1)	No experience	5	3	4	1	0.5	0.75	4	3	4	4	2	3	4	4	3	3	3	3	3	2	3	3	2	3	3	4	3	4	3	3	3	3	3	3	4	2	4	3	3	3	3	3	Begrenzte Kenntnisse oder Ausbildungsmöglichkeiten	Kenntnisse, die durch die Zusammenarbeit mit Kollegen, Hilfskräften oder Fachleuten aus anderen Bereichen erworben wurden	3.75
2	1	0	Berufliche Hochschulbildung (Stufe 1)	No experience	4	4	4	0.75	0.75	0.75	4	3	4	4	3	4	4	4	3	3	4	4	4	3	4	4	3	3	3	3	4	4	3	4	4	3	3	4	3	4	3	4	3	4	3	3	Zeitliche Zwänge	Im Rahmen von Studiengängen erworbene Kenntnisse	3.75
2	1	0	Derzeitige Qualifizierung	1-2 years	5	5	4	1	1	0.75	3	2	3	4	2	3	3	4	3	3	3	3	3	2	3	4	3	2	3	4	3	3	3	3	3	3	3	3	3	3	3	3	3	3	3	3	0	0	3
2	1	0	Derzeitige Qualifizierung	Less than 1 year	5	5	4	1	1	0.75	4	3	4	4	3	4	3	4	3	4	3	2	3	3	4	4	4	4	2	2	4	3	3	3	3	3	3	3	3	4	4	3	4	3	3	3	Begrenzte Kenntnisse oder Ausbildungsmöglichkeiten	Formale Ausbildung (Kurse, Diplome) zur Verbesserung der beruflichen Kompetenz	3.75
2	1	0	Berufliche Hochschulbildung (Stufe 2)	No experience	5	5	4	1	1	0.75	3	3	4	4	2	3	3	3	3	2	3	3	2	3	3	2	2	3	2	2	2	4	3	3	3	3	3	2	4	3	3	2	3	2	3	3	Mangel an Ressourcen	Im Rahmen von Studiengängen erworbene Kenntnisse	3.5
2	1	0	Derzeitige Qualifizierung	6 - 10 years	4	5	5	0.75	1	1	3	4	4	2	3	3	3	3	4	3	4	4	3	2	3	2	3	4	2	3	3	4	3	2	3	3	4	4	4	3	3	3	3	2	4	4	Mangel an Ressourcen	Im Rahmen von Studiengängen erworbene Kenntnisse	3.25
2	1	1	Berufliche Hochschulbildung (Stufe 1)	No experience	5	4	4	1	0.75	0.75	4	4	3	3	3	3	4	4	4	4	4	3	4	4	4	3	3	3	4	3	4	4	4	4	3	3	4	3	4	3	4	4	3	4	3	3	Mangel an Ressourcen	Selbstgesteuertes Lernen mit Hilfe von Ressourcen wie Büchern, Online-Kursen oder Recherchen	3.5
1	1	0	Derzeitige Qualifizierung	More then 10 years	5	4	4	1	0.75	0.75	2	3	3	3	2	4	4	3	3	4	4	2	2	3	2	1	3	4	2	3	2	2	2	1	1	3	4	3	4	4	4	2	3	4	2	3	Mangel an Ressourcen, Zeitliche Zwänge	Formale Ausbildung (Kurse, Diplome) zur Verbesserung der beruflichen Kompetenz, Selbstgesteuertes Lernen mit Hilfe von Ressourcen wie Büchern, Online-Kursen oder Recherchen, Kenntnisse, die durch die Zusammenarbeit mit Kollegen, Hilfskräften oder Fachleuten aus anderen Bereichen erworben wurden	2.75
1	1	0	Derzeitige Qualifizierung	More then 10 years	5	5	5	1	1	1	3	4	2	2	2	3	3	3	3	3	2	3	4	2	3	3	3	3	3	3	2	3	3	4	3	3	2	4	4	3	3	3	2	4	2	2	Zeitliche Zwänge	Formale Ausbildung (Kurse, Diplome) zur Verbesserung der beruflichen Kompetenz, Kenntnisse, die durch die Zusammenarbeit mit Kollegen, Hilfskräften oder Fachleuten aus anderen Bereichen erworben wurden	2.75
1	1	0	Berufliche Hochschulbildung (Stufe 1)	More then 10 years	5	5	3	1	1	0.5	2	4	2	3	2	3	3	3	3	3	3	3	2	1	1	1	3	3	2	2	2	2	3	3	3	2	2	4	4	2	2	2	2	2	2	2	Mangel an Ressourcen, Zeitliche Zwänge	Im Rahmen von Studiengängen erworbene Kenntnisse, Formale Ausbildung (Kurse, Diplome) zur Verbesserung der beruflichen Kompetenz, Selbstgesteuertes Lernen mit Hilfe von Ressourcen wie Büchern, Online-Kursen oder Recherchen, Kenntnisse, die durch die Zusammenarbeit mit Kollegen, Hilfskräften oder Fachleuten aus anderen Bereichen erworben wurden	2.75
1	1	0	Derzeitige Qualifizierung	More then 10 years	4	4	3	0.75	0.75	0.5	3	3	3	3	4	4	4	3	4	3	3	4	3	4	3	3	3	4	3	2	2	4	4	3	4	3	3	3	3	3	2	2	2	3	2	2	Mangel an Ressourcen	Keine einschlägigen Kenntnisse	3
2	1	0	Derzeitige Qualifizierung	No experience	5	4	4	1	0.75	0.75	4	4	3	3	3	4	4	4	4	3	4	3	2	4	4	2	2	4	4	2	4	4	3	4	4	4	4	3	3	4	3	2	3	4	3	2	Zeitliche Zwänge	Im Rahmen von Studiengängen erworbene Kenntnisse	3.5
2	1	0	Derzeitige Qualifizierung	1-2 years	3	3	3	0.5	0.5	0.5	2	2	2	2	1	2	3	4	4	2	3	1	3	2	2	3	2	4	1	1	1	4	4	4	4	3	3	1	3	3	3	4	2	1	2	1	Begrenzte Kenntnisse oder Ausbildungsmöglichkeiten	Im Rahmen von Studiengängen erworbene Kenntnisse	2
1	1	0	Berufliche Hochschulbildung (Stufe 1)	More then 10 years	5	4	3	1	0.75	0.5	4	4	4	4	2	3	2	3	4	3	4	3	3	2	2	2	2	3	2	3	3	2	3	2	4	3	3	2	3	4	3	3	2	3	2	2	Mangel an Ressourcen, Zeitliche Zwänge, Widerstände von Kollegen oder der Bildungseinrichtung	Selbstgesteuertes Lernen mit Hilfe von Ressourcen wie Büchern, Online-Kursen oder Recherchen, Kenntnisse, die durch die Zusammenarbeit mit Kollegen, Hilfskräften oder Fachleuten aus anderen Bereichen erworben wurden	4
2	1	0	Derzeitige Qualifizierung	6 - 10 years	5	4	4	1	0.75	0.75	4	4	3	4	4	4	4	4	4	4	4	3	4	2	3	2	3	4	3	4	2	4	4	4	4	3	2	3	3	3	2	4	3	3	4	2	Mangel an Ressourcen	Formale Ausbildung (Kurse, Diplome) zur Verbesserung der beruflichen Kompetenz	3.75
1	1	0	Berufliche Hochschulbildung (Stufe 2)	6 - 10 years	2	2	2	0.25	0.25	0.25	2	2	1	1	2	2	1	1	1	1	2	2	1	2	1	1	2	1	1	1	2	4	4	3	4	2	2	2	1	1	1	3	2	3	3	2	Mangel an Ressourcen	Selbstgesteuertes Lernen mit Hilfe von Ressourcen wie Büchern, Online-Kursen oder Recherchen	1.5
1	1	0	Bachelor-Abschluss	6 - 10 years	4	4	3	0.75	0.75	0.5	2	2	3	3	2	3	2	4	3	2	2	3	3	1	2	3	2	3	2	2	3	3	3	2	2	3	3	2	3	3	2	1	3	3	2	1	Begrenzte Kenntnisse oder Ausbildungsmöglichkeiten, Zeitliche Zwänge	Im Rahmen von Studiengängen erworbene Kenntnisse	2.5
1	1	0	Berufliche Hochschulbildung (Stufe 1)	No experience	5	5	4	1	1	0.75	3	3	3	3	3	3	3	3	3	3	3	3	3	3	3	3	3	3	2	1	4	3	3	3	2	2	2	3	3	3	3	2	3	3	3	3	Begrenzte Kenntnisse oder Ausbildungsmöglichkeiten	Im Rahmen von Studiengängen erworbene Kenntnisse	3
1	1	0	Derzeitige Qualifizierung	More then 10 years	5	5	4	1	1	0.75	3	3	4	2	4	2	4	3	3	2	2	2	3	2	2	2	2	3	2	2	1	3	2	2	2	3	3	4	4	3	2	3	2	3	4	2	Begrenzte Kenntnisse oder Ausbildungsmöglichkeiten, Zeitliche Zwänge	Selbstgesteuertes Lernen mit Hilfe von Ressourcen wie Büchern, Online-Kursen oder Recherchen, Kenntnisse, die durch die Zusammenarbeit mit Kollegen, Hilfskräften oder Fachleuten aus anderen Bereichen erworben wurden	3
1	1	0	Derzeitige Qualifizierung	More then 10 years	5	5	5	1	1	1	3	3	4	3	3	3	3	3	3	4	3	2	3	3	3	3	3	4	3	3	2	3	4	3	3	3	3	3	3	3	2	3	3	4	3	2	Mangel an Ressourcen, Zeitliche Zwänge	Im Rahmen von Studiengängen erworbene Kenntnisse, Formale Ausbildung (Kurse, Diplome) zur Verbesserung der beruflichen Kompetenz, Selbstgesteuertes Lernen mit Hilfe von Ressourcen wie Büchern, Online-Kursen oder Recherchen, Kenntnisse, die durch die Zusammenarbeit mit Kollegen, Hilfskräften oder Fachleuten aus anderen Bereichen erworben wurden	3.25
1	1	0	Berufliche Hochschulbildung (Stufe 1)	6 - 10 years	5	4	4	1	0.75	0.75	3	4	3	4	4	2	3	4	4	3	4	3	3	3	3	3	3	4	2	2	2	3	3	3	3	4	4	4	4	4	2	3	3	4	3	3	Mangel an Ressourcen, Zeitliche Zwänge	Im Rahmen von Studiengängen erworbene Kenntnisse, Selbstgesteuertes Lernen mit Hilfe von Ressourcen wie Büchern, Online-Kursen oder Recherchen, Kenntnisse, die durch die Zusammenarbeit mit Kollegen, Hilfskräften oder Fachleuten aus anderen Bereichen erworben wurden	3.5
1	1	0	Berufliche Hochschulbildung (Stufe 1)	6 - 10 years	4	4	3	0.75	0.75	0.5	3	3	2	3	2	4	3	2	3	3	2	3	4	3	3	2	3	3	1	2	3	3	2	3	3	3	2	3	3	4	3	2	2	3	3	2	Zeitliche Zwänge, Vertretungsdienste (von kranken Kollegen), viele außerdienstliche Anforderungen (Elternabende, Fortbildungen, Feste,...)	Im Rahmen von Studiengängen erworbene Kenntnisse, Formale Ausbildung (Kurse, Diplome) zur Verbesserung der beruflichen Kompetenz, Selbstgesteuertes Lernen mit Hilfe von Ressourcen wie Büchern, Online-Kursen oder Recherchen, Kenntnisse, die durch die Zusammenarbeit mit Kollegen, Hilfskräften oder Fachleuten aus anderen Bereichen erworben wurden	2.75
1	1	0	Bachelor-Abschluss	More then 10 years	5	4	3	1	0.75	0.5	3	3	4	3	3	4	4	3	4	3	4	3	4	3	3	3	3	4	3	4	3	3	3	4	3	4	3	4	4	3	3	2	3	3	3	3	Widerstände von Kollegen oder der Bildungseinrichtung	Im Rahmen von Studiengängen erworbene Kenntnisse, Kenntnisse, die durch die Zusammenarbeit mit Kollegen, Hilfskräften oder Fachleuten aus anderen Bereichen erworben wurden	3.25
1	1	0	Bachelor-Abschluss	More then 10 years	4	5	4	0.75	1	0.75	3	4	2	4	2	3	4	3	3	2	4	2	4	2	3	2	3	4	1	3	3	4	3	3	4	3	4	4	4	4	2	2	2	4	2	2	Begrenzte Kenntnisse oder Ausbildungsmöglichkeiten	Keine einschlägigen Kenntnisse	3.25
1	1	0	Bachelor-Abschluss	6 - 10 years	5	4	4	1	0.75	0.75	4	4	4	4	3	4	3	3	4	3	4	2	3	3	3	3	3	3	2	2	4	4	3	4	4	3	4	3	4	4	2	3	3	4	2	3	Zeitliche Zwänge	Im Rahmen von Studiengängen erworbene Kenntnisse, Formale Ausbildung (Kurse, Diplome) zur Verbesserung der beruflichen Kompetenz, Selbstgesteuertes Lernen mit Hilfe von Ressourcen wie Büchern, Online-Kursen oder Recherchen, Kenntnisse, die durch die Zusammenarbeit mit Kollegen, Hilfskräften oder Fachleuten aus anderen Bereichen erworben wurden	4
1	1	0	Berufliche Hochschulbildung (Stufe 2)	More then 10 years	4	5	5	0.75	1	1	3	4	4	3	3	3	3	4	4	3	4	3	3	2	2	2	2	4	2	2	3	3	3	4	4	4	3	3	3	3	2	2	2	4	2	3	Mangel an Ressourcen, Widerstände von Kollegen oder der Bildungseinrichtung	Im Rahmen von Studiengängen erworbene Kenntnisse, Formale Ausbildung (Kurse, Diplome) zur Verbesserung der beruflichen Kompetenz, Selbstgesteuertes Lernen mit Hilfe von Ressourcen wie Büchern, Online-Kursen oder Recherchen, Kenntnisse, die durch die Zusammenarbeit mit Kollegen, Hilfskräften oder Fachleuten aus anderen Bereichen erworben wurden	3.5
1	1	0	Derzeitige Qualifizierung, Berufliche Hochschulbildung (Stufe 1)	More then 10 years	5	4	4	1	0.75	0.75	4	4	4	4	3	4	4	3	4	4	4	3	2	1	2	3	1	4	2	2	2	4	4	4	4	4	4	4	4	2	3	3	4	4	2	2	Mangel an Ressourcen, Zeitliche Zwänge, Personalmangel	Im Rahmen von Studiengängen erworbene Kenntnisse, Kenntnisse, die durch die Zusammenarbeit mit Kollegen, Hilfskräften oder Fachleuten aus anderen Bereichen erworben wurden	4
1	1	0	Berufliche Hochschulbildung (Stufe 2)	6 - 10 years	5	5	5	1	1	1	3	4	4	4	3	4	4	3	3	4	4	3	3	4	4	3	4	2	2	2	4	3	3	4	3	4	3	4	3	3	3	3	4	3	2	3	Mangel an Ressourcen, Zeitliche Zwänge, Widerstände von Kollegen oder der Bildungseinrichtung	Im Rahmen von Studiengängen erworbene Kenntnisse, Formale Ausbildung (Kurse, Diplome) zur Verbesserung der beruflichen Kompetenz, Selbstgesteuertes Lernen mit Hilfe von Ressourcen wie Büchern, Online-Kursen oder Recherchen, Kenntnisse, die durch die Zusammenarbeit mit Kollegen, Hilfskräften oder Fachleuten aus anderen Bereichen erworben wurden	3.75
1	1	0	Bachelor-Abschluss	More then 10 years	5	5	4	1	1	0.75	4	4	4	4	2	4	4	3	4	3	4	1	3	4	4	4	4	4	3	4	4	3	3	4	4	4	4	3	4	4	3	2	2	4	2	4	Mangel an Ressourcen, Widerstände von Kollegen oder der Bildungseinrichtung	Im Rahmen von Studiengängen erworbene Kenntnisse, Formale Ausbildung (Kurse, Diplome) zur Verbesserung der beruflichen Kompetenz, Selbstgesteuertes Lernen mit Hilfe von Ressourcen wie Büchern, Online-Kursen oder Recherchen, Kenntnisse, die durch die Zusammenarbeit mit Kollegen, Hilfskräften oder Fachleuten aus anderen Bereichen erworben wurden	4
1	1	0	Master-Abschluss	6 - 10 years	5	5	5	1	1	1	3	3	4	3	4	4	4	4	4	4	3	4	3	3	4	4	4	4	3	4	4	4	3	2	4	4	4	4	4	4	4	3	3	3	3	4	Mangel an Ressourcen, Zeitliche Zwänge	Im Rahmen von Studiengängen erworbene Kenntnisse, Kenntnisse, die durch die Zusammenarbeit mit Kollegen, Hilfskräften oder Fachleuten aus anderen Bereichen erworben wurden	3.25
2	1	0	Berufliche Hochschulbildung (Stufe 1)	1-2 years	5	5	5	1	1	1	2	2	2	2	2	4	1	2	2	3	1	2	2	1	2	3	1	2	2	3	1	4	3	3	3	3	3	3	3	3	3	2	3	2	3	3	Begrenzte Kenntnisse oder Ausbildungsmöglichkeiten	Im Rahmen von Studiengängen erworbene Kenntnisse	2
1	1	0	Derzeitige Qualifizierung	More then 10 years	5	4	4	1	0.75	0.75	4	4	2	3	2	3	4	4	4	3	3	2	3	2	2	3	2	4	1	2	1	2	3	3	4	2	3	3	4	3	3	1	1	3	2	2	Mangel an Ressourcen, Zeitliche Zwänge, Widerstände von Kollegen oder der Bildungseinrichtung	Im Rahmen von Studiengängen erworbene Kenntnisse, Kenntnisse, die durch die Zusammenarbeit mit Kollegen, Hilfskräften oder Fachleuten aus anderen Bereichen erworben wurden	3.25
1	1	0	Berufliche Hochschulbildung (Stufe 1)	More then 10 years	5	5	4	1	1	0.75	3	3	3	3	2	3	2	4	3	2	3	2	3	3	3	2	3	3	1	2	3	3	2	2	3	3	3	2	3	3	3	2	2	3	2	2	Mangel an Ressourcen, Zeitliche Zwänge	Keine einschlägigen Kenntnisse	3
1	1	0	Berufliche Hochschulbildung (Stufe 1)	More then 10 years	5	5	4	1	1	0.75	4	3	4	4	2	3	4	3	4	3	4	2	2	4	3	2	3	3	2	3	4	3	3	3	4	4	3	3	4	4	3	4	2	3	2	3	Zeitliche Zwänge	Im Rahmen von Studiengängen erworbene Kenntnisse, Formale Ausbildung (Kurse, Diplome) zur Verbesserung der beruflichen Kompetenz, Selbstgesteuertes Lernen mit Hilfe von Ressourcen wie Büchern, Online-Kursen oder Recherchen, Kenntnisse, die durch die Zusammenarbeit mit Kollegen, Hilfskräften oder Fachleuten aus anderen Bereichen erworben wurden	3.75
1	1	0	Bachelor-Abschluss	More then 10 years	5	5	4	1	1	0.75	3	2	3	4	2	4	3	3	4	2	4	2	4	1	1	1	2	3	2	2	1	2	2	3	2	4	4	3	4	4	3	3	2	4	2	3	Mangel an Ressourcen, Zeitliche Zwänge	Selbstgesteuertes Lernen mit Hilfe von Ressourcen wie Büchern, Online-Kursen oder Recherchen	3
1	1	0	Bachelor-Abschluss	6 - 10 years	4	3	3	0.75	0.5	0.5	3	2	3	4	3	3	3	3	3	4	4	4	4	2	3	3	3	3	3	3	3	3	3	3	3	2	3	3	3	3	3	3	3	3	3	2	Zeitliche Zwänge	Kenntnisse, die durch die Zusammenarbeit mit Kollegen, Hilfskräften oder Fachleuten aus anderen Bereichen erworben wurden	3
2	1	1	Derzeitige Qualifizierung	No experience	5	4	4	1	0.75	0.75	3	3	3	4	2	3	3	3	2	2	3	2	3	2	3	4	2	3	3	3	3	4	2	4	3	2	2	3	4	2	3	2	2	3	4	3	Zeitliche Zwänge	Im Rahmen von Studiengängen erworbene Kenntnisse	3.25
2	1	0	Bachelor-Abschluss	Less than 1 year	4	4	3	0.75	0.75	0.5	4	3	4	3	2	3	4	3	4	2	2	3	2	3	3	3	3	4	3	2	2	3	2	2	2	3	3	2	3	3	3	4	3	3	2	2	Begrenzte Kenntnisse oder Ausbildungsmöglichkeiten	Im Rahmen von Studiengängen erworbene Kenntnisse	3.5
1	1	0	Berufliche Hochschulbildung (Stufe 1), Bachelor-Abschluss	More then 10 years	5	5	4	1	1	0.75	2	3	3	3	2	3	4	3	3	3	3	2	3	3	3	2	2	3	2	2	3	2	3	3	3	3	3	3	3	3	2	3	2	3	2	3	Zeitliche Zwänge	Im Rahmen von Studiengängen erworbene Kenntnisse, Selbstgesteuertes Lernen mit Hilfe von Ressourcen wie Büchern, Online-Kursen oder Recherchen, Kenntnisse, die durch die Zusammenarbeit mit Kollegen, Hilfskräften oder Fachleuten aus anderen Bereichen erworben wurden	2.75
2	1	0	Derzeitige Qualifizierung	Less than 1 year	4	4	3	0.75	0.75	0.5	4	4	4	4	3	3	4	4	4	4	4	4	4	3	3	4	4	4	4	4	4	4	4	4	4	4	4	3	4	3	4	3	3	4	4	4	Mangel an Ressourcen	Im Rahmen von Studiengängen erworbene Kenntnisse	4
1	1	0	Derzeitige Qualifizierung	More then 10 years	5	5	4	1	1	0.75	3	3	2	3	2	3	4	3	4	3	4	1	3	3	3	3	3	4	2	2	3	3	3	3	4	3	3	4	4	3	3	3	3	3	3	3	Zeitliche Zwänge	Selbstgesteuertes Lernen mit Hilfe von Ressourcen wie Büchern, Online-Kursen oder Recherchen, Kenntnisse, die durch die Zusammenarbeit mit Kollegen, Hilfskräften oder Fachleuten aus anderen Bereichen erworben wurden	2.75
1	1	0	Berufliche Hochschulbildung (Stufe 1)	More then 10 years	5	5	5	1	1	1	3	3	4	3	2	4	3	3	3	3	4	4	3	3	3	3	4	4	3	2	3	3	3	3	4	4	3	4	4	4	3	4	4	4	3	3	Zeitliche Zwänge	Formale Ausbildung (Kurse, Diplome) zur Verbesserung der beruflichen Kompetenz, Selbstgesteuertes Lernen mit Hilfe von Ressourcen wie Büchern, Online-Kursen oder Recherchen, Kenntnisse, die durch die Zusammenarbeit mit Kollegen, Hilfskräften oder Fachleuten aus anderen Bereichen erworben wurden	3.25
1	1	0	Berufliche Hochschulbildung (Stufe 1)	1-2 years	5	5	5	1	1	1	3	3	4	4	2	4	3	3	4	3	4	1	3	3	3	3	3	4	2	2	3	3	3	1	3	4	3	4	3	4	3	2	2	4	1	2	Mangel an Ressourcen	Kenntnisse, die durch die Zusammenarbeit mit Kollegen, Hilfskräften oder Fachleuten aus anderen Bereichen erworben wurden	3.5
1	1	0	Berufliche Hochschulbildung (Stufe 1)	6 - 10 years	5	5	3	1	1	0.5	3	4	4	3	1	3	3	3	4	1	4	1	4	2	3	2	1	2	1	2	3	2	3	2	3	4	3	4	4	4	4	1	1	1	1	1	Mangel an Ressourcen	Im Rahmen von Studiengängen erworbene Kenntnisse, Formale Ausbildung (Kurse, Diplome) zur Verbesserung der beruflichen Kompetenz, Selbstgesteuertes Lernen mit Hilfe von Ressourcen wie Büchern, Online-Kursen oder Recherchen, Kenntnisse, die durch die Zusammenarbeit mit Kollegen, Hilfskräften oder Fachleuten aus anderen Bereichen erworben wurden	3.5
1	1	0	Derzeitige Qualifizierung	More then 10 years	4	4	4	0.75	0.75	0.75	4	3	4	4	4	4	4	4	4	3	4	3	3	2	2	2	3	3	2	2	2	4	4	4	4	4	3	3	3	3	3	3	2	3	1	2	Mangel an Ressourcen, Zeitliche Zwänge	Keine einschlägigen Kenntnisse	3.75
1	1	0	Bachelor-Abschluss	More then 10 years	5	5	3	1	1	0.5	3	4	3	4	3	3	4	4	4	3	4	2	4	2	2	3	1	4	3	2	1	3	3	3	2	3	2	4	4	3	2	4	2	2	2	2	Mangel an Ressourcen, Zeitliche Zwänge	Selbstgesteuertes Lernen mit Hilfe von Ressourcen wie Büchern, Online-Kursen oder Recherchen, Kenntnisse, die durch die Zusammenarbeit mit Kollegen, Hilfskräften oder Fachleuten aus anderen Bereichen erworben wurden	3.5
1	1	0	Derzeitige Qualifizierung	6 - 10 years	5	5	2	1	1	0.25	4	4	4	4	2	4	3	4	2	4	4	2	4	2	2	2	3	3	2	3	2	3	2	2	2	2	2	2	4	4	4	2	2	4	2	3	Mangel an Ressourcen, Begrenzte Kenntnisse oder Ausbildungsmöglichkeiten	Keine einschlägigen Kenntnisse	4
2	1	0	Derzeitige Qualifizierung	No experience	5	5	5	1	1	1	3	3	4	4	3	4	4	4	3	3	4	4	4	4	4	3	4	4	3	4	4	4	4	4	4	3	4	4	4	4	4	4	4	3	4	3	Mangel an Ressourcen	Kenntnisse, die durch die Zusammenarbeit mit Kollegen, Hilfskräften oder Fachleuten aus anderen Bereichen erworben wurden	3.5
2	1	0	Berufliche Hochschulbildung (Stufe 2)	Less than 1 year	5	4	5	1	0.75	1	3	4	3	4	2	3	4	4	4	3	4	4	4	2	2	4	2	2	1	2	2	3	4	3	2	4	2	4	3	3	2	3	2	4	2	1	Widerstände von Kollegen oder der Bildungseinrichtung	Im Rahmen von Studiengängen erworbene Kenntnisse	3.5
2	1	0	Berufliche Hochschulbildung (Stufe 1)	6 - 10 years	5	3	5	1	0.5	1	4	4	2	4	2	4	4	4	3	2	2	1	3	3	4	3	4	4	4	4	4	4	3	4	4	4	4	4	4	4	4	4	4	4	4	4	Mangel an Ressourcen	Formale Ausbildung (Kurse, Diplome) zur Verbesserung der beruflichen Kompetenz	3.5
2	1	0	Derzeitige Qualifizierung	1-2 years	3	3	3	0.5	0.5	0.5	2	2	2	1	1	2	2	2	1	3	3	2	3	3	2	3	2	3	1	2	1	2	2	1	1	3	3	3	3	4	3	3	3	2	2	1	Zeitliche Zwänge	Formale Ausbildung (Kurse, Diplome) zur Verbesserung der beruflichen Kompetenz	1.75
2	1	0	Derzeitige Qualifizierung	Less than 1 year	5	5	5	1	1	1	4	4	4	4	4	4	4	4	4	4	4	3	4	3	2	2	2	4	3	4	2	3	4	4	2	4	2	4	4	4	3	3	2	4	1	3	Widerstände von Kollegen oder der Bildungseinrichtung	Kenntnisse, die durch die Zusammenarbeit mit Kollegen, Hilfskräften oder Fachleuten aus anderen Bereichen erworben wurden	4
2	1	0	Berufliche Hochschulbildung (Stufe 1)	Less than 1 year	5	4	4	1	0.75	0.75	3	3	4	2	2	3	3	3	4	3	3	2	3	2	2	2	3	3	3	3	2	3	3	2	2	3	2	2	2	3	2	3	2	4	2	1	Begrenzte Kenntnisse oder Ausbildungsmöglichkeiten	Formale Ausbildung (Kurse, Diplome) zur Verbesserung der beruflichen Kompetenz	3
2	1	0	Derzeitige Qualifizierung	1-2 years	5	4	4	1	0.75	0.75	2	2	2	2	2	3	3	3	2	3	3	3	2	2	2	1	2	2	2	2	2	2	2	2	2	2	2	2	2	2	2	3	2	3	3	1	Mangel an Ressourcen	Kenntnisse, die durch die Zusammenarbeit mit Kollegen, Hilfskräften oder Fachleuten aus anderen Bereichen erworben wurden	2
2	1	0	Derzeitige Qualifizierung	Less than 1 year	5	4	4	1	0.75	0.75	2	3	3	3	1	3	3	3	3	3	3	2	1	1	3	3	3	3	2	2	2	3	2	1	1	2	1	1	2	4	1	2	1	3	2	1	Mangel an Ressourcen	Selbstgesteuertes Lernen mit Hilfe von Ressourcen wie Büchern, Online-Kursen oder Recherchen	2.75
1	1	0	Derzeitige Qualifizierung	6 - 10 years	4	5	5	0.75	1	1	4	4	4	4	4	3	3	4	4	4	4	4	3	3	3	3	4	4	2	2	3	4	3	4	4	2	2	3	4	4	3	4	4	4	4	4	Mangel an Ressourcen, Zeitliche Zwänge, Widerstände von Kollegen oder der Bildungseinrichtung	Im Rahmen von Studiengängen erworbene Kenntnisse, Formale Ausbildung (Kurse, Diplome) zur Verbesserung der beruflichen Kompetenz, Selbstgesteuertes Lernen mit Hilfe von Ressourcen wie Büchern, Online-Kursen oder Recherchen, Kenntnisse, die durch die Zusammenarbeit mit Kollegen, Hilfskräften oder Fachleuten aus anderen Bereichen erworben wurden	4
1	1	0	Berufliche Hochschulbildung (Stufe 1)	More then 10 years	5	5	4	1	1	0.75	4	4	4	4	4	4	4	4	4	3	4	4	4	3	3	4	4	4	3	3	3	4	4	4	4	4	4	4	4	4	4	4	4	4	3	4	Zeitliche Zwänge	Im Rahmen von Studiengängen erworbene Kenntnisse, Formale Ausbildung (Kurse, Diplome) zur Verbesserung der beruflichen Kompetenz, Selbstgesteuertes Lernen mit Hilfe von Ressourcen wie Büchern, Online-Kursen oder Recherchen, Kenntnisse, die durch die Zusammenarbeit mit Kollegen, Hilfskräften oder Fachleuten aus anderen Bereichen erworben wurden	4
1	1	0	Berufliche Hochschulbildung (Stufe 1)	6 - 10 years	5	4	2	1	0.75	0.25	4	4	4	4	2	3	3	3	1	4	4	4	4	2	2	4	4	3	2	3	2	2	2	2	2	4	4	4	4	3	3	1	2	2	2	1	Mangel an Ressourcen, Begrenzte Kenntnisse oder Ausbildungsmöglichkeiten, Zeitliche Zwänge	Keine einschlägigen Kenntnisse	4
2	1	0	Derzeitige Qualifizierung	Less than 1 year	4	5	3	0.75	1	0.5	3	2	3	3	3	4	3	2	2	3	3	3	3	3	3	4	4	4	3	4	3	3	3	4	3	3	4	4	4	4	4	3	2	2	2	3	Zeitliche Zwänge	Selbstgesteuertes Lernen mit Hilfe von Ressourcen wie Büchern, Online-Kursen oder Recherchen	2.75
2	1	0	Berufliche Hochschulbildung (Stufe 1)	No experience	5	5	5	1	1	1	3	4	3	3	3	3	4	4	4	4	3	3	3	4	3	3	3	4	4	3	3	4	4	3	3	3	3	4	3	4	4	3	4	3	4	3	Mangel an Ressourcen	Im Rahmen von Studiengängen erworbene Kenntnisse	3.25
2	1	0	Berufliche Hochschulbildung (Stufe 2)	No experience	3	3	3	0.5	0.5	0.5	3	3	2	2	1	3	2	2	1	2	2	2	2	1	1	1	1	3	3	1	1	2	4	2	2	4	4	2	2	2	1	2	2	2	1	1	Begrenzte Kenntnisse oder Ausbildungsmöglichkeiten	Formale Ausbildung (Kurse, Diplome) zur Verbesserung der beruflichen Kompetenz	2.5
2	1	0	Berufliche Hochschulbildung (Stufe 1)	1-2 years	5	4	4	1	0.75	0.75	3	3	4	4	3	4	4	4	3	3	3	3	3	4	3	3	3	3	3	3	4	4	2	2	3	3	4	4	4	3	3	4	4	3	3	3	Zeitliche Zwänge	Kenntnisse, die durch die Zusammenarbeit mit Kollegen, Hilfskräften oder Fachleuten aus anderen Bereichen erworben wurden	3.5
2	1	0	Derzeitige Qualifizierung	Less than 1 year	5	5	5	1	1	1	3	3	3	2	2	4	3	3	4	3	3	3	3	4	3	4	2	4	2	2	4	4	4	4	3	3	4	2	4	4	2	2	2	1	2	3	Zeitliche Zwänge	Im Rahmen von Studiengängen erworbene Kenntnisse	2.75
2	1	0	Berufliche Hochschulbildung (Stufe 1)	Less than 1 year	4	5	4	0.75	1	0.75	2	3	4	4	2	4	4	4	4	2	2	2	2	2	3	2	4	3	2	1	2	2	1	2	3	3	3	4	4	3	3	2	3	1	2	2	Zeitliche Zwänge	Im Rahmen von Studiengängen erworbene Kenntnisse	3.25
2	1	0	Berufliche Hochschulbildung (Stufe 1)	No experience	5	5	5	1	1	1	4	3	4	4	3	3	3	3	3	3	3	3	3	3	3	3	3	3	3	3	3	3	3	3	3	3	3	3	3	3	3	3	3	3	3	3	Mangel an Ressourcen	Im Rahmen von Studiengängen erworbene Kenntnisse	3.75
1	1	0	Bachelor-Abschluss	1-2 years	4	4	4	0.75	0.75	0.75	3	3	3	3	3	3	3	3	3	3	3	3	3	3	3	3	3	2	2	2	2	3	2	3	2	2	3	3	3	3	3	3	3	3	3	2	Mangel an Ressourcen	Im Rahmen von Studiengängen erworbene Kenntnisse	3
2	1	0	Berufliche Hochschulbildung (Stufe 1)	No experience	5	5	3	1	1	0.5	2	2	3	3	3	4	3	4	4	3	4	2	2	2	3	3	2	3	2	1	3	3	3	2	1	3	3	3	3	3	3	3	3	3	3	3	0	0	2.5
2	1	0	Derzeitige Qualifizierung	No experience	5	5	5	1	1	1	3	4	4	3	4	3	2	3	3	3	3	3	3	3	2	3	3	3	3	3	3	3	3	2	2	2	3	3	3	3	3	2	2	2	2	2	Zeitliche Zwänge	Kenntnisse, die durch die Zusammenarbeit mit Kollegen, Hilfskräften oder Fachleuten aus anderen Bereichen erworben wurden	3.5
2	1	0	Derzeitige Qualifizierung	1-2 years	5	4	4	1	0.75	0.75	3	4	3	2	1	2	4	3	2	3	3	2	3	2	2	3	4	4	4	2	3	1	2	1	2	4	2	2	3	3	2	2	3	4	3	3	Mangel an Ressourcen	Kenntnisse, die durch die Zusammenarbeit mit Kollegen, Hilfskräften oder Fachleuten aus anderen Bereichen erworben wurden	3
1	1	0	Derzeitige Qualifizierung	1-2 years	5	4	5	1	0.75	1	4	4	4	4	3	4	4	4	4	3	3	2	2	3	4	3	3	3	3	2	4	4	3	3	4	4	3	4	4	4	4	3	2	4	3	4	Zeitliche Zwänge	Im Rahmen von Studiengängen erworbene Kenntnisse, Selbstgesteuertes Lernen mit Hilfe von Ressourcen wie Büchern, Online-Kursen oder Recherchen, Kenntnisse, die durch die Zusammenarbeit mit Kollegen, Hilfskräften oder Fachleuten aus anderen Bereichen erworben wurden	4
2	1	0	Berufliche Hochschulbildung (Stufe 1)	1-2 years	5	3	5	1	0.5	1	3	3	3	3	4	3	4	4	3	2	3	2	3	2	3	3	3	4	2	2	3	4	3	4	4	3	4	4	4	4	3	4	2	4	4	2	Zeitliche Zwänge	Formale Ausbildung (Kurse, Diplome) zur Verbesserung der beruflichen Kompetenz	3
1	1	0	Berufliche Hochschulbildung (Stufe 2)	More then 10 years	5	4	4	1	0.75	0.75	2	2	3	3	2	3	3	3	4	3	4	3	4	2	2	1	2	3	2	2	1	2	3	2	3	3	3	3	4	4	3	3	3	3	2	2	Mangel an Ressourcen, Zeitliche Zwänge	Formale Ausbildung (Kurse, Diplome) zur Verbesserung der beruflichen Kompetenz, Selbstgesteuertes Lernen mit Hilfe von Ressourcen wie Büchern, Online-Kursen oder Recherchen, Kenntnisse, die durch die Zusammenarbeit mit Kollegen, Hilfskräften oder Fachleuten aus anderen Bereichen erworben wurden	2.5
1	1	0	Master-Abschluss	More then 10 years	4	4	3	0.75	0.75	0.5	2	3	4	3	4	3	4	3	4	3	3	2	3	2	2	3	2	2	2	2	2	2	2	2	2	2	2	4	4	4	4	4	3	3	2	3	Mangel an Ressourcen, Zeitliche Zwänge	Im Rahmen von Studiengängen erworbene Kenntnisse, Selbstgesteuertes Lernen mit Hilfe von Ressourcen wie Büchern, Online-Kursen oder Recherchen	3
1	1	0	Master-Abschluss	More then 10 years	5	4	5	1	0.75	1	4	2	4	2	2	4	3	2	4	2	3	1	3	2	2	2	2	4	2	2	2	3	4	3	4	3	3	4	4	3	3	2	2	3	2	1	Mangel an Ressourcen	Im Rahmen von Studiengängen erworbene Kenntnisse, Formale Ausbildung (Kurse, Diplome) zur Verbesserung der beruflichen Kompetenz, Selbstgesteuertes Lernen mit Hilfe von Ressourcen wie Büchern, Online-Kursen oder Recherchen, Kenntnisse, die durch die Zusammenarbeit mit Kollegen, Hilfskräften oder Fachleuten aus anderen Bereichen erworben wurden	3
1	1	0	Master-Abschluss	More then 10 years	5	5	5	1	1	1	3	3	4	3	4	4	3	4	4	3	4	3	3	3	3	4	3	3	3	3	3	4	4	3	3	4	4	3	3	3	3	4	4	3	3	3	Zeitliche Zwänge	Formale Ausbildung (Kurse, Diplome) zur Verbesserung der beruflichen Kompetenz	3.25
1	1	0	Berufliche Hochschulbildung (Stufe 1)	More then 10 years	5	3	3	1	0.5	0.5	4	4	4	4	2	3	2	3	3	2	2	1	2	1	1	1	1	2	2	2	1	2	3	2	2	2	3	3	4	4	4	2	3	2	1	2	Zeitliche Zwänge, Junge Kinder brauchen Menschen die ihnen die umwelt näher bringen	Im Rahmen von Studiengängen erworbene Kenntnisse, Formale Ausbildung (Kurse, Diplome) zur Verbesserung der beruflichen Kompetenz, Selbstgesteuertes Lernen mit Hilfe von Ressourcen wie Büchern, Online-Kursen oder Recherchen, Kenntnisse, die durch die Zusammenarbeit mit Kollegen, Hilfskräften oder Fachleuten aus anderen Bereichen erworben wurden	4
1	1	0	Derzeitige Qualifizierung	More then 10 years	4	3	3	0.75	0.5	0.5	2	3	4	3	2	4	4	2	4	2	2	1	2	3	2	2	1	2	2	1	1	1	3	3	3	3	3	3	4	4	3	2	2	2	1	2	Mangel an Ressourcen	Formale Ausbildung (Kurse, Diplome) zur Verbesserung der beruflichen Kompetenz, Kenntnisse, die durch die Zusammenarbeit mit Kollegen, Hilfskräften oder Fachleuten aus anderen Bereichen erworben wurden	3
1	1	0	Berufliche Hochschulbildung (Stufe 1)	More then 10 years	3	3	3	0.5	0.5	0.5	2	2	2	2	2	2	2	2	2	2	2	2	2	2	2	2	2	2	2	2	2	2	2	2	2	2	2	2	2	2	2	2	2	2	2	2	Mangel an Ressourcen, Begrenzte Kenntnisse oder Ausbildungsmöglichkeiten, Widerstände von Kollegen oder der Bildungseinrichtung	Formale Ausbildung (Kurse, Diplome) zur Verbesserung der beruflichen Kompetenz	2
1	1	0	Master-Abschluss	More then 10 years	5	5	5	1	1	1	4	3	2	4	2	4	3	4	4	3	4	3	4	3	3	2	3	4	3	4	3	3	3	2	4	3	4	4	4	4	4	3	3	2	3	2	Mangel an Ressourcen, Zeitliche Zwänge	Selbstgesteuertes Lernen mit Hilfe von Ressourcen wie Büchern, Online-Kursen oder Recherchen	3.25
1	1	0	Berufliche Hochschulbildung (Stufe 1)	More then 10 years	5	5	5	1	1	1	3	4	3	3	3	4	3	3	2	3	4	2	3	2	2	2	3	4	1	2	2	4	3	3	4	3	3	3	4	3	3	3	3	3	2	2	Zeitliche Zwänge	Formale Ausbildung (Kurse, Diplome) zur Verbesserung der beruflichen Kompetenz, Selbstgesteuertes Lernen mit Hilfe von Ressourcen wie Büchern, Online-Kursen oder Recherchen, Kenntnisse, die durch die Zusammenarbeit mit Kollegen, Hilfskräften oder Fachleuten aus anderen Bereichen erworben wurden	3.25
1	1	0	Derzeitige Qualifizierung	6 - 10 years	5	5	2	1	1	0.25	4	4	4	4	3	4	4	4	2	2	4	2	4	1	1	4	2	4	4	4	2	4	3	2	3	4	2	2	4	2	2	2	2	2	2	2	Mangel an Ressourcen, Zeitliche Zwänge	Keine einschlägigen Kenntnisse	4
1	1	0	Bachelor-Abschluss	More then 10 years	3	3	3	0.5	0.5	0.5	4	4	4	4	2	4	4	4	2	4	4	4	4	2	2	2	2	4	4	4	4	2	3	2	4	4	4	4	4	4	4	2	2	3	2	2	Mangel an Ressourcen, Begrenzte Kenntnisse oder Ausbildungsmöglichkeiten, Zeitliche Zwänge	Selbstgesteuertes Lernen mit Hilfe von Ressourcen wie Büchern, Online-Kursen oder Recherchen, Kenntnisse, die durch die Zusammenarbeit mit Kollegen, Hilfskräften oder Fachleuten aus anderen Bereichen erworben wurden	4
1	1	0	Berufliche Hochschulbildung (Stufe 1), Berufliche Hochschulbildung (Stufe 2)	More then 10 years	5	5	4	1	1	0.75	3	3	4	3	3	4	2	3	4	2	4	2	3	1	2	2	3	3	2	2	2	3	3	4	2	2	2	3	3	4	2	2	1	4	2	3	Mangel an Ressourcen, Begrenzte Kenntnisse oder Ausbildungsmöglichkeiten, Zeitliche Zwänge	Im Rahmen von Studiengängen erworbene Kenntnisse, Formale Ausbildung (Kurse, Diplome) zur Verbesserung der beruflichen Kompetenz, Selbstgesteuertes Lernen mit Hilfe von Ressourcen wie Büchern, Online-Kursen oder Recherchen, Kenntnisse, die durch die Zusammenarbeit mit Kollegen, Hilfskräften oder Fachleuten aus anderen Bereichen erworben wurden	3.25
1	1	0	Berufliche Hochschulbildung (Stufe 1)	More then 10 years	5	5	5	1	1	1	3	3	3	3	4	4	4	4	4	3	4	3	3	2	2	1	3	3	3	1	1	2	2	2	3	3	3	3	3	3	3	3	2	3	3	1	Mangel an Ressourcen, Begrenzte Kenntnisse oder Ausbildungsmöglichkeiten, Zeitliche Zwänge, Widerstände von Kollegen oder der Bildungseinrichtung	Formale Ausbildung (Kurse, Diplome) zur Verbesserung der beruflichen Kompetenz, Selbstgesteuertes Lernen mit Hilfe von Ressourcen wie Büchern, Online-Kursen oder Recherchen, Kenntnisse, die durch die Zusammenarbeit mit Kollegen, Hilfskräften oder Fachleuten aus anderen Bereichen erworben wurden	3
1	1	0	Berufliche Hochschulbildung (Stufe 2)	More then 10 years	5	1	4	1	0	0.75	2	2	2	2	2	2	2	2	3	2	2	2	1	1	2	2	2	2	2	2	2	2	2	2	2	1	1	2	2	2	2	2	2	2	2	2	Mangel an Ressourcen, Zeitliche Zwänge, Widerstände von Kollegen oder der Bildungseinrichtung	Im Rahmen von Studiengängen erworbene Kenntnisse, Formale Ausbildung (Kurse, Diplome) zur Verbesserung der beruflichen Kompetenz, Selbstgesteuertes Lernen mit Hilfe von Ressourcen wie Büchern, Online-Kursen oder Recherchen, Kenntnisse, die durch die Zusammenarbeit mit Kollegen, Hilfskräften oder Fachleuten aus anderen Bereichen erworben wurden	2
1	1	0	Bachelor-Abschluss	More then 10 years	5	5	5	1	1	1	3	3	4	4	1	4	3	4	4	3	4	3	3	1	2	2	3	3	2	3	3	1	2	2	1	4	4	4	4	3	2	3	1	3	3	2	Mangel an Ressourcen, Zeitliche Zwänge, Widerstände von Kollegen oder der Bildungseinrichtung, Rahmenbedingungen, fehlendes Material, finanzielle Mittel	Im Rahmen von Studiengängen erworbene Kenntnisse, Formale Ausbildung (Kurse, Diplome) zur Verbesserung der beruflichen Kompetenz, Selbstgesteuertes Lernen mit Hilfe von Ressourcen wie Büchern, Online-Kursen oder Recherchen, Kenntnisse, die durch die Zusammenarbeit mit Kollegen, Hilfskräften oder Fachleuten aus anderen Bereichen erworben wurden	3.5
1	1	0	Master-Abschluss	More then 10 years	5	5	5	1	1	1	4	4	4	4	2	4	4	4	2	4	4	4	4	4	4	4	2	4	4	4	4	4	4	3	3	4	4	4	4	4	4	2	4	4	2	4	Mangel an Ressourcen	Im Rahmen von Studiengängen erworbene Kenntnisse	4
1	1	0	Derzeitige Qualifizierung	1-2 years	5	5	5	1	1	1	4	4	4	4	4	4	4	4	3	4	4	3	2	4	2	3	2	4	4	4	2	2	3	3	3	4	2	3	3	3	3	2	2	3	2	3	Begrenzte Kenntnisse oder Ausbildungsmöglichkeiten	Keine einschlägigen Kenntnisse	4
1	1	0	Bachelor-Abschluss	6 - 10 years	5	5	4	1	1	0.75	3	2	3	2	3	3	3	3	4	3	2	2	3	2	2	2	4	4	2	2	2	2	3	3	2	3	2	3	3	3	2	3	1	3	3	3	Mangel an Ressourcen, Zeitliche Zwänge	Keine einschlägigen Kenntnisse	2.5
1	1	0	Master-Abschluss	More then 10 years	4	4	5	0.75	0.75	1	3	3	4	4	3	4	4	4	4	3	3	3	4	3	3	4	3	4	4	4	4	4	4	3	4	4	4	4	3	3	4	3	3	3	4	4	Mangel an Ressourcen, Zeitliche Zwänge, Widerstände von Kollegen oder der Bildungseinrichtung	Selbstgesteuertes Lernen mit Hilfe von Ressourcen wie Büchern, Online-Kursen oder Recherchen	3.5
1	1	0	Bachelor-Abschluss	More then 10 years	5	5	4	1	1	0.75	2	3	3	4	2	3	3	2	3	3	3	2	2	2	2	2	3	4	1	3	2	2	3	3	4	3	4	2	3	4	3	2	2	3	2	2	Mangel an Ressourcen, Begrenzte Kenntnisse oder Ausbildungsmöglichkeiten, Zeitliche Zwänge, Schwierigkeit für jedes Kind eine individuelle Methode zu finden, bzw. gleichzeitig umzusetzen	Keine einschlägigen Kenntnisse	3
1	1	0	Bachelor-Abschluss	1-2 years	5	5	5	1	1	1	3	3	3	4	3	3	4	3	3	3	3	2	3	4	4	2	4	3	2	2	4	4	2	3	3	3	4	3	3	4	3	3	3	4	2	2	Begrenzte Kenntnisse oder Ausbildungsmöglichkeiten, Zeitliche Zwänge	Im Rahmen von Studiengängen erworbene Kenntnisse, Kenntnisse, die durch die Zusammenarbeit mit Kollegen, Hilfskräften oder Fachleuten aus anderen Bereichen erworben wurden	3.25
1	1	0	Derzeitige Qualifizierung	More then 10 years	5	5	2	1	1	0.25	3	4	4	4	2	3	3	4	3	2	3	1	3	3	3	2	3	3	2	4	3	4	3	3	3	4	2	4	4	4	4	4	2	2	2	2	Zeitliche Zwänge, Widerstände von Kollegen oder der Bildungseinrichtung	Formale Ausbildung (Kurse, Diplome) zur Verbesserung der beruflichen Kompetenz, Kenntnisse, die durch die Zusammenarbeit mit Kollegen, Hilfskräften oder Fachleuten aus anderen Bereichen erworben wurden	3.75
1	1	0	Derzeitige Qualifizierung	More then 10 years	5	4	4	1	0.75	0.75	3	4	4	3	3	4	4	3	4	2	4	3	4	2	3	4	2	4	3	4	3	4	4	4	4	3	3	3	4	4	2	2	3	3	3	3	Mangel an Ressourcen	Formale Ausbildung (Kurse, Diplome) zur Verbesserung der beruflichen Kompetenz, Selbstgesteuertes Lernen mit Hilfe von Ressourcen wie Büchern, Online-Kursen oder Recherchen, Kenntnisse, die durch die Zusammenarbeit mit Kollegen, Hilfskräften oder Fachleuten aus anderen Bereichen erworben wurden	3.5
1	1	0	Derzeitige Qualifizierung	More then 10 years	5	2	4	1	0.25	0.75	3	4	4	2	3	3	4	3	4	4	4	2	4	2	3	2	2	4	1	3	4	3	4	4	4	4	4	3	4	4	3	2	2	2	1	3	Mangel an Ressourcen, Zeitliche Zwänge, Widerstände von Kollegen oder der Bildungseinrichtung, Zu wenige Pädagog*innen in Gruppe (Kind-Pädagog*innenschlüssel)	Formale Ausbildung (Kurse, Diplome) zur Verbesserung der beruflichen Kompetenz, Selbstgesteuertes Lernen mit Hilfe von Ressourcen wie Büchern, Online-Kursen oder Recherchen, Kenntnisse, die durch die Zusammenarbeit mit Kollegen, Hilfskräften oder Fachleuten aus anderen Bereichen erworben wurden	3.25
1	1	0	Master-Abschluss	6 - 10 years	5	5	5	1	1	1	3	4	3	4	3	3	3	3	2	2	4	4	3	3	3	3	4	4	2	2	3	4	4	4	3	3	3	3	2	3	2	3	2	3	3	3			3.5
1	1	0	Berufliche Hochschulbildung (Stufe 1)	More then 10 years	5	5	5	1	1	1	3	4	3	3	2	4	3	3	4	3	4	2	4	1	3	2	3	3	2	2	2	2	3	3	3	4	3	3	4	3	3	3	1	4	3	3	Mangel an Ressourcen, Zeitliche Zwänge, Widerstände von Kollegen oder der Bildungseinrichtung	Im Rahmen von Studiengängen erworbene Kenntnisse, Formale Ausbildung (Kurse, Diplome) zur Verbesserung der beruflichen Kompetenz, Selbstgesteuertes Lernen mit Hilfe von Ressourcen wie Büchern, Online-Kursen oder Recherchen, Kenntnisse, die durch die Zusammenarbeit mit Kollegen, Hilfskräften oder Fachleuten aus anderen Bereichen erworben wurden	3.25
1	1	0	Derzeitige Qualifizierung	More then 10 years	3	3	3	0.5	0.5	0.5	3	4	3	4	2	3	3	3	4	2	3	1	3	3	2	3	3	3	3	2	3	3	2	3	4	2	3	3	3	3	2	2	1	2	1	2	Mangel an Ressourcen	Formale Ausbildung (Kurse, Diplome) zur Verbesserung der beruflichen Kompetenz, Selbstgesteuertes Lernen mit Hilfe von Ressourcen wie Büchern, Online-Kursen oder Recherchen	3.5
1	1	0	Berufliche Hochschulbildung (Stufe 1)	More then 10 years	5	5	5	1	1	1	2	2	3	3	4	3	4	2	4	4	4	4	4	3	2	2	3	4	2	2	1	3	3	2	3	3	2	3	2	3	2	1	2	2	2	1	Mangel an Ressourcen, Zeitliche Zwänge, Widerstände von Kollegen oder der Bildungseinrichtung	Formale Ausbildung (Kurse, Diplome) zur Verbesserung der beruflichen Kompetenz, Selbstgesteuertes Lernen mit Hilfe von Ressourcen wie Büchern, Online-Kursen oder Recherchen, Kenntnisse, die durch die Zusammenarbeit mit Kollegen, Hilfskräften oder Fachleuten aus anderen Bereichen erworben wurden, Lernen aus der Praxis, Reflexion der Planung, Selbstreflexion, Erfahrungen aus der Praxis neu bewerten…	2.5
1	1	0	Derzeitige Qualifizierung	More then 10 years	5	5	5	1	1	1	3	3	3	4	3	4	4	4	4	1	4	2	4	3	3	4	1	3	4	4	4	4	4	4	4	4	4	3	4	4	3	3	2	4	1	3	Mangel an Ressourcen, Begrenzte Kenntnisse oder Ausbildungsmöglichkeiten, Zeitliche Zwänge	Im Rahmen von Studiengängen erworbene Kenntnisse, Kenntnisse, die durch die Zusammenarbeit mit Kollegen, Hilfskräften oder Fachleuten aus anderen Bereichen erworben wurden	3.25
1	1	0	Derzeitige Qualifizierung	More then 10 years	5	4	5	1	0.75	1	2	4	3	4	3	4	4	3	4	3	4	1	2	2	4	3	2	3	1	1	3	3	4	3	4	3	4	2	2	3	2	2	1	3	1	1	Mangel an Ressourcen, Widerstände von Kollegen oder der Bildungseinrichtung	Im Rahmen von Studiengängen erworbene Kenntnisse, Formale Ausbildung (Kurse, Diplome) zur Verbesserung der beruflichen Kompetenz, Selbstgesteuertes Lernen mit Hilfe von Ressourcen wie Büchern, Online-Kursen oder Recherchen, Kenntnisse, die durch die Zusammenarbeit mit Kollegen, Hilfskräften oder Fachleuten aus anderen Bereichen erworben wurden	3.25
1	1	0	Master-Abschluss	More then 10 years	5	3	5	1	0.5	1	3	4	3	4	3	3	3	4	4	3	4	2	3	2	4	3	4	4	2	4	3	4	4	4	4	4	4	3	4	3	3	2	1	4	1	2	Zeitliche Zwänge, Personalknappheit/Erwachsenen-Kind-Schlüssel	Im Rahmen von Studiengängen erworbene Kenntnisse, Formale Ausbildung (Kurse, Diplome) zur Verbesserung der beruflichen Kompetenz, Kenntnisse, die durch die Zusammenarbeit mit Kollegen, Hilfskräften oder Fachleuten aus anderen Bereichen erworben wurden	3.5
1	1	0	Bachelor-Abschluss	6 - 10 years	5	5	5	1	1	1	4	4	4	4	4	4	4	4	4	4	4	3	4	2	2	4	4	4	4	2	2	4	4	3	3	2	1	2	4	2	2	3	3	2	3	3	eigentlich keine	Keine einschlägigen Kenntnisse	4
1	1	0	Bachelor-Abschluss	6 - 10 years	5	5	4	1	1	0.75	3	3	2	2	3	3	3	4	4	3	3	2	3	2	2	2	3	3	2	2	2	3	3	4	2	3	2	3	3	3	3	2	2	3	3	3	Mangel an Ressourcen, Zeitliche Zwänge	Im Rahmen von Studiengängen erworbene Kenntnisse	2.5
1	2	0	Doktorský titul	More then 10 years	5	5	5	1	1	1	3	4	4	4	3	3	3	3	3	3	3	2	3	2	3	3	3	3	2	3	3	3	3	2	3	3	3	3	3	3	2	3	3	3	3	3	Časová omezení	Formální vzdělávání (kurzy, semináře) ke zvýšení odborné způsobilosti, Samostatné učení prostřednictvím zdrojů, jako jsou knihy, online kurzy nebo výzkum., Znalosti získané spoluprací s kolegy, podpůrným personálem nebo odborníky z jiných oborů	3.75
1	2	0	Magisterský titul	3-5 years	5	5	4	1	1	0.75	3	3	4	2	4	3	4	4	2	2	3	3	3	3	4	4	3	3	1	2	3	3	4	4	4	3	3	2	4	3	2	3	4	2	3	3	Časová omezení, Odpor kolegů nebo vzdělávací instituce, Nezajem ditete	Znalosti získané v rámci studijních programů, Formální vzdělávání (kurzy, semináře) ke zvýšení odborné způsobilosti, Samostatné učení prostřednictvím zdrojů, jako jsou knihy, online kurzy nebo výzkum., Znalosti získané spoluprací s kolegy, podpůrným personálem nebo odborníky z jiných oborů	3
1	2	0	Magisterský titul	6 - 10 years	5	4	5	1	0.75	1	3	3	2	4	3	4	3	3	4	2	3	4	2	2	4	4	3	2	3	2	4	3	3	3	3	4	3	3	4	4	4	3	3	4	3	4	Časová omezení, Odpor kolegů nebo vzdělávací instituce	Znalosti získané v rámci studijních programů, Formální vzdělávání (kurzy, semináře) ke zvýšení odborné způsobilosti, Samostatné učení prostřednictvím zdrojů, jako jsou knihy, online kurzy nebo výzkum., Znalosti získané spoluprací s kolegy, podpůrným personálem nebo odborníky z jiných oborů	3
1	2	0	Středoškolské vzdělání (úroveň 1)	More then 10 years	5	5	5	1	1	1	3	3	3	3	3	4	3	3	3	3	3	3	3	2	2	3	3	3	2	2	2	3	3	2	3	3	3	3	3	3	3	3	2	1	3	3	Časová omezení	Znalosti získané v rámci studijních programů, Formální vzdělávání (kurzy, semináře) ke zvýšení odborné způsobilosti, Samostatné učení prostřednictvím zdrojů, jako jsou knihy, online kurzy nebo výzkum., Znalosti získané spoluprací s kolegy, podpůrným personálem nebo odborníky z jiných oborů	3
1	2	0	Magisterský titul	More then 10 years	4	4	4	0.75	0.75	0.75	1	3	3	2	2	4	3	3	3	2	2	2	2	1	3	2	1	2	1	1	2	2	3	3	3	3	1	3	4	3	1	2	3	1	1	2	Omezené znalosti nebo možnosti školení	Samostatné učení prostřednictvím zdrojů, jako jsou knihy, online kurzy nebo výzkum.	2.25
1	2	0	Magisterský titul	More then 10 years	5	5	5	1	1	1	4	4	4	4	4	4	4	4	4	4	4	4	4	3	3	4	3	3	3	3	3	3	3	3	3	3	3	2	2	2	2	3	2	2	3	2	velký počet dětí ve třídě a malý počet pedagogů	Znalosti získané v rámci studijních programů, Formální vzdělávání (kurzy, semináře) ke zvýšení odborné způsobilosti, Samostatné učení prostřednictvím zdrojů, jako jsou knihy, online kurzy nebo výzkum., Znalosti získané spoluprací s kolegy, podpůrným personálem nebo odborníky z jiných oborů	4
1	2	0	Magisterský titul	More then 10 years	5	4	5	1	0.75	1	2	4	4	2	3	3	3	3	3	3	2	2	2	3	3	3	2	3	2	3	4	4	3	3	3	3	4	3	4	4	4	4	4	3	4	4	Časová omezení	Znalosti získané v rámci studijních programů, Formální vzdělávání (kurzy, semináře) ke zvýšení odborné způsobilosti, Samostatné učení prostřednictvím zdrojů, jako jsou knihy, online kurzy nebo výzkum.	3
1	2	0	Magisterský titul	More then 10 years	5	5	5	1	1	1	3	3	3	3	3	3	3	3	3	2	3	4	2	4	3	2	2	3	1	2	3	3	3	2	3	3	2	2	3	3	2	4	3	3	4	3	Časová omezení	Znalosti získané v rámci studijních programů, Formální vzdělávání (kurzy, semináře) ke zvýšení odborné způsobilosti, Samostatné učení prostřednictvím zdrojů, jako jsou knihy, online kurzy nebo výzkum., Znalosti získané spoluprací s kolegy, podpůrným personálem nebo odborníky z jiných oborů	3
1	2	0	Magisterský titul	Less than 1 year	5	5	4	1	1	0.75	3	3	4	3	4	3	4	4	4	4	3	3	3	3	3	3	3	3	3	2	3	4	4	4	4	3	2	2	3	2	2	2	3	2	3	3	Časová omezení	Formální vzdělávání (kurzy, semináře) ke zvýšení odborné způsobilosti, Znalosti získané spoluprací s kolegy, podpůrným personálem nebo odborníky z jiných oborů	3.25
1	2	0	Magisterský titul	No experience	5	4	4	1	0.75	0.75	3	3	3	3	3	3	3	3	3	3	3	3	3	3	3	3	3	3	2	2	3	3	3	3	3	3	3	3	3	3	3	3	3	3	3	3	0	0	3
1	2	0	Středoškolské vzdělání (úroveň 1)	More then 10 years	5	5	5	1	1	1	3	4	4	4	3	3	3	4	4	3	4	3	3	3	3	3	3	3	2	3	3	3	3	3	3	3	2	3	3	3	3	3	3	3	3	3	Omezené znalosti nebo možnosti školení, Časová omezení	Formální vzdělávání (kurzy, semináře) ke zvýšení odborné způsobilosti, Samostatné učení prostřednictvím zdrojů, jako jsou knihy, online kurzy nebo výzkum.	3.75
1	2	0	Magisterský titul	No experience	5	5	4	1	1	0.75	3	2	3	3	3	3	3	3	3	3	3	3	3	2	2	2	2	2	3	2	3	1	2	2	2	2	1	2	3	3	1	3	2	2	2	2	Časová omezení	Znalosti získané spoluprací s kolegy, podpůrným personálem nebo odborníky z jiných oborů	2.75
1	2	0	Magisterský titul	3-5 years	5	5	5	1	1	1	4	4	4	4	4	4	4	4	4	4	4	4	4	3	3	3	3	3	3	3	3	3	3	3	3	3	3	3	3	3	3	3	3	3	3	3	Časová omezení	Znalosti získané v rámci studijních programů, Formální vzdělávání (kurzy, semináře) ke zvýšení odborné způsobilosti, Samostatné učení prostřednictvím zdrojů, jako jsou knihy, online kurzy nebo výzkum., Znalosti získané spoluprací s kolegy, podpůrným personálem nebo odborníky z jiných oborů	4
1	2	0	Magisterský titul	More then 10 years	5	5	5	1	1	1	4	4	4	4	4	3	3	3	4	3	2	3	2	2	2	3	4	4	3	4	3	4	4	4	4	3	3	3	3	2	3	3	4	4	4	4	Časová omezení	Formální vzdělávání (kurzy, semináře) ke zvýšení odborné způsobilosti, Samostatné učení prostřednictvím zdrojů, jako jsou knihy, online kurzy nebo výzkum., Znalosti získané spoluprací s kolegy, podpůrným personálem nebo odborníky z jiných oborů	4
1	2	0	Středoškolské vzdělání (úroveň 1)	More then 10 years	5	4	4	1	0.75	0.75	4	4	3	4	3	3	3	4	4	3	4	4	2	4	3	2	1	2	2	3	3	3	2	3	2	3	2	2	4	4	2	4	4	3	4	3	Časová omezení, Odpor kolegů nebo vzdělávací instituce	Samostatné učení prostřednictvím zdrojů, jako jsou knihy, online kurzy nebo výzkum.	3.75
1	2	0	Magisterský titul	6 - 10 years	5	5	5	1	1	1	3	3	3	3	4	3	4	3	4	3	3	3	4	3	3	3	2	3	2	3	3	3	3	3	3	2	3	3	3	4	3	3	3	3	3	3	Nedostatek zdrojů, Časová omezení	Znalosti získané v rámci studijních programů, Samostatné učení prostřednictvím zdrojů, jako jsou knihy, online kurzy nebo výzkum., Znalosti získané spoluprací s kolegy, podpůrným personálem nebo odborníky z jiných oborů	3
1	2	0	Magisterský titul	No experience	3	3	3	0.5	0.5	0.5	3	3	3	4	3	3	3	3	3	2	3	3	3	3	3	3	2	3	2	2	2	3	3	2	3	2	2	4	4	3	3	3	3	3	4	3	Nedostatek zdrojů, Časová omezení, Odpor kolegů nebo vzdělávací instituce	Formální vzdělávání (kurzy, semináře) ke zvýšení odborné způsobilosti, Samostatné učení prostřednictvím zdrojů, jako jsou knihy, online kurzy nebo výzkum.	3.25
1	2	0	Magisterský titul	More then 10 years	4	4	4	0.75	0.75	0.75	3	4	3	4	4	4	3	4	4	3	4	2	4	3	3	4	3	4	2	4	3	3	3	4	4	3	2	3	3	4	2	3	4	3	1	2	Nedostatek zdrojů, Časová omezení, Odpor kolegů nebo vzdělávací instituce	Samostatné učení prostřednictvím zdrojů, jako jsou knihy, online kurzy nebo výzkum.	3.5
1	2	0	Magisterský titul	More then 10 years	5	5	5	1	1	1	3	3	3	3	3	3	3	3	3	3	3	3	3	3	3	3	3	3	3	2	3	2	3	2	3	3	3	3	3	3	3	3	3	3	3	3	Omezené znalosti nebo možnosti školení, Časová omezení	Formální vzdělávání (kurzy, semináře) ke zvýšení odborné způsobilosti, Znalosti získané spoluprací s kolegy, podpůrným personálem nebo odborníky z jiných oborů	3
1	2	0	Magisterský titul	More then 10 years	5	4	4	1	0.75	0.75	3	3	3	2	3	3	4	4	3	3	4	3	4	3	4	3	3	4	2	2	4	3	3	2	3	3	2	3	4	4	3	2	3	3	4	3	Časová omezení	Formální vzdělávání (kurzy, semináře) ke zvýšení odborné způsobilosti, Samostatné učení prostřednictvím zdrojů, jako jsou knihy, online kurzy nebo výzkum., Znalosti získané spoluprací s kolegy, podpůrným personálem nebo odborníky z jiných oborů	2.75
1	2	0	Magisterský titul	Less than 1 year	5	5	5	1	1	1	3	3	3	2	3	3	4	4	4	3	3	3	3	2	4	2	3	3	3	4	2	2	3	4	4	3	2	3	3	3	3	3	4	3	2	3	Časová omezení	Formální vzdělávání (kurzy, semináře) ke zvýšení odborné způsobilosti, Znalosti získané spoluprací s kolegy, podpůrným personálem nebo odborníky z jiných oborů	2.75
1	2	0	Bakalářský titul	No experience	4	4	4	0.75	0.75	0.75	2	3	3	2	3	3	4	3	4	3	4	3	3	3	3	3	4	3	3	4	3	3	3	3	4	3	2	4	3	2	3	3	4	3	2	3	Omezené znalosti nebo možnosti školení	Znalosti získané v rámci studijních programů, Samostatné učení prostřednictvím zdrojů, jako jsou knihy, online kurzy nebo výzkum., Znalosti získané spoluprací s kolegy, podpůrným personálem nebo odborníky z jiných oborů	2.5
1	2	0	Středoškolské vzdělání (úroveň 1)	More then 10 years	4	5	4	0.75	1	0.75	3	3	2	1	3	3	4	3	4	3	3	2	3	2	2	2	1	2	2	2	3	2	3	2	2	2	1	3	3	3	3	3	4	3	1	2	Časová omezení	Znalosti získané v rámci studijních programů, Formální vzdělávání (kurzy, semináře) ke zvýšení odborné způsobilosti, Znalosti získané spoluprací s kolegy, podpůrným personálem nebo odborníky z jiných oborů	2.25
2	2	0	Středoškolské vzdělání (úroveň 1)	No experience	5	4	5	1	0.75	1	4	4	3	4	3	3	4	4	3	3	3	4	4	4	4	4	4	4	4	4	4	4	4	4	4	4	4	4	4	4	4	4	4	4	4	4	Omezené znalosti nebo možnosti školení	Formální vzdělávání (kurzy, semináře) pro zvýšení odborné způsobilosti	3.75
1	2	0	Bakalářský titul	3-5 years	4	4	3	0.75	0.75	0.5	2	3	3	2	2	4	3	2	3	1	3	3	3	2	2	2	1	2	1	1	3	2	2	2	2	3	1	2	2	2	2	2	3	3	3	2	Nedostatek zdrojů, Omezené znalosti nebo možnosti školení, Časová omezení	Formální vzdělávání (kurzy, semináře) ke zvýšení odborné způsobilosti	2.5
1	2	0	Magisterský titul	3-5 years	5	5	5	1	1	1	3	4	4	3	2	4	4	4	4	2	4	4	4	2	3	3	3	4	2	1	4	4	4	3	4	4	4	4	4	4	2	2	4	4	4	2	Omezené znalosti nebo možnosti školení, Časová omezení	Znalosti získané v rámci studijních programů, Formální vzdělávání (kurzy, semináře) ke zvýšení odborné způsobilosti, Samostatné učení prostřednictvím zdrojů, jako jsou knihy, online kurzy nebo výzkum.	3.5
1	2	0	V současné době pokračuji v získávání kvalifikace předškolní pedagog	1-2 years	5	5	5	1	1	1	3	4	3	4	3	4	4	4	4	3	4	4	3	3	4	4	3	2	2	2	2	2	3	2	3	1	2	3	3	2	2	3	3	3	2	2	Omezené znalosti nebo možnosti školení	Znalosti získané spoluprací s kolegy, podpůrným personálem nebo odborníky z jiných oborů	3.5
1	2	0	Bakalářský titul	1-2 years	4	4	3	0.75	0.75	0.5	1	2	3	2	2	3	3	3	3	3	2	2	3	1	3	2	2	3	2	2	3	3	3	2	2	3	2	3	3	2	2	2	3	3	2	3	Časová omezení	Žádné relevantní znalosti	2
1	2	0	Bakalářský titul	Less than 1 year	4	5	5	0.75	1	1	1	2	3	2	1	2	3	4	4	2	2	1	1	1	1	1	1	2	1	1	3	3	2	3	2	1	1	1	3	3	2	1	2	1	1	2	Omezené znalosti nebo možnosti školení	Znalosti získané v rámci studijních programů, Formální vzdělávání (kurzy, semináře) ke zvýšení odborné způsobilosti, Znalosti získané spoluprací s kolegy, podpůrným personálem nebo odborníky z jiných oborů	2
1	2	0	Bakalářský titul	6 - 10 years	5	4	4	1	0.75	0.75	3	3	3	3	3	3	3	3	3	3	3	3	3	3	3	3	3	3	3	3	3	3	3	3	3	3	3	3	3	3	3	3	3	3	3	3	Nedostatek zdrojů, Časová omezení	Znalosti získané v rámci studijních programů, Znalosti získané spoluprací s kolegy, podpůrným personálem nebo odborníky z jiných oborů	3
1	2	0	Středoškolské vzdělání (úroveň 1)	More then 10 years	5	4	4	1	0.75	0.75	3	3	3	3	4	3	3	3	4	3	3	3	3	2	3	2	2	3	2	2	3	3	3	3	3	3	3	3	3	3	2	3	4	3	2	3	Časová omezení	Formální vzdělávání (kurzy, semináře) ke zvýšení odborné způsobilosti, Samostatné učení prostřednictvím zdrojů, jako jsou knihy, online kurzy nebo výzkum., Znalosti získané spoluprací s kolegy, podpůrným personálem nebo odborníky z jiných oborů	3
1	2	0	Bakalářský titul	6 - 10 years	5	4	3	1	0.75	0.5	2	3	3	1	1	2	3	2	3	2	2	2	2	1	3	2	1	2	1	1	1	3	3	3	3	1	1	3	3	3	1	1	3	2	2	1	Nedostatek zdrojů, Omezené znalosti nebo možnosti školení	Znalosti získané v rámci studijních programů, Formální vzdělávání (kurzy, semináře) ke zvýšení odborné způsobilosti, Samostatné učení prostřednictvím zdrojů, jako jsou knihy, online kurzy nebo výzkum.	2.25
1	2	0	Magisterský titul	More then 10 years	4	4	4	0.75	0.75	0.75	2	4	4	2	3	4	3	4	4	2	4	1	2	1	2	2	2	4	2	2	4	4	4	4	4	4	3	3	4	4	4	4	3	3	3	3	Časová omezení	Znalosti získané spoluprací s kolegy, podpůrným personálem nebo odborníky z jiných oborů	3
1	2	0	Vyšší odborné vzdělání (úroveň 2)	More then 10 years	5	3	5	1	0.5	1	3	4	4	3	2	3	3	3	2	2	2	1	1	2	3	1	1	2	1	1	3	3	2	2	2	2	2	3	3	3	1	1	2	1	1	3	Omezené znalosti nebo možnosti školení	Samostatné učení prostřednictvím zdrojů, jako jsou knihy, online kurzy nebo výzkum.	3.5
1	2	0	Kvalifikace Chůva pro děti v dětské skupině, Vyšší odborné vzdělání (úroveň 2)	6 - 10 years	4	5	4	0.75	1	0.75	4	4	4	2	1	3	2	1	3	1	4	1	2	1	2	1	2	3	1	1	1	2	3	1	3	2	1	3	3	3	1	1	2	2	1	2	Nedostatek zdrojů, Časová omezení	Znalosti získané v rámci studijních programů, Formální vzdělávání (kurzy, semináře) ke zvýšení odborné způsobilosti	3.5
1	2	0	Středoškolské vzdělání (úroveň 1)	6 - 10 years	2	2	2	0.25	0.25	0.25	3	3	3	3	3	3	3	3	3	3	3	3	3	3	3	3	3	3	3	3	3	3	3	3	3	3	3	3	3	3	3	3	3	3	3	3	Omezené znalosti nebo možnosti školení	Formální vzdělávání (kurzy, semináře) ke zvýšení odborné způsobilosti	3
1	2	0	Středoškolské vzdělání (úroveň 1)	3-5 years	4	4	2	0.75	0.75	0.25	2	3	3	4	2	3	3	2	4	2	3	1	2	3	4	2	3	2	1	1	1	2	3	2	2	2	1	2	3	3	3	2	3	3	4	2	Nedostatek zdrojů	Samostatné učení prostřednictvím zdrojů, jako jsou knihy, online kurzy nebo výzkum.	3
1	2	0	Středoškolské vzdělání (úroveň 1)	6 - 10 years	4	4	4	0.75	0.75	0.75	3	3	3	2	3	3	3	3	3	1	1	1	2	1	2	3	2	2	2	2	1	4	4	4	4	3	3	2	2	2	2	2	3	2	2	2	Časová omezení	Formální vzdělávání (kurzy, semináře) ke zvýšení odborné způsobilosti, Samostatné učení prostřednictvím zdrojů, jako jsou knihy, online kurzy nebo výzkum.	2.75
1	2	0	Bakalářský titul	1-2 years	5	5	5	1	1	1	4	4	4	4	4	3	4	3	4	4	4	4	4	2	2	3	1	2	1	1	1	4	3	3	3	3	3	2	3	3	3	2	2	2	4	4	Omezené znalosti nebo možnosti školení, Časová omezení	Samostatné učení prostřednictvím zdrojů, jako jsou knihy, online kurzy nebo výzkum., Znalosti získané spoluprací s kolegy, podpůrným personálem nebo odborníky z jiných oborů	4
1	2	0	Vyšší odborné vzdělání (úroveň 2)	More then 10 years	5	5	4	1	1	0.75	2	3	3	2	4	3	4	3	3	4	3	3	2	2	3	2	2	3	3	4	2	2	3	3	4	4	3	3	4	4	4	3	4	3	2	2	Časová omezení	Znalosti získané v rámci studijních programů, Formální vzdělávání (kurzy, semináře) ke zvýšení odborné způsobilosti	2.5
1	2	0	Bakalářský titul	More then 10 years	5	5	3	1	1	0.5	2	3	3	2	2	4	3	3	3	3	3	2	3	3	3	3	3	4	3	3	3	3	2	3	3	3	3	2	3	3	4	1	2	2	2	2	Časová omezení	Znalosti získané v rámci studijních programů, Formální vzdělávání (kurzy, semináře) ke zvýšení odborné způsobilosti, Samostatné učení prostřednictvím zdrojů, jako jsou knihy, online kurzy nebo výzkum., Znalosti získané spoluprací s kolegy, podpůrným personálem nebo odborníky z jiných oborů	2.5
1	2	0	Bakalářský titul	More then 10 years	5	3	3	1	0.5	0.5	3	4	2	3	2	3	3	3	3	3	2	3	3	2	4	2	3	3	2	1	2	3	3	3	2	3	4	3	3	3	2	1	2	4	3	2	Omezené znalosti nebo možnosti školení, Časová omezení	Formální vzdělávání (kurzy, semináře) ke zvýšení odborné způsobilosti, Samostatné učení prostřednictvím zdrojů, jako jsou knihy, online kurzy nebo výzkum., Znalosti získané spoluprací s kolegy, podpůrným personálem nebo odborníky z jiných oborů	3
2	2	0	V současné době pokračuji v získávání kvalifikace předškolní pedagog, Bakalářský titul	Less than 1 year	5	5	5	1	1	1	4	4	4	4	4	4	3	4	4	4	3	3	3	3	3	3	3	3	3	3	3	3	3	3	3	3	4	4	4	4	4	3	4	4	3	3	Odpor kolegů nebo vzdělávací instituce	Znalosti získané spoluprací s kolegy, podpůrným personálem nebo odborníky z jiných oborů	4
1	2	0	Bakalářský titul	3-5 years	3	3	3	0.5	0.5	0.5	2	3	2	3	2	2	2	2	3	3	3	3	2	2	2	2	1	2	1	1	1	2	2	2	2	2	2	2	2	2	2	2	2	2	2	2	Omezené znalosti nebo možnosti školení	Formální vzdělávání (kurzy, semináře) ke zvýšení odborné způsobilosti	2.5
2	2	0	Bakalářský titul	1-2 years	4	4	4	0.75	0.75	0.75	3	3	3	1	3	3	4	4	3	4	4	3	3	2	2	2	1	3	2	2	3	2	4	2	3	3	2	3	3	3	1	3	3	4	2	2	Odpor kolegů nebo vzdělávací instituce	Znalosti získané v rámci studijních programů	2.5
2	2	0	V současné době pokračuji v získávání kvalifikace předškolní pedagog, Středoškolské vzdělání (úroveň 1)	Less than 1 year	5	5	5	1	1	1	3	4	4	4	4	3	3	4	4	3	4	4	4	4	4	4	4	4	3	3	4	4	4	4	4	4	3	4	4	3	3	4	4	4	4	4	Nedostatek zdrojů	Znalosti získané v rámci studijních programů	3.75
1	2	0	Bakalářský titul	More then 10 years	5	4	5	1	0.75	1	4	4	4	4	3	3	3	3	3	3	3	3	4	4	3	3	3	3	2	2	4	3	4	3	4	4	3	3	4	4	4	4	3	4	4	4	Časová omezení	Formální vzdělávání (kurzy, semináře) ke zvýšení odborné způsobilosti	4
1	2	0	Magisterský titul	6 - 10 years	5	5	5	1	1	1	3	4	4	2	3	4	3	3	4	2	3	2	3	1	4	3	3	4	3	3	4	3	4	4	4	2	2	3	3	2	3	3	4	3	2	4	Časová omezení	Znalosti získané v rámci studijních programů, Formální vzdělávání (kurzy, semináře) ke zvýšení odborné způsobilosti, Samostatné učení prostřednictvím zdrojů, jako jsou knihy, online kurzy nebo výzkum., Znalosti získané spoluprací s kolegy, podpůrným personálem nebo odborníky z jiných oborů	3.25
1	2	0	Magisterský titul	1-2 years	5	5	5	1	1	1	4	3	3	2	2	3	3	2	2	2	2	1	1	1	2	2	1	2	3	2	1	2	3	2	3	2	2	2	3	2	1	2	2	1	1	2	Odpor kolegů nebo vzdělávací instituce	Samostatné učení prostřednictvím zdrojů, jako jsou knihy, online kurzy nebo výzkum.	3
1	2	0	Magisterský titul	6 - 10 years	5	5	5	1	1	1	3	3	3	3	2	2	3	3	3	3	3	2	3	3	3	3	2	2	2	3	3	3	3	2	2	3	3	2	3	3	2	3	3	3	2	3	Nedostatek zdrojů, Omezené znalosti nebo možnosti školení, Časová omezení	Formální vzdělávání (kurzy, semináře) ke zvýšení odborné způsobilosti, Samostatné učení prostřednictvím zdrojů, jako jsou knihy, online kurzy nebo výzkum., Znalosti získané spoluprací s kolegy, podpůrným personálem nebo odborníky z jiných oborů	3
1	2	0	Magisterský titul	6 - 10 years	5	5	5	1	1	1	3	4	4	3	3	4	3	4	4	3	3	2	2	3	4	3	3	3	3	3	3	4	3	3	3	2	2	2	3	3	2	2	3	3	3	3	Nedostatek zdrojů, Omezené znalosti nebo možnosti školení, Časová omezení	Znalosti získané v rámci studijních programů, Formální vzdělávání (kurzy, semináře) ke zvýšení odborné způsobilosti, Samostatné učení prostřednictvím zdrojů, jako jsou knihy, online kurzy nebo výzkum., Znalosti získané spoluprací s kolegy, podpůrným personálem nebo odborníky z jiných oborů	3.5
1	2	0	Středoškolské vzdělání (úroveň 1)	More then 10 years	5	5	5	1	1	1	3	3	4	2	3	4	3	3	3	3	4	1	4	3	3	2	1	3	3	3	4	2	3	3	3	3	3	3	3	3	2	4	4	4	3	2	Časová omezení	Formální vzdělávání (kurzy, semináře) ke zvýšení odborné způsobilosti, Samostatné učení prostřednictvím zdrojů, jako jsou knihy, online kurzy nebo výzkum., Znalosti získané spoluprací s kolegy, podpůrným personálem nebo odborníky z jiných oborů	3
1	2	0	Středoškolské vzdělání (úroveň 1)	More then 10 years	4	5	5	0.75	1	1	3	3	4	2	3	3	3	3	4	3	3	2	3	1	2	1	2	3	2	3	2	2	3	3	2	2	2	2	3	3	1	3	1	1	2	2	Časová omezení	Formální vzdělávání (kurzy, semináře) ke zvýšení odborné způsobilosti, Samostatné učení prostřednictvím zdrojů, jako jsou knihy, online kurzy nebo výzkum.	3
1	2	0	Doktorský titul	3-5 years	4	5	4	0.75	1	0.75	3	2	3	3	2	4	3	4	3	3	3	4	3	1	3	4	2	4	2	3	4	4	3	3	4	2	4	3	4	4	2	2	3	3	2	3	Omezené znalosti nebo možnosti školení, Časová omezení	Znalosti získané spoluprací s kolegy, podpůrným personálem nebo odborníky z jiných oborů	2.75
1	2	0	Bakalářský titul	Less than 1 year	5	5	4	1	1	0.75	3	3	3	3	2	2	2	3	2	2	2	4	3	4	3	4	3	3	2	2	2	2	4	3	3	2	2	2	3	3	3	2	3	3	2	2	Omezené znalosti nebo možnosti školení, Časová omezení	Znalosti získané v rámci studijních programů, Samostatné učení prostřednictvím zdrojů, jako jsou knihy, online kurzy nebo výzkum., Znalosti získané spoluprací s kolegy, podpůrným personálem nebo odborníky z jiných oborů	3
1	2	0	Středoškolské vzdělání (úroveň 1)	More then 10 years	5	5	5	1	1	1	3	4	3	3	3	3	3	3	3	3	3	3	3	3	3	2	3	3	2	3	3	3	3	3	3	3	3	3	3	3	3	2	3	2	3	3	Omezené znalosti nebo možnosti školení, Časová omezení	Formální vzdělávání (kurzy, semináře) ke zvýšení odborné způsobilosti, Samostatné učení prostřednictvím zdrojů, jako jsou knihy, online kurzy nebo výzkum., Znalosti získané spoluprací s kolegy, podpůrným personálem nebo odborníky z jiných oborů	3.25
1	2	0	Magisterský titul	6 - 10 years	4	4	4	0.75	0.75	0.75	3	3	3	3	2	3	3	2	3	2	2	2	3	1	2	2	1	2	1	1	2	2	2	2	2	2	1	3	4	3	1	2	3	2	2	2	Nedostatek zdrojů, Časová omezení	Samostatné učení prostřednictvím zdrojů, jako jsou knihy, online kurzy nebo výzkum., Znalosti získané spoluprací s kolegy, podpůrným personálem nebo odborníky z jiných oborů	3
1	2	0	Magisterský titul	More then 10 years	5	5	5	1	1	1	3	3	3	2	3	3	4	3	3	4	4	3	3	3	4	3	3	3	2	2	3	4	4	3	3	3	2	3	4	4	3	2	2	3	3	3	Omezené znalosti nebo možnosti školení, Časová omezení	Znalosti získané v rámci studijních programů, Formální vzdělávání (kurzy, semináře) ke zvýšení odborné způsobilosti, Samostatné učení prostřednictvím zdrojů, jako jsou knihy, online kurzy nebo výzkum., Znalosti získané spoluprací s kolegy, podpůrným personálem nebo odborníky z jiných oborů	2.75
1	2	0	Středoškolské vzdělání (úroveň 1)	More then 10 years	1	1	2	0	0	0.25	2	3	3	3	4	2	4	3	4	4	2	4	3	2	3	4	2	3	2	2	4	3	3	3	4	2	3	3	4	4	2	4	4	3	4	4	Omezené znalosti nebo možnosti školení	Formální vzdělávání (kurzy, semináře) ke zvýšení odborné způsobilosti, Samostatné učení prostřednictvím zdrojů, jako jsou knihy, online kurzy nebo výzkum., Znalosti získané spoluprací s kolegy, podpůrným personálem nebo odborníky z jiných oborů	2.75
1	2	0	Vyšší odborné vzdělání (úroveň 2)	More then 10 years	5	4	5	1	0.75	1	4	4	4	4	4	4	4	4	4	4	4	4	4	3	3	3	3	3	3	3	3	4	4	3	3	4	3	3	3	4	3	4	4	3	4	3	Časová omezení	Formální vzdělávání (kurzy, semináře) ke zvýšení odborné způsobilosti, Samostatné učení prostřednictvím zdrojů, jako jsou knihy, online kurzy nebo výzkum.	4
1	2	0	Kvalifikace Chůva pro děti v dětské skupině	1-2 years	5	4	4	1	0.75	0.75	2	3	2	1	2	3	2	2	3	2	2	1	2	1	1	2	2	1	1	1	1	2	4	3	3	1	1	1	3	1	2	1	1	1	1	2	Časová omezení	Samostatné učení prostřednictvím zdrojů, jako jsou knihy, online kurzy nebo výzkum.	2
1	2	0	Kvalifikace Chůva pro děti v dětské skupině, Středoškolské vzdělání (úroveň 1)	6 - 10 years	4	4	4	0.75	0.75	0.75	4	4	3	4	3	4	4	2	3	2	2	2	3	1	2	3	1	2	1	1	2	2	3	4	4	3	3	4	4	3	2	2	4	2	1	2	Nedostatek zdrojů, Omezené znalosti nebo možnosti školení, Časová omezení	Formální vzdělávání (kurzy, semináře) ke zvýšení odborné způsobilosti, Samostatné učení prostřednictvím zdrojů, jako jsou knihy, online kurzy nebo výzkum., Znalosti získané spoluprací s kolegy, podpůrným personálem nebo odborníky z jiných oborů	3.75
1	2	0	Magisterský titul	More then 10 years	4	5	5	0.75	1	1	3	2	2	4	3	4	2	3	3	3	3	3	3	2	2	3	2	3	3	3	2	3	3	3	3	3	3	4	3	3	3	3	3	3	3	3		Formální vzdělávání (kurzy, semináře) ke zvýšení odborné způsobilosti, Samostatné učení prostřednictvím zdrojů, jako jsou knihy, online kurzy nebo výzkum., Znalosti získané spoluprací s kolegy, podpůrným personálem nebo odborníky z jiných oborů	2.75
1	2	0	Magisterský titul	3-5 years	4	5	5	0.75	1	1	2	4	4	4	4	3	4	3	3	3	2	3	3	2	3	3	2	2	2	2	2	2	3	2	2	2	2	2	2	2	2	2	2	2	2	2	Časová omezení	Znalosti získané spoluprací s kolegy, podpůrným personálem nebo odborníky z jiných oborů	3.5
1	2	0	Magisterský titul	Less than 1 year	5	5	5	1	1	1	4	3	4	2	2	2	3	3	3	3	3	2	3	1	4	4	1	4	1	1	4	3	4	3	4	4	1	4	3	3	1	4	4	4	4	2	Časová omezení, Odpor kolegů nebo vzdělávací instituce	Znalosti získané v rámci studijních programů, Formální vzdělávání (kurzy, semináře) ke zvýšení odborné způsobilosti, Samostatné učení prostřednictvím zdrojů, jako jsou knihy, online kurzy nebo výzkum.	3.25
1	2	0	Středoškolské vzdělání (úroveň 1)	1-2 years	5	4	4	1	0.75	0.75	2	4	3	2	2	3	3	2	3	2	2	1	3	1	3	2	1	1	2	1	3	3	3	3	4	4	1	2	3	3	2	1	4	2	1	2	Omezené znalosti nebo možnosti školení, Časová omezení	Znalosti získané v rámci studijních programů, Samostatné učení prostřednictvím zdrojů, jako jsou knihy, online kurzy nebo výzkum.	2.75
2	2	0	Bakalářský titul	1-2 years	5	4	4	1	0.75	0.75	3	3	3	3	3	2	4	4	3	3	3	2	3	3	3	3	2	3	3	3	3	3	3	3	3	3	3	3	3	3	3	2	3	2	2	3	Odpor kolegů nebo vzdělávací instituce	Formální vzdělávání (kurzy, semináře) pro zvýšení odborné způsobilosti	3
1	2	1	Středoškolské vzdělání (úroveň 1)	More then 10 years	5	4	4	1	0.75	0.75	3	3	3	2	3	4	3	3	3	2	2	2	3	2	2	1	1	2	1	1	2	3	3	3	3	2	2	3	3	3	2	3	3	2	2	2	Časová omezení	Formální vzdělávání (kurzy, semináře) ke zvýšení odborné způsobilosti	2.75
2	2	0	Bakalářský titul	Less than 1 year	4	5	4	0.75	1	0.75	3	4	4	3	4	4	4	4	4	3	3	4	4	3	4	4	4	3	2	2	4	3	3	2	3	2	4	4	3	3	3	4	4	2	4	3	Omezené znalosti nebo možnosti školení	Formální vzdělávání (kurzy, semináře) pro zvýšení odborné způsobilosti	3.5
1	2	0	V současné době pokračuji v získávání kvalifikace předškolní pedagog, Bakalářský titul	Less than 1 year	5	5	4	1	1	0.75	2	2	3	1	3	3	3	3	2	2	2	2	3	2	3	2	1	3	1	1	2	3	3	2	3	3	1	3	3	2	1	2	3	2	2	2	Omezené znalosti nebo možnosti školení, Časová omezení	Samostatné učení prostřednictvím zdrojů, jako jsou knihy, online kurzy nebo výzkum.	2
2	2	0	Bakalářský titul	Less than 1 year	5	5	4	1	1	0.75	3	3	3	4	3	3	3	3	3	3	3	3	3	2	3	2	2	3	2	2	3	3	3	2	2	3	3	3	3	3	3	3	3	3	2	3	Omezené znalosti nebo možnosti školení	Znalosti získané spoluprací s kolegy, podpůrným personálem nebo odborníky z jiných oborů	3.25
2	2	0	Bakalářský titul	Less than 1 year	5	4	5	1	0.75	1	4	4	4	4	4	4	4	4	4	4	3	4	4	4	4	4	3	4	3	4	3	4	4	4	4	4	4	4	4	4	2	3	4	4	4	4	Omezené znalosti nebo možnosti školení	Formální vzdělávání (kurzy, semináře) pro zvýšení odborné způsobilosti	4
1	2	0	Bakalářský titul	1-2 years	5	3	4	1	0.5	0.75	3	4	4	4	4	2	3	3	4	3	4	2	3	2	3	3	3	3	3	3	3	3	3	4	3	2	3	3	3	3	3	4	4	3	3	3	Nedostatek zdrojů, Omezené znalosti nebo možnosti školení, Časová omezení, Odpor kolegů nebo vzdělávací instituce	Formální vzdělávání (kurzy, semináře) ke zvýšení odborné způsobilosti, Samostatné učení prostřednictvím zdrojů, jako jsou knihy, online kurzy nebo výzkum.	3.75
2	2	0	Bakalářský titul	Less than 1 year	5	5	5	1	1	1	4	4	4	4	4	4	4	4	4	4	4	4	3	3	3	4	3	3	3	3	3	3	3	3	3	4	4	3	3	3	3	4	4	4	4	4	Odpor kolegů nebo vzdělávací instituce	Formální vzdělávání (kurzy, semináře) pro zvýšení odborné způsobilosti	4
1	2	0	Bakalářský titul	3-5 years	4	3	3	0.75	0.5	0.5	2	3	3	2	2	2	3	3	2	2	2	2	2	1	2	2	2	2	2	2	2	2	3	3	3	2	2	2	3	2	2	2	2	2	2	2	Nedostatek zdrojů, Omezené znalosti nebo možnosti školení, Časová omezení	Formální vzdělávání (kurzy, semináře) ke zvýšení odborné způsobilosti, Znalosti získané spoluprací s kolegy, podpůrným personálem nebo odborníky z jiných oborů	2.5
1	2	0	Bakalářský titul	1-2 years	5	5	5	1	1	1	3	3	3	3	2	2	4	3	4	2	2	1	2	1	4	2	1	2	2	2	2	3	3	3	3	2	1	2	4	3	1	2	3	3	2	2	Omezené znalosti nebo možnosti školení	Žádné relevantní znalosti	3
1	2	0	V současné době pokračuji v získávání kvalifikace předškolní pedagog, Kvalifikace Chůva pro děti v dětské skupině, Bakalářský titul	More then 10 years	5	2	4	1	0.25	0.75	4	4	4	2	2	4	4	3	4	2	4	2	2	1	2	4	1	4	2	4	3	4	3	2	2	3	2	2	3	4	2	2	2	2	2	2	Nedostatek zdrojů, Časová omezení, Odpor kolegů nebo vzdělávací instituce	Znalosti získané v rámci studijních programů, Samostatné učení prostřednictvím zdrojů, jako jsou knihy, online kurzy nebo výzkum.	3.5
1	2	0	Středoškolské vzdělání (úroveň 1)	1-2 years	5	5	5	1	1	1	4	3	4	4	4	2	2	3	4	4	4	2	4	1	2	3	3	3	2	2	3	4	2	2	4	2	3	2	3	3	2	3	4	3	4	4			3.75
1	2	0	Vyšší odborné vzdělání (úroveň 2)	3-5 years	4	4	3	0.75	0.75	0.5	2	2	2	2	2	2	3	3	3	3	3	3	3	2	2	2	1	2	2	2	1	1	2	2	3	2	2	3	3	2	2	2	3	3	2	4	Nedostatek zdrojů, Časová omezení	Samostatné učení prostřednictvím zdrojů, jako jsou knihy, online kurzy nebo výzkum.	2
1	2	0	Kvalifikace Chůva pro děti v dětské skupině, Středoškolské vzdělání (úroveň 1)	1-2 years	5	4	4	1	0.75	0.75	2	3	3	1	3	2	2	3	3	3	2	3	3	2	4	4	2	4	3	1	3	4	3	4	4	3	1	3	3	3	3	2	4	3	2	2	Časová omezení		2.25
2	2	0	Bakalářský titul	3-5 years	5	4	5	1	0.75	1	2	3	4	3	2	4	3	4	3	2	4	3	3	1	2	2	2	3	2	2	2	3	4	2	1	4	1	2	3	4	4	3	4	4	3	2	Omezené znalosti nebo možnosti školení	Znalosti získané spoluprací s kolegy, podpůrným personálem nebo odborníky z jiných oborů	3
2	2	0	V současné době pokračuji v získávání kvalifikace předškolní pedagog, Středoškolské vzdělání (úroveň 1)	No experience	5	5	5	1	1	1	4	4	4	4	4	4	4	4	4	4	4	3	4	4	4	4	4	4	4	4	4	4	4	3	4	4	4	4	4	3	3	4	4	4	3	4	Odpor kolegů nebo vzdělávací instituce	Formální vzdělávání (kurzy, semináře) pro zvýšení odborné způsobilosti	4
1	2	0	Bakalářský titul	More then 10 years	5	5	4	1	1	0.75	3	3	4	3	2	3	3	3	4	2	3	2	2	2	2	3	2	2	1	2	3	2	2	2	3	4	2	3	2	4	1	3	4	2	3	2	Časová omezení	Znalosti získané spoluprací s kolegy, podpůrným personálem nebo odborníky z jiných oborů	3.25
2	2	0	V současné době pokračuji v získávání kvalifikace předškolní pedagog, Středoškolské vzdělání (úroveň 1)	No experience	5	4	4	1	0.75	0.75	4	3	3	3	4	4	3	2	4	2	3	3	4	2	2	4	2	2	1	2	3	4	4	3	3	4	3	3	3	4	2	2	4	3	3	2	Časová omezení	Znalosti získané spoluprací s kolegy, podpůrným personálem nebo odborníky z jiných oborů	3.25
1	2	0	Bakalářský titul	More then 10 years	5	2	2	1	0.25	0.25	3	4	3	2	3	3	3	4	4	2	3	2	3	2	3	3	1	3	3	2	2	3	3	3	4	3	2	4	4	4	4	3	4	2	3	4	Časová omezení, Odpor kolegů nebo vzdělávací instituce	Formální vzdělávání (kurzy, semináře) ke zvýšení odborné způsobilosti, Samostatné učení prostřednictvím zdrojů, jako jsou knihy, online kurzy nebo výzkum., Konzultacemi a podporou ze strany SPC	3
1	2	0	V současné době pokračuji v získávání kvalifikace předškolní pedagog, Bakalářský titul	Less than 1 year	5	5	5	1	1	1	2	3	4	4	3	4	4	4	4	3	4	1	2	4	4	3	1	3	1	1	3	3	4	4	4	3	2	3	4	4	2	2	4	4	2	3	Časová omezení	Znalosti získané v rámci studijních programů, Znalosti získané spoluprací s kolegy, podpůrným personálem nebo odborníky z jiných oborů	3.25
2	2	0	Bakalářský titul	1-2 years	5	4	5	1	0.75	1	2	3	2	1	2	3	3	3	2	2	2	2	3	2	2	2	2	2	2	3	2	2	2	2	3	3	2	3	3	2	2	3	3	3	2	3	Časová omezení	Formální vzdělávání (kurzy, semináře) pro zvýšení odborné způsobilosti	2
2	2	0	V současné době pokračuji v získávání kvalifikace předškolní pedagog, Středoškolské vzdělání (úroveň 1)	No experience	5	5	5	1	1	1	3	4	4	3	3	4	4	3	3	3	3	2	3	2	3	3	2	3	3	3	2	3	3	3	3	4	3	4	4	3	3	3	3	2	3	3	Omezené znalosti nebo možnosti školení	Formální vzdělávání (kurzy, semináře) pro zvýšení odborné způsobilosti	3.5
1	2	0	V současné době pokračuji v získávání kvalifikace předškolní pedagog, Bakalářský titul	Less than 1 year	5	4	4	1	0.75	0.75	2	3	3	1	3	3	3	2	4	3	4	3	3	1	3	1	1	2	1	1	3	2	3	2	2	1	1	1	2	2	1	2	3	3	2	1	Omezené znalosti nebo možnosti školení, Časová omezení, Odpor kolegů nebo vzdělávací instituce	Znalosti získané v rámci studijních programů	2.25
1	2	0	V současné době pokračuji v získávání kvalifikace předškolní pedagog, Bakalářský titul	6 - 10 years	5	5	5	1	1	1	3	4	3	2	4	4	4	2	3	3	4	3	3	2	3	3	2	3	1	1	3	4	3	2	4	2	3	3	3	2	2	3	3	3	3	2	Omezené znalosti nebo možnosti školení, Časová omezení	Znalosti získané v rámci studijních programů, Formální vzdělávání (kurzy, semináře) ke zvýšení odborné způsobilosti, Samostatné učení prostřednictvím zdrojů, jako jsou knihy, online kurzy nebo výzkum., Znalosti získané spoluprací s kolegy, podpůrným personálem nebo odborníky z jiných oborů	3
2	2	0	V současné době pokračuji v získávání kvalifikace předškolní pedagog, Středoškolské vzdělání (úroveň 1)	1-2 years	5	4	4	1	0.75	0.75	2	4	3	4	3	4	4	3	4	3	4	2	3	2	2	2	1	2	3	2	2	2	3	3	4	3	2	3	4	2	2	3	2	2	1	2	Omezené znalosti nebo možnosti školení	Znalosti získané v rámci studijních programů	3.25
1	2	0	Bakalářský titul	6 - 10 years	5	5	5	1	1	1	3	4	4	3	3	3	3	3	4	3	3	3	3	3	3	3	3	3	3	3	3	3	3	3	3	4	3	4	4	4	4	3	3	3	3	3	Odpor kolegů nebo vzdělávací instituce	Znalosti získané v rámci studijních programů, Formální vzdělávání (kurzy, semináře) ke zvýšení odborné způsobilosti, Samostatné učení prostřednictvím zdrojů, jako jsou knihy, online kurzy nebo výzkum.	3.5
2	2	0	Středoškolské vzdělání (úroveň 1)	No experience	5	4	4	1	0.75	0.75	3	2	3	3	4	3	3	3	3	4	4	4	3	3	4	2	3	4	3	4	3	2	3	3	3	4	2	3	4	3	3	3	2	2	3	3	Časová omezení	Formální vzdělávání (kurzy, semináře) pro zvýšení odborné způsobilosti	2.75
2	2	0	V současné době pokračuji v získávání kvalifikace předškolní pedagog, Středoškolské vzdělání (úroveň 1)	1-2 years	5	5	5	1	1	1	4	2	4	4	4	4	3	3	4	4	4	2	2	2	3	2	3	4	2	1	2	1	4	4	4	4	2	4	4	3	2	3	2	2	1	3	Časová omezení	Znalosti získané spoluprací s kolegy, podpůrným personálem nebo odborníky z jiných oborů	3.5
2	2	0	V současné době pokračuji v získávání kvalifikace předškolní pedagog	Less than 1 year	5	5	5	1	1	1	3	4	4	4	3	4	4	4	4	3	3	4	4	4	3	4	3	4	4	4	4	4	4	4	4	4	4	4	4	4	4	4	4	4	4	4	Odpor kolegů nebo vzdělávací instituce	Formální vzdělávání (kurzy, semináře) pro zvýšení odborné způsobilosti	3.75
1	2	0	Magisterský titul	6 - 10 years	4	4	4	0.75	0.75	0.75	3	3	3	3	2	3	3	2	3	3	3	3	3	2	3	3	3	3	3	3	3	3	3	3	3	2	3	3	3	3	3	2	3	3	3	3	Časová omezení	Znalosti získané v rámci studijních programů, Samostatné učení prostřednictvím zdrojů, jako jsou knihy, online kurzy nebo výzkum.	3
2	2	1	Bakalářský titul	3-5 years	4	4	3	0.75	0.75	0.5	3	3	2	1	2	3	3	3	3	3	3	2	3	2	3	3	2	3	3	3	2	3	3	2	3	3	2	3	3	3	3	2	3	3	2	3	Nedostatek zdrojů	Znalosti získané spoluprací s kolegy, podpůrným personálem nebo odborníky z jiných oborů	2.25
2	2	0	V současné době pokračuji v získávání kvalifikace předškolní pedagog	3-5 years	4	4	4	0.75	0.75	0.75	4	4	4	4	4	4	4	4	4	4	3	3	4	2	2	3	2	3	2	2	3	2	3	2	3	4	2	3	4	3	2	3	2	3	2	3	Omezené znalosti nebo možnosti školení	Formální vzdělávání (kurzy, semináře) pro zvýšení odborné způsobilosti	4
1	2	0	Bakalářský titul	Less than 1 year	5	4	4	1	0.75	0.75	3	4	4	4	4	4	3	3	4	2	3	3	3	2	3	3	1	2	1	1	1	3	3	3	3	2	2	3	3	3	2	2	2	2	2	2	Omezené znalosti nebo možnosti školení, Časová omezení	Znalosti získané v rámci studijních programů, Samostatné učení prostřednictvím zdrojů, jako jsou knihy, online kurzy nebo výzkum., Znalosti získané spoluprací s kolegy, podpůrným personálem nebo odborníky z jiných oborů	3.75
2	2	0	V současné době pokračuji v získávání kvalifikace předškolní pedagog, Středoškolské vzdělání (úroveň 1)	Less than 1 year	4	5	3	0.75	1	0.5	2	3	4	3	3	3	4	4	4	3	3	2	3	3	2	2	2	2	2	3	3	2	3	3	2	3	3	3	3	4	3	2	2	3	3	2	Nedostatek zdrojů	Formální vzdělávání (kurzy, semináře) pro zvýšení odborné způsobilosti	3
2	2	0	Středoškolské vzdělání (úroveň 1)	3-5 years	5	3	4	1	0.5	0.75	3	3	4	3	3	4	3	3	3	2	3	3	2	4	4	3	4	3	2	2	4	3	3	3	4	4	3	3	4	3	2	4	3	4	3	4	Časová omezení	Formální vzdělávání (kurzy, semináře) pro zvýšení odborné způsobilosti	3.25
2	2	0	Středoškolské vzdělání (úroveň 1)	Less than 1 year	5	5	5	1	1	1	3	4	3	4	4	2	3	4	4	2	4	4	4	1	3	3	1	2	3	4	2	2	2	3	2	4	3	2	4	2	2	3	2	2	2	4	Omezené znalosti nebo možnosti školení	Formální vzdělávání (kurzy, semináře) pro zvýšení odborné způsobilosti	3.5
1	2	0	Magisterský titul	3-5 years	4	5	3	0.75	1	0.5	3	4	4	4	4	4	2	4	4	3	4	3	4	3	3	2	4	4	3	3	3	3	3	3	3	3	2	3	2	3	3	3	3	3	2	3	Časová omezení	Znalosti získané v rámci studijních programů, Formální vzdělávání (kurzy, semináře) ke zvýšení odborné způsobilosti, Samostatné učení prostřednictvím zdrojů, jako jsou knihy, online kurzy nebo výzkum., Znalosti získané spoluprací s kolegy, podpůrným personálem nebo odborníky z jiných oborů	3.75
2	2	0	Středoškolské vzdělání (úroveň 1)	No experience	5	5	5	1	1	1	3	3	3	3	2	4	4	3	4	3	3	2	2	2	3	3	2	2	2	2	3	3	3	2	3	3	3	4	3	3	2	3	2	2	2	3	Nedostatek zdrojů	Samostatné učení prostřednictvím zdrojů, jako jsou knihy, online kurzy nebo výzkum	3
2	2	0	V současné době pokračuji v získávání kvalifikace předškolní pedagog	Less than 1 year	5	5	5	1	1	1	3	3	3	3	3	4	3	3	3	4	3	3	3	3	3	3	3	3	3	4	3	3	3	3	3	3	3	3	3	3	3	3	3	3	3	3	Časová omezení	Znalosti získané spoluprací s kolegy, podpůrným personálem nebo odborníky z jiných oborů	3
2	2	0	V současné době pokračuji v získávání kvalifikace předškolní pedagog	Less than 1 year	4	4	5	0.75	0.75	1	4	3	4	4	2	4	3	3	4	3	2	3	2	2	4	2	3	3	3	1	1	2	2	3	3	3	3	4	3	2	3	4	4	4	4	2	Omezené znalosti nebo možnosti školení	Znalosti získané v rámci studijních programů	3.75
2	2	0	Magisterský titul	No experience	5	5	5	1	1	1	3	4	4	3	4	4	3	4	4	3	3	3	3	3	3	4	2	2	2	2	3	4	4	3	3	3	2	3	4	3	3	3	3	3	3	3	Časová omezení	Znalosti získané spoluprací s kolegy, podpůrným personálem nebo odborníky z jiných oborů	3.5
2	2	0	V současné době pokračuji v získávání kvalifikace předškolní pedagog	Less than 1 year	5	5	5	1	1	1	4	3	4	4	4	4	4	4	4	3	4	3	3	3	3	3	3	3	3	3	3	4	4	4	4	3	3	4	4	3	3	4	3	4	3	3	Odpor kolegů nebo vzdělávací instituce	Formální vzdělávání (kurzy, semináře) pro zvýšení odborné způsobilosti	3.75
1	3	0	Bakalaura grāds	More then 10 years	4	4	4	0.75	0.75	0.75	3	4	3	3	4	4	4	3	4	3	3	2	3	3	3	3	2	3	3	4	3	3	3	3	4	3	3	4	4	4	4	4	4	4	2	3	Laika ierobežojums	Zināšanas, kas iegūtas studiju ietvaros, Formāla izglītība (kursi, diplomi) par profesionālās kompetences pilnveidi, Patstāvīgi apgūtas zināšanas, izmantojot resursus, piemēram, grāmatas, tiešsaistes kursus vai pētījumus.	3.25
1	3	0	Maģistra grāds	Less than 1 year	5	5	5	1	1	1	3	4	4	3	3	3	4	3	4	3	3	3	4	4	4	4	3	3	4	4	3	3	4	4	4	3	3	4	4	3	4	3	4	3	3	4	Resursu trūkums	Zināšanas, kas iegūtas studiju ietvaros, Patstāvīgi apgūtas zināšanas, izmantojot resursus, piemēram, grāmatas, tiešsaistes kursus vai pētījumus.	3.5
1	3	0	Pašlaik iegūst kvalifikāciju	Less than 1 year	5	5	5	1	1	1	4	4	3	4	4	4	4	4	4	3	4	3	4	3	3	2	3	3	3	2	3	4	4	3	3	3	2	3	3	2	2	4	4	3	3	3	Ierobežotas zināšanas vai apmācību iespējas	Patstāvīgi apgūtas zināšanas, izmantojot resursus, piemēram, grāmatas, tiešsaistes kursus vai pētījumus.	3.75
1	3	0	Profesionālā augstākā izglītība (1. līmenis)	3-5 years	5	5	5	1	1	1	4	4	4	3	4	3	4	3	4	4	3	2	4	4	3	4	4	4	3	2	4	4	4	3	4	1	1	4	4	4	4	2	2	4	3	2	Resursu trūkums, Ierobežotas zināšanas vai apmācību iespējas	Zināšanas, kas iegūtas studiju ietvaros	3.75
1	3	0	Bakalaura grāds	More then 10 years	4	5	5	0.75	1	1	3	3	3	2	4	3	3	2	4	3	2	1	2	2	3	2	2	2	1	1	2	2	3	2	3	2	1	3	4	3	3	3	2	2	2	2	Resursu trūkums, Ierobežotas zināšanas vai apmācību iespējas, Laika ierobežojums	Formāla izglītība (kursi, diplomi) par profesionālās kompetences pilnveidi	2.75
1	3	0	Bakalaura grāds	More then 10 years	5	5	5	1	1	1	3	4	3	4	4	4	3	3	3	4	4	2	3	3	3	3	3	3	3	2	3	3	3	3	3	3	2	3	3	3	3	3	3	3	2	3	Resursu trūkums, Ierobežotas zināšanas vai apmācību iespējas, Laika ierobežojums	Zināšanas, kas iegūtas studiju ietvaros, Formāla izglītība (kursi, diplomi) par profesionālās kompetences pilnveidi, Patstāvīgi apgūtas zināšanas, izmantojot resursus, piemēram, grāmatas, tiešsaistes kursus vai pētījumus.	3.5
1	3	0	Profesionālā augstākā izglītība (1. līmenis)	3-5 years	4	4	4	0.75	0.75	0.75	3	3	3	3	2	3	2	3	3	3	2	2	2	4	4	3	3	3	3	3	3	3	3	4	4	3	4	3	3	3	3	2	3	3	3	3	Resursu trūkums, Laika ierobežojums	Zināšanas, kas iegūtas studiju ietvaros, Formāla izglītība (kursi, diplomi) par profesionālās kompetences pilnveidi, Patstāvīgi apgūtas zināšanas, izmantojot resursus, piemēram, grāmatas, tiešsaistes kursus vai pētījumus., Zināšanas, kas gūtas sadarbībā ar kolēģiem, atbalsta personālu vai citu nozaru profesionāļiem	3
1	3	0	Profesionālā augstākā izglītība (1. līmenis)	6 - 10 years	5	5	5	1	1	1	4	4	4	4	4	4	4	4	4	4	4	3	3	4	4	3	3	4	4	4	4	4	4	4	4	4	3	4	4	4	4	4	3	4	4	4	Resursu trūkums	Zināšanas, kas gūtas sadarbībā ar kolēģiem, atbalsta personālu vai citu nozaru profesionāļiem	4
1	3	0	Maģistra grāds	More then 10 years	5	5	5	1	1	1	3	3	3	2	3	3	3	2	2	2	3	4	2	1	3	2	1	3	2	1	3	2	3	2	2	1	1	2	2	3	1	2	3	2	4	2	Resursu trūkums, Laika ierobežojums	Atbilstošu zināšanu nav	2.75
1	3	0	Maģistra grāds	More then 10 years	5	5	5	1	1	1	3	4	4	4	4	4	3	3	4	3	4	3	3	4	4	3	4	4	3	3	4	4	4	3	4	3	2	4	4	4	3	2	2	3	3	3	Laika ierobežojums	Patstāvīgi apgūtas zināšanas, izmantojot resursus, piemēram, grāmatas, tiešsaistes kursus vai pētījumus., Zināšanas, kas gūtas sadarbībā ar kolēģiem, atbalsta personālu vai citu nozaru profesionāļiem	3.75
1	3	0	Bakalaura grāds	More then 10 years	5	4	4	1	0.75	0.75	4	4	4	4	4	4	3	3	4	4	4	3	3	4	4	3	2	3	2	4	4	4	4	2	3	4	4	4	4	4	4	2	2	4	2	3	Resursu trūkums, Laika ierobežojums	Formāla izglītība (kursi, diplomi) par profesionālās kompetences pilnveidi, Patstāvīgi apgūtas zināšanas, izmantojot resursus, piemēram, grāmatas, tiešsaistes kursus vai pētījumus., Zināšanas, kas gūtas sadarbībā ar kolēģiem, atbalsta personālu vai citu nozaru profesionāļiem	4
1	3	0	Profesionālā augstākā izglītība (1. līmenis)	6 - 10 years	5	4	4	1	0.75	0.75	3	2	2	3	3	3	2	2	3	2	3	1	2	3	3	3	1	3	1	1	3	2	2	2	3	2	2	2	3	3	2	2	2	2	1	2	Resursu trūkums, Ierobežotas zināšanas vai apmācību iespējas, Laika ierobežojums, Pretestība no kolēģiem vai izglītības iestādes	Formāla izglītība (kursi, diplomi) par profesionālās kompetences pilnveidi, Zināšanas, kas gūtas sadarbībā ar kolēģiem, atbalsta personālu vai citu nozaru profesionāļiem	2.5
1	3	0	Bakalaura grāds	More then 10 years	5	5	5	1	1	1	3	4	3	4	4	4	4	3	4	2	3	2	2	4	3	3	2	3	3	2	2	2	3	3	3	3	4	4	4	4	4	3	3	3	3	3	Laika ierobežojums	Zināšanas, kas iegūtas studiju ietvaros, Formāla izglītība (kursi, diplomi) par profesionālās kompetences pilnveidi, Patstāvīgi apgūtas zināšanas, izmantojot resursus, piemēram, grāmatas, tiešsaistes kursus vai pētījumus., Zināšanas, kas gūtas sadarbībā ar kolēģiem, atbalsta personālu vai citu nozaru profesionāļiem	3.5
1	3	0	Profesionālā augstākā izglītība (1. līmenis)	1-2 years	4	4	4	0.75	0.75	0.75	3	3	3	3	2	2	2	2	2	2	2	2	2	2	2	2	2	2	2	2	2	2	2	2	2	2	2	2	2	2	2	2	2	2	2	2	Resursu trūkums, Laika ierobežojums	Zināšanas, kas iegūtas studiju ietvaros	3
1	3	0	Bakalaura grāds	More then 10 years	4	5	4	0.75	1	0.75	3	3	4	4	3	4	4	3	3	3	4	3	3	3	2	2	2	3	2	3	3	3	4	3	3	2	3	3	3	3	3	2	3	2	2	2	Resursu trūkums, Laika ierobežojums	Formāla izglītība (kursi, diplomi) par profesionālās kompetences pilnveidi, Patstāvīgi apgūtas zināšanas, izmantojot resursus, piemēram, grāmatas, tiešsaistes kursus vai pētījumus., Zināšanas, kas gūtas sadarbībā ar kolēģiem, atbalsta personālu vai citu nozaru profesionāļiem	3.5
1	3	0	Pašlaik iegūst kvalifikāciju	1-2 years	4	4	4	0.75	0.75	0.75	2	3	3	2	3	3	3	3	3	3	3	2	3	2	3	2	2	3	2	2	3	3	3	3	3	2	2	3	3	2	1	2	2	3	2	2	Resursu trūkums, Laika ierobežojums	Zināšanas, kas iegūtas studiju ietvaros, Formāla izglītība (kursi, diplomi) par profesionālās kompetences pilnveidi, Patstāvīgi apgūtas zināšanas, izmantojot resursus, piemēram, grāmatas, tiešsaistes kursus vai pētījumus., Zināšanas, kas gūtas sadarbībā ar kolēģiem, atbalsta personālu vai citu nozaru profesionāļiem	2.5
1	3	0	Maģistra grāds	More then 10 years	5	5	5	1	1	1	3	3	2	2	3	3	2	3	3	3	3	3	2	4	4	3	3	3	3	3	4	4	3	3	3	3	2	3	4	3	3	3	3	2	4	3	Resursu trūkums	Patstāvīgi apgūtas zināšanas, izmantojot resursus, piemēram, grāmatas, tiešsaistes kursus vai pētījumus., Zināšanas, kas gūtas sadarbībā ar kolēģiem, atbalsta personālu vai citu nozaru profesionāļiem	2.5
1	3	0	Bakalaura grāds	3-5 years	5	5	5	1	1	1	3	4	4	4	4	4	3	3	3	3	4	2	3	2	3	3	2	3	4	4	4	4	3	3	3	2	1	3	3	3	3	3	3	3	3	3	Resursu trūkums, Laika ierobežojums	Zināšanas, kas iegūtas studiju ietvaros, Formāla izglītība (kursi, diplomi) par profesionālās kompetences pilnveidi, Zināšanas, kas gūtas sadarbībā ar kolēģiem, atbalsta personālu vai citu nozaru profesionāļiem	3.75
1	3	0	Bakalaura grāds	More then 10 years	5	3	4	1	0.5	0.75	3	4	3	3	4	3	3	3	3	3	4	3	3	3	3	3	2	2	2	2	3	3	3	2	3	3	2	3	3	3	3	3	3	2	2	2	Resursu trūkums, Ierobežotas zināšanas vai apmācību iespējas, Laika ierobežojums	Formāla izglītība (kursi, diplomi) par profesionālās kompetences pilnveidi, Patstāvīgi apgūtas zināšanas, izmantojot resursus, piemēram, grāmatas, tiešsaistes kursus vai pētījumus.	3.25
1	3	0	Profesionālā augstākā izglītība (1. līmenis)	3-5 years	4	4	4	0.75	0.75	0.75	2	4	3	2	3	3	3	3	3	2	3	1	2	1	3	1	2	3	1	1	3	2	3	1	3	2	3	3	3	3	3	2	3	2	2	2	Resursu trūkums, Ierobežotas zināšanas vai apmācību iespējas, Pretestība no kolēģiem vai izglītības iestādes	Formāla izglītība (kursi, diplomi) par profesionālās kompetences pilnveidi, Patstāvīgi apgūtas zināšanas, izmantojot resursus, piemēram, grāmatas, tiešsaistes kursus vai pētījumus., Zināšanas, kas gūtas sadarbībā ar kolēģiem, atbalsta personālu vai citu nozaru profesionāļiem	2.75
1	3	0	Profesionālā augstākā izglītība (1. līmenis)	More then 10 years	5	5	5	1	1	1	3	3	3	2	4	4	3	3	3	2	2	2	3	2	2	2	2	3	2	2	3	2	3	2	4	2	1	4	4	3	2	3	3	3	3	2	Ierobežotas zināšanas vai apmācību iespējas, Laika ierobežojums	Formāla izglītība (kursi, diplomi) par profesionālās kompetences pilnveidi, Patstāvīgi apgūtas zināšanas, izmantojot resursus, piemēram, grāmatas, tiešsaistes kursus vai pētījumus., Zināšanas, kas gūtas sadarbībā ar kolēģiem, atbalsta personālu vai citu nozaru profesionāļiem	2.75
1	3	0	Profesionālā augstākā izglītība (2. līmenis)	More then 10 years	5	5	5	1	1	1	4	3	3	3	3	4	3	3	3	3	4	3	4	2	3	4	2	4	1	1	3	4	4	2	4	4	3	3	4	4	2	4	3	4	3	2	Resursu trūkums	Patstāvīgi apgūtas zināšanas, izmantojot resursus, piemēram, grāmatas, tiešsaistes kursus vai pētījumus., Zināšanas, kas gūtas sadarbībā ar kolēģiem, atbalsta personālu vai citu nozaru profesionāļiem	3.25
1	3	0	Maģistra grāds	More then 10 years	5	4	5	1	0.75	1	3	4	4	4	3	3	4	4	3	3	4	4	3	3	2	2	3	4	3	2	2	3	4	3	4	3	3	4	4	4	2	3	4	2	4	4	Laika ierobežojums	Zināšanas, kas gūtas sadarbībā ar kolēģiem, atbalsta personālu vai citu nozaru profesionāļiem	3.75
1	3	0	Bakalaura grāds	More then 10 years	5	4	4	1	0.75	0.75	2	3	3	2	2	4	3	2	3	3	3	1	2	1	3	1	3	4	2	4	3	3	3	4	4	3	2	3	3	4	2	3	2	3	2	2	Resursu trūkums	Atbilstošu zināšanu nav	2.5
1	3	0	Bakalaura grāds	More then 10 years	4	4	4	0.75	0.75	0.75	2	3	3	2	3	3	3	3	3	3	3	2	3	2	3	2	2	2	2	2	2	3	3	2	2	2	2	3	3	3	3	2	3	2	2	2	Resursu trūkums, Ierobežotas zināšanas vai apmācību iespējas	Atbilstošu zināšanu nav	2.5
1	3	0	Maģistra grāds	More then 10 years	4	5	4	0.75	1	0.75	2	3	4	4	3	3	2	2	3	3	3	2	3	2	2	2	2	3	2	2	2	3	3	3	3	3	2	3	3	2	2	3	2	2	2	2	Pretestība no kolēģiem vai izglītības iestādes	Patstāvīgi apgūtas zināšanas, izmantojot resursus, piemēram, grāmatas, tiešsaistes kursus vai pētījumus.	3.25
1	3	0	Bakalaura grāds	More then 10 years	5	5	5	1	1	1	4	4	4	2	3	3	3	4	3	4	3	3	3	2	2	2	3	3	3	3	3	2	2	2	2	2	2	2	2	2	2	2	2	2	2	2	Resursu trūkums	Formāla izglītība (kursi, diplomi) par profesionālās kompetences pilnveidi, Patstāvīgi apgūtas zināšanas, izmantojot resursus, piemēram, grāmatas, tiešsaistes kursus vai pētījumus., Zināšanas, kas gūtas sadarbībā ar kolēģiem, atbalsta personālu vai citu nozaru profesionāļiem	3.5
1	3	0	Bakalaura grāds	More then 10 years	4	4	4	0.75	0.75	0.75	3	3	4	3	4	4	4	3	4	4	4	4	4	3	3	2	2	3	2	2	2	3	3	3	3	2	2	3	3	3	3	2	3	3	2	3	Resursu trūkums, Ierobežotas zināšanas vai apmācību iespējas, Laika ierobežojums	Zināšanas, kas iegūtas studiju ietvaros, Formāla izglītība (kursi, diplomi) par profesionālās kompetences pilnveidi, Patstāvīgi apgūtas zināšanas, izmantojot resursus, piemēram, grāmatas, tiešsaistes kursus vai pētījumus., Zināšanas, kas gūtas sadarbībā ar kolēģiem, atbalsta personālu vai citu nozaru profesionāļiem	3.25
1	3	0	Profesionālā augstākā izglītība (1. līmenis)	6 - 10 years	5	4	5	1	0.75	1	3	3	3	4	4	3	2	3	4	3	4	2	2	3	3	2	4	4	2	2	2	2	3	2	3	2	2	2	3	3	2	2	3	3	3	4	Resursu trūkums, Laika ierobežojums	Zināšanas, kas iegūtas studiju ietvaros, Patstāvīgi apgūtas zināšanas, izmantojot resursus, piemēram, grāmatas, tiešsaistes kursus vai pētījumus.	3.25
1	3	0	Bakalaura grāds	6 - 10 years	5	5	4	1	1	0.75	2	2	3	3	4	2	4	2	2	4	4	1	2	4	4	4	4	2	2	2	2	4	3	3	4	3	3	2	4	3	3	2	3	2	2	3	Ierobežotas zināšanas vai apmācību iespējas, Laika ierobežojums	Zināšanas, kas iegūtas studiju ietvaros, Formāla izglītība (kursi, diplomi) par profesionālās kompetences pilnveidi, Zināšanas, kas gūtas sadarbībā ar kolēģiem, atbalsta personālu vai citu nozaru profesionāļiem	2.5
1	3	0	Bakalaura grāds	3-5 years	4	4	4	0.75	0.75	0.75	3	4	4	4	4	3	4	4	4	2	4	1	4	4	4	3	1	3	3	4	4	4	4	4	4	3	4	4	4	4	3	4	4	4	3	3	Resursu trūkums, Ierobežotas zināšanas vai apmācību iespējas, Laika ierobežojums	Formāla izglītība (kursi, diplomi) par profesionālās kompetences pilnveidi, Patstāvīgi apgūtas zināšanas, izmantojot resursus, piemēram, grāmatas, tiešsaistes kursus vai pētījumus., Zināšanas, kas gūtas sadarbībā ar kolēģiem, atbalsta personālu vai citu nozaru profesionāļiem	3.75
1	3	0	Profesionālā augstākā izglītība (1. līmenis)	3-5 years	4	4	5	0.75	0.75	1	2	2	3	1	2	3	3	3	4	4	4	1	1	3	3	3	1	3	1	3	4	1	4	4	4	3	1	2	4	3	3	4	4	3	3	4	Resursu trūkums, Ierobežotas zināšanas vai apmācību iespējas, Pretestība no kolēģiem vai izglītības iestādes	Zināšanas, kas iegūtas studiju ietvaros	2
1	3	0	Profesionālā augstākā izglītība (2. līmenis)	More then 10 years	5	5	5	1	1	1	4	4	4	4	4	4	3	4	4	4	3	3	3	4	4	4	2	4	4	4	4	4	4	4	4	4	3	2	3	3	2	3	4	3	3	3	Resursu trūkums, Laika ierobežojums	Patstāvīgi apgūtas zināšanas, izmantojot resursus, piemēram, grāmatas, tiešsaistes kursus vai pētījumus., Zināšanas, kas gūtas sadarbībā ar kolēģiem, atbalsta personālu vai citu nozaru profesionāļiem	4
1	3	0	Bakalaura grāds	6 - 10 years	5	5	5	1	1	1	3	3	3	1	3	3	3	3	4	2	3	1	3	1	2	2	2	2	1	2	2	2	3	1	2	1	1	3	4	3	3	2	3	2	4	2	Resursu trūkums, Ierobežotas zināšanas vai apmācību iespējas, Laika ierobežojums	Formāla izglītība (kursi, diplomi) par profesionālās kompetences pilnveidi, Zināšanas, kas gūtas sadarbībā ar kolēģiem, atbalsta personālu vai citu nozaru profesionāļiem	2.5
1	3	0	Bakalaura grāds	More then 10 years	5	5	5	1	1	1	3	3	4	3	4	4	3	3	4	3	3	3	3	3	3	2	3	3	2	3	3	3	3	3	3	2	2	3	4	4	4	4	3	3	3	2	Laika ierobežojums	Zināšanas, kas iegūtas studiju ietvaros, Formāla izglītība (kursi, diplomi) par profesionālās kompetences pilnveidi, Patstāvīgi apgūtas zināšanas, izmantojot resursus, piemēram, grāmatas, tiešsaistes kursus vai pētījumus.	3.25
1	3	0	Profesionālā augstākā izglītība (2. līmenis)	More then 10 years	5	4	4	1	0.75	0.75	3	3	3	3	3	3	3	3	3	3	3	3	3	3	3	2	2	3	2	2	2	2	2	2	3	2	1	3	3	2	2	3	2	2	2	2	Laika ierobežojums	Formāla izglītība (kursi, diplomi) par profesionālās kompetences pilnveidi, Patstāvīgi apgūtas zināšanas, izmantojot resursus, piemēram, grāmatas, tiešsaistes kursus vai pētījumus., Zināšanas, kas gūtas sadarbībā ar kolēģiem, atbalsta personālu vai citu nozaru profesionāļiem	3
1	3	0	Maģistra grāds	More then 10 years	5	5	5	1	1	1	3	3	2	3	3	4	4	3	4	3	4	2	3	2	3	3	2	3	2	2	2	3	3	3	4	2	3	3	3	2	2	3	3	3	2	3	Resursu trūkums, Laika ierobežojums	Formāla izglītība (kursi, diplomi) par profesionālās kompetences pilnveidi, Patstāvīgi apgūtas zināšanas, izmantojot resursus, piemēram, grāmatas, tiešsaistes kursus vai pētījumus., Zināšanas, kas gūtas sadarbībā ar kolēģiem, atbalsta personālu vai citu nozaru profesionāļiem	2.75
1	3	0	Bakalaura grāds	More then 10 years	5	5	5	1	1	1	4	4	4	4	4	4	4	4	4	4	4	3	3	4	3	3	4	3	2	2	2	2	3	3	3	3	2	4	4	4	4	3	2	2	4	3	Laika ierobežojums	Zināšanas, kas iegūtas studiju ietvaros	4
1	3	0	Profesionālā augstākā izglītība (1. līmenis)	6 - 10 years	5	4	4	1	0.75	0.75	3	4	3	1	3	3	2	3	4	2	2	1	3	3	4	2	1	4	1	1	2	3	3	3	4	3	1	3	4	3	3	3	3	4	2	3	Resursu trūkums, Ierobežotas zināšanas vai apmācību iespējas	Zināšanas, kas iegūtas studiju ietvaros, Patstāvīgi apgūtas zināšanas, izmantojot resursus, piemēram, grāmatas, tiešsaistes kursus vai pētījumus., Zināšanas, kas gūtas sadarbībā ar kolēģiem, atbalsta personālu vai citu nozaru profesionāļiem	2.75
1	3	0	Bakalaura grāds	More then 10 years	5	5	5	1	1	1	3	3	3	3	3	2	2	2	3	3	3	2	3	3	3	2	2	4	2	2	4	4	4	3	3	3	2	4	4	4	3	3	3	4	2	3	Atbalsta personāla trūkums	Zināšanas, kas iegūtas studiju ietvaros, Formāla izglītība (kursi, diplomi) par profesionālās kompetences pilnveidi, Patstāvīgi apgūtas zināšanas, izmantojot resursus, piemēram, grāmatas, tiešsaistes kursus vai pētījumus., Zināšanas, kas gūtas sadarbībā ar kolēģiem, atbalsta personālu vai citu nozaru profesionāļiem	3
1	3	0	Bakalaura grāds	More then 10 years	5	5	5	1	1	1	3	3	4	4	4	4	4	4	3	4	4	3	4	4	4	4	1	2	1	1	2	3	3	3	3	4	3	3	3	4	3	3	4	4	3	4	Laika ierobežojums	Patstāvīgi apgūtas zināšanas, izmantojot resursus, piemēram, grāmatas, tiešsaistes kursus vai pētījumus.	3.5
1	3	0	Bakalaura grāds	6 - 10 years	5	5	5	1	1	1	4	3	3	4	4	4	4	4	4	3	3	3	4	3	3	3	3	3	2	3	3	3	3	3	3	3	4	3	4	4	4	4	3	3	2	3	Laika ierobežojums	Zināšanas, kas iegūtas studiju ietvaros, Formāla izglītība (kursi, diplomi) par profesionālās kompetences pilnveidi, Patstāvīgi apgūtas zināšanas, izmantojot resursus, piemēram, grāmatas, tiešsaistes kursus vai pētījumus.	3.5
1	3	0	Maģistra grāds	More then 10 years	4	3	4	0.75	0.5	0.75	2	3	3	2	3	3	2	3	2	2	3	2	3	3	3	2	2	2	2	2	2	3	3	2	2	1	2	3	3	2	3	2	2	2	2	2	Ierobežotas zināšanas vai apmācību iespējas	Formāla izglītība (kursi, diplomi) par profesionālās kompetences pilnveidi	2.5
1	3	0	Bakalaura grāds	More then 10 years	5	5	5	1	1	1	3	3	4	3	3	4	3	2	3	3	3	1	3	2	4	2	3	4	1	1	4	4	4	2	3	4	1	4	4	3	3	3	3	2	2	2	Resursu trūkums, Ierobežotas zināšanas vai apmācību iespējas	Formāla izglītība (kursi, diplomi) par profesionālās kompetences pilnveidi, Zināšanas, kas gūtas sadarbībā ar kolēģiem, atbalsta personālu vai citu nozaru profesionāļiem	3.25
1	3	0	Profesionālā augstākā izglītība (2. līmenis)	More then 10 years	5	5	5	1	1	1	3	3	4	3	4	3	4	3	4	3	3	2	3	3	4	3	3	3	2	2	3	3	3	3	4	3	2	4	4	3	3	4	4	4	3	3	Laika ierobežojums	Zināšanas, kas iegūtas studiju ietvaros, Formāla izglītība (kursi, diplomi) par profesionālās kompetences pilnveidi, Patstāvīgi apgūtas zināšanas, izmantojot resursus, piemēram, grāmatas, tiešsaistes kursus vai pētījumus., Zināšanas, kas gūtas sadarbībā ar kolēģiem, atbalsta personālu vai citu nozaru profesionāļiem	3.25
1	3	0	Bakalaura grāds, Profesionālā augstākā izglītība (2. līmenis)	More then 10 years	5	5	5	1	1	1	3	3	3	2	3	3	2	3	3	3	3	2	2	1	3	2	2	3	2	1	2	3	4	2	4	1	1	2	2	3	2	3	2	3	2	2	Resursu trūkums, Laika ierobežojums	Patstāvīgi apgūtas zināšanas, izmantojot resursus, piemēram, grāmatas, tiešsaistes kursus vai pētījumus.	2.75
1	3	0	Profesionālā augstākā izglītība (2. līmenis)	More then 10 years	4	4	4	0.75	0.75	0.75	4	3	3	2	2	2	3	3	3	3	2	2	2	2	3	2	2	3	1	1	2	3	3	2	3	3	2	2	3	3	3	2	2	3	2	2	Resursu trūkums, Laika ierobežojums	Formāla izglītība (kursi, diplomi) par profesionālās kompetences pilnveidi, Patstāvīgi apgūtas zināšanas, izmantojot resursus, piemēram, grāmatas, tiešsaistes kursus vai pētījumus.	3
1	3	0	Bakalaura grāds	6 - 10 years	5	5	5	1	1	1	3	3	3	3	3	3	3	3	3	3	3	3	3	3	3	3	3	3	3	3	3	3	3	3	3	3	3	3	3	3	3	3	3	3	3	3	Resursu trūkums, Ierobežotas zināšanas vai apmācību iespējas	Zināšanas, kas iegūtas studiju ietvaros, Formāla izglītība (kursi, diplomi) par profesionālās kompetences pilnveidi, Patstāvīgi apgūtas zināšanas, izmantojot resursus, piemēram, grāmatas, tiešsaistes kursus vai pētījumus.	3
1	3	0	Pašlaik iegūst kvalifikāciju	1-2 years	4	4	4	0.75	0.75	0.75	2	3	3	3	3	2	2	3	3	3	3	2	3	3	3	3	2	2	2	3	2	2	3	3	3	2	1	2	3	2	3	2	2	3	3	2	Ierobežotas zināšanas vai apmācību iespējas	Atbilstošu zināšanu nav	2.75
1	3	0	Bakalaura grāds	More then 10 years	5	4	5	1	0.75	1	3	3	3	2	2	3	2	3	3	3	3	2	2	2	3	2	2	2	2	2	2	4	3	3	4	2	3	4	3	3	2	3	3	2	3	3	Resursu trūkums	Formāla izglītība (kursi, diplomi) par profesionālās kompetences pilnveidi, Zināšanas, kas gūtas sadarbībā ar kolēģiem, atbalsta personālu vai citu nozaru profesionāļiem	2.75
1	3	0	Bakalaura grāds	More then 10 years	4	4	4	0.75	0.75	0.75	3	3	3	3	2	2	3	3	3	4	4	4	4	3	3	3	3	3	3	3	3	3	3	3	3	2	3	2	3	4	4	4	3	3	4	4	Laika ierobežojums	Zināšanas, kas iegūtas studiju ietvaros, Formāla izglītība (kursi, diplomi) par profesionālās kompetences pilnveidi, Patstāvīgi apgūtas zināšanas, izmantojot resursus, piemēram, grāmatas, tiešsaistes kursus vai pētījumus.	3
1	3	0	Bakalaura grāds	More then 10 years	5	4	5	1	0.75	1	4	4	4	2	2	4	3	2	4	3	3	3	3	2	2	2	2	3	2	2	3	3	4	3	4	2	2	3	4	3	2	3	3	3	3	2	Ierobežotas zināšanas vai apmācību iespējas, Laika ierobežojums	Patstāvīgi apgūtas zināšanas, izmantojot resursus, piemēram, grāmatas, tiešsaistes kursus vai pētījumus., Zināšanas, kas gūtas sadarbībā ar kolēģiem, atbalsta personālu vai citu nozaru profesionāļiem	3.5
1	3	0	Maģistra grāds	More then 10 years	5	4	4	1	0.75	0.75	3	4	4	2	3	4	3	4	3	4	3	2	2	3	2	2	2	3	2	3	3	3	3	2	3	2	2	2	4	2	2	3	2	4	3	2	Resursu trūkums, Laika ierobežojums, Pretestība no kolēģiem vai izglītības iestādes	Zināšanas, kas iegūtas studiju ietvaros, Formāla izglītība (kursi, diplomi) par profesionālās kompetences pilnveidi, Zināšanas, kas gūtas sadarbībā ar kolēģiem, atbalsta personālu vai citu nozaru profesionāļiem	3.25
1	3	0	Bakalaura grāds	More then 10 years	5	4	3	1	0.75	0.5	3	2	3	3	3	2	3	2	3	3	3	2	2	3	3	2	2	3	2	2	3	2	3	3	3	3	1	4	4	3	4	3	2	3	2	3	Resursu trūkums, Laika ierobežojums	Zināšanas, kas iegūtas studiju ietvaros, Formāla izglītība (kursi, diplomi) par profesionālās kompetences pilnveidi, Patstāvīgi apgūtas zināšanas, izmantojot resursus, piemēram, grāmatas, tiešsaistes kursus vai pētījumus., Zināšanas, kas gūtas sadarbībā ar kolēģiem, atbalsta personālu vai citu nozaru profesionāļiem	2.75
1	3	0	Bakalaura grāds	More then 10 years	5	5	4	1	1	0.75	2	4	4	4	4	3	3	4	4	4	3	3	3	4	4	4	3	4	3	2	3	4	4	3	4	3	2	2	3	4	3	3	4	4	3	4	Laika ierobežojums	Zināšanas, kas gūtas sadarbībā ar kolēģiem, atbalsta personālu vai citu nozaru profesionāļiem	3.5
1	3	0	Profesionālā augstākā izglītība (1. līmenis), Bakalaura grāds	More then 10 years	5	5	5	1	1	1	4	4	4	4	4	4	4	4	4	4	4	3	4	4	4	4	3	3	1	1	4	4	4	4	3	3	1	4	4	4	4	4	4	3	3	3	Laika ierobežojums	Zināšanas, kas iegūtas studiju ietvaros, Formāla izglītība (kursi, diplomi) par profesionālās kompetences pilnveidi, Patstāvīgi apgūtas zināšanas, izmantojot resursus, piemēram, grāmatas, tiešsaistes kursus vai pētījumus., Zināšanas, kas gūtas sadarbībā ar kolēģiem, atbalsta personālu vai citu nozaru profesionāļiem	4
1	3	0	Bakalaura grāds	More then 10 years	4	4	4	0.75	0.75	0.75	3	3	2	1	3	3	3	3	2	4	2	2	3	1	2	2	1	4	2	2	1	4	4	3	3	3	1	3	3	3	3	2	3	3	1	1	Resursu trūkums, Laika ierobežojums	Formāla izglītība (kursi, diplomi) par profesionālās kompetences pilnveidi	2.25
1	3	0	Bakalaura grāds	More then 10 years	5	5	5	1	1	1	4	4	4	3	4	3	3	3	4	3	3	3	3	3	3	3	3	3	3	3	3	3	3	3	3	3	2	4	4	3	3	3	3	3	3	3	Resursu trūkums	Formāla izglītība (kursi, diplomi) par profesionālās kompetences pilnveidi, Patstāvīgi apgūtas zināšanas, izmantojot resursus, piemēram, grāmatas, tiešsaistes kursus vai pētījumus., Zināšanas, kas gūtas sadarbībā ar kolēģiem, atbalsta personālu vai citu nozaru profesionāļiem	3.75
1	3	0	Bakalaura grāds	More then 10 years	5	5	5	1	1	1	4	4	4	3	4	3	3	3	4	3	3	3	3	3	3	3	3	3	3	3	3	3	3	3	3	3	2	4	4	3	3	3	3	3	3	3	Resursu trūkums	Formāla izglītība (kursi, diplomi) par profesionālās kompetences pilnveidi, Patstāvīgi apgūtas zināšanas, izmantojot resursus, piemēram, grāmatas, tiešsaistes kursus vai pētījumus., Zināšanas, kas gūtas sadarbībā ar kolēģiem, atbalsta personālu vai citu nozaru profesionāļiem	3.75
1	3	0	Bakalaura grāds	More then 10 years	2	2	2	0.25	0.25	0.25	2	2	2	2	2	2	3	2	2	2	2	2	2	2	2	2	1	2	1	1	1	1	2	1	2	2	3	2	2	1	1	1	2	2	1	1	Resursu trūkums, Ierobežotas zināšanas vai apmācību iespējas, Laika ierobežojums	Atbilstošu zināšanu nav	2
1	3	0	Bakalaura grāds, Profesionālā augstākā izglītība (2. līmenis)	More then 10 years	5	5	5	1	1	1	4	3	4	4	4	3	3	3	4	3	3	2	2	3	3	2	2	3	2	2	2	2	3	2	3	3	3	3	3	3	3	2	3	3	3	2	Resursu trūkums	Zināšanas, kas iegūtas studiju ietvaros, Formāla izglītība (kursi, diplomi) par profesionālās kompetences pilnveidi, Patstāvīgi apgūtas zināšanas, izmantojot resursus, piemēram, grāmatas, tiešsaistes kursus vai pētījumus., Zināšanas, kas gūtas sadarbībā ar kolēģiem, atbalsta personālu vai citu nozaru profesionāļiem	3.75
1	3	0	Bakalaura grāds	More then 10 years	4	3	5	0.75	0.5	1	3	3	3	3	3	4	4	3	3	3	3	2	3	3	2	1	1	2	2	3	3	1	2	2	3	2	1	2	2	2	2	2	2	1	1	2	Resursu trūkums, Ierobežotas zināšanas vai apmācību iespējas, Laika ierobežojums	Patstāvīgi apgūtas zināšanas, izmantojot resursus, piemēram, grāmatas, tiešsaistes kursus vai pētījumus., Zināšanas, kas gūtas sadarbībā ar kolēģiem, atbalsta personālu vai citu nozaru profesionāļiem, Atbilstošu zināšanu nav	3
1	3	0	Pašlaik iegūst kvalifikāciju	1-2 years	4	4	4	0.75	0.75	0.75	3	3	2	2	2	3	2	2	3	2	3	1	2	3	3	3	2	3	2	2	2	3	3	2	3	3	2	3	2	2	2	2	2	2	1	2	Resursu trūkums, Ierobežotas zināšanas vai apmācību iespējas	Zināšanas, kas iegūtas studiju ietvaros	2.5
1	3	0	Pašlaik iegūst kvalifikāciju	Less than 1 year	5	5	5	1	1	1	3	4	3	3	2	4	4	4	4	4	4	4	4	4	4	3	3	4	2	2	3	3	3	3	3	3	2	3	4	3	3	4	2	4	4	3	Ierobežotas zināšanas vai apmācību iespējas	Zināšanas, kas gūtas sadarbībā ar kolēģiem, atbalsta personālu vai citu nozaru profesionāļiem	3.25
1	3	0	Maģistra grāds	More then 10 years	4	4	4	0.75	0.75	0.75	3	3	3	2	3	3	3	3	3	3	3	2	3	2	3	3	2	3	2	2	3	3	3	2	3	3	2	2	3	3	2	3	3	3	3	2	Resursu trūkums, Laika ierobežojums	Formāla izglītība (kursi, diplomi) par profesionālās kompetences pilnveidi, Patstāvīgi apgūtas zināšanas, izmantojot resursus, piemēram, grāmatas, tiešsaistes kursus vai pētījumus., Zināšanas, kas gūtas sadarbībā ar kolēģiem, atbalsta personālu vai citu nozaru profesionāļiem	2.75
1	3	0	Pašlaik iegūst kvalifikāciju	1-2 years	5	5	5	1	1	1	3	3	3	3	3	2	3	3	3	2	3	2	2	2	2	3	2	2	2	2	2	3	3	3	3	2	2	2	2	2	2	2	2	2	2	2	Laika ierobežojums, Pretestība no kolēģiem vai izglītības iestādes	Zināšanas, kas iegūtas studiju ietvaros, Patstāvīgi apgūtas zināšanas, izmantojot resursus, piemēram, grāmatas, tiešsaistes kursus vai pētījumus.	3
1	3	0	Bakalaura grāds	More then 10 years	4	4	4	0.75	0.75	0.75	2	4	4	2	3	4	3	3	3	4	4	2	3	3	3	3	3	3	3	2	3	2	3	3	3	2	2	4	3	2	3	3	3	3	2	3	Resursu trūkums, Ierobežotas zināšanas vai apmācību iespējas	Zināšanas, kas iegūtas studiju ietvaros, Formāla izglītība (kursi, diplomi) par profesionālās kompetences pilnveidi, Patstāvīgi apgūtas zināšanas, izmantojot resursus, piemēram, grāmatas, tiešsaistes kursus vai pētījumus., Zināšanas, kas gūtas sadarbībā ar kolēģiem, atbalsta personālu vai citu nozaru profesionāļiem	3
1	3	0	Bakalaura grāds, Profesionālā augstākā izglītība (2. līmenis)	6 - 10 years	3	3	3	0.5	0.5	0.5	3	4	3	3	2	3	3	3	3	3	2	2	3	2	3	3	3	3	2	2	2	2	3	2	3	2	3	3	3	2	2	2	2	2	2	2	Resursu trūkums, Ierobežotas zināšanas vai apmācību iespējas, Laika ierobežojums	Zināšanas, kas iegūtas studiju ietvaros, Formāla izglītība (kursi, diplomi) par profesionālās kompetences pilnveidi, Patstāvīgi apgūtas zināšanas, izmantojot resursus, piemēram, grāmatas, tiešsaistes kursus vai pētījumus., Zināšanas, kas gūtas sadarbībā ar kolēģiem, atbalsta personālu vai citu nozaru profesionāļiem	3.25
1	3	0	Profesionālā augstākā izglītība (1. līmenis)	More then 10 years	5	4	4	1	0.75	0.75	3	3	3	3	4	4	3	4	4	4	4	2	3	4	4	3	3	3	2	3	3	3	3	3	3	4	4	3	3	3	3	3	2	3	2	2	Resursu trūkums	Formāla izglītība (kursi, diplomi) par profesionālās kompetences pilnveidi, Patstāvīgi apgūtas zināšanas, izmantojot resursus, piemēram, grāmatas, tiešsaistes kursus vai pētījumus., Zināšanas, kas gūtas sadarbībā ar kolēģiem, atbalsta personālu vai citu nozaru profesionāļiem	3
1	3	0	Bakalaura grāds	More then 10 years	5	5	5	1	1	1	4	4	4	4	4	4	3	4	4	4	4	3	4	3	4	4	3	4	4	4	3	4	4	4	4	4	4	4	4	4	4	4	4	4	4	4	Laika ierobežojums	Zināšanas, kas iegūtas studiju ietvaros, Formāla izglītība (kursi, diplomi) par profesionālās kompetences pilnveidi, Patstāvīgi apgūtas zināšanas, izmantojot resursus, piemēram, grāmatas, tiešsaistes kursus vai pētījumus., Zināšanas, kas gūtas sadarbībā ar kolēģiem, atbalsta personālu vai citu nozaru profesionāļiem	4
1	3	0	Profesionālā augstākā izglītība (1. līmenis)	3-5 years	5	5	5	1	1	1	4	4	4	4	4	4	4	4	4	4	4	4	4	4	4	3	4	4	3	2	3	3	3	3	3	3	3	3	3	3	3	3	3	3	3	3	Resursu trūkums, Laika ierobežojums	Zināšanas, kas iegūtas studiju ietvaros, Patstāvīgi apgūtas zināšanas, izmantojot resursus, piemēram, grāmatas, tiešsaistes kursus vai pētījumus., Zināšanas, kas gūtas sadarbībā ar kolēģiem, atbalsta personālu vai citu nozaru profesionāļiem	4
1	3	0	Profesionālā augstākā izglītība (2. līmenis)	More then 10 years	5	5	5	1	1	1	4	4	4	4	4	4	4	4	4	2	3	3	3	3	4	3	3	4	3	3	4	3	3	3	2	4	4	4	4	4	3	4	4	4	3	3	Laika ierobežojums	Patstāvīgi apgūtas zināšanas, izmantojot resursus, piemēram, grāmatas, tiešsaistes kursus vai pētījumus.	4
1	3	0	Maģistra grāds	More then 10 years	5	5	5	1	1	1	3	4	4	4	3	3	3	3	3	3	3	3	3	3	3	3	4	4	4	4	4	3	4	3	4	3	3	4	4	4	4	3	3	4	4	4	Resursu trūkums	Zināšanas, kas iegūtas studiju ietvaros, Formāla izglītība (kursi, diplomi) par profesionālās kompetences pilnveidi, Zināšanas, kas gūtas sadarbībā ar kolēģiem, atbalsta personālu vai citu nozaru profesionāļiem	3.75
1	3	0	Bakalaura grāds	More then 10 years	5	5	5	1	1	1	4	4	4	3	4	4	3	4	4	4	3	4	3	3	3	3	2	3	2	2	3	3	3	3	3	3	2	2	4	3	3	3	2	3	2	3	Resursu trūkums	Zināšanas, kas iegūtas studiju ietvaros, Patstāvīgi apgūtas zināšanas, izmantojot resursus, piemēram, grāmatas, tiešsaistes kursus vai pētījumus.	3.75
1	3	0	Bakalaura grāds	More then 10 years	5	5	5	1	1	1	4	4	4	4	4	4	3	4	4	3	3	2	2	2	2	2	2	4	2	2	2	3	3	3	3	3	2	3	4	4	4	4	4	4	4	4	Resursu trūkums, Laika ierobežojums	Patstāvīgi apgūtas zināšanas, izmantojot resursus, piemēram, grāmatas, tiešsaistes kursus vai pētījumus.	4
1	3	0	Profesionālā augstākā izglītība (1. līmenis)	More then 10 years	5	5	5	1	1	1	4	3	3	2	4	4	3	4	4	4	2	1	3	1	4	2	4	4	2	2	4	3	3	3	4	2	1	3	3	4	2	2	2	2	2	1	Resursu trūkums, Laika ierobežojums, Pretestība no kolēģiem vai izglītības iestādes	Zināšanas, kas iegūtas studiju ietvaros, Formāla izglītība (kursi, diplomi) par profesionālās kompetences pilnveidi, Patstāvīgi apgūtas zināšanas, izmantojot resursus, piemēram, grāmatas, tiešsaistes kursus vai pētījumus., Zināšanas, kas gūtas sadarbībā ar kolēģiem, atbalsta personālu vai citu nozaru profesionāļiem	3
1	3	0	Profesionālā augstākā izglītība (1. līmenis)	More then 10 years	4	2	2	0.75	0.25	0.25	4	3	2	3	3	4	3	4	3	4	4	3	3	3	3	3	3	3	3	3	3	3	3	3	3	3	3	3	3	3	3	3	3	3	2	3	Resursu trūkums, Ierobežotas zināšanas vai apmācību iespējas, Laika ierobežojums	Zināšanas, kas iegūtas studiju ietvaros, Formāla izglītība (kursi, diplomi) par profesionālās kompetences pilnveidi, Patstāvīgi apgūtas zināšanas, izmantojot resursus, piemēram, grāmatas, tiešsaistes kursus vai pētījumus., Zināšanas, kas gūtas sadarbībā ar kolēģiem, atbalsta personālu vai citu nozaru profesionāļiem	3
1	3	0	Maģistra grāds	More then 10 years	4	4	4	0.75	0.75	0.75	3	3	3	3	3	3	3	3	3	3	3	3	3	3	3	3	3	3	3	3	3	3	3	3	3	3	3	3	3	3	3	3	3	3	3	3	Resursu trūkums, Ierobežotas zināšanas vai apmācību iespējas, Laika ierobežojums	Zināšanas, kas iegūtas studiju ietvaros, Formāla izglītība (kursi, diplomi) par profesionālās kompetences pilnveidi	3
1	3	0	Maģistra grāds	More then 10 years	5	5	5	1	1	1	3	4	3	3	3	3	3	3	4	3	4	3	3	4	4	4	3	4	3	3	4	4	3	3	3	3	2	3	4	3	2	3	2	3	3	2	Resursu trūkums, Ierobežotas zināšanas vai apmācību iespējas, Pretestība no kolēģiem vai izglītības iestādes, pretestība no citiem vecākiem grupā	Zināšanas, kas iegūtas studiju ietvaros, Formāla izglītība (kursi, diplomi) par profesionālās kompetences pilnveidi, Patstāvīgi apgūtas zināšanas, izmantojot resursus, piemēram, grāmatas, tiešsaistes kursus vai pētījumus., Zināšanas, kas gūtas sadarbībā ar kolēģiem, atbalsta personālu vai citu nozaru profesionāļiem	3.25
1	3	0	Profesionālā augstākā izglītība (1. līmenis), Bakalaura grāds	3-5 years	5	5	5	1	1	1	3	3	3	3	3	3	3	3	3	2	2	2	3	3	3	2	3	3	2	2	3	2	3	3	3	3	2	3	3	3	2	3	3	3	3	3	Laika ierobežojums	Zināšanas, kas iegūtas studiju ietvaros, Formāla izglītība (kursi, diplomi) par profesionālās kompetences pilnveidi, Zināšanas, kas gūtas sadarbībā ar kolēģiem, atbalsta personālu vai citu nozaru profesionāļiem	3
1	3	0	Profesionālā augstākā izglītība (1. līmenis)	3-5 years	4	4	4	0.75	0.75	0.75	3	3	3	3	3	4	3	3	3	3	2	3	3	1	3	2	1	3	2	2	3	3	3	3	4	3	3	3	4	3	2	3	3	3	3	2	Resursu trūkums, Ierobežotas zināšanas vai apmācību iespējas	Formāla izglītība (kursi, diplomi) par profesionālās kompetences pilnveidi, Patstāvīgi apgūtas zināšanas, izmantojot resursus, piemēram, grāmatas, tiešsaistes kursus vai pētījumus., Zināšanas, kas gūtas sadarbībā ar kolēģiem, atbalsta personālu vai citu nozaru profesionāļiem	3
1	3	0	Pašlaik iegūst kvalifikāciju	3-5 years	5	5	5	1	1	1	3	4	3	1	3	3	3	3	3	3	3	3	3	2	3	2	2	2	2	2	1	3	3	3	3	2	2	3	4	3	3	3	3	3	3	2	Resursu trūkums, Ierobežotas zināšanas vai apmācību iespējas, Laika ierobežojums	Zināšanas, kas iegūtas studiju ietvaros, Formāla izglītība (kursi, diplomi) par profesionālās kompetences pilnveidi, Patstāvīgi apgūtas zināšanas, izmantojot resursus, piemēram, grāmatas, tiešsaistes kursus vai pētījumus., Zināšanas, kas gūtas sadarbībā ar kolēģiem, atbalsta personālu vai citu nozaru profesionāļiem	2.75
1	3	0	Bakalaura grāds	More then 10 years	5	5	5	1	1	1	2	3	3	2	4	3	2	3	3	2	2	2	3	1	3	2	1	3	1	1	1	2	3	2	3	2	1	2	3	2	1	2	2	1	1	2	Resursu trūkums, Ierobežotas zināšanas vai apmācību iespējas, Laika ierobežojums	Formāla izglītība (kursi, diplomi) par profesionālās kompetences pilnveidi, Zināšanas, kas gūtas sadarbībā ar kolēģiem, atbalsta personālu vai citu nozaru profesionāļiem	2.5
2	3	0	Pašlaik iegūst kvalifikāciju	3-5 years	4	4	5	0.75	0.75	1	4	4	3	2	4	3	4	3	4	3	2	4	2	3	3	3	3	3	2	2	3	2	2	2	2	1	1	2	2	2	2	3	3	3	3	3	Resursu trūkums	Formālās apmācības (kursi, semināri) profesionālās kompetences pilnveidei	3.25
1	3	0	Pašlaik iegūst kvalifikāciju	1-2 years	4	4	3	0.75	0.75	0.5	3	2	3	3	3	4	3	3	4	2	2	1	2	3	3	2	1	2	1	1	2	3	3	2	2	2	1	3	3	2	1	3	1	2	3	2	Resursu trūkums, Ierobežotas zināšanas vai apmācību iespējas	Zināšanas, kas iegūtas studiju ietvaros, Patstāvīgi apgūtas zināšanas, izmantojot resursus, piemēram, grāmatas, tiešsaistes kursus vai pētījumus., Zināšanas, kas gūtas sadarbībā ar kolēģiem, atbalsta personālu vai citu nozaru profesionāļiem	2.75
1	3	0	Bakalaura grāds	3-5 years	5	2	3	1	0.25	0.5	2	3	3	2	3	4	3	4	4	3	2	2	2	3	4	3	2	3	2	2	2	4	4	2	3	2	2	2	3	2	2	3	2	2	3	3	Laika ierobežojums	Zināšanas, kas iegūtas studiju ietvaros, Formāla izglītība (kursi, diplomi) par profesionālās kompetences pilnveidi, Zināšanas, kas gūtas sadarbībā ar kolēģiem, atbalsta personālu vai citu nozaru profesionāļiem	2.5
1	3	0	Profesionālā augstākā izglītība (1. līmenis)	More then 10 years	5	5	5	1	1	1	3	4	4	2	4	3	3	4	3	3	4	3	3	3	4	4	3	4	2	4	3	4	4	4	4	2	2	3	3	4	3	3	3	3	4	4	Resursu trūkums, Laika ierobežojums	Formāla izglītība (kursi, diplomi) par profesionālās kompetences pilnveidi, Patstāvīgi apgūtas zināšanas, izmantojot resursus, piemēram, grāmatas, tiešsaistes kursus vai pētījumus., Zināšanas, kas gūtas sadarbībā ar kolēģiem, atbalsta personālu vai citu nozaru profesionāļiem	3.25
1	3	0	Profesionālā augstākā izglītība (1. līmenis)	More then 10 years	5	5	5	1	1	1	3	3	3	3	3	3	3	3	3	3	3	3	3	2	2	2	3	3	2	2	2	2	3	3	3	2	3	3	4	3	3	3	2	2	2	2	Laika ierobežojums	Zināšanas, kas iegūtas studiju ietvaros, Patstāvīgi apgūtas zināšanas, izmantojot resursus, piemēram, grāmatas, tiešsaistes kursus vai pētījumus., Zināšanas, kas gūtas sadarbībā ar kolēģiem, atbalsta personālu vai citu nozaru profesionāļiem	3
1	3	0	Profesionālā augstākā izglītība (1. līmenis)	3-5 years	5	5	5	1	1	1	3	3	3	3	3	3	3	4	3	3	3	3	3	2	2	3	3	3	2	2	3	3	2	3	3	3	3	3	3	3	3	3	3	3	3	3	Laika ierobežojums	Patstāvīgi apgūtas zināšanas, izmantojot resursus, piemēram, grāmatas, tiešsaistes kursus vai pētījumus., Zināšanas, kas gūtas sadarbībā ar kolēģiem, atbalsta personālu vai citu nozaru profesionāļiem	3
1	3	0	Bakalaura grāds	More then 10 years	4	4	4	0.75	0.75	0.75	3	3	3	3	3	3	3	3	3	3	3	3	3	3	3	3	3	3	2	3	3	3	3	3	3	3	3	3	3	3	3	3	3	3	3	3	Resursu trūkums, Laika ierobežojums	Zināšanas, kas gūtas sadarbībā ar kolēģiem, atbalsta personālu vai citu nozaru profesionāļiem, Atbilstošu zināšanu nav	3
1	3	0	Profesionālā augstākā izglītība (1. līmenis), Bakalaura grāds	More then 10 years	5	5	4	1	1	0.75	4	4	2	2	3	3	3	3	4	3	4	4	4	4	4	3	1	3	4	3	3	2	3	3	4	2	2	3	3	3	2	2	3	3	2	1	Laika ierobežojums	Zināšanas, kas iegūtas studiju ietvaros, Formāla izglītība (kursi, diplomi) par profesionālās kompetences pilnveidi, Patstāvīgi apgūtas zināšanas, izmantojot resursus, piemēram, grāmatas, tiešsaistes kursus vai pētījumus., Zināšanas, kas gūtas sadarbībā ar kolēģiem, atbalsta personālu vai citu nozaru profesionāļiem	3
1	3	0	Bakalaura grāds	More then 10 years	5	5	5	1	1	1	3	3	3	2	3	3	3	2	3	3	2	2	3	2	3	3	2	4	2	2	4	4	3	2	4	2	1	3	4	4	2	3	2	3	2	3	Laika ierobežojums, Katrā skolā ir nepieciešams pilnas slodzes psihologs,sociālais pedagogs pedagogsciālais pedagogsociālais pedagogsociālais pedagogs zat	Zināšanas, kas iegūtas studiju ietvaros, Formāla izglītība (kursi, diplomi) par profesionālās kompetences pilnveidi, Patstāvīgi apgūtas zināšanas, izmantojot resursus, piemēram, grāmatas, tiešsaistes kursus vai pētījumus., Zināšanas, kas gūtas sadarbībā ar kolēģiem, atbalsta personālu vai citu nozaru profesionāļiem	2.75
1	3	0	Pašlaik iegūst kvalifikāciju	More then 10 years	4	3	4	0.75	0.5	0.75	3	3	3	3	3	3	3	3	3	3	3	3	3	3	3	2	3	3	2	2	3	3	3	3	3	3	2	3	3	2	2	3	3	3	2	2	Resursu trūkums, Laika ierobežojums	Formāla izglītība (kursi, diplomi) par profesionālās kompetences pilnveidi, Patstāvīgi apgūtas zināšanas, izmantojot resursus, piemēram, grāmatas, tiešsaistes kursus vai pētījumus., Zināšanas, kas gūtas sadarbībā ar kolēģiem, atbalsta personālu vai citu nozaru profesionāļiem	3
2	3	0	Pašlaik iegūst kvalifikāciju	3-5 years	5	5	5	1	1	1	4	3	3	3	4	3	3	3	3	3	3	3	3	2	2	3	2	4	3	2	2	3	2	3	3	3	3	2	3	3	3	3	3	3	3	3	Pretestība no kolēģiem vai izglītības iestādes	Formālās apmācības (kursi, semināri) profesionālās kompetences pilnveidei	3.25
1	3	0	Pašlaik iegūst kvalifikāciju, Bakalaura grāds	1-2 years	5	5	5	1	1	1	3	3	3	4	3	3	3	3	3	3	3	3	3	3	3	2	2	3	1	3	3	3	3	3	3	3	3	3	3	3	3	3	3	2	2	2	Resursu trūkums, Ierobežotas zināšanas vai apmācību iespējas	Zināšanas, kas iegūtas studiju ietvaros, Patstāvīgi apgūtas zināšanas, izmantojot resursus, piemēram, grāmatas, tiešsaistes kursus vai pētījumus., Zināšanas, kas gūtas sadarbībā ar kolēģiem, atbalsta personālu vai citu nozaru profesionāļiem	3.25
1	3	0	Pašlaik iegūst kvalifikāciju	1-2 years	5	5	5	1	1	1	4	4	3	4	3	3	4	3	3	3	4	3	4	3	4	3	2	3	2	2	2	2	3	2	3	3	2	3	3	3	4	3	2	3	3	2	Ierobežotas zināšanas vai apmācību iespējas, Pretestība no kolēģiem vai izglītības iestādes	Zināšanas, kas iegūtas studiju ietvaros, Formāla izglītība (kursi, diplomi) par profesionālās kompetences pilnveidi, Patstāvīgi apgūtas zināšanas, izmantojot resursus, piemēram, grāmatas, tiešsaistes kursus vai pētījumus.	3.75
1	3	0	Bakalaura grāds	More then 10 years	5	5	5	1	1	1	4	4	4	4	3	3	3	3	4	3	4	3	3	3	3	3	2	3	3	3	4	3	4	4	3	3	3	4	3	4	3	3	4	3	4	3	Resursu trūkums, Ierobežotas zināšanas vai apmācību iespējas, Laika ierobežojums, Pretestība no kolēģiem vai izglītības iestādes	Atbilstošu zināšanu nav	4
1	3	0	Pašlaik iegūst kvalifikāciju	3-5 years	5	5	5	1	1	1	4	3	3	3	3	3	2	2	3	4	4	3	3	3	3	3	3	3	2	3	3	3	3	3	3	3	3	2	2	3	3	3	3	3	3	3	Ierobežotas zināšanas vai apmācību iespējas	Zināšanas, kas iegūtas studiju ietvaros, Patstāvīgi apgūtas zināšanas, izmantojot resursus, piemēram, grāmatas, tiešsaistes kursus vai pētījumus., Zināšanas, kas gūtas sadarbībā ar kolēģiem, atbalsta personālu vai citu nozaru profesionāļiem	3.25
2	3	0	Pašlaik iegūst kvalifikāciju	No experience	5	5	4	1	1	0.75	3	4	4	3	3	3	4	3	4	3	3	4	3	3	4	3	2	3	2	2	3	2	3	3	3	3	4	4	4	3	3	3	2	2	2	3	Ierobežotas zināšanas vai apmācību iespējas	Zināšanas, kas gūtas, sadarbojoties ar kolēģiem, atbalsta personālu vai citu jomu profesionāļiem	3.5
1	3	0	Bakalaura grāds	Less than 1 year	4	3	4	0.75	0.5	0.75	4	4	4	3	3	3	3	4	3	3	3	3	3	3	3	3	4	3	3	3	3	3	3	3	3	3	3	3	3	3	3	3	3	3	3	3	Resursu trūkums, Ierobežotas zināšanas vai apmācību iespējas	Zināšanas, kas iegūtas studiju ietvaros, Formāla izglītība (kursi, diplomi) par profesionālās kompetences pilnveidi	3.75
2	3	0	Pašlaik iegūst kvalifikāciju	No experience	5	5	5	1	1	1	3	3	2	3	3	3	3	3	3	3	3	3	3	3	3	3	3	3	3	3	3	3	3	3	2	3	3	3	3	3	3	3	3	3	3	3	Resursu trūkums	Formālās apmācības (kursi, semināri) profesionālās kompetences pilnveidei	2.75
2	3	0	Profesionālā augstākā izglītība (1. līmenis)	No experience	5	5	5	1	1	1	3	4	4	4	4	4	3	3	4	3	4	3	3	3	3	3	3	3	3	3	3	4	4	4	4	3	3	4	4	3	3	4	4	4	4	4	Resursu trūkums	Studiju periodā gūtās zināšanas studiju programmu ietvaros	3.75
1	3	0	Pašlaik iegūst kvalifikāciju	3-5 years	4	3	4	0.75	0.5	0.75	3	3	4	2	3	4	3	3	4	3	3	2	2	3	4	3	2	3	2	1	3	2	3	3	4	3	1	2	4	2	2	3	2	2	2	2	Ierobežotas zināšanas vai apmācību iespējas, Laika ierobežojums	Formāla izglītība (kursi, diplomi) par profesionālās kompetences pilnveidi	3
2	3	0	Pašlaik iegūst kvalifikāciju	6 - 10 years	5	4	5	1	0.75	1	3	4	4	3	4	4	3	3	4	4	3	2	3	4	4	4	2	4	2	3	3	3	3	3	3	3	3	4	4	3	3	3	3	4	3	3	Ierobežotas zināšanas vai apmācību iespējas	Formālās apmācības (kursi, semināri) profesionālās kompetences pilnveidei	3.5
1	3	0	Pašlaik iegūst kvalifikāciju	Less than 1 year	4	3	4	0.75	0.5	0.75	4	3	3	2	3	3	3	4	4	3	2	3	3	2	2	2	2	3	2	2	2	2	2	3	2	3	2	3	4	2	2	3	2	3	3	3	Resursu trūkums, Laika ierobežojums	Zināšanas, kas iegūtas studiju ietvaros, Zināšanas, kas gūtas sadarbībā ar kolēģiem, atbalsta personālu vai citu nozaru profesionāļiem	3
1	3	0	Pašlaik iegūst kvalifikāciju, Profesionālā augstākā izglītība (1. līmenis)	Less than 1 year	5	4	4	1	0.75	0.75	3	3	4	2	4	2	3	2	3	3	3	1	2	2	3	3	1	3	3	3	3	2	3	2	2	2	3	2	4	3	3	3	3	3	1	3	Resursu trūkums, Laika ierobežojums	Zināšanas, kas iegūtas studiju ietvaros, Patstāvīgi apgūtas zināšanas, izmantojot resursus, piemēram, grāmatas, tiešsaistes kursus vai pētījumus., Zināšanas, kas gūtas sadarbībā ar kolēģiem, atbalsta personālu vai citu nozaru profesionāļiem	3
2	3	0	Pašlaik iegūst kvalifikāciju	No experience	5	5	5	1	1	1	4	4	4	4	4	4	3	4	4	4	4	4	4	2	2	3	2	4	2	1	3	4	4	3	3	4	2	3	4	4	2	2	4	2	2	2	Laika ierobežojums	Zināšanas, kas gūtas, sadarbojoties ar kolēģiem, atbalsta personālu vai citu jomu profesionāļiem	4
2	3	0	Bakalaura grāds	More then 10 years	4	4	4	0.75	0.75	0.75	2	2	2	2	2	2	2	2	2	2	2	2	2	3	3	3	2	2	2	2	2	2	2	2	2	2	2	2	2	2	2	2	2	2	2	2	Laika ierobežojums	Formālās apmācības (kursi, semināri) profesionālās kompetences pilnveidei	2
1	4	0	Mestrado	3-5 years	4	4	4	0.75	0.75	0.75	4	4	4	4	4	4	4	3	4	2	4	4	4	2	4	4	4	4	3	4	3	4	4	4	4	2	4	4	4	4	4	4	4	2	4	2	Falta de recursos, Resistência dos colegas ou da instituição de ensino	Ensino formal (cursos, seminários) para melhorar as competências profissionais, Aprendizagem autónoma através de recursos como livros, cursos online ou investigação	4
1	4	0	Ensino superior profissional (nível 2)	More then 10 years	5	5	5	1	1	1	3	3	3	3	3	3	3	3	3	4	4	4	3	3	3	3	3	3	3	4	3	4	4	3	3	3	2	3	4	3	3	4	3	3	3	3	Resistência dos colegas ou da instituição de ensino	Ensino formal (cursos, seminários) para melhorar as competências profissionais	3
1	4	0	Grau de doutoramento	More then 10 years	5	5	5	1	1	1	4	4	4	4	4	4	4	4	4	4	4	4	4	4	4	4	4	4	4	4	4	4	4	4	4	4	4	4	4	4	4	4	4	4	4	4	Falta de recursos	Aprendizagem autónoma através de recursos como livros, cursos online ou investigação	4
1	4	0	Mestrado	More then 10 years	5	5	5	1	1	1	4	4	4	4	4	3	4	3	3	4	4	4	4	4	4	4	4	4	4	4	4	4	4	4	4	2	2	3	3	3	3	3	3	3	3	3	Falta de recursos	Aprendizagem autónoma através de recursos como livros, cursos online ou investigação	4
1	4	0	Mestrado	More then 10 years	5	5	5	1	1	1	3	3	3	3	3	4	3	3	3	3	3	3	3	4	4	4	4	4	4	4	4	4	4	4	4	3	3	3	3	3	4	3	3	3	3	3	Falta de recursos	Frequência de mestrado em educação especial-domínio cognitivo e motor	3
1	4	0	Mestrado	More then 10 years	4	5	4	0.75	1	0.75	4	4	3	3	4	4	4	4	4	4	4	2	4	2	4	2	4	4	4	4	4	4	4	4	3	4	4	4	3	3	4	4	4	4	4	4	Restrições de tempo	Conhecimentos adquiridos através da colaboração com colegas, pessoal de apoio ou profissionais de outras áreas	3.5
1	4	0	Bacharelato	More then 10 years	4	4	4	0.75	0.75	0.75	2	3	4	4	4	4	4	4	4	4	4	4	4	4	4	4	3	3	3	3	4	4	4	4	2	4	4	4	4	4	2	4	4	4	4	4	Falta de recursos	Aprendizagem autónoma através de recursos como livros, cursos online ou investigação	3.25
1	4	0	Ensino superior profissional (nível 1)	3-5 years	2	2	1	0.25	0.25	0	3	4	3	3	3	3	3	3	3	4	4	3	3	4	3	4	4	3	3	4	4	3	3	3	4	4	4	4	3	4	4	4	3	3	3	3	Falta de recursos	Conhecimentos adquiridos nos programas de estudo, Conhecimentos adquiridos através da colaboração com colegas, pessoal de apoio ou profissionais de outras áreas	3.25
1	4	0	Ensino superior profissional (nível 2)	6 - 10 years	5	5	5	1	1	1	4	3	3	4	3	3	3	3	3	3	4	2	4	4	4	2	4	3	3	2	4	2	4	2	4	4	4	4	4	4	2	3	3	3	4	3	Resistência dos colegas ou da instituição de ensino	Ensino formal (cursos, seminários) para melhorar as competências profissionais, Conhecimentos adquiridos através da colaboração com colegas, pessoal de apoio ou profissionais de outras áreas	3.5
1	4	0	Mestrado	More then 10 years	4	4	4	0.75	0.75	0.75	4	4	4	3	4	3	4	4	4	4	4	4	4	4	4	4	4	4	4	4	4	3	3	4	4	4	4	3	3	4	4	3	3	3	3	3	Falta de recursos	Conhecimentos adquiridos nos programas de estudo	3.75
1	4	0	Ensino superior profissional (nível 2)	More then 10 years	5	5	5	1	1	1	3	3	3	3	3	3	3	3	3	3	3	3	3	3	3	3	3	3	3	3	3	4	4	4	4	3	3	3	3	3	3	3	4	3	3	3	Falta de recursos, Conhecimentos ou oportunidades de formação limitados, Restrições de tempo, Resistência dos colegas ou da instituição de ensino	Conhecimentos adquiridos nos programas de estudo, Ensino formal (cursos, seminários) para melhorar as competências profissionais, Aprendizagem autónoma através de recursos como livros, cursos online ou investigação, Conhecimentos adquiridos através da colaboração com colegas, pessoal de apoio ou profissionais de outras áreas	3
1	4	0	Ensino superior profissional (nível 1)	More then 10 years	2	2	2	0.25	0.25	0.25	4	4	4	4	4	4	4	4	4	4	4	4	4	4	4	4	4	4	4	4	4	4	4	4	4	4	4	4	4	4	4	4	4	4	4	4	Falta de recursos	Aprendizagem autónoma através de recursos como livros, cursos online ou investigação	4
1	4	0	Ensino superior profissional (nível 2)	More then 10 years	4	4	4	0.75	0.75	0.75	3	3	3	3	4	3	3	3	3	4	3	3	3	4	3	3	4	4	3	3	4	3	3	3	3	3	3	4	3	3	3	4	4	2	3	3	Restrições de tempo	Ensino formal (cursos, seminários) para melhorar as competências profissionais, Nenhum conhecimento relevante	3
1	4	0	Ensino superior profissional (nível 2)	More then 10 years	5	5	5	1	1	1	4	4	4	4	4	4	3	3	3	4	4	2	4	3	3	4	4	4	2	2	4	2	4	2	2	2	2	4	4	4	4	4	2	2	4	4	Falta de recursos, Restrições de tempo	Aprendizagem autónoma através de recursos como livros, cursos online ou investigação, Conhecimentos adquiridos através da colaboração com colegas, pessoal de apoio ou profissionais de outras áreas	4
1	4	0	Bacharelato	More then 10 years	1	1	1	0	0	0	4	4	4	4	4	4	4	4	4	2	4	4	4	4	4	4	4	4	4	4	4	4	4	4	4	4	4	4	4	4	4	4	4	4	4	4	Falta de recursos, Restrições de tempo, Resistência dos colegas ou da instituição de ensino	Nenhum conhecimento relevante	4
1	4	0	Ensino superior profissional (nível 1)	More then 10 years	5	5	5	1	1	1	4	3	3	4	4	3	3	3	3	4	3	4	3	4	3	4	3	3	4	4	3	3	3	3	3	4	3	4	3	3	4	4	4	3	4	3	Restrições de tempo	Ensino formal (cursos, seminários) para melhorar as competências profissionais, Aprendizagem autónoma através de recursos como livros, cursos online ou investigação, Conhecimentos adquiridos através da colaboração com colegas, pessoal de apoio ou profissionais de outras áreas	3.5
1	4	0	Mestrado	3-5 years	5	5	4	1	1	0.75	4	3	4	3	2	4	3	4	4	2	4	1	2	4	4	2	2	4	2	4	2	2	4	4	4	4	2	4	4	1	2	2	2	4	1	4	Falta de recursos, Restrições de tempo, Resistência dos colegas ou da instituição de ensino	Ensino formal (cursos, seminários) para melhorar as competências profissionais, Conhecimentos adquiridos através da colaboração com colegas, pessoal de apoio ou profissionais de outras áreas	3.5
1	4	0	Ensino superior profissional (nível 2)	More then 10 years	5	5	5	1	1	1	3	3	3	3	3	3	3	3	3	3	3	2	4	2	4	3	4	3	2	2	4	2	2	4	3	4	4	3	3	4	2	2	3	1	2	4	Restrições de tempo, Resistência dos colegas ou da instituição de ensino	Ensino formal (cursos, seminários) para melhorar as competências profissionais, Aprendizagem autónoma através de recursos como livros, cursos online ou investigação	3
1	4	0	Ensino superior profissional (nível 1)	More then 10 years	4	4	4	0.75	0.75	0.75	2	4	4	4	4	4	4	4	4	4	4	2	4	4	3	3	3	3	4	4	4	3	3	3	4	2	2	3	4	4	4	2	3	4	4	3	Falta de recursos, Restrições de tempo	Ensino formal (cursos, seminários) para melhorar as competências profissionais, Conhecimentos adquiridos através da colaboração com colegas, pessoal de apoio ou profissionais de outras áreas	3.5
1	4	0	Ensino superior profissional (nível 2)	More then 10 years	2	2	2	0.25	0.25	0.25	2	4	4	2	4	4	4	4	4	4	4	2	4	4	2	4	4	2	2	2	2	4	4	4	4	4	4	2	2	4	2	4	4	4	2	4	Falta de recursos, Restrições de tempo, Resistência dos colegas ou da instituição de ensino	Aprendizagem autónoma através de recursos como livros, cursos online ou investigação, Conhecimentos adquiridos através da colaboração com colegas, pessoal de apoio ou profissionais de outras áreas	3
1	4	0	Ensino superior profissional (nível 1)	More then 10 years	4	5	5	0.75	1	1	4	4	2	2	3	3	3	3	3	4	3	3	4	2	2	2	3	3	4	4	3	4	3	4	3	4	4	4	3	3	4	3	4	4	4	4	Falta de recursos, Resistência dos colegas ou da instituição de ensino	Aprendizagem autónoma através de recursos como livros, cursos online ou investigação	3
1	4	0	Mestrado	More then 10 years	3	5	5	0.5	1	1	4	3	3	3	4	3	4	4	4	4	4	4	2	4	4	4	4	4	4	4	4	4	4	4	4	2	2	4	4	4	4	3	3	4	4	4	Falta de recursos, Restrições de tempo, Resistência dos colegas ou da instituição de ensino	Aprendizagem autónoma através de recursos como livros, cursos online ou investigação, Conhecimentos adquiridos através da colaboração com colegas, pessoal de apoio ou profissionais de outras áreas	3.25
1	4	0	Bacharelato	More then 10 years	2	2	2	0.25	0.25	0.25	4	4	4	1	4	4	2	4	4	2	2	2	2	2	4	2	2	4	2	2	2	4	4	4	4	4	1	4	4	4	2	4	4	2	2	4	Falta de recursos	Ensino formal (cursos, seminários) para melhorar as competências profissionais	3.25
1	4	0	Bacharelato	More then 10 years	5	5	5	1	1	1	3	3	3	3	4	4	3	3	3	3	4	4	3	2	3	1	2	3	3	3	3	3	4	4	3	4	4	2	3	4	4	4	4	4	3	4	Falta de recursos	Conhecimentos adquiridos através da colaboração com colegas, pessoal de apoio ou profissionais de outras áreas	3
1	4	0	Bacharelato	More then 10 years	4	4	4	0.75	0.75	0.75	3	3	3	3	3	3	3	3	3	3	3	3	3	4	4	4	4	4	4	4	4	4	4	4	4	3	4	4	4	4	4	3	4	3	3	3	Restrições de tempo	Conhecimentos adquiridos através da colaboração com colegas, pessoal de apoio ou profissionais de outras áreas	3
1	4	0	Bacharelato	More then 10 years	4	4	4	0.75	0.75	0.75	4	3	4	4	4	4	4	4	4	2	4	2	4	2	1	1	2	4	2	2	2	2	4	4	3	2	2	4	4	4	2	2	2	4	2	2	Falta de recursos, Conhecimentos ou oportunidades de formação limitados	Ensino formal (cursos, seminários) para melhorar as competências profissionais	3.75
1	4	0	Ensino superior profissional (nível 2)	More then 10 years	1	5	4	0	1	0.75	1	3	3	1	1	3	1	1	1	3	1	3	1	1	1	1	1	1	3	1	3	3	3	1	1	1	1	1	1	1	1	1	1	1	1	1	Falta de recursos, Restrições de tempo, Resistência dos colegas ou da instituição de ensino	Conhecimentos adquiridos nos programas de estudo, Ensino formal (cursos, seminários) para melhorar as competências profissionais, Aprendizagem autónoma através de recursos como livros, cursos online ou investigação, Conhecimentos adquiridos através da colaboração com colegas, pessoal de apoio ou profissionais de outras áreas	2
1	4	0	Atualmente a frequentar um curso de qualificação	Less than 1 year	4	5	4	0.75	1	0.75	2	2	4	4	3	4	4	3	3	4	3	4	3	4	4	4	4	3	3	4	4	3	4	3	3	3	4	4	4	4	4	4	4	3	3	3	Resistência dos colegas ou da instituição de ensino	Conhecimentos adquiridos nos programas de estudo	3
1	4	0	Mestrado	More then 10 years	5	5	5	1	1	1	3	3	4	3	3	3	4	3	3	3	4	4	4	2	2	2	2	2	2	2	2	2	2	2	2	2	2	4	4	4	4	4	4	4	4	4	Restrições de tempo	Ensino formal (cursos, seminários) para melhorar as competências profissionais, Conhecimentos adquiridos através da colaboração com colegas, pessoal de apoio ou profissionais de outras áreas	3.25
1	4	0	Ensino superior profissional (nível 2)	More then 10 years	5	5	5	1	1	1	4	4	3	3	3	3	3	3	3	4	3	4	3	2	4	3	2	4	4	4	4	3	3	3	3	4	4	3	3	3	3	4	3	3	3	3	Resistência dos colegas ou da instituição de ensino	Ensino formal (cursos, seminários) para melhorar as competências profissionais, Aprendizagem autónoma através de recursos como livros, cursos online ou investigação, Conhecimentos adquiridos através da colaboração com colegas, pessoal de apoio ou profissionais de outras áreas	3.5
1	4	0	Ensino superior profissional (nível 2)	More then 10 years	4	4	4	0.75	0.75	0.75	4	4	4	4	4	4	4	4	4	4	4	4	4	4	4	4	4	4	4	4	4	4	4	4	4	4	4	4	4	4	4	4	4	4	3	3	Falta de recursos	Conhecimentos adquiridos nos programas de estudo	4
2	4	0	Ensino superior profissional (nível 1)	Less than 1 year	5	5	5	1	1	1	3	3	3	3	3	3	3	3	3	3	3	3	3	3	3	3	3	3	3	3	3	3	3	3	3	3	3	3	3	3	3	3	4	3	3	3	Falta de recursos	Conhecimentos adquiridos através da colaboração com colegas, pessoal de apoio ou profissionais de outras áreas	3
1	4	0	Mestrado	More then 10 years	5	5	5	1	1	1	3	4	4	4	3	3	4	3	3	4	4	2	4	4	4	4	4	4	2	2	4	4	4	4	4	4	2	4	4	4	2	4	4	4	4	4	Falta de recursos, Restrições de tempo	Aprendizagem autónoma através de recursos como livros, cursos online ou investigação, Conhecimentos adquiridos através da colaboração com colegas, pessoal de apoio ou profissionais de outras áreas	3.75
1	4	0	Ensino superior profissional (nível 2)	More then 10 years	5	4	4	1	0.75	0.75	2	4	3	4	3	3	3	4	4	3	3	4	3	2	4	2	4	3	4	4	4	3	3	3	4	4	4	3	3	3	2	2	3	4	4	4	Falta de recursos, Recursos humanos	Ensino formal (cursos, seminários) para melhorar as competências profissionais, Aprendizagem autónoma através de recursos como livros, cursos online ou investigação, Conhecimentos adquiridos através da colaboração com colegas, pessoal de apoio ou profissionais de outras áreas	3.25
1	4	0	Ensino superior profissional (nível 2)	More then 10 years	5	5	5	1	1	1	4	4	3	2	3	4	3	4	3	3	3	4	3	1	2	2	3	3	2	1	4	3	3	3	2	3	1	3	3	3	1	4	4	3	4	3	Falta de recursos	Conhecimentos adquiridos nos programas de estudo, Conhecimentos adquiridos através da colaboração com colegas, pessoal de apoio ou profissionais de outras áreas	3.25
1	4	0	Ensino superior profissional (nível 2)	More then 10 years	5	5	5	1	1	1	4	4	4	4	4	4	4	4	4	4	2	2	4	4	4	4	2	4	4	2	4	4	4	4	4	4	4	4	4	4	4	4	4	4	2	4	Falta de recursos, Conhecimentos ou oportunidades de formação limitados	Ensino formal (cursos, seminários) para melhorar as competências profissionais, Aprendizagem autónoma através de recursos como livros, cursos online ou investigação, Conhecimentos adquiridos através da colaboração com colegas, pessoal de apoio ou profissionais de outras áreas	4
1	4	0	Mestrado	More then 10 years	5	4	5	1	0.75	1	4	4	4	4	4	3	3	3	4	4	4	3	2	4	4	3	4	4	2	2	2	4	4	2	2	4	4	4	4	4	2	4	2	4	4	4	Falta de recursos, Restrições de tempo	Conhecimentos adquiridos nos programas de estudo, Conhecimentos adquiridos através da colaboração com colegas, pessoal de apoio ou profissionais de outras áreas	4
1	4	0	Mestrado	More then 10 years	5	5	5	1	1	1	3	4	3	4	3	3	3	3	3	4	4	4	4	4	4	4	4	4	4	4	4	4	4	4	4	4	4	4	4	3	4	4	3	4	4	3	Falta de recursos, Restrições de tempo	Ensino formal (cursos, seminários) para melhorar as competências profissionais, Aprendizagem autónoma através de recursos como livros, cursos online ou investigação	3.5
1	4	0	Mestrado	3-5 years	2	2	2	0.25	0.25	0.25	4	4	2	4	4	4	4	4	4	4	4	4	4	4	4	4	4	4	4	2	4	3	2	4	4	2	2	4	4	4	4	2	2	4	4	4	Conhecimentos ou oportunidades de formação limitados, Restrições de tempo, Resistência dos colegas ou da instituição de ensino	Ensino formal (cursos, seminários) para melhorar as competências profissionais, Aprendizagem autónoma através de recursos como livros, cursos online ou investigação	3.5
1	4	0	Bacharelato	More then 10 years	5	5	5	1	1	1	3	3	3	2	4	3	3	3	3	4	3	2	3	1	3	1	2	3	2	2	2	4	4	4	4	2	2	4	4	4	2	4	2	4	2	4		Conhecimentos adquiridos através da colaboração com colegas, pessoal de apoio ou profissionais de outras áreas, Ação de formação de 50 horas	2.75
1	4	0	Ensino superior profissional (nível 2)	3-5 years	2	2	2	0.25	0.25	0.25	4	4	4	2	4	4	2	4	4	2	2	2	2	2	2	2	2	2	2	2	2	2	2	2	2	2	2	2	2	2	2	2	2	2	2	2	Falta de recursos	Conhecimentos adquiridos nos programas de estudo	3.5
1	4	0	Ensino superior profissional (nível 2)	More then 10 years	4	5	4	0.75	1	0.75	3	3	3	2	3	4	2	4	4	4	2	4	4	2	2	4	2	2	2	2	2	4	4	2	2	2	2	4	4	4	2	2	4	4	2	4	Conhecimentos ou oportunidades de formação limitados, Restrições de tempo	Aprendizagem autónoma através de recursos como livros, cursos online ou investigação, Conhecimentos adquiridos através da colaboração com colegas, pessoal de apoio ou profissionais de outras áreas	2.75
2	4	0	Atualmente a frequentar um curso de qualificação	Less than 1 year	5	4	4	1	0.75	0.75	4	4	4	4	4	4	4	4	4	4	4	4	4	2	4	4	4	4	4	4	4	4	4	4	4	4	4	4	4	4	4	4	4	4	4	4	Falta de recursos	Ensino formal (cursos, seminários) para melhorar as competências profissionais	4
1	4	0	Ensino superior profissional (nível 2)	6 - 10 years	5	5	5	1	1	1	4	4	4	4	4	4	4	4	4	2	2	4	4	4	4	4	2	4	4	2	4	4	4	4	4	4	1	4	4	4	4	4	4	4	2	4	Restrições de tempo, Resistência dos colegas ou da instituição de ensino	Aprendizagem autónoma através de recursos como livros, cursos online ou investigação, Conhecimentos adquiridos através da colaboração com colegas, pessoal de apoio ou profissionais de outras áreas	4
1	4	0	Mestrado	More then 10 years	5	5	5	1	1	1	3	3	3	3	3	3	3	3	3	3	3	3	3	4	4	4	4	4	3	3	3	3	3	3	3	3	3	3	3	3	3	4	4	4	3	3	Falta de recursos	Conhecimentos adquiridos nos programas de estudo	3
1	4	0	Bacharelato	More then 10 years	4	4	4	0.75	0.75	0.75	3	4	3	3	3	3	3	4	4	4	3	4	4	2	4	2	4	4	1	1	4	4	3	3	4	4	2	4	4	4	2	2	2	4	4	4	Restrições de tempo	Ensino formal (cursos, seminários) para melhorar as competências profissionais, Aprendizagem autónoma através de recursos como livros, cursos online ou investigação, Conhecimentos adquiridos através da colaboração com colegas, pessoal de apoio ou profissionais de outras áreas	3.25
1	4	0	Bacharelato	More then 10 years	4	4	4	0.75	0.75	0.75	4	4	4	4	4	3	3	4	3	2	2	2	4	2	2	2	1	2	1	1	2	2	4	2	4	2	2	4	4	3	4	4	4	4	4	4	Falta de recursos	Aprendizagem autónoma através de recursos como livros, cursos online ou investigação	4
1	4	0	Mestrado	More then 10 years	5	5	5	1	1	1	3	3	3	3	3	3	3	3	3	3	3	3	3	4	4	4	4	4	2	4	4	4	4	3	3	3	3	3	3	3	3	3	3	3	3	3	Falta de recursos	Conhecimentos adquiridos através da colaboração com colegas, pessoal de apoio ou profissionais de outras áreas	3
1	4	0	Mestrado	More then 10 years	5	5	5	1	1	1	4	4	4	4	3	3	3	3	3	3	3	3	3	3	3	3	4	4	4	4	3	3	3	4	3	3	3	3	3	3	3	3	3	3	3	3	Falta de recursos	Conhecimentos adquiridos através da colaboração com colegas, pessoal de apoio ou profissionais de outras áreas	4
1	4	0	Mestrado	More then 10 years	4	4	4	0.75	0.75	0.75	4	4	4	2	3	4	4	2	4	2	3	4	4	2	4	4	4	3	4	3	3	4	4	4	2	4	2	3	3	3	3	3	3	4	4	3	Restrições de tempo	Ensino formal (cursos, seminários) para melhorar as competências profissionais, Conhecimentos adquiridos através da colaboração com colegas, pessoal de apoio ou profissionais de outras áreas	3.5
2	4	0	Atualmente a frequentar um curso de qualificação	No experience	3	5	5	0.5	1	1	4	3	3	3	4	3	3	4	3	3	3	3	4	2	3	3	4	3	3	3	3	4	4	4	4	3	4	3	3	2	4	4	4	3	3	3	Resistência dos colegas ou da instituição de ensino	Conhecimentos adquiridos através da colaboração com colegas, pessoal de apoio ou profissionais de outras áreas	3.25
2	4	0	Atualmente a frequentar um curso de qualificação	1-2 years	5	4	4	1	0.75	0.75	4	3	3	3	3	4	3	3	3	3	3	3	3	3	3	3	4	4	4	4	4	4	4	2	4	4	4	2	4	4	4	4	2	4	4	4	Restrições de tempo	Conhecimentos adquiridos nos programas de estudo	3.25
1	4	0	Bacharelato	More then 10 years	5	5	4	1	1	0.75	4	3	3	4	4	4	3	3	3	4	3	4	4	2	4	3	4	4	4	2	4	4	4	4	4	2	2	4	4	4	4	4	4	4	3	4	Restrições de tempo	Formação	3.5
2	4	0	Ensino superior profissional (nível 2)	No experience	5	5	5	1	1	1	3	4	3	3	4	3	3	4	4	3	3	3	3	3	3	3	3	3	4	3	3	3	3	3	3	3	3	3	3	3	3	3	3	3	3	3	Restrições de tempo	Ensino formal (cursos, seminários) para melhorar as competências profissionais	3.25
1	4	0	Mestrado	More then 10 years	5	5	5	1	1	1	4	4	4	4	3	3	3	3	3	4	4	4	3	4	4	3	4	4	3	3	4	4	4	4	4	4	4	3	3	4	4	4	4	4	4	3	Falta de recursos, Resistência dos colegas ou da instituição de ensino	Conhecimentos adquiridos nos programas de estudo, Aprendizagem autónoma através de recursos como livros, cursos online ou investigação	4
1	4	0	Bacharelato	More then 10 years	1	1	1	0	0	0	4	2	2	2	4	4	4	4	4	4	2	1	4	2	4	2	2	4	4	4	4	4	4	3	4	4	4	4	4	4	4	4	4	4	4	4	Falta de recursos	Ensino formal (cursos, seminários) para melhorar as competências profissionais, Conhecimentos adquiridos através da colaboração com colegas, pessoal de apoio ou profissionais de outras áreas	2.5
1	4	0	Ensino superior profissional (nível 2)	More then 10 years	4	4	4	0.75	0.75	0.75	4	2	4	4	4	4	4	2	4	4	4	2	2	2	4	2	2	2	4	2	2	4	4	2	4	2	2	4	4	2	2	2	2	2	2	2	Falta de recursos, Resistência dos colegas ou da instituição de ensino	Conhecimentos adquiridos nos programas de estudo, Aprendizagem autónoma através de recursos como livros, cursos online ou investigação, Conhecimentos adquiridos através da colaboração com colegas, pessoal de apoio ou profissionais de outras áreas	3.5
2	4	0	Atualmente a frequentar um curso de qualificação	No experience	5	5	5	1	1	1	3	3	3	3	3	3	3	3	3	3	3	3	3	3	3	3	3	3	3	3	3	3	3	3	3	3	3	3	3	3	3	3	3	3	3	3	Falta de recursos	Conhecimentos adquiridos através da colaboração com colegas, pessoal de apoio ou profissionais de outras áreas	3
2	4	0	Atualmente a frequentar um curso de qualificação	Less than 1 year	3	3	3	0.5	0.5	0.5	2	2	2	2	2	2	2	2	2	2	2	2	2	2	2	2	2	2	2	2	2	2	2	2	2	2	2	2	2	2	2	2	2	2	2	2	Falta de recursos	Ensino formal (cursos, seminários) para melhorar as competências profissionais	2
1	4	0	Mestrado	More then 10 years	5	5	5	1	1	1	3	4	4	3	4	3	4	4	4	4	4	2	4	4	4	4	2	2	2	2	4	4	4	4	4	2	2	3	3	4	4	4	4	3	2	3	Conhecimentos ou oportunidades de formação limitados, Restrições de tempo	Aprendizagem autónoma através de recursos como livros, cursos online ou investigação, Conhecimentos adquiridos através da colaboração com colegas, pessoal de apoio ou profissionais de outras áreas	3.5
1	4	0	Ensino superior profissional (nível 2)	More then 10 years	5	5	4	1	1	0.75	4	4	3	4	3	4	2	4	3	2	4	2	2	1	4	2	1	4	2	2	2	4	4	4	2	4	1	3	3	4	2	1	4	3	4	4	Falta de recursos, Conhecimentos ou oportunidades de formação limitados	Ensino formal (cursos, seminários) para melhorar as competências profissionais, Aprendizagem autónoma através de recursos como livros, cursos online ou investigação, Conhecimentos adquiridos através da colaboração com colegas, pessoal de apoio ou profissionais de outras áreas	3.75
1	4	0	Mestrado	More then 10 years	4	4	4	0.75	0.75	0.75	4	2	4	4	4	2	4	4	3	4	4	2	4	4	4	4	2	2	2	2	2	2	2	2	2	2	2	2	2	2	2	2	2	2	2	2	Conhecimentos ou oportunidades de formação limitados	Aprendizagem autónoma através de recursos como livros, cursos online ou investigação	3.5
1	4	1	Atualmente a frequentar um curso de qualificação	Less than 1 year	4	5	3	0.75	1	0.5	4	4	3	4	2	4	4	4	2	4	3	4	3	4	4	4	4	4	3	4	4	4	4	3	3	4	4	4	4	4	4	4	4	4	4	4	Conhecimentos ou oportunidades de formação limitados	Conhecimentos adquiridos nos programas de estudo	3.75
1	4	0	Mestrado	More then 10 years	5	5	5	1	1	1	4	4	4	2	4	4	3	4	3	4	4	2	2	4	4	3	4	4	2	2	4	4	4	4	4	4	2	2	3	3	2	2	4	3	2	3	Conhecimentos ou oportunidades de formação limitados, Resistência dos colegas ou da instituição de ensino	Ensino formal (cursos, seminários) para melhorar as competências profissionais, Aprendizagem autónoma através de recursos como livros, cursos online ou investigação	3.5
1	4	0	Mestrado	More then 10 years	5	4	5	1	0.75	1	3	3	3	3	3	3	4	3	3	4	4	3	4	2	2	1	3	3	2	3	2	4	4	3	3	4	2	3	3	3	3	3	2	3	3	3	Falta de recursos	Conhecimentos adquiridos nos programas de estudo, Ensino formal (cursos, seminários) para melhorar as competências profissionais, Aprendizagem autónoma através de recursos como livros, cursos online ou investigação	3
1	4	0	Ensino superior profissional (nível 1)	More then 10 years	4	4	4	0.75	0.75	0.75	4	2	4	2	3	4	3	4	4	4	4	2	2	2	2	4	2	4	2	2	2	2	4	2	2	2	2	4	4	4	2	2	2	1	2	4	Conhecimentos ou oportunidades de formação limitados	Aprendizagem autónoma através de recursos como livros, cursos online ou investigação	3
1	4	1	Ensino superior profissional (nível 2)	More then 10 years	4	5	4	0.75	1	0.75	4	4	4	3	4	4	4	4	4	2	4	2	2	4	4	2	2	4	2	2	2	4	3	4	4	2	2	4	4	4	2	2	2	2	4	3	Falta de recursos, Conhecimentos ou oportunidades de formação limitados	Conhecimentos adquiridos nos programas de estudo, Ensino formal (cursos, seminários) para melhorar as competências profissionais, Aprendizagem autónoma através de recursos como livros, cursos online ou investigação, Conhecimentos adquiridos através da colaboração com colegas, pessoal de apoio ou profissionais de outras áreas	3.75
1	4	0	Mestrado	More then 10 years	5	5	5	1	1	1	4	3	3	3	3	4	3	3	3	4	3	3	3	4	4	4	3	3	4	3	3	4	3	3	3	3	3	3	4	4	3	4	3	3	4	3	Falta de recursos, Conhecimentos ou oportunidades de formação limitados, Restrições de tempo	Conhecimentos adquiridos através da colaboração com colegas, pessoal de apoio ou profissionais de outras áreas	3.25
1	4	0	Mestrado	More then 10 years	4	5	5	0.75	1	1	4	4	4	2	4	4	4	4	4	4	4	4	2	4	4	4	4	4	2	2	4	3	4	4	2	2	2	4	4	4	2	4	4	4	4	4	Falta de recursos, Conhecimentos ou oportunidades de formação limitados, Restrições de tempo	Conhecimentos adquiridos nos programas de estudo, Aprendizagem autónoma através de recursos como livros, cursos online ou investigação, Conhecimentos adquiridos através da colaboração com colegas, pessoal de apoio ou profissionais de outras áreas	3.5
1	4	0	Mestrado	1-2 years	4	4	4	0.75	0.75	0.75	2	4	4	4	3	4	3	3	3	4	3	4	2	4	4	4	4	3	2	2	2	2	2	2	4	2	4	4	2	4	4	1	2	4	2	4	Falta de recursos, Restrições de tempo	Conhecimentos adquiridos nos programas de estudo, Aprendizagem autónoma através de recursos como livros, cursos online ou investigação	3.5
1	4	0	Mestrado	More then 10 years	5	5	5	1	1	1	2	2	2	1	3	3	3	3	3	4	3	2	3	1	2	2	2	4	2	2	4	4	4	4	4	2	1	3	4	4	2	2	4	2	2	2	Falta de recursos, Resistência dos colegas ou da instituição de ensino	Conhecimentos adquiridos nos programas de estudo, Ensino formal (cursos, seminários) para melhorar as competências profissionais, Aprendizagem autónoma através de recursos como livros, cursos online ou investigação, Conhecimentos adquiridos através da colaboração com colegas, pessoal de apoio ou profissionais de outras áreas	1.75
1	4	0	Ensino superior profissional (nível 2)	More then 10 years	4	4	4	0.75	0.75	0.75	3	4	4	4	4	3	4	4	3	4	4	2	2	2	4	2	4	4	4	4	4	4	4	4	4	4	2	4	4	3	2	2	2	4	4	4	Falta de recursos, Restrições de tempo	Ensino formal (cursos, seminários) para melhorar as competências profissionais, Aprendizagem autónoma através de recursos como livros, cursos online ou investigação, Conhecimentos adquiridos através da colaboração com colegas, pessoal de apoio ou profissionais de outras áreas	3.75
1	4	1	Bacharelato	More then 10 years	4	4	4	0.75	0.75	0.75	3	3	3	3	4	4	4	4	2	4	4	2	4	4	4	4	2	2	2	2	2	3	4	4	4	2	2	4	4	2	4	4	4	4	4	4	Falta de recursos	Ensino formal (cursos, seminários) para melhorar as competências profissionais, Conhecimentos adquiridos através da colaboração com colegas, pessoal de apoio ou profissionais de outras áreas	3
1	4	0	Ensino superior profissional (nível 1)	More then 10 years	5	4	4	1	0.75	0.75	3	4	2	2	4	4	4	4	4	4	2	2	2	1	2	1	4	4	2	2	4	4	4	4	4	1	1	2	4	2	2	4	4	4	2	2	Falta de recursos	Ensino formal (cursos, seminários) para melhorar as competências profissionais	2.75
1	4	0	Ensino superior profissional (nível 1)	More then 10 years	4	4	4	0.75	0.75	0.75	4	4	4	4	4	4	4	4	4	4	4	4	4	4	4	4	4	4	4	4	4	4	4	4	4	4	4	4	4	4	4	4	4	4	4	4	Restrições de tempo	Ensino formal (cursos, seminários) para melhorar as competências profissionais	4
1	4	1	Atualmente a frequentar um curso de qualificação	Less than 1 year	5	5	5	1	1	1	4	4	4	4	4	4	4	4	4	4	4	4	4	4	4	4	4	4	4	4	4	4	4	4	4	4	4	4	4	4	4	4	4	4	4	4	Resistência dos colegas ou da instituição de ensino	Conhecimentos adquiridos nos programas de estudo	4
1	4	0	Ensino superior profissional (nível 2)	More then 10 years	1	1	1	0	0	0	4	4	4	4	4	4	2	4	4	2	4	2	4	2	4	4	4	4	2	2	2	4	4	4	4	4	2	4	4	4	4	2	2	4	4	4	Restrições de tempo	Conhecimentos adquiridos nos programas de estudo, Conhecimentos adquiridos através da colaboração com colegas, pessoal de apoio ou profissionais de outras áreas	4
1	4	0	Ensino superior profissional (nível 2)	More then 10 years	4	4	4	0.75	0.75	0.75	4	4	3	3	2	4	4	4	4	4	4	4	4	4	4	2	4	4	2	4	4	4	4	4	4	2	2	4	4	2	2	2	4	2	2	2	Falta de recursos, Resistência dos colegas ou da instituição de ensino	Ensino formal (cursos, seminários) para melhorar as competências profissionais, Aprendizagem autónoma através de recursos como livros, cursos online ou investigação	3.5
1	4	0	Ensino superior profissional (nível 1)	More then 10 years	4	4	4	0.75	0.75	0.75	4	4	3	3	3	4	4	4	3	4	4	3	4	3	3	3	4	4	2	2	4	2	4	4	2	4	4	4	4	3	4	4	4	4	4	4	Falta de recursos	Ensino formal (cursos, seminários) para melhorar as competências profissionais, Conhecimentos adquiridos através da colaboração com colegas, pessoal de apoio ou profissionais de outras áreas	3.5
1	4	0	Mestrado	More then 10 years	5	5	5	1	1	1	4	4	3	3	3	3	3	3	3	4	3	4	4	4	3	3	4	3	4	3	3	3	3	3	3	4	4	3	3	4	4	2	4	2	4	3	Falta de recursos, Restrições de tempo	Ensino formal (cursos, seminários) para melhorar as competências profissionais, Aprendizagem autónoma através de recursos como livros, cursos online ou investigação, Conhecimentos adquiridos através da colaboração com colegas, pessoal de apoio ou profissionais de outras áreas	3.5
1	4	0	Ensino superior profissional (nível 2)	More then 10 years	4	4	4	0.75	0.75	0.75	3	3	3	3	3	3	3	3	3	3	3	3	3	4	3	3	4	4	3	3	3	3	3	3	3	3	3	3	3	3	3	4	4	3	3	3	Restrições de tempo	Aprendizagem autónoma através de recursos como livros, cursos online ou investigação	3
2	4	0	Ensino superior profissional (nível 1)	1-2 years	4	4	4	0.75	0.75	0.75	4	3	4	3	3	3	3	3	3	3	3	3	3	3	3	3	3	3	3	4	3	4	3	3	3	3	3	3	3	3	3	3	3	3	4	3	Restrições de tempo	Conhecimentos adquiridos nos programas de estudo	3.5
2	4	0	Ensino superior profissional (nível 1)	Less than 1 year	4	3	4	0.75	0.5	0.75	2	3	4	4	4	4	4	4	4	2	4	2	4	3	4	4	4	4	4	4	4	4	4	4	4	4	4	2	4	2	2	2	4	4	2	2	Resistência dos colegas ou da instituição de ensino	Conhecimentos adquiridos através da colaboração com colegas, pessoal de apoio ou profissionais de outras áreas	3.25
1	4	0	Bacharelato	More then 10 years	4	4	4	0.75	0.75	0.75	4	4	3	4	4	4	4	3	4	4	4	4	4	4	4	4	4	4	4	4	4	4	4	4	4	4	4	4	4	4	4	4	4	4	4	4	Falta de recursos	Ensino formal (cursos, seminários) para melhorar as competências profissionais	3.75
1	4	0	Ensino superior profissional (nível 1)	More then 10 years	4	4	4	0.75	0.75	0.75	3	4	3	1	3	3	3	3	3	3	3	4	4	4	4	4	4	4	4	4	4	4	4	4	4	4	2	3	3	4	4	4	2	2	4	3	Falta de material de desgaste	Aprendizagem autónoma através de recursos como livros, cursos online ou investigação	2.75
1	4	1	Mestrado	More then 10 years	4	4	4	0.75	0.75	0.75	4	4	4	4	4	4	4	4	4	4	4	4	4	4	4	4	4	4	4	4	4	4	4	4	4	4	4	4	4	4	4	4	4	4	4	4	Falta de recursos	Ensino formal (cursos, seminários) para melhorar as competências profissionais	4
1	4	0	Ensino superior profissional (nível 2)	More then 10 years	5	4	5	1	0.75	1	4	3	4	1	4	4	4	3	4	4	2	2	4	4	4	1	4	4	1	1	2	3	4	4	2	3	1	3	3	3	1	4	2	4	2	2	Falta de recursos, Restrições de tempo	Ensino formal (cursos, seminários) para melhorar as competências profissionais	3
1	4	0	Atualmente a frequentar um curso de qualificação	6 - 10 years	4	4	4	0.75	0.75	0.75	4	4	4	4	4	4	4	4	4	4	4	4	4	4	4	4	4	4	4	4	4	3	4	4	4	4	4	4	4	4	4	4	4	4	4	4	Restrições de tempo	Conhecimentos adquiridos nos programas de estudo	4
1	4	0	Bacharelato	More then 10 years	4	4	4	0.75	0.75	0.75	4	3	4	4	4	2	2	4	2	2	4	2	4	2	2	2	4	4	2	2	4	2	4	4	3	2	2	4	4	4	4	4	4	4	4	4	Resistência dos colegas ou da instituição de ensino	Conhecimentos adquiridos através da colaboração com colegas, pessoal de apoio ou profissionais de outras áreas	3.75
1	4	0	Bacharelato	More then 10 years	4	4	4	0.75	0.75	0.75	2	4	4	4	4	4	4	4	4	4	4	4	4	4	4	4	4	4	4	4	4	4	4	4	4	4	4	4	4	4	4	4	4	4	4	4	Resistência dos colegas ou da instituição de ensino	Conhecimentos adquiridos nos programas de estudo	3.5
1	4	1	Mestrado	No experience	4	4	4	0.75	0.75	0.75	4	4	4	4	4	4	4	4	4	4	4	4	4	4	4	4	4	4	4	4	4	4	4	4	4	4	4	4	4	4	4	4	4	4	4	4	Falta de recursos	Conhecimentos adquiridos nos programas de estudo	4
1	4	0	Ensino superior profissional (nível 2)	More then 10 years	5	5	5	1	1	1	4	4	4	1	4	4	4	4	4	4	4	4	2	2	4	2	4	4	1	4	4	4	4	4	2	4	2	4	4	4	4	4	2	1	4	4	Restrições de tempo	Conhecimentos adquiridos nos programas de estudo, Ensino formal (cursos, seminários) para melhorar as competências profissionais, Conhecimentos adquiridos através da colaboração com colegas, pessoal de apoio ou profissionais de outras áreas	3.25
1	4	0	Mestrado	Less than 1 year	5	4	4	1	0.75	0.75	4	4	4	3	4	4	4	4	4	4	4	4	4	4	4	3	4	4	4	4	4	2	4	4	2	2	2	4	3	4	2	2	2	4	4	4	Falta de recursos, Restrições de tempo	Conhecimentos adquiridos nos programas de estudo	3.75
1	4	0	Ensino superior profissional (nível 1)	More then 10 years	5	5	5	1	1	1	2	2	2	1	2	2	2	4	4	2	2	2	2	2	2	2	2	2	2	2	2	2	2	2	2	4	1	2	2	2	1	2	2	4	2	2	Falta de recursos, Conhecimentos ou oportunidades de formação limitados	Nenhum conhecimento relevante	1.75
1	4	0	Mestrado	6 - 10 years	4	4	4	0.75	0.75	0.75	4	4	4	4	4	4	4	4	4	2	4	4	4	4	4	4	4	4	4	4	4	4	4	4	2	4	4	4	4	4	4	4	4	4	4	4	Falta de recursos	Conhecimentos adquiridos nos programas de estudo	4
1	4	0	Bacharelato	3-5 years	4	3	4	0.75	0.5	0.75	2	4	2	2	4	4	4	4	4	4	4	4	4	4	4	4	4	4	4	4	4	4	4	4	4	4	4	4	4	4	4	4	4	4	4	4	Restrições de tempo	Ensino formal (cursos, seminários) para melhorar as competências profissionais	2.5
2	4	0	Atualmente a frequentar um curso de qualificação	Less than 1 year	4	4	4	0.75	0.75	0.75	4	4	4	4	4	4	4	4	4	4	4	4	4	4	4	4	4	4	4	4	4	4	4	4	4	4	4	4	4	4	4	4	4	4	4	4	Resistência dos colegas ou da instituição de ensino	Conhecimentos adquiridos nos programas de estudo	4
1	4	0	Mestrado	6 - 10 years	4	4	4	0.75	0.75	0.75	4	4	4	4	4	4	4	4	4	4	4	4	4	4	4	4	4	4	4	4	4	4	4	4	4	4	4	4	4	4	4	4	4	4	4	4	Falta de recursos	Conhecimentos adquiridos nos programas de estudo, Ensino formal (cursos, seminários) para melhorar as competências profissionais	4
1	4	0	Mestrado	6 - 10 years	4	4	4	0.75	0.75	0.75	4	4	3	3	4	3	4	3	4	4	4	3	3	4	4	4	4	2	2	4	4	4	4	4	4	4	2	4	2	4	4	4	4	4	2	4	Falta de recursos	Conhecimentos adquiridos nos programas de estudo, Ensino formal (cursos, seminários) para melhorar as competências profissionais	3.5
1	4	0	Mestrado	6 - 10 years	4	4	5	0.75	0.75	1	4	4	4	3	4	4	2	4	4	4	2	4	4	4	4	4	4	4	4	2	4	4	4	4	4	4	4	4	4	4	4	4	4	4	4	4	Resistência dos colegas ou da instituição de ensino	Ensino formal (cursos, seminários) para melhorar as competências profissionais	3.75
1	4	0	Mestrado	6 - 10 years	4	4	4	0.75	0.75	0.75	4	4	4	3	4	2	3	2	3	4	4	4	4	4	2	2	4	4	4	4	4	4	4	4	2	4	4	4	4	3	4	4	4	4	4	4	Resistência dos colegas ou da instituição de ensino	Ensino formal (cursos, seminários) para melhorar as competências profissionais, Aprendizagem autónoma através de recursos como livros, cursos online ou investigação	3.75
																																																Valsts
																																																	Q_2.1.
																																																	#REF!
																																																	#REF!
																																																	#REF!
																																					St = 2, Valsts = 1
																																							Q_2.1.	Q_2.2.	Q_2.3.	Q_3.1.	Q_3.2.	Q_3.3.	Q_4.1.	Q_4.2.	Q_4.3.
																																						Mean	3.13	3.1	2.87	2.75	2.84	3.01	3.03	3.07	2.77
																																						Median	3.25	3.2	2.88	2.67	3	3	3	3	2.8
																																						SD	0.59	0.59	0.59	0.66	0.62	0.72	0.57	0.61	0.57
																																					St = 2, Valsts = 2
																																							Q_2.1.	Q_2.2.	Q_2.3.	Q_3.1.	Q_3.2.	Q_3.3.	Q_4.1.	Q_4.2.	Q_4.3.
																																						Mean	3.35	3.49	3.15	2.9	2.77	3.07	3.18	3.19	3.07
																																						Median	3.5	3.4	3.13	2.83	2.6	3	3	3.13	2.9
																																						SD	0.54	0.38	0.45	0.69	0.61	0.57	0.51	0.41	0.61
																																					St = 2, Valsts = 3
																																							Q_2.1.	Q_2.2.	Q_2.3.	Q_3.1.	Q_3.2.	Q_3.3.	Q_4.1.	Q_4.2.	Q_4.3.
																																						Mean	3.25	3.28	3.03	3	2.6	2.84	2.69	2.94	2.88
																																						Median	3.38	3.5	3	3	2.6	2.75	3	3.13	3
																																						SD	0.63	0.58	0.56	0.53	0.34	0.68	0.8	0.64	0.61
																																					St = 2, Valsts = 4
																																							Q_2.1.	Q_2.2.	Q_2.3.	Q_3.1.	Q_3.2.	Q_3.3.	Q_4.1.	Q_4.2.	Q_4.3.
																																						Mean	3.25	3.32	3.13	3.07	3.36	3.38	3.35	3.1	3.22
																																						Median	3.25	3.3	3	3	3.2	3.38	3.25	3	3.2
																																						SD	0.57	0.63	0.57	0.54	0.65	0.66	0.67	0.61	0.59
[truncated: 14 more columns]
