# Supplementary material
Source: Research Square preprint supplement (doi:10.21203/rs.3.rs-9452587/v1)
Supplement: Supplementary file 7 [file 9e8ec635fc19b6363d84be62.xlsx]

## Sheet: Sheet1
Name	Description	Values
Students_teachers	Student or educator	1 - Educator; 2 - Student
Country	Country	1 - Austria; 2 - Czech Republic; 3 - Latvia; 4 - Portugal
Gender	Gender	0 - Female; 1 - Male
Education	What is your highest level of academic qualification?	Currently obtaining a qualification; Professional higher education (Level 1); Bachelor’s degree; Professional higher education (Level 2); Master’s degree; Doctoral degree
Work_experience	1.4. Work experience (years):	No experience; Less than 1 year; 1-2 years; 3-5 years; 6 - 10 years; More than 10 years
Q_1.11_1	1.11. Please evaluate how important, in your opinion, the following UDL principle-based aspects are for promoting an inclusive learning environment: [Engaging children in activities using various methods]	1 – Not important; 2 – Rather not important; 3 – Neutral / no opinion; 4 – Rather important; 5 – Very important
Q_1.11_2	1.11. Please evaluate how important, in your opinion, the following UDL principle-based aspects are for promoting an inclusive learning environment: [Presenting information using different materials]	1 – Not important; 2 – Rather not important; 3 – Neutral / no opinion; 4 – Rather important; 5 – Very important
Q_1.11_3	1.11. Please evaluate how important, in your opinion, the following UDL principle-based aspects are for promoting an inclusive learning environment: [Expressing and assessing acquired knowledge in various ways]	1 – Not important; 2 – Rather not important; 3 – Neutral / no opinion; 4 – Rather important; 5 – Very important
Q_1_11_1_TRANFORMED_to_percent	Q_1.11_1 transformation. Formula used: (Q_1.11_1-1)/4	Number from 0 to 1
Q_1_11_2_TRANFORMED_to_percent	Q_1.11_2 transformation. Formula used: (Q_1.11_2-1)/4	Number from 0 to 1
Q_1_11_3_TRANFORMED_to_percent	Q_1.11_3 transformation. Formula used: (Q_1.11_3-1)/4	Number from 0 to 1
Q_2.1._1	2.1. Acceptance of interests and identities [2.1.1. Selecting learning goals and tasks based on children's unique interests, cultural context, gender, age, and abilities (e.g., giving choices on how to present the final result—drawing, sculpture, video, or audio)]	1- Never, 2 - Sometimes, 3 - Often, 4 - Always
Q_2.1._2	2.1. Acceptance of interests and identities [2.1.2. Activities based on play and hands-on experiences (e.g., role play and excursions in various environments—indoors and outdoors)]	1- Never, 2 - Sometimes, 3 - Often, 4 - Always
Q_2.1._3	2.1. Acceptance of interests and identities [2.1.3. Promoting joy in activities and tasks (e.g., using surprises or discoveries during activities)]	1- Never, 2 - Sometimes, 3 - Often, 4 - Always
Q_2.1._4	2.1. Acceptance of interests and identities [2.1.4. Creating an environment that recognizes children’s diverse emotional and sensory needs (e.g., exploring different ideas and questions and providing noise-canceling headphones or adapted lighting)]	1- Never, 2 - Sometimes, 3 - Often, 4 - Always
Q_2.2._1	2.2. Sustained effort and persistence [2.2.1. Explaining the purpose of activities (e.g., telling children why they are learning about sharing through board and role-playing games)]	1- Never, 2 - Sometimes, 3 - Often, 4 - Always
Q_2.2._2	2.2. Sustained effort and persistence [2.2.2. Providing different levels of challenge (e.g., offering tasks of varying difficulty and scope for different skill levels)]	1- Never, 2 - Sometimes, 3 - Often, 4 - Always
Q_2.2._3	2.2. Sustained effort and persistence [2.2.3. Encouraging teamwork (e.g., having children work together on projects or tasks)]	1- Never, 2 - Sometimes, 3 - Often, 4 - Always
Q_2.2._4	2.2. Sustained effort and persistence [2.2.4. Building a sense of belonging (e.g., sharing experiences related to the concepts being learned)]	1- Never, 2 - Sometimes, 3 - Often, 4 - Always
Q_2.2._5	2.2. Sustained effort and persistence [2.2.5. Providing specific, practical feedback (e.g., telling a child: "I like how you shared your toys with your friend!")]	1- Never, 2 - Sometimes, 3 - Often, 4 - Always
Q_2.3._1	2.3. Emotional skills [2.3.1. Understanding children's expectations and promoting motivation in activities (e.g., finding out what they will be able to read after learning literacy or what reward they will receive)]	1- Never, 2 - Sometimes, 3 - Often, 4 - Always
Q_2.3._2	2.3. Emotional skills [2.3.2. Developing emotional expression and self-regulation skills (e.g., expressing emotions using emojis or learning behavioral responses through role play)]	1- Never, 2 - Sometimes, 3 - Often, 4 - Always
Q_2.3._3	2.3. Emotional skills [2.3.3. Evaluating one's own performance and progress (e.g., creating charts of learned letters or pictograms over a period)]	1- Never, 2 - Sometimes, 3 - Often, 4 - Always
Q_2.3._4	2.3. Emotional skills [2.3.4. Modeling empathy through discussions or role play]	1- Never, 2 - Sometimes, 3 - Often, 4 - Always
Q_3.1._1	3.1. Perception [3.1.1. Adapting information presentation (e.g., digital tools with adjustable font size and color contrast)]	1- Never, 2 - Sometimes, 3 - Often, 4 - Always
Q_3.1._2	3.1. Perception [3.1.2. Providing information in multiple formats (e.g., videos, audio materials, and movement-based activities)]	1- Never, 2 - Sometimes, 3 - Often, 4 - Always
Q_3.1._3	3.1. Perception [3.1.3. Representing topics authentically (e.g., storytelling about different languages and cultures in a historical format)]	1- Never, 2 - Sometimes, 3 - Often, 4 - Always
Q_3.2._1	3.2. Language and symbols [3.2.1. Promoting understanding of words, symbols, and numbers in different formats (e.g., creating graphs and diagrams)]	1- Never, 2 - Sometimes, 3 - Often, 4 - Always
Q_3.2._2	3.2. Language and symbols [3.2.2. Promoting understanding of symbols and numbers through practical activities]	1- Never, 2 - Sometimes, 3 - Often, 4 - Always
Q_3.2._3	3.2. Language and symbols [3.2.3. Representing concepts using different cultures, languages, and dialects (e.g., explaining concepts in different languages and symbols)]	1- Never, 2 - Sometimes, 3 - Often, 4 - Always
Q_3.2._4	3.2. Language and symbols [3.2.4. Reducing bias regarding different languages and communication methods (e.g., learning symbols, expressions, words, and phrases in different languages)]	1- Never, 2 - Sometimes, 3 - Often, 4 - Always
Q_3.2._5	3.2. Language and symbols [3.2.5. Representing topics using different modes (e.g., video, graphics, and interactive activities)]	1- Never, 2 - Sometimes, 3 - Often, 4 - Always
Q_3.3._1	3.3. Knowledge construction [3.3.1. Connecting prior and new knowledge (e.g., linking existing knowledge about living beings to specific ecosystems)]	1- Never, 2 - Sometimes, 3 - Often, 4 - Always
Q_3.3._2	3.3. Knowledge construction [3.3.2. Comparing key concepts and relationships (e.g., comparing characteristics of animals)]	1- Never, 2 - Sometimes, 3 - Often, 4 - Always
Q_3.3._3	3.3. Knowledge construction [3.3.3. Recognizing diverse interests and identities (e.g., drawing different flags or comparing eye/hair colors)]	1- Never, 2 - Sometimes, 3 - Often, 4 - Always
Q_3.3._4	3.3. Knowledge construction [3.3.4. Linking topics and generalizing concepts (e.g., learning road signs during walks or exploring dogs of different breeds, colors, and sizes)]	1- Never, 2 - Sometimes, 3 - Often, 4 - Always
Q_4.1._1	4.1. Interaction [4.1.1. Ensuring access and predictability in different environments (e.g., using tactile, audio, symbolic, and color cues in the child’s surroundings)]	1- Never, 2 - Sometimes, 3 - Often, 4 - Always
Q_4.1._2	4.1. Interaction [4.1.2. Ensuring access to materials and assistive tools (e.g., using noise-canceling headphones, gardening gloves, and alternative communication tools)]	1- Never, 2 - Sometimes, 3 - Often, 4 - Always
Q_4.2._1	4.2. Expression and communication [4.2.1. Using different means of communication (e.g., allowing children to express ideas through art, music, or movement)]	1- Never, 2 - Sometimes, 3 - Often, 4 - Always
Q_4.2._2	4.2. Expression and communication [4.2.2. Providing various materials (e.g., using different materials to complete tasks)]	1- Never, 2 - Sometimes, 3 - Often, 4 - Always
Q_4.2._3	4.2. Expression and communication [4.2.3. Providing support and gradually reducing it (e.g., using verbal, visual, and physical support and gradually reducing it)]	1- Never, 2 - Sometimes, 3 - Often, 4 - Always
Q_4.2._4	4.2. Expression and communication [4.2.4. Using different speech and expression methods (e.g., different languages or alternative communication tools)]	1- Never, 2 - Sometimes, 3 - Often, 4 - Always
Q_4.3._1	4.3. Development of strategic thinking [4.3.1. Setting meaningful goals with children (e.g., setting goals to learn three new words per week through different activities)]	1- Never, 2 - Sometimes, 3 - Often, 4 - Always
Q_4.3._2	4.3. Development of strategic thinking [4.3.2. Anticipating activity challenges (e.g., visiting a library and anticipating possible difficulties along the way or at the location)]	1- Never, 2 - Sometimes, 3 - Often, 4 - Always
Q_4.3._3	4.3. Development of strategic thinking [4.3.3. Organizing resources and information (e.g., labeling materials and furniture)]	1- Never, 2 - Sometimes, 3 - Often, 4 - Always
Q_4.3._4	4.3. Development of strategic thinking [4.3.4. Evaluating one’s progress or self-reflection on acquired skills (e.g., using charts or tables to track learned concepts, letters, and ideas)]	1- Never, 2 - Sometimes, 3 - Often, 4 - Always
Q_4.3._5	4.3. Development of strategic thinking [4.3.5. Promoting inclusive practices (e.g., learning about different cultural celebrations or traditions)]	1- Never, 2 - Sometimes, 3 - Often, 4 - Always
Q_5.1._1	5.1. What challenges do you face when trying to include different engagement, representation, or action and expression strategies and methods?	Lack of resources; Limited knowledge or training opportunities; Time constraints; Resistance from colleagues or educational institutions; Other
Q_5.2._1	5.2. What specific professional development opportunities or support have you received related to learning UDL-based methods and strategies to promote inclusive education practices?	Knowledge acquired during studies; Formal education (courses, diplomas) for professional competence development; Self-acquired knowledge using resources such as books, online courses, or research; Knowledge gained through collaboration with colleagues, support staff, or professionals from other sectors; No relevant knowledge; Other
Q_2.1.	The arithmetic mean of Q_2.1._1; Q_2.1._2; Q_2.1._3; Q_2.1._4	Values from 1 to 4
Q_2.2.	The arithmetic mean of Q_2.2._1; Q_2.2._2; Q_2.2._3; Q_2.2._4;Q_2.2._5	Values from 1 to 4
Q_2.3.	The arithmetic mean of Q_2.3._1; Q_2.3._2; Q_2.3._3; Q_2.3._4	Values from 1 to 4
Q_3.1.	The arithmetic mean of Q_3.1._1; Q_3.1._2; Q_3.1._3	Values from 1 to 4
Q_3.2.	The arithmetic mean of Q_3.2._1; Q_3.2._2; Q_3.2._3; Q_3.2._4; Q_3.2._5	Values from 1 to 4
Q_3.3.	The arithmetic mean of Q_3.3._1; Q_3.3._2; Q_3.3._3; Q_3.3._4	Values from 1 to 4
Q_4.1.	The arithmetic mean of Q_4.1._1; Q_4.1._2	Values from 1 to 4
Q_4.2.	The arithmetic mean of Q_4.2._1; Q_4.2._2; Q_4.2._3; Q_4.2._4	Values from 1 to 4
Q_4.3.	The arithmetic mean of Q_4.3._1; Q_4.3._2; Q_4.3._3; Q_4.3._4; Q_4.3._5	Values from 1 to 4
UDL_Q_2	The arithmetic mean of all Q2 questions	Values from 1 to 4
UDL_Q_3	The arithmetic mean of all Q3 questions	Values from 1 to 4
UDL_Q_4	The arithmetic mean of all Q4 questions	Values from 1 to 4
UDL_Q_2__TRANFORMED_to_percent	UDL_Q_2 transformation. Formula used: (UDL_Q_2-1)/3	Values from 0 to 1
UDL_Q_3__TRANFORMED_to_percent	UDL_Q_3 transformation. Formula used: (UDL_Q_3-1)/3	Values from 0 to 1
UDL_Q_4__TRANFORMED_to_percent	UDL_Q_4 transformation. Formula used: (UDL_Q_4-1)/3	Values from 0 to 1
