# Supplementary material
Source: Research Square preprint supplement (doi:10.21203/rs.3.rs-9452587/v1)
Supplement: Supplementary file 8 [file e00088696bbbafb225580aaa.xlsx]

## Sheet: Sheet1
Timestamp	1.1. Země/ Land/ Země/ País	1.2. Pohlaví	1.3. Jaké je vaše nejvyšší dosažené vzdělání?	1.4. Pracovní zkušenosti v předškolním vzdělávání (v letech):	1.5. Místo výkonu práce:	1.6. Jak hodnotíte předškolní vzdělávací zařízení nebo dětskou skupinu, ve kterém pracujete, z hlediska zavádění inkluzivních vzdělávacích postupů?	1.7. Věková kategorie dětí, se kterými denně pracujete:	1.8. Kolik dětí je v současné době zapsáno do vaší třídy/skupiny?	1.9. Kolik učitelů, pomocných učitelů, chův nebo asistentů pracuje denně ve vaší třídě/skupině?	1.10. Kolik dětí ve vaší třídě/skupině má speciální individuální vzdělávací plán nebo přístup?	1.11. Zhodnoťte význam následujících aspektů založených na univerzálních principech pro učení při podpoře inkluzivního vzdělávacího prostředí: [Zapojení dětí do aktivit prostřednictvím různých vzdělávacích metod]	1.11. Zhodnoťte význam následujících aspektů založených na univerzálních principech pro učení při podpoře inkluzivního vzdělávacího prostředí: [Prezentace informací pomocí různých materiálů]	1.11. Zhodnoťte význam následujících aspektů založených na univerzálních principech pro učení při podpoře inkluzivního vzdělávacího prostředí: [Vyjadřování a hodnocení získaných znalostí různými prostředky]	1.12. Abyste mohli odpovědět na otázky v následující části a zhodnotit metody a strategie výuky, které využíváte, uveďte prosím svou současnou pozici:	2.1. Vítané zájmy a podpora identity: [2.1.1. Výběr výukových cílů a úkolů na základě jedinečných zájmů, kulturního kontextu, pohlaví, věkové skupiny a schopností dětí (např. možnost volby zobrazení výsledků v kresbě, soše, videu nebo zvukové podobě)]	2.1. Vítané zájmy a podpora identity: [2.1.2. Aktivity založené na hře a praktických zkušenostech (např. hraní rolí a výlety do různých prostředí - venku i uvnitř)]	2.1. Vítané zájmy a podpora identity: [2.1.3. Podpora radosti z prováděných činností a úkolů (např. využívání překvapení nebo objevů během činností)]	2.1. Vítané zájmy a podpora identity: [2.1.4. Vytvoření prostředí, které zohledňuje různé emocionální a smyslové potřeby dítěte (např. zkoumání různých myšlenek a otázek a poskytnutí sluchátek s potlačením hluku nebo upraveného osvětlení)]	2.2. Dlouhodobé úsilí a vytrvalost [2.2.1. Vysvětlení účelu aktivit (např. vysvětlení, proč se děti učí o sdílení prostřednictvím stolních her a hraní rolí)]	2.2. Dlouhodobé úsilí a vytrvalost [2.2.2. Poskytování různých úrovní náročnosti (např. nabídka úkolů různé obtížnosti a složitosti pro různé úrovně dovedností)]	2.2. Dlouhodobé úsilí a vytrvalost [2.2.3. Podpora týmové práce (např. povzbuzování dětí ke společné práci na projektech nebo úkolech)]	2.2. Dlouhodobé úsilí a vytrvalost [2.2.4. Podpora pocitu sounáležitosti (např. sdílení zkušeností souvisejících s vyučovanými pojmy)]	2.2. Dlouhodobé úsilí a vytrvalost [2.2.5. Poskytování konkrétní, praktické zpětné vazby (např. když dítěti řeknete: "Líbí se mi, jak ses rozdělil o své hračky s kamarádem!")]	2.3. Emocionální kapacita [2.3.1. Uvědomění si očekávání dětí a podpora motivace při činnostech (např. určení, co budou umět přečíst, až se naučí číst a psát, nebo jaká bude odměna za splnění úkolu)]	2.3. Emocionální kapacita [2.3.2. Rozvoj schopnosti vyjadřovat emoce a seberegulace (např. vyjadřování emocí pomocí emotikonů nebo učení se reakcím na chování prostřednictvím hraní rolí)]	2.3. Emocionální kapacita [2.3.3. Hodnocení vlastního výkonu a pokroku (např. vytváření tabulek pro sledování počtu naučených písmen nebo symbolů za určité období)]	2.3. Emocionální kapacita [2.3.4. Modelování empatie prostřednictvím diskusí a hraní rolí (např. pomocí diskusí nebo hraní rolí podporovat empatické porozumění)]	3.1. Vnímání [3.1.1. Přizpůsobení zobrazení informací (např. digitální nástroje s úpravou velikosti písma a barevného kontrastu)]	3.1. Vnímání [3.1.2. Poskytování informací různými formami (např. pomocí videí, zvukových materiálů a pohybových aktivit)]	3.1. Vnímání [3.1.3. Představení tématu autentickým způsobem (např. vyprávění o různých jazycích a kulturách v historickém kontextu)]	3.2. Jazyk a symboly [3.2.1. Podpora porozumění slovům, symbolům a číslům v různých formátech (např. vytváření grafů a tabulek)]	3.2. Jazyk a symboly [3.2.2. Zlepšení porozumění symbolům a číslům prostřednictvím praktických činností]	3.2. Jazyk a symboly [3.2.3. Reflexe pojmů prostřednictvím různých kultur, jazyků a dialektů (např. vysvětlování pojmů v různých jazycích a symbolech)]	3.2. Jazyk a symboly [3.2.4. Odstraňování stereotypů o různých jazycích a komunikačních prostředcích (např. učení se symbolům a výrazovým prostředkům, slovům a frázím v různých jazycích)]	3.2. Jazyk a symboly [3.2.5. Představení tématu pomocí různých způsobů znázornění (např. pomocí videí, grafů a interaktivních aktivit)]	3.3. Budování znalostí [3.3.1. Propojení stávajících a získaných znalostí (např. propojení stávajících znalostí o živých organismech s konkrétními ekosystémy)]	3.3. Budování znalostí [3.3.2. Porovnávání základních pojmů a vztahů (např. porovnávání charakteristických znaků zvířat)]	3.3. Budování znalostí [3.3.3. Rozpoznávání různých zájmů a identit (např. kreslení různých vlajek nebo porovnávání různých barev očí a vlasů)]	3.3. Budování znalostí [3.3.4. Vztahování témat a zobecňování pojmů (např. poznávání dopravních značek během procházky nebo zkoumání různých plemen, barev a velikostí psů)]	4.1. Interakce [4.1.1. Zajištění porozumění a předvídatelnosti v různých prostředích (např. pomocí hmatových, sluchových, symbolických a barevných signálů v okolí dítěte)]	4.1. Interakce [4.1.2. Zajištění přístupu k materiálům a nástrojům (např. sluchátka s potlačením hluku, zahradnické rukavice a alternativní komunikační nástroje)]	4.2. Vyjadřování a komunikace [4.2.1. Využívání různých komunikačních prostředků (např. umožnění dětem vyjádřit své myšlenky prostřednictvím umění, hudby nebo pohybu)]	4.2. Vyjadřování a komunikace [4.2.2. Poskytování různých materiálů (např. používání různých materiálů při plnění úkolů)]	4.2. Vyjadřování a komunikace [4.2.3. Poskytování podpory a její postupné snižování (např. používání slovní a vizuální fyzické podpory, která se postupně snižuje)]	4.2. Vyjadřování a komunikace [4.2.4. Používání různých řečových a vyjadřovacích prostředků (např. různých jazyků nebo alternativních komunikačních metod)]	4.3. Vývoj strategie [4.3.1. Stanovení smysluplných cílů společně s dětmi (např. stanovení cíle naučit se během týdne tři nová slova prostřednictvím různých aktivit)]	4.3. Vývoj strategie [4.3.2. Předvídání problémů při činnostech (např. plánování návštěvy knihovny a předvídání možných potíží na cestě nebo v knihovně)]	4.3. Vývoj strategie [4.3.3. Organizace zdrojů a informací (např. označování materiálů a nábytku)]	4.3. Vývoj strategie [4.3.4. Sebehodnocení pokroku nebo sebereflexe získaných dovedností (např. používání grafů nebo tabulek pro naučené pojmy, písmena a myšlenky)]
5/19/2025 17:26:15	Česká republika	Žena	Doktorský titul	Více než 10 let	Ve městě	Inkluzivní (instituce realizuje speciální vzdělávací programy)	1 - 3 roky, 3 - 5 let	16 - 20 dětí	2 - 4	1 - 2 děti	Velmi důležité	Velmi důležité	Velmi důležité	Učitel	Často	Vždy	Vždy	Často, Vždy	Často	Často	Často	Často	Často	Často	Často	Někdy	Často	Někdy	Často	Často	Často	Často	Někdy	Často	Často	Často	Často	Někdy	Často	Často	Často	Často	Často	Často	Někdy	Často	Často	Často	Často
5/19/2025 20:30:16	Česká republika	Žena	Magisterský titul	3 - 5 let	Ve městě	Inkluzivní (instituce realizuje speciální vzdělávací programy)	3 - 5 let, Smíšené věkové skupiny	21 - 25 dětí	2 - 4	3 - 5 děti	Velmi důležité	Velmi důležité	Poměrně důležité	Učitel	Často	Často	Vždy	Někdy	Vždy	Často	Vždy	Vždy	Někdy	Někdy	Často	Často	Často	Často	Vždy	Vždy	Často	Často	Nikdy	Někdy	Často	Často	Vždy	Vždy	Vždy	Často	Často	Někdy	Vždy	Často	Někdy	Často	Vždy	Někdy	Často
5/19/2025 21:34:09	Česká republika	Žena	Magisterský titul	6 - 10 let	Ve městě	Inkluzivní (instituce realizuje speciální vzdělávací programy)	Smíšené věkové skupiny	21 - 25 dětí	1 - 2	3 - 5 děti	Velmi důležité	Poměrně důležité	Velmi důležité	Učitel	Často	Často	Někdy	Vždy	Často	Vždy	Často	Často	Vždy	Někdy	Často	Vždy	Někdy	Někdy	Vždy	Vždy	Často	Někdy	Často	Někdy	Vždy	Často	Často	Často	Často	Vždy	Často	Často	Vždy	Vždy	Vždy	Často	Často	Vždy	Často
5/19/2025 22:52:40	Česká republika	Žena	Středoškolské vzdělání (úroveň 1)	Více než 10 let	Ve městě	Inkluzivní (instituce realizuje speciální vzdělávací programy)	3 - 5 let	21 - 25 dětí	1 - 2	3 - 5 děti	Velmi důležité	Velmi důležité	Velmi důležité	Učitel	Často	Často	Často	Často	Často	Vždy	Často	Často	Často	Často	Často	Často	Často	Někdy	Někdy	Často	Často	Často	Někdy	Někdy	Někdy	Často	Často	Někdy	Často	Často	Často	Často	Často	Často	Často	Často	Někdy	Nikdy	Často
5/20/2025 16:40:00	Česká republika	Žena	Magisterský titul	Více než 10 let	Ve městě	Neinkluzivní (instituce nerealizuje speciální vzdělávací programy)	Smíšené věkové skupiny	21 - 25 dětí	1 - 2	Žádné	Poměrně důležité	Poměrně důležité	Poměrně důležité	Učitel	Nikdy	Často	Často	Někdy	Někdy	Vždy	Často	Často	Často	Někdy	Někdy	Někdy	Někdy	Nikdy	Často	Někdy	Nikdy	Někdy	Nikdy	Nikdy	Někdy	Někdy	Často	Často	Často	Často	Nikdy	Často	Vždy	Často	Nikdy	Někdy	Často	Nikdy	Nikdy
5/21/2025 11:42:02	Česká republika	Žena	Magisterský titul	Více než 10 let	Ve městě	Inkluzivní (instituce realizuje speciální vzdělávací programy)	Smíšené věkové skupiny	21 - 25 dětí	1 - 2	3 - 5 děti	Velmi důležité	Velmi důležité	Velmi důležité	Učitel	Vždy	Vždy	Vždy	Vždy	Vždy	Vždy	Vždy	Vždy	Vždy	Vždy	Vždy	Vždy	Vždy	Často	Často	Vždy	Často	Často	Často	Často	Často	Často	Často	Často	Často	Někdy, Často	Někdy, Často	Někdy	Někdy	Někdy	Někdy	Často	Někdy	Někdy	Často
5/21/2025 11:46:36	Česká republika	Žena	Magisterský titul	Více než 10 let	Ve městě	Inkluzivní (instituce realizuje speciální vzdělávací programy)	6 - 8 let	21 - 25 dětí	1 - 2	3 - 5 děti	Velmi důležité	Poměrně důležité	Velmi důležité	Učitel	Někdy	Vždy	Vždy	Někdy	Často	Často	Často	Často	Často	Často	Někdy	Někdy	Někdy	Často	Často	Často	Někdy	Často	Někdy	Často	Vždy	Vždy	Často	Často	Často	Často	Vždy	Často	Vždy	Vždy	Vždy	Vždy	Vždy	Často	Vždy
5/21/2025 14:11:55	Česká republika	Žena	Magisterský titul	Více než 10 let	Ve městě	Inkluzivní (instituce realizuje speciální vzdělávací programy)	6 - 8 let	21 - 25 dětí	1 - 2	1 - 2 děti	Velmi důležité	Velmi důležité	Velmi důležité	Učitel	Často	Často	Často	Často	Často	Často	Často	Často	Často	Někdy	Často	Vždy	Někdy	Vždy	Často	Někdy	Někdy	Často	Nikdy	Někdy	Často	Často	Často	Někdy	Často	Často	Někdy	Někdy	Často	Často	Někdy	Vždy	Často	Často	Vždy
5/21/2025 14:29:34	Česká republika	Žena	Magisterský titul	Méně než jeden rok	Ve městě	Inkluzivní (instituce realizuje speciální vzdělávací programy)	6 - 8 let	21 - 25 dětí	1 - 2	1 - 2 děti	Velmi důležité	Velmi důležité	Poměrně důležité	Učitel	Často	Často	Vždy	Často	Vždy	Často	Vždy	Vždy	Vždy	Vždy	Často	Často	Často	Často	Často	Často	Často	Často	Často	Někdy	Často	Vždy	Vždy	Vždy	Vždy	Často	Někdy	Někdy	Často	Někdy	Někdy	Někdy	Často	Někdy	Často
5/21/2025 14:49:28	Česká republika	Žena	Magisterský titul	Bez zkušeností	Ve městě									Učitel
5/21/2025 15:52:15	Česká republika	Žena	Středoškolské vzdělání (úroveň 1)	Více než 10 let	Ve městě	Inkluzivní (instituce realizuje speciální vzdělávací programy)	Smíšené věkové skupiny	16 - 20 dětí	1 - 2	3 - 5 děti	Velmi důležité	Velmi důležité	Velmi důležité	Učitel	Často	Vždy	Vždy	Vždy	Často	Často	Často	Vždy	Vždy	Často	Vždy	Často	Často	Často	Často	Často	Často	Často	Někdy	Často	Často	Často	Často	Často	Často	Často	Někdy	Často	Často	Často	Často	Často	Často	Často	Často
5/21/2025 16:54:03	Česká republika	Žena	Magisterský titul	Bez zkušeností	Ve městě	Jiný	Jiný	21 - 25 dětí	Jiný	3 - 5 děti	Velmi důležité	Velmi důležité	Poměrně důležité	Učitel	Často	Někdy	Často	Často	Často	Často	Často	Často	Často	Často	Často	Často	Často	Někdy	Někdy	Někdy	Někdy	Někdy	Často	Někdy	Často	Nikdy	Někdy	Někdy	Někdy	Někdy	Nikdy	Někdy	Často	Často	Nikdy	Často	Někdy	Někdy	Někdy
5/21/2025 16:55:17	Česká republika	Žena	Magisterský titul	3 - 5 let	Ve městě	Inkluzivní (instituce realizuje speciální vzdělávací programy)	Smíšené věkové skupiny	16 - 20 dětí	2 - 4		Velmi důležité	Velmi důležité	Velmi důležité	Učitel	Vždy	Vždy	Vždy	Vždy	Vždy	Vždy	Vždy	Vždy	Vždy	Vždy	Vždy	Vždy	Vždy	Často	Často	Často	Často	Často	Často	Často	Často	Často	Často	Často	Často	Často	Často	Často	Často	Často	Často	Často	Často	Často	Často
5/21/2025 17:04:38	Česká republika, Latvija	Žena	Magisterský titul	Více než 10 let	Ve městě	Inkluzivní (instituce realizuje speciální vzdělávací programy)	6 - 8 let, Smíšené věkové skupiny	21 - 25 dětí	1 - 2	1 - 2 děti	Velmi důležité	Velmi důležité	Velmi důležité	Učitel	Vždy	Často, Vždy	Vždy	Vždy	Vždy	Často	Často	Často	Vždy	Často	Někdy	Často	Někdy	Někdy	Někdy	Často	Často, Vždy	Často, Vždy	Často	Vždy	Často	Vždy	Vždy	Vždy	Vždy	Často	Často	Často	Často	Někdy	Často	Často	Vždy	Vždy	Vždy
5/21/2025 17:49:53	Česká republika	Žena	Středoškolské vzdělání (úroveň 1)	Více než 10 let	Ve městě	Neinkluzivní (instituce nerealizuje speciální vzdělávací programy)	3 - 5 let	21 - 25 dětí	1 - 2	Více než 5 dětí	Velmi důležité	Poměrně důležité	Poměrně důležité	Učitel	Vždy	Vždy	Často	Vždy	Často	Často	Často	Vždy	Vždy	Často	Vždy	Vždy	Někdy	Vždy	Často	Někdy	Nikdy	Někdy	Někdy	Často	Často	Často	Někdy	Často	Někdy	Často	Někdy	Někdy	Vždy	Vždy	Někdy	Vždy	Vždy	Často	Vždy
5/21/2025 19:37:35	Česká republika	Žena	Magisterský titul	6 - 10 let	Ve městě	Inkluzivní (instituce realizuje speciální vzdělávací programy)	6 - 8 let	16 - 20 dětí	1 - 2	3 - 5 děti	Velmi důležité	Velmi důležité	Velmi důležité	Učitel	Často	Často	Často	Často	Vždy	Často	Vždy	Často	Vždy	Často	Často	Často	Často, Vždy	Často	Často	Často	Někdy	Často	Někdy	Někdy, Často	Často	Často	Často	Často	Často	Někdy	Někdy, Často	Často	Často	Často, Vždy	Často	Často	Často	Často	Často
5/22/2025 8:40:54	Česká republika	Žena	Magisterský titul	Bez zkušeností	Ve městě	Jiný	Jiný	26 a více dětí	1 - 2	3 - 5 děti	Neutrální, bez názoru	Neutrální, bez názoru	Neutrální, bez názoru	Učitel	Často	Často	Často	Vždy	Často	Často	Často	Často	Často	Někdy	Často	Často	Často	Často	Často	Často	Někdy	Často	Někdy	Někdy	Někdy	Často	Často	Někdy	Často	Někdy	Někdy	Vždy	Vždy	Často	Často	Často	Často	Často	Vždy
5/22/2025 13:31:27	Česká republika	Žena	Magisterský titul	Více než 10 let	Ve městě	Inkluzivní (instituce realizuje speciální vzdělávací programy)	3 - 5 let	21 - 25 dětí	1 - 2	1 - 2 děti	Poměrně důležité	Poměrně důležité	Poměrně důležité	Učitel	Často	Vždy	Často	Vždy	Vždy	Vždy	Často	Vždy	Vždy	Často	Vždy	Někdy	Vždy	Často	Často	Vždy	Často	Často, Vždy	Někdy	Vždy	Často	Často	Často	Vždy	Vždy	Často	Někdy	Často	Často	Vždy	Někdy	Často	Vždy	Často	Nikdy
5/23/2025 20:56:30	Česká republika	Žena	Magisterský titul	Více než 10 let	Ve městě	Inkluzivní (instituce realizuje speciální vzdělávací programy)	6 - 8 let	11 - 15 dětí	1 - 2	Žádné	Velmi důležité	Velmi důležité	Velmi důležité	Učitel	Často	Často	Často	Často	Často	Často	Často	Často	Často	Často	Často	Často	Často	Často	Často	Často	Často	Často	Často	Někdy	Často	Někdy	Často	Někdy	Často	Často	Často	Často	Často	Často	Často	Často	Často	Často	Často
5/23/2025 21:05:52	Česká republika	Žena	Magisterský titul	Více než 10 let	Ve městě	Inkluzivní (instituce realizuje speciální vzdělávací programy)	3 - 5 let, 6 - 8 let	21 - 25 dětí	1 - 2	3 - 5 děti	Velmi důležité	Poměrně důležité	Poměrně důležité	Učitel	Často	Často	Často	Někdy	Často	Často	Vždy	Vždy	Často	Často	Vždy	Často	Vždy	Často	Vždy	Často	Často	Vždy	Někdy	Někdy	Vždy	Často	Často	Někdy	Často	Často	Někdy	Často	Vždy	Vždy	Často	Někdy	Často	Často	Vždy
5/25/2025 23:00:37	Česká republika	Žena	Magisterský titul	Méně než jeden rok	Ve městě	Inkluzivní (instituce realizuje speciální vzdělávací programy)	6 - 8 let	21 - 25 dětí	Jiný	Více než 5 dětí	Velmi důležité	Velmi důležité	Velmi důležité	Učitel	Často	Často	Často	Někdy	Často	Často	Vždy	Vždy	Vždy	Často	Často	Často	Někdy, Často	Někdy	Vždy	Někdy	Často	Často	Často	Vždy	Někdy	Někdy	Často	Vždy	Vždy	Často	Někdy	Často	Často	Často	Často	Často	Vždy	Často	Někdy
5/27/2025 8:40:52	Česká republika	Žena	Bakalářský titul	Bez zkušeností	Ve venkovské oblasti	Inkluzivní (instituce realizuje speciální vzdělávací programy)	Smíšené věkové skupiny	21 - 25 dětí	1 - 2	1 - 2 děti	Poměrně důležité	Poměrně důležité	Poměrně důležité	Učitel před nástupem do zaměstnání	Někdy	Často	Často	Někdy	Často	Často	Vždy	Často	Vždy	Často	Vždy	Často	Často	Často	Často	Často	Vždy	Často	Často	Vždy	Často	Často	Často	Často	Vždy	Často	Někdy	Vždy	Často	Někdy	Často	Často	Vždy	Často	Někdy
5/27/2025 15:38:05	Česká republika	Žena	Středoškolské vzdělání (úroveň 1)	Více než 10 let	V malém městě (městys)	Neinkluzivní (instituce nerealizuje speciální vzdělávací programy)	3 - 5 let	21 - 25 dětí	1 - 2	1 - 2 děti	Poměrně důležité	Velmi důležité	Poměrně důležité	Učitel	Často	Často	Někdy	Nikdy	Často	Často	Vždy	Často	Vždy	Často	Často	Někdy	Často	Někdy	Někdy	Někdy	Nikdy	Někdy	Někdy	Někdy	Často	Někdy	Často	Někdy	Někdy	Někdy	Nikdy	Často	Často	Často	Často	Často	Vždy	Často	Nikdy
5/27/2025 20:45:03	Česká republika	Žena	Středoškolské vzdělání (úroveň 1)	Bez zkušeností	Jiný	Jiný	Jiný	Jiný	Jiný	Jiný	Velmi důležité	Poměrně důležité	Velmi důležité	Student
5/28/2025 16:50:30	Česká republika	Žena	Bakalářský titul	3 - 5 let	Ve městě	Inkluzivní (instituce realizuje speciální vzdělávací programy)	3 - 5 let	16 - 20 dětí	1 - 2	1 - 2 děti	Poměrně důležité	Poměrně důležité	Neutrální, bez názoru	Učitel	Někdy	Často	Často	Někdy	Někdy	Vždy	Často	Někdy	Často	Nikdy	Často	Často	Často	Někdy	Někdy	Někdy	Nikdy	Někdy	Nikdy	Nikdy	Často	Někdy	Někdy	Někdy	Někdy	Často	Nikdy	Někdy	Někdy	Někdy	Někdy	Někdy	Často	Často	Často
5/28/2025 18:32:51	Česká republika	Žena	Magisterský titul	3 - 5 let	Ve venkovské oblasti	Inkluzivní (instituce realizuje speciální vzdělávací programy)	1 - 3 roky, 3 - 5 let, 6 - 8 let, Smíšené věkové skupiny	16 - 20 dětí	1 - 2	1 - 2 děti	Velmi důležité	Velmi důležité	Velmi důležité	Učitel	Často	Vždy	Vždy	Často	Někdy	Vždy	Vždy	Vždy	Vždy	Někdy	Vždy	Vždy	Vždy	Někdy	Často	Často	Často	Vždy	Někdy	Nikdy	Vždy	Vždy	Vždy	Často	Vždy	Vždy	Vždy	Vždy	Vždy	Vždy	Někdy	Někdy	Vždy	Vždy	Vždy
5/28/2025 19:44:49	Česká republika	Žena	V současné době pokračuji v získávání kvalifikace předškolní pedagog	1 - 2 roky	Ve městě	Inkluzivní (instituce realizuje speciální vzdělávací programy)	3 - 5 let	21 - 25 dětí	1 - 2	Žádné	Velmi důležité	Velmi důležité	Velmi důležité	Učitel	Často	Často, Vždy	Často	Vždy	Často	Vždy	Vždy	Vždy	Vždy	Často	Vždy	Vždy	Často	Často	Vždy	Vždy	Často	Někdy	Někdy	Někdy	Někdy	Někdy	Často	Někdy	Často	Nikdy	Někdy	Často	Často	Někdy	Někdy	Často	Často	Často	Někdy
5/28/2025 20:13:27	Česká republika	Žena	Bakalářský titul	1 - 2 roky	Ve městě	Inkluzivní (instituce realizuje speciální vzdělávací programy)	3 - 5 let	21 - 25 dětí	1 - 2	1 - 2 děti	Poměrně důležité	Poměrně důležité	Neutrální, bez názoru	Učitel před nástupem do zaměstnání	Nikdy	Někdy	Často	Někdy	Někdy	Často	Často	Často	Často	Často	Někdy	Někdy	Často	Nikdy	Často	Někdy	Někdy	Často	Někdy	Někdy	Často	Často	Často	Někdy	Někdy	Často	Někdy	Často	Často	Někdy	Někdy	Někdy	Často	Často	Někdy
5/28/2025 20:25:03	Česká republika	Žena	Bakalářský titul	Méně než jeden rok	Ve venkovské oblasti	Neinkluzivní (instituce nerealizuje speciální vzdělávací programy)	3 - 5 let	16 - 20 dětí	2 - 4	1 - 2 děti	Poměrně důležité	Velmi důležité	Velmi důležité	Učitel	Nikdy	Někdy	Často	Někdy	Nikdy	Někdy	Často	Vždy	Vždy	Někdy	Někdy	Nikdy	Nikdy	Nikdy	Nikdy	Nikdy	Nikdy	Někdy	Nikdy	Nikdy	Často	Často	Někdy	Často	Někdy	Nikdy	Nikdy	Nikdy	Často	Často	Někdy	Nikdy	Někdy	Nikdy	Nikdy
5/29/2025 9:04:07	Česká republika	Žena	Bakalářský titul	6 - 10 let	V malém městě (městys)	Inkluzivní (instituce realizuje speciální vzdělávací programy)	Smíšené věkové skupiny	21 - 25 dětí	2 - 4	3 - 5 děti	Velmi důležité	Poměrně důležité	Poměrně důležité	Učitel	Často	Často	Často	Často	Často	Často	Často	Často	Často	Často	Často	Často	Často	Často	Často	Často	Často	Často	Často	Často	Často	Často	Často	Často	Často	Často	Často	Často	Často	Často	Často	Často	Často	Často	Často
5/29/2025 14:03:13	Česká republika	Žena	Středoškolské vzdělání (úroveň 1)	Více než 10 let	Ve městě	Inkluzivní (instituce realizuje speciální vzdělávací programy)	3 - 5 let, 6 - 8 let	21 - 25 dětí	1 - 2	3 - 5 děti	Velmi důležité	Poměrně důležité	Poměrně důležité	Učitel	Často	Často	Často	Často	Vždy	Často	Často	Často	Vždy	Často	Často	Často	Často	Někdy	Často	Někdy	Někdy	Často	Někdy	Někdy	Často	Často	Často	Často	Často	Často	Často	Často	Často	Často	Někdy	Často	Vždy	Často	Někdy
5/29/2025 20:28:36	Česká republika	Žena	Bakalářský titul	6 - 10 let	Ve městě	Inkluzivní (instituce realizuje speciální vzdělávací programy)	Smíšené věkové skupiny	21 - 25 dětí	1 - 2, 2 - 4	3 - 5 děti	Velmi důležité	Poměrně důležité	Neutrální, bez názoru	Učitel	Někdy	Často	Často	Nikdy	Nikdy	Někdy	Často	Někdy	Často	Někdy	Někdy	Někdy	Někdy	Nikdy	Často	Někdy	Nikdy	Někdy	Nikdy	Nikdy	Nikdy	Často	Často	Často	Často	Nikdy	Nikdy	Často	Často	Často	Nikdy	Nikdy	Často	Někdy	Někdy
5/30/2025 7:28:57	Česká republika	Žena	Magisterský titul	Více než 10 let	Ve městě	Inkluzivní (instituce realizuje speciální vzdělávací programy)	3 - 5 let, 6 - 8 let	11 - 15 dětí	1 - 2	Více než 5 dětí	Poměrně důležité	Poměrně důležité	Poměrně důležité	Učitel	Někdy	Vždy	Vždy	Někdy	Často	Vždy	Často	Vždy	Vždy	Někdy	Vždy	Nikdy	Někdy	Nikdy	Někdy	Někdy	Nikdy, Někdy	Vždy	Někdy	Někdy	Vždy	Vždy	Vždy	Vždy	Vždy	Vždy	Často	Často	Vždy	Vždy	Vždy	Vždy	Často	Často	Často
5/30/2025 17:41:17	Česká republika	Žena	Vyšší odborné vzdělání (úroveň 2)	Více než 10 let	Ve městě	Neinkluzivní (instituce nerealizuje speciální vzdělávací programy)	1 - 3 roky	11 - 15 dětí	2 - 4	Žádné	Velmi důležité	Spíše není důležité, Poměrně důležité	Velmi důležité	Chůva	Často	Vždy	Často, Vždy	Často	Někdy	Často	Často	Často	Někdy	Někdy	Někdy	Nikdy	Nikdy	Někdy	Často	Nikdy	Nikdy	Někdy	Nikdy	Nikdy	Často	Často	Někdy	Někdy	Někdy	Někdy	Někdy	Často	Často	Často	Nikdy	Nikdy	Někdy	Nikdy	Nikdy
5/30/2025 17:45:43	Česká republika, Latvija	Žena	Kvalifikace Chůva pro děti v dětské skupině, Vyšší odborné vzdělání (úroveň 2)	6 - 10 let	Ve městě, Ve venkovské oblasti	Neinkluzivní (instituce nerealizuje speciální vzdělávací programy)	1 - 3 roky, 3 - 5 let, Smíšené věkové skupiny	6 - 10 dětí	1 - 2	Žádné	Poměrně důležité	Velmi důležité	Poměrně důležité	Chůva	Vždy	Vždy	Vždy	Někdy	Nikdy	Často	Někdy	Nikdy	Často	Nikdy	Často, Vždy	Nikdy	Někdy	Nikdy	Někdy	Nikdy	Někdy	Často	Nikdy	Nikdy	Nikdy	Někdy	Často	Nikdy	Často	Někdy	Nikdy	Často	Často	Často	Nikdy	Nikdy	Někdy	Někdy	Nikdy
5/30/2025 18:23:44	Česká republika	Žena	Středoškolské vzdělání (úroveň 1)	6 - 10 let	Ve městě	Inkluzivní (instituce realizuje speciální vzdělávací programy)	1 - 3 roky	11 - 15 dětí	1 - 2	1 - 2 děti	Spíše není důležité	Spíše není důležité	Spíše není důležité	Učitel	Často	Často	Často	Často	Často	Často	Často	Často	Často	Často	Často	Často	Často	Často	Často	Často	Často	Často	Často	Často	Často	Často	Často	Často	Často	Často	Často	Často	Často	Často	Často	Často	Často	Často	Často
5/30/2025 18:37:23	Česká republika	Žena	Středoškolské vzdělání (úroveň 1)	3 - 5 let	V malém městě (městys)	Neinkluzivní (instituce nerealizuje speciální vzdělávací programy)	1 - 3 roky	16 - 20 dětí	2 - 4	Žádné	Poměrně důležité	Poměrně důležité	Spíše není důležité	Učitel	Někdy	Často	Často	Vždy	Někdy	Často	Často	Někdy	Vždy	Někdy	Často	Nikdy	Někdy	Často	Vždy	Někdy	Často	Někdy	Nikdy	Nikdy	Nikdy	Někdy	Často	Někdy	Někdy	Někdy	Nikdy	Někdy	Často	Často	Často	Někdy	Často	Často	Vždy
5/31/2025 16:08:59	Česká republika	Žena	Středoškolské vzdělání (úroveň 1)	6 - 10 let	Ve městě, V malém městě (městys)	Inkluzivní (instituce realizuje speciální vzdělávací programy)	1 - 3 roky, 3 - 5 let, 6 - 8 let	11 - 15 dětí	2 - 4	1 - 2 děti	Poměrně důležité	Poměrně důležité	Poměrně důležité	Chůva	Často	Často	Často	Někdy	Často	Často	Často	Často	Často	Nikdy	Nikdy	Nikdy	Někdy	Nikdy	Někdy	Často	Někdy	Někdy	Někdy	Někdy	Nikdy	Vždy	Vždy	Vždy	Vždy	Často	Často	Někdy	Někdy	Někdy	Někdy	Někdy	Často	Někdy	Někdy
6/1/2025 7:13:30	Česká republika	Žena	Bakalářský titul	1 - 2 roky	Ve městě	Inkluzivní (instituce realizuje speciální vzdělávací programy)	3 - 5 let	26 a více dětí	1 - 2	1 - 2 děti	Velmi důležité	Velmi důležité	Velmi důležité	Učitel před nástupem do zaměstnání	Vždy	Vždy	Vždy	Vždy	Vždy	Často	Vždy	Často	Vždy	Vždy	Vždy	Vždy	Vždy	Někdy	Někdy	Často	Nikdy	Někdy	Nikdy	Nikdy	Nikdy	Vždy	Často	Často	Často	Často	Často	Někdy	Často	Často	Často	Někdy	Někdy	Někdy	Vždy
6/2/2025 10:02:00	Česká republika	Žena	Vyšší odborné vzdělání (úroveň 2)	Více než 10 let	Ve městě	Inkluzivní (instituce realizuje speciální vzdělávací programy)	1 - 3 roky	11 - 15 dětí	2 - 4	3 - 5 děti	Velmi důležité	Velmi důležité	Poměrně důležité	Chůva	Někdy	Často	Často	Někdy	Vždy	Často	Vždy	Často	Často	Vždy	Často	Často	Někdy	Někdy	Často	Někdy	Někdy	Často	Často	Vždy	Někdy	Někdy	Často	Často	Vždy	Vždy	Často		Vždy	Vždy	Vždy	Často	Vždy	Často	Někdy
6/3/2025 8:31:11	Česká republika	Žena	Bakalářský titul	Více než 10 let	Ve městě	Inkluzivní (instituce realizuje speciální vzdělávací programy)	3 - 5 let, Smíšené věkové skupiny	11 - 15 dětí	1 - 2	1 - 2 děti	Velmi důležité	Velmi důležité	Neutrální, bez názoru	Učitel	Někdy	Často	Často	Někdy	Někdy	Vždy	Často	Často	Často	Často	Často	Někdy	Často	Často	Často	Často	Často	Vždy	Často	Často	Často	Často	Někdy	Často	Často	Často	Někdy, Často	Někdy	Často	Často	Vždy	Nikdy	Někdy	Někdy	Někdy
6/19/2025 19:45:04	Česká republika	Žena	Bakalářský titul	Více než 10 let	Ve venkovské oblasti	Inkluzivní (instituce realizuje speciální vzdělávací programy)	Smíšené věkové skupiny	21 - 25 dětí	1 - 2	3 - 5 děti	Velmi důležité	Neutrální, bez názoru	Neutrální, bez názoru	Učitel	Často	Vždy	Někdy	Často	Někdy	Často	Často	Často	Často	Často	Někdy	Často	Někdy, Často	Někdy	Vždy	Někdy	Často	Často	Někdy	Nikdy	Někdy	Často	Často	Často	Někdy	Často	Vždy	Často	Často	Často	Někdy	Nikdy	Někdy	Vždy	Často
6/19/2025 19:51:28	Česká republika	Žena	V současné době pokračuji v získávání kvalifikace předškolní pedagog, Bakalářský titul	Méně než jeden rok	Ve městě	Inkluzivní (instituce realizuje speciální vzdělávací programy)	3 - 5 let	21 - 25 dětí	2 - 4	1 - 2 děti	Velmi důležité	Velmi důležité	Velmi důležité	Student
6/19/2025 21:28:10	Česká republika	Žena	Bakalářský titul	3 - 5 let	V malém městě (městys)	Inkluzivní (instituce realizuje speciální vzdělávací programy)	3 - 5 let	16 - 20 dětí	2 - 4	Žádné	Spíše není důležité, Neutrální, bez názoru	Neutrální, bez názoru	Neutrální, bez názoru	Učitel	Někdy	Často	Někdy	Často	Někdy	Někdy	Někdy	Někdy	Často	Často	Často	Často	Někdy	Někdy	Někdy	Někdy	Nikdy	Někdy	Nikdy	Nikdy	Nikdy	Někdy	Někdy	Někdy	Někdy	Někdy	Někdy	Někdy	Někdy	Někdy	Někdy	Někdy	Někdy	Někdy	Někdy
6/20/2025 7:31:27	Česká republika	Žena	Bakalářský titul	1 - 2 roky	Ve venkovské oblasti	Neinkluzivní (instituce nerealizuje speciální vzdělávací programy)	3 - 5 let	21 - 25 dětí	1 - 2	1 - 2 děti	Poměrně důležité	Poměrně důležité		Student
6/20/2025 9:37:57	Česká republika	Žena	V současné době pokračuji v získávání kvalifikace předškolní pedagog, Středoškolské vzdělání (úroveň 1)	Méně než jeden rok	Ve městě	Inkluzivní (instituce realizuje speciální vzdělávací programy)	3 - 5 let	21 - 25 dětí	2 - 4	1 - 2 děti	Velmi důležité	Velmi důležité	Velmi důležité	Student
7/7/2025 12:08:19	Česká republika	Žena	Bakalářský titul	Více než 10 let	Ve městě	Inkluzivní (instituce realizuje speciální vzdělávací programy)	Smíšené věkové skupiny	21 - 25 dětí	2 - 4		Velmi důležité	Poměrně důležité	Velmi důležité	Učitel	Vždy	Vždy	Vždy	Vždy	Často	Často	Často	Často	Často	Často	Často	Často	Vždy	Vždy	Často	Často	Často	Často	Někdy	Někdy	Vždy	Často	Vždy	Často	Vždy	Vždy	Často	Často	Vždy	Vždy	Vždy	Vždy	Často	Vždy	Vždy
7/7/2025 20:39:13	Česká republika	Žena	Magisterský titul	6 - 10 let	Ve městě	Inkluzivní (instituce realizuje speciální vzdělávací programy)	Smíšené věkové skupiny	16 - 20 dětí	1 - 2	Více než 5 dětí	Velmi důležité	Velmi důležité	Velmi důležité	Učitel	Často	Vždy	Vždy	Někdy	Často	Vždy	Často	Často	Vždy	Někdy	Často	Někdy	Často	Nikdy	Vždy	Často	Často	Vždy	Často	Často	Vždy	Často	Vždy	Vždy	Vždy	Někdy	Někdy	Často	Často	Někdy	Často	Často	Vždy	Často	Někdy
7/10/2025 13:17:15	Česká republika	Žena	Magisterský titul	1 - 2 roky	Ve městě, Ve venkovské oblasti	Neinkluzivní (instituce nerealizuje speciální vzdělávací programy)	3 - 5 let	11 - 15 dětí	1 - 2	Žádné	Velmi důležité	Velmi důležité	Velmi důležité	Chůva	Vždy	Často	Často	Někdy	Někdy	Často	Často	Někdy	Někdy	Někdy	Někdy	Nikdy	Nikdy	Nikdy	Někdy	Někdy	Nikdy	Někdy	Často	Někdy	Nikdy	Někdy	Často	Někdy	Často	Někdy	Někdy	Někdy	Často	Někdy	Nikdy	Někdy	Někdy	Nikdy	Nikdy
7/12/2025 13:30:20	Česká republika	Žena	Magisterský titul	6 - 10 let	Ve městě	Inkluzivní (instituce realizuje speciální vzdělávací programy)	3 - 5 let, 6 - 8 let	11 - 15 dětí	2 - 4	1 - 2 děti	Velmi důležité	Velmi důležité	Velmi důležité	Učitel	Často	Často	Často	Často	Někdy	Někdy	Často	Často	Často	Často	Často	Někdy	Často	Často	Často	Často	Někdy	Někdy	Někdy	Často	Často	Často	Často	Někdy	Někdy	Často	Často	Někdy	Často	Často	Někdy	Často	Často	Často	Někdy
7/15/2025 16:59:42	Česká republika	Žena	Magisterský titul	6 - 10 let	Ve městě	Inkluzivní (instituce realizuje speciální vzdělávací programy)	Smíšené věkové skupiny	21 - 25 dětí	1 - 2	3 - 5 děti	Velmi důležité	Velmi důležité	Velmi důležité	Učitel	Často	Vždy	Vždy	Často	Často	Vždy	Často	Vždy	Vždy	Často	Často	Někdy	Někdy	Často	Vždy	Často	Často	Často	Často	Často	Často	Vždy	Často	Často	Často	Někdy	Někdy	Někdy	Často	Často	Někdy	Někdy	Často	Často	Často
7/15/2025 17:09:27	Česká republika	Žena	Středoškolské vzdělání (úroveň 1)	Více než 10 let	Ve městě	Inkluzivní (instituce realizuje speciální vzdělávací programy)	3 - 5 let	21 - 25 dětí	1 - 2	3 - 5 děti	Velmi důležité	Velmi důležité	Velmi důležité	Učitel	Často	Často	Vždy	Někdy	Často	Vždy	Často	Často	Často	Často	Vždy	Nikdy	Vždy	Často	Často	Někdy	Nikdy	Často	Často	Často	Vždy	Někdy	Často	Někdy, Často	Často	Často	Často	Často	Často	Často	Někdy	Často, Vždy	Vždy	Vždy	Často
7/15/2025 19:47:29	Česká republika	Žena	Středoškolské vzdělání (úroveň 1)	Více než 10 let	Ve městě	Inkluzivní (instituce realizuje speciální vzdělávací programy)	3 - 5 let	21 - 25 dětí	1 - 2	1 - 2 děti	Poměrně důležité	Velmi důležité	Velmi důležité	Učitel	Často	Často	Vždy	Někdy	Často	Často	Často	Často	Vždy	Často	Často	Někdy	Často	Nikdy	Někdy	Nikdy	Někdy	Často	Někdy	Často	Někdy	Někdy	Často	Často	Někdy	Někdy	Někdy	Někdy	Často	Často	Nikdy	Často	Nikdy	Nikdy	Někdy
7/15/2025 20:32:36	Česká republika	Žena	Doktorský titul	3 - 5 let	Ve městě	Inkluzivní (instituce realizuje speciální vzdělávací programy)	3 - 5 let, Smíšené věkové skupiny	11 - 15 dětí	2 - 4	1 - 2 děti	Poměrně důležité	Velmi důležité	Poměrně důležité	Učitel	Často	Někdy	Často	Často	Někdy	Vždy	Často	Vždy	Často	Často	Často	Vždy	Často	Nikdy	Často	Vždy	Někdy	Vždy	Někdy	Často	Vždy	Vždy	Často	Často	Vždy	Někdy	Vždy	Často	Vždy	Vždy	Někdy	Někdy	Často	Často	Někdy
7/15/2025 21:36:21	Česká republika	Žena	Bakalářský titul	Méně než jeden rok	Ve městě	Inkluzivní (instituce realizuje speciální vzdělávací programy)	3 - 5 let, 6 - 8 let	11 - 15 dětí	1 - 2, 2 - 4	Jiný	Velmi důležité	Velmi důležité	Poměrně důležité	Chůva	Často	Často	Často	Často	Někdy	Někdy	Někdy	Často	Někdy	Někdy	Někdy	Vždy	Často	Vždy	Často	Vždy	Často	Často	Někdy	Někdy	Někdy	Někdy	Vždy	Často	Často	Někdy	Někdy	Někdy	Často	Často	Někdy, Často	Někdy	Často	Často	Někdy
7/15/2025 23:09:57	Česká republika	Žena	Středoškolské vzdělání (úroveň 1)	Více než 10 let	Ve městě	Inkluzivní (instituce realizuje speciální vzdělávací programy)	Smíšené věkové skupiny	16 - 20 dětí	1 - 2	1 - 2 děti	Velmi důležité	Velmi důležité	Velmi důležité	Učitel	Často	Vždy	Často	Často	Často	Často	Často	Často	Často	Často	Často	Často	Často	Často	Často	Někdy	Často	Často	Někdy	Často	Často	Často	Často	Často	Často	Často	Často	Často	Často	Často	Často	Někdy	Často	Někdy	Často
7/16/2025 7:05:31	Česká republika	Žena	Magisterský titul	6 - 10 let	Ve městě	Inkluzivní (instituce realizuje speciální vzdělávací programy)	3 - 5 let, 6 - 8 let	21 - 25 dětí	1 - 2	Žádné	Poměrně důležité	Poměrně důležité	Poměrně důležité	Učitel	Často	Často	Často	Často	Někdy	Často	Často	Někdy	Často	Někdy	Někdy	Někdy	Často	Nikdy	Někdy	Někdy	Nikdy	Někdy	Nikdy	Nikdy	Někdy	Někdy	Někdy	Někdy	Někdy	Někdy	Nikdy	Často	Vždy	Často	Nikdy	Někdy	Často	Někdy	Někdy
7/16/2025 18:56:45	Česká republika	Žena	Magisterský titul	Více než 10 let	Ve městě	Inkluzivní (instituce realizuje speciální vzdělávací programy)	3 - 5 let, 6 - 8 let	21 - 25 dětí	1 - 2	1 - 2 děti	Velmi důležité	Velmi důležité	Velmi důležité	Učitel	Často	Často	Často	Někdy	Často	Často	Vždy	Často	Často	Vždy	Vždy	Často	Často	Často	Vždy	Často	Často	Často	Někdy	Někdy	Často	Vždy	Vždy	Často	Často	Často	Někdy	Často	Vždy	Vždy	Často	Někdy	Někdy	Často	Často
7/17/2025 15:02:59	Další	Žena	Středoškolské vzdělání (úroveň 1)	Více než 10 let	Ve městě	Inkluzivní (instituce realizuje speciální vzdělávací programy)	Jiný	21 - 25 dětí	2 - 4	3 - 5 děti	Není důležité	Není důležité	Spíše není důležité	Učitel	Někdy	Často	Často	Často	Vždy	Někdy	Vždy	Často	Vždy	Vždy	Někdy	Vždy	Často	Někdy	Často	Vždy	Někdy		Někdy	Někdy	Vždy	Často	Často	Často	Vždy	Někdy	Často	Často	Vždy	Vždy	Někdy	Vždy	Vždy	Často	Vždy
7/22/2025 1:43:23	Česká republika	Žena	Vyšší odborné vzdělání (úroveň 2)	Více než 10 let	Ve městě	Inkluzivní (instituce realizuje speciální vzdělávací programy)	Smíšené věkové skupiny	16 - 20 dětí	1 - 2	1 - 2 děti	Velmi důležité	Poměrně důležité	Velmi důležité	Učitel	Vždy	Vždy	Vždy	Vždy	Vždy	Vždy	Vždy	Vždy	Vždy	Vždy	Vždy	Vždy	Vždy	Často	Často	Často	Často	Často	Často	Často	Často	Vždy	Vždy	Často	Často	Vždy	Často	Často	Často	Vždy	Často	Vždy	Vždy	Často	Vždy
8/26/2025 13:38:50	Česká republika	Žena	Kvalifikace Chůva pro děti v dětské skupině	1 - 2 roky	Ve městě	Inkluzivní (instituce realizuje speciální vzdělávací programy)	1 - 3 roky, 3 - 5 let	26 a více dětí	2 - 4	1 - 2 děti				Chůva	Někdy	Často	Někdy	Nikdy	Někdy	Často	Někdy	Někdy	Často	Někdy	Někdy	Nikdy	Nikdy, Někdy	Nikdy	Nikdy	Někdy	Někdy	Nikdy	Nikdy	Nikdy	Nikdy	Někdy	Vždy	Často		Nikdy	Nikdy	Nikdy	Často	Nikdy	Někdy	Nikdy	Nikdy	Nikdy	Nikdy
8/27/2025 21:02:20	Česká republika	Žena	Kvalifikace Chůva pro děti v dětské skupině, Středoškolské vzdělání (úroveň 1)	6 - 10 let	Ve městě	Inkluzivní (instituce realizuje speciální vzdělávací programy)	1 - 3 roky, 3 - 5 let	21 - 25 dětí	5 nebo více	3 - 5 děti	Poměrně důležité	Poměrně důležité	Poměrně důležité	Chůva	Vždy	Vždy	Často	Vždy	Často	Vždy	Vždy	Někdy	Někdy, Často	Někdy	Někdy	Někdy	Často	Nikdy	Někdy	Často	Nikdy	Někdy	Nikdy	Nikdy	Někdy	Někdy	Často	Vždy	Vždy	Často	Často	Vždy	Vždy	Často	Někdy	Někdy	Vždy	Někdy	Nikdy
8/29/2025 8:36:38	Česká republika	Žena	Magisterský titul	Více než 10 let	Ve městě	Neinkluzivní (instituce nerealizuje speciální vzdělávací programy)	Smíšené věkové skupiny	11 - 15 dětí	2 - 4	Žádné	Poměrně důležité	Velmi důležité	Velmi důležité	Chůva	Často	Někdy	Někdy	Vždy	Často	Vždy	Někdy	Často	Často	Často	Často	Často	Často	Někdy	Někdy	Často	Někdy	Často	Často	Často	Někdy	Často	Často	Často	Často	Často	Často	Často, Vždy	Často	Často	Často	Často	Často	Často	Často
8/29/2025 9:14:53	Česká republika	Žena	Magisterský titul	3 - 5 let	Ve městě, V malém městě (městys)	Inkluzivní (instituce realizuje speciální vzdělávací programy)	3 - 5 let	21 - 25 dětí	1 - 2	1 - 2 děti	Poměrně důležité	Velmi důležité	Velmi důležité	Učitel	Někdy	Vždy	Vždy	Vždy	Vždy	Často	Vždy	Často	Často	Často	Někdy	Často	Často	Někdy	Často	Často	Někdy	Někdy	Někdy	Někdy	Někdy	Někdy	Často	Někdy	Někdy	Někdy	Někdy	Někdy	Někdy	Někdy	Někdy	Někdy	Někdy	Někdy	Někdy
8/29/2025 9:31:04	Česká republika	Žena	Magisterský titul	Méně než jeden rok	Ve městě	Inkluzivní (instituce realizuje speciální vzdělávací programy)	3 - 5 let	16 - 20 dětí	2 - 4	1 - 2 děti	Poměrně důležité, Velmi důležité	Velmi důležité	Velmi důležité	Učitel	Vždy	Často	Vždy	Někdy	Někdy	Někdy	Často	Často	Často	Často	Často	Někdy	Často	Nikdy	Vždy	Vždy	Nikdy	Vždy	Nikdy	Nikdy	Vždy	Často	Vždy	Často	Vždy	Vždy	Nikdy	Vždy	Často	Často	Nikdy	Vždy	Vždy	Vždy	Vždy
8/29/2025 9:53:57	Česká republika	Žena	Středoškolské vzdělání (úroveň 1)	1 - 2 roky	Ve městě	Inkluzivní (instituce realizuje speciální vzdělávací programy)	3 - 5 let, 6 - 8 let	21 - 25 dětí	1 - 2	Žádné	Velmi důležité	Poměrně důležité	Poměrně důležité	Učitel	Někdy	Vždy	Často	Někdy	Někdy	Často	Často	Někdy	Často	Někdy	Někdy	Nikdy	Často	Nikdy	Často	Někdy	Nikdy	Nikdy	Někdy	Nikdy	Často	Často	Často	Často	Vždy	Vždy	Nikdy	Někdy	Často	Často	Někdy	Nikdy	Vždy	Někdy	Nikdy
8/29/2025 13:38:04	Česká republika	Žena	Bakalářský titul	1 - 2 roky	Ve městě	Inkluzivní (instituce realizuje speciální vzdělávací programy)	Smíšené věkové skupiny	21 - 25 dětí	1 - 2	1 - 2 děti	Velmi důležité	Poměrně důležité	Poměrně důležité	Student
8/30/2025 19:30:01	Česká republika	Muž	Středoškolské vzdělání (úroveň 1)	Více než 10 let	V malém městě (městys)	Jiný	3 - 5 let	21 - 25 dětí	1 - 2	1 - 2 děti	Velmi důležité	Poměrně důležité	Poměrně důležité	Učitel	Často	Často	Často	Někdy	Často	Vždy	Často	Často	Často	Někdy	Někdy	Někdy	Často	Někdy	Někdy	Nikdy	Nikdy	Někdy	Nikdy	Nikdy	Někdy	Často	Často	Často	Často	Někdy	Někdy	Často	Často	Často	Někdy	Často	Často	Někdy	Někdy
9/2/2025 16:42:57	Česká republika	Žena	Bakalářský titul	Méně než jeden rok	Ve městě, Jiný	Neinkluzivní (instituce nerealizuje speciální vzdělávací programy)	1 - 3 roky, 3 - 5 let	6 - 10 dětí	1 - 2	Žádné	Poměrně důležité	Velmi důležité	Poměrně důležité	Student
9/2/2025 21:30:45	Česká republika	Žena	V současné době pokračuji v získávání kvalifikace předškolní pedagog, Bakalářský titul	Méně než jeden rok	V malém městě (městys)	Inkluzivní (instituce realizuje speciální vzdělávací programy)	3 - 5 let	16 - 20 dětí	1 - 2	Žádné	Velmi důležité	Velmi důležité	Poměrně důležité	Učitel	Někdy	Někdy	Často	Nikdy	Často	Často	Často	Často	Někdy	Někdy	Někdy	Někdy	Často	Někdy	Často	Někdy	Nikdy	Často	Nikdy	Nikdy	Někdy	Často	Často	Někdy	Často	Často	Nikdy	Často	Často	Někdy	Nikdy	Někdy	Často	Někdy	Někdy
9/4/2025 8:59:40	Česká republika	Žena	Bakalářský titul	Méně než jeden rok	Ve městě	Inkluzivní (instituce realizuje speciální vzdělávací programy)	1 - 3 roky	16 - 20 dětí	2 - 4	1 - 2 děti	Velmi důležité	Velmi důležité	Poměrně důležité	Student
9/4/2025 14:04:37	Česká republika	Žena	Bakalářský titul	Méně než jeden rok	Ve městě	Neinkluzivní (instituce nerealizuje speciální vzdělávací programy)	1 - 3 roky	11 - 15 dětí	1 - 2	Žádné	Velmi důležité	Poměrně důležité	Velmi důležité	Student
9/9/2025 11:04:22	Česká republika	Žena	Bakalářský titul	1 - 2 roky	Ve městě	Inkluzivní (instituce realizuje speciální vzdělávací programy)	3 - 5 let	21 - 25 dětí	1 - 2	Žádné	Velmi důležité	Neutrální, bez názoru	Poměrně důležité	Učitel	Často	Vždy	Vždy	Vždy	Vždy	Někdy	Často	Často	Vždy	Často	Vždy	Někdy	Často	Někdy	Často	Často	Často	Často	Často	Často	Často	Často	Často	Vždy	Často	Někdy	Často	Často	Často	Často	Často	Vždy	Vždy	Často	Často
9/9/2025 11:42:13	Česká republika	Žena	Bakalářský titul	Méně než jeden rok	Ve městě, V malém městě (městys), Ve venkovské oblasti	Inkluzivní (instituce realizuje speciální vzdělávací programy), Neinkluzivní (instituce nerealizuje speciální vzdělávací programy)	3 - 5 let, Smíšené věkové skupiny	16 - 20 dětí, 21 - 25 dětí	1 - 2, 2 - 4	1 - 2 děti	Velmi důležité	Velmi důležité	Velmi důležité	Student
9/9/2025 16:18:53	Česká republika	Žena	Bakalářský titul	3 - 5 let	V malém městě (městys)	Inkluzivní (instituce realizuje speciální vzdělávací programy)	3 - 5 let	16 - 20 dětí	1 - 2	1 - 2 děti	Poměrně důležité	Neutrální, bez názoru	Neutrální, bez názoru	Učitel	Někdy	Často	Často	Někdy	Někdy	Někdy	Často	Často	Někdy	Někdy	Někdy	Někdy	Někdy	Nikdy	Někdy	Někdy	Někdy	Někdy	Někdy	Někdy	Někdy	Někdy	Často	Často	Často	Někdy	Někdy	Někdy	Často	Někdy	Někdy	Někdy	Někdy	Někdy	Někdy
9/9/2025 17:49:52	Česká republika	Žena	Bakalářský titul	1 - 2 roky	Ve venkovské oblasti	Inkluzivní (instituce realizuje speciální vzdělávací programy)	1 - 3 roky	16 - 20 dětí	1 - 2	Žádné	Velmi důležité	Velmi důležité	Velmi důležité	Učitel	Často	Často	Často	Často	Někdy	Někdy	Vždy	Často	Vždy	Někdy	Někdy	Nikdy	Někdy	Nikdy	Vždy	Někdy	Nikdy	Někdy	Někdy	Někdy	Někdy	Často	Často	Často	Často	Někdy	Nikdy	Někdy	Vždy	Často	Nikdy	Někdy	Často	Často	Někdy
9/10/2025 21:26:56	Česká republika	Žena	V současné době pokračuji v získávání kvalifikace předškolní pedagog, Kvalifikace Chůva pro děti v dětské skupině, Bakalářský titul	Více než 10 let	Ve městě	Jiný	Smíšené věkové skupiny	11 - 15 dětí	1 - 2	Žádné	Velmi důležité	Spíše není důležité	Poměrně důležité	Chůva	Vždy	Vždy	Vždy	Někdy	Někdy	Vždy	Vždy	Často	Vždy	Někdy	Vždy	Někdy	Někdy	Nikdy	Někdy	Vždy	Nikdy	Vždy	Někdy	Často, Vždy	Často	Vždy	Často	Někdy	Někdy	Často	Někdy	Někdy	Často	Vždy	Někdy	Někdy	Někdy	Někdy	Někdy
9/13/2025 23:05:24	Česká republika	Žena	Středoškolské vzdělání (úroveň 1)	1 - 2 roky	Ve městě	Inkluzivní (instituce realizuje speciální vzdělávací programy)	1 - 3 roky, 3 - 5 let, 6 - 8 let	6 - 10 dětí	1 - 2	1 - 2 děti	Velmi důležité	Velmi důležité	Velmi důležité	Učitel	Vždy	Často	Vždy	Vždy	Vždy	Někdy	Někdy	Často	Vždy	Vždy	Vždy	Někdy	Vždy	Nikdy	Někdy	Často						Vždy	Někdy	Někdy	Vždy	Někdy	Často	Někdy	Často		Někdy		Vždy		Vždy
9/26/2025 16:58:29	Česká republika	Žena	Vyšší odborné vzdělání (úroveň 2)	3 - 5 let	Ve městě	Inkluzivní (instituce realizuje speciální vzdělávací programy)	3 - 5 let, 6 - 8 let	16 - 20 dětí	2 - 4	1 - 2 děti	Poměrně důležité	Poměrně důležité	Neutrální, bez názoru	Chůva	Někdy	Někdy	Někdy	Někdy	Někdy	Někdy	Často	Často	Často	Často	Často	Často	Často	Někdy	Někdy	Někdy	Nikdy	Někdy	Někdy	Někdy	Nikdy	Nikdy	Někdy	Někdy	Často	Někdy	Někdy	Často	Často	Někdy	Někdy	Někdy	Často	Často	Někdy
9/26/2025 21:56:53	Česká republika	Žena	Kvalifikace Chůva pro děti v dětské skupině, Středoškolské vzdělání (úroveň 1)	1 - 2 roky	Ve městě	Inkluzivní (instituce realizuje speciální vzdělávací programy)	1 - 3 roky, 3 - 5 let	16 - 20 dětí	2 - 4	1 - 2 děti	Velmi důležité	Poměrně důležité	Poměrně důležité	Chůva	Někdy	Často	Často	Nikdy	Často	Někdy	Někdy	Často	Často		Někdy	Často	Často	Někdy	Vždy	Vždy	Někdy	Vždy	Často	Nikdy	Často	Vždy	Často	Vždy	Vždy	Často	Nikdy	Často	Často	Často	Někdy, Vždy	Někdy	Vždy	Často	Někdy
9/27/2025 14:41:35	Česká republika	Žena	Bakalářský titul	3 - 5 let	Ve městě	Inkluzivní (instituce realizuje speciální vzdělávací programy)	1 - 3 roky	6 - 10 dětí	1 - 2	Žádné	Velmi důležité	Poměrně důležité	Velmi důležité	Student
9/28/2025 15:05:21	Česká republika	Žena	V současné době pokračuji v získávání kvalifikace předškolní pedagog, Středoškolské vzdělání (úroveň 1)	Bez zkušeností	Jiný						Velmi důležité	Velmi důležité	Velmi důležité	Student
9/28/2025 15:12:23	Česká republika	Žena	Bakalářský titul	Více než 10 let	V malém městě (městys)	Inkluzivní (instituce realizuje speciální vzdělávací programy)	6 - 8 let	21 - 25 dětí	1 - 2	3 - 5 děti	Velmi důležité	Velmi důležité	Poměrně důležité	Učitel před nástupem do zaměstnání	Často	Často	Vždy	Často	Někdy	Často	Často	Často	Vždy	Někdy	Často	Někdy	Někdy	Někdy	Někdy	Často	Někdy	Někdy	Nikdy	Někdy	Často	Někdy	Někdy	Někdy	Často	Vždy	Někdy	Často	Někdy	Vždy	Nikdy	Často	Vždy	Někdy	Často
9/28/2025 15:21:33	Česká republika	Žena	V současné době pokračuji v získávání kvalifikace předškolní pedagog, Středoškolské vzdělání (úroveň 1)	Bez zkušeností	Ve městě	Inkluzivní (instituce realizuje speciální vzdělávací programy)	Smíšené věkové skupiny	16 - 20 dětí	2 - 4	1 - 2 děti	Velmi důležité	Poměrně důležité	Poměrně důležité	Student
9/28/2025 15:28:53	Česká republika	Žena	Bakalářský titul	Více než 10 let	Ve městě, Ve venkovské oblasti	Inkluzivní (instituce realizuje speciální vzdělávací programy)	Smíšené věkové skupiny	21 - 25 dětí	2 - 4	1 - 2 děti	Poměrně důležité, Velmi důležité	Spíše není důležité	Spíše není důležité	Učitel	Často	Vždy	Často	Někdy	Často	Často	Často	Vždy	Vždy	Někdy	Často	Nikdy, Někdy	Často	Někdy	Často	Někdy, Často	Nikdy	Často	Často	Někdy	Někdy	Často	Často	Často	Vždy	Často	Někdy	Vždy	Vždy	Vždy	Vždy	Často	Vždy	Někdy	Často
9/28/2025 15:38:51	Česká republika	Žena	V současné době pokračuji v získávání kvalifikace předškolní pedagog, Bakalářský titul	Méně než jeden rok	Ve venkovské oblasti	Inkluzivní (instituce realizuje speciální vzdělávací programy)	3 - 5 let	11 - 15 dětí	2 - 4	1 - 2 děti	Velmi důležité	Velmi důležité	Velmi důležité	Učitel	Někdy	Často	Vždy	Vždy	Často	Vždy	Často, Vždy	Vždy	Vždy	Často	Vždy	Nikdy	Někdy	Vždy	Vždy	Často	Nikdy	Často	Nikdy	Nikdy	Někdy, Často	Často	Vždy	Vždy	Vždy	Často	Někdy	Často	Vždy	Často, Vždy	Někdy	Někdy	Vždy	Vždy	Někdy
9/28/2025 16:10:48	Česká republika	Žena	Bakalářský titul	1 - 2 roky	Ve městě, Ve venkovské oblasti	Inkluzivní (instituce realizuje speciální vzdělávací programy)	Smíšené věkové skupiny	21 - 25 dětí, Jiný	2 - 4	1 - 2 děti	Velmi důležité	Poměrně důležité	Velmi důležité	Student
9/28/2025 17:05:07	Česká republika	Žena	V současné době pokračuji v získávání kvalifikace předškolní pedagog, Středoškolské vzdělání (úroveň 1)	Bez zkušeností	Ve venkovské oblasti	Neinkluzivní (instituce nerealizuje speciální vzdělávací programy)	Smíšené věkové skupiny	26 a více dětí	2 - 4	1 - 2 děti	Velmi důležité	Velmi důležité	Velmi důležité	Student
9/28/2025 17:14:59	Česká republika	Žena	V současné době pokračuji v získávání kvalifikace předškolní pedagog, Bakalářský titul	Méně než jeden rok	Ve městě	Neinkluzivní (instituce nerealizuje speciální vzdělávací programy)	Smíšené věkové skupiny	21 - 25 dětí	1 - 2	Žádné	Velmi důležité	Poměrně důležité	Poměrně důležité	Učitel	Někdy	Často	Často	Nikdy	Často	Často	Často	Někdy	Vždy	Často	Vždy	Často	Často	Nikdy	Často	Nikdy	Nikdy	Někdy	Nikdy	Nikdy	Často	Někdy	Často	Někdy	Někdy	Nikdy	Nikdy	Nikdy	Někdy	Někdy	Nikdy	Někdy	Často	Často	Někdy
9/28/2025 19:21:19	Česká republika	Žena	V současné době pokračuji v získávání kvalifikace předškolní pedagog, Bakalářský titul	6 - 10 let	Ve venkovské oblasti	Jiný	Jiný	26 a více dětí	1 - 2	3 - 5 děti	Velmi důležité	Velmi důležité	Velmi důležité	Učitel	Často	Vždy	Často	Někdy	Vždy	Vždy	Vždy	Někdy	Často	Často	Často, Vždy	Často	Často	Někdy	Často	Často	Někdy	Často	Nikdy	Nikdy	Často	Vždy	Často	Někdy	Vždy	Někdy	Často	Často	Často	Někdy	Někdy	Často	Často	Často	Často
9/28/2025 20:30:56	Česká republika	Žena	V současné době pokračuji v získávání kvalifikace předškolní pedagog, Středoškolské vzdělání (úroveň 1)	1 - 2 roky	Ve městě	Inkluzivní (instituce realizuje speciální vzdělávací programy)	3 - 5 let	16 - 20 dětí	1 - 2	1 - 2 děti	Velmi důležité	Poměrně důležité	Poměrně důležité	Student
9/28/2025 21:35:02	Česká republika	Žena	Bakalářský titul	6 - 10 let	V malém městě (městys)	Inkluzivní (instituce realizuje speciální vzdělávací programy)	Smíšené věkové skupiny	21 - 25 dětí	2 - 4	1 - 2 děti	Velmi důležité	Velmi důležité	Velmi důležité	Učitel	Často	Vždy	Vždy	Často	Často	Často	Často	Často	Vždy	Často	Často	Často	Často	Často	Často	Často	Často	Často	Často	Často	Často	Často	Často	Často	Často	Vždy	Často	Vždy	Vždy	Vždy	Vždy	Často	Často	Často	Často
9/28/2025 22:29:54	Česká republika	Žena	Středoškolské vzdělání (úroveň 1)	Bez zkušeností	Jiný									Student
9/29/2025 0:58:37	Česká republika	Žena	V současné době pokračuji v získávání kvalifikace předškolní pedagog, Středoškolské vzdělání (úroveň 1)	1 - 2 roky	Ve městě, Ve venkovské oblasti	Inkluzivní (instituce realizuje speciální vzdělávací programy)	3 - 5 let	21 - 25 dětí	1 - 2	1 - 2 děti	Velmi důležité	Velmi důležité	Velmi důležité	Student
9/29/2025 9:38:37	Česká republika	Žena	V současné době pokračuji v získávání kvalifikace předškolní pedagog	Méně než jeden rok	Ve venkovské oblasti	Inkluzivní (instituce realizuje speciální vzdělávací programy)	3 - 5 let	21 - 25 dětí	2 - 4	1 - 2 děti	Velmi důležité	Velmi důležité	Velmi důležité	Student
9/29/2025 10:33:56	Česká republika	Žena	Magisterský titul	6 - 10 let	Ve městě	Inkluzivní (instituce realizuje speciální vzdělávací programy)	1 - 3 roky, 3 - 5 let	21 - 25 dětí	2 - 4	1 - 2 děti	Poměrně důležité	Poměrně důležité	Poměrně důležité	Učitel	Často	Často	Často	Často	Někdy	Často	Často	Někdy	Často	Často	Často	Často	Často	Někdy	Často	Často	Často	Často	Často	Často	Často	Často	Často	Často	Často	Někdy	Někdy, Často	Často	Často	Často	Často	Někdy	Často	Často	Často
9/29/2025 10:39:17	Česká republika	Muž	Bakalářský titul	3 - 5 let	Ve městě	Inkluzivní (instituce realizuje speciální vzdělávací programy)	3 - 5 let, Smíšené věkové skupiny	16 - 20 dětí	2 - 4	1 - 2 děti	Poměrně důležité	Poměrně důležité	Neutrální, bez názoru	Student
9/29/2025 11:28:18	Česká republika	Žena	V současné době pokračuji v získávání kvalifikace předškolní pedagog	3 - 5 let, 6 - 10 let	Ve městě	Neinkluzivní (instituce nerealizuje speciální vzdělávací programy)	3 - 5 let, 6 - 8 let	16 - 20 dětí	1 - 2	Žádné	Poměrně důležité	Poměrně důležité	Poměrně důležité	Student
9/29/2025 12:17:49	Česká republika	Žena	Bakalářský titul	Méně než jeden rok	Ve městě	Inkluzivní (instituce realizuje speciální vzdělávací programy)	1 - 3 roky, 3 - 5 let	21 - 25 dětí	2 - 4	1 - 2 děti	Velmi důležité	Poměrně důležité	Poměrně důležité	Učitel před nástupem do zaměstnání	Často	Vždy	Vždy	Vždy	Vždy	Vždy	Často	Často	Vždy	Někdy	Často	Často	Často	Někdy	Často	Často	Nikdy	Někdy	Nikdy	Nikdy	Nikdy	Často	Často	Často	Často	Někdy	Někdy	Často	Často	Často	Někdy	Někdy	Někdy	Někdy	Někdy
9/29/2025 13:53:18	Česká republika	Žena	V současné době pokračuji v získávání kvalifikace předškolní pedagog, Středoškolské vzdělání (úroveň 1)	Méně než jeden rok	Ve městě, V malém městě (městys)	Jiný	3 - 5 let				Poměrně důležité	Velmi důležité	Neutrální, bez názoru	Student
9/29/2025 16:01:46	Česká republika	Žena	Středoškolské vzdělání (úroveň 1)	3 - 5 let	Ve městě, Ve venkovské oblasti	Neinkluzivní (instituce nerealizuje speciální vzdělávací programy)	1 - 3 roky	11 - 15 dětí	1 - 2	Žádné	Velmi důležité	Neutrální, bez názoru	Poměrně důležité	Student
9/29/2025 16:05:29	Česká republika	Žena	Středoškolské vzdělání (úroveň 1)	Méně než jeden rok	Ve městě	Neinkluzivní (instituce nerealizuje speciální vzdělávací programy)	1 - 3 roky	1 - 5 dětí	1 - 2	Žádné	Velmi důležité	Velmi důležité	Velmi důležité	Student
9/29/2025 18:38:46	Česká republika	Žena	Magisterský titul	3 - 5 let	Ve městě	Jiný	Smíšené věkové skupiny	11 - 15 dětí	1 - 2	1 - 2 děti	Poměrně důležité	Velmi důležité	Neutrální, bez názoru	Učitel	Často	Vždy	Vždy	Vždy	Vždy	Vždy	Někdy	Vždy	Vždy	Často	Vždy	Často	Vždy	Často	Často	Někdy	Vždy	Vždy	Často	Často	Často	Často	Často	Často	Často	Často	Někdy	Často	Někdy	Často	Často	Často	Často	Často	Někdy
9/30/2025 17:42:35	Česká republika	Žena	Středoškolské vzdělání (úroveň 1)	Bez zkušeností	Jiný						Velmi důležité	Velmi důležité	Poměrně důležité, Velmi důležité	Student
9/30/2025 20:22:46	Česká republika	Žena	V současné době pokračuji v získávání kvalifikace předškolní pedagog	Méně než jeden rok	Ve městě	Inkluzivní (instituce realizuje speciální vzdělávací programy)	1 - 3 roky, 3 - 5 let	21 - 25 dětí	2 - 4	1 - 2 děti	Velmi důležité	Velmi důležité	Velmi důležité	Student
10/1/2025 17:15:30	Česká republika	Žena	V současné době pokračuji v získávání kvalifikace předškolní pedagog	Méně než jeden rok	Ve městě	Inkluzivní (instituce realizuje speciální vzdělávací programy)	Smíšené věkové skupiny	21 - 25 dětí	1 - 2	1 - 2 děti	Poměrně důležité	Poměrně důležité	Velmi důležité	Student
10/2/2025 22:02:44	Česká republika	Žena	Magisterský titul	Bez zkušeností	Ve venkovské oblasti	Inkluzivní (instituce realizuje speciální vzdělávací programy)	6 - 8 let	11 - 15 dětí	1 - 2	1 - 2 děti	Velmi důležité	Velmi důležité	Velmi důležité	Student
10/5/2025 15:29:14	Česká republika	Žena	V současné době pokračuji v získávání kvalifikace předškolní pedagog	Méně než jeden rok	Ve městě	Neinkluzivní (instituce nerealizuje speciální vzdělávací programy)	3 - 5 let	11 - 15 dětí	1 - 2	Žádné	Velmi důležité	Velmi důležité	Velmi důležité	Student
[truncated: 41 more columns]
